# Supplementary material for: The Kinase Chemogenomic Set (KCGS): An Open Science Resource for Kinase Vulnerability Identification
Source: MDPI journal article supplement (doi:10.3390/ijms22020566), 2021-01-08
Supplement: s1 [file s1]

### **Protocol for dilution and use of KCGS**

96-well plate assay single concentration screen at 1  $\mu$ M

Step 1: Add to each well of the KCGS plate 9  $\mu$ L of DMSO (initial concentration 10 mM; final concentration 1 mM)

Step 2: Take 1  $\mu$ L from each well and transfer to a daughter plate in the desired screening format

Step 3: Add 9  $\mu$ L of media to each well of the daughter plate (initial concentration 1 mM; final concentration 100  $\mu$ M)

Step 4: Add 1  $\mu$ L of the liquid from Step 3 to the cell-based assay (100  $\mu$ L total assay volume) to generate a final concentration of 1  $\mu$ M of the inhibitor with a DMSO concentration of 0.1%.

These steps provide enough volume to perform an assay allowing for both technical and biological replicates as well as a counter screen in a control cell line.
