# Supplementary material for: The Kinase Chemogenomic Set (KCGS): An Open Science Resource for Kinase Vulnerability Identification
Source: Int J Mol Sci. 2021 Jan 8;22(2):566. doi: 10.3390/ijms22020566 (PMC7826789; doi:10.3390/ijms22020566)
Supplement: Supplementary file 1 [file ijms-22-00566-s001.zip]

Archive with 10 entries (10 files):
- SI 1 KCGS Material in Trust Agreement.pdf
- SI 2 Protocol for dilution and use of KCGS.pdf
- SI Table 1 KCGS Kinase profiles.xlsx
- SI Table 2 KCGS Kinase Coverage.xlsx
- SI Table 3 SMARTS analysis.xlsx
- SI Table 4 Cell Toxicity Screen.xlsx
- SI Table 5 Plating densities and media.xlsx
- SI Table 6 GR values .xlsx
- SI Table 7 Autophagy raw data.xlsx
- SI Table 8 PKIS DiscoverX screening data.xlsx
