# Supplementary material for: The Kinase Chemogenomic Set (KCGS): An Open Science Resource for Kinase Vulnerability Identification
Source: Int J Mol Sci. 2021 Jan 8;22(2):566. doi: 10.3390/ijms22020566 (PMC7826789; doi:10.3390/ijms22020566)
Supplement: Supplementary file 1 [file ijms-22-00566-s001.zip › SI Table 1 KCGS Kinase profiles.xlsx]

## Sheet: Sheet1
Position	Inhibitor	PKIS	Kinases covered	New Kinases covered (≥10 PoC)	# Kinases (previous count)	# Kinases (updated count)	SMILES	Predicted Solubility	cLogP	SMARTS	Chemotype
A01	GSK2336394		PIK3CB		1		Cc1c(Cn2ccn3c2cc(nc3=O)N2CCOCC2)cccc1C(F)(F)F	Soluble	2.79	13	morpholines
A02	GSK2373690		PIK3CB, PIK3CG		2		C[C@@H]1CN(CCO1)c1cc(=O)n2nc(C)n(Cc3cccc(c3C)C(F)(F)F)c2n1	Moderately soluble	3.12	13	morpholines
A03	PFE-PKIS 1		MAPK14, MAPK11		2		O=C1C(Br)=C(OCC2=C(F)C=C(F)C=C2)C=C(C)N1C3=CC(C(NCC(N)=O)=O)=CC=C3C	Moderately soluble	3.61	29	1-aryl-pyridone
A04	GSK270822A	PKIS	ROCK1	ROCK1, ROCK2, JAK3, LATS2, SNARK, JAK2, TYK2	1		CC1=C(C(CC(=O)N1)c1ccc2ccccc2c1)C(=O)Nc1ccc2[nH]ncc2c1	Moderately soluble	3.12	27	5-amino-indazole
A05	GSK2297428		PIK3C3		1		Fc1ccccc1Cn1ccn2c1nc(cc2=O)N1CCOCC1	Soluble	1.74	13	morpholines
A06	JNK-IN-7		JNK1, JNK2, JNK3, IRAK1, YSK4, ERK3, RIOK2, PIP5K2C, CDKL5, ICK, DRAK1		11		O=C(NC1=CC=C(NC2=NC=CC(C3=CC=CN=C3)=N2)C(C)=C1)C4=CC=CC(NC(/C=C/CN(C)C)=O)=C4	Moderately soluble	3.45	7	2-anilino-4-aryl-pyrimidine
A07	GW406108X	PKIS	RAF1	BMPR2, MST2, CLK2, DYRK1A, PIK4CB, DYRK1B, JAK3, HASPIN, CLK1, NEK10, BRAF, HIPK2, HIPK3, GAK, CLK3, JAK1, ANKK1, DAPK2, CSNK2A1, PIM3, DAPK3	2		Oc1c(Cl)cc(C=C2C(=O)Nc3ccc(cc23)C(=O)c2ccco2)cc1Cl	Moderately soluble	3.87	2	oxindole
A08	PFE-PKIS 39		MET		1		CN(N=C1)C=C1C(C=C2)=NN3C2=NN=C3[C@@H](C)C4=CC=C(N=CC=C5)C5=C4	Soluble	2.59	20	6-sub-quinoline
A09	GW300660X	PKIS	CDK1, CDK2, CLK2, MELK	PIP5K1C, CSNK2A2, PCTK1, HASPIN, YSK4, DRAK1, CLK2, SNARK, HIPK2	4		NS(=O)(=O)c1ccc(N\N=C2/C(=O)Nc3ccc(cc23)C(=O)NCCc2c[nH]cn2)cc1	Soluble	0.55	2	oxindole
A10	GSK1122999		IKBKB, GSG2		2		C1CC(CCN1)Oc1cc2cnccc2cc1-c1ccccc1	Moderately soluble	3.47	38	6-Ar-isoquinoline
A11	ERK5-IN-1		MAPK7		1		O=C1C2=CC=CC=C2N(C3CCCC3)C4=NC(NC5=CC=C(C(N6CCC(N7CCN(C)CC7)CC6)=O)C=C5OCC)=NC=C4N1C	Poorly soluble	4	5	2-amino-pyrimido-diazepin-6-one
A12	DDR1-IN-1		DDR1		1		CC1=C(OC4=CC(CC(N5)=O)=C5C=C4)C=C(NC(C2=CC=C(CN3CCN(CC)CC3)C(C(F)(F)F)=C2)=O)C=C1.Cl.Cl	Poorly soluble	4.36	2	oxindole
A13	XMD8-92		MAPK7		1		O=C1N(C)C2=CN=C(NC3=CC=C(N4CCC(O)CC4)C=C3OCC)N=C2N(C)C5=CC=CC=C15	Moderately soluble	3	5	2-amino-pyrimido-diazepin-6-one
A14	BI00604564		Haspin, GAK, YSK4, PIP5K1C, MKNK2, IKKbeta, RIOK2		7		s2c1nc(cc(c1c3ncnc(c32)N)CCC)N4CCN(CCC4)C	Moderately soluble	2.91	4	fused amino-pyrimidine
A15	GW867253		PI4KB, PIK3CG		2		NS(=O)(=O)c1cccc(c1)-c1ccc2nccc(-c3cccc(c3)S(N)(=O)=O)c2c1	Moderately soluble	2.39	30	4-aryl-quinoline
A16	CCT244747		CHEK1, PRKAA1, RPS6KA1, RPS6KA3		4		C[C@](OC1=NC(NC(C=C2OC)=NC=C2C(C=N3)=CN3C)=CN=C1C#N)([H])CN(C)C	Soluble	1.55	39	2-alkyl or aryl amino-5-Ar-pyridine
A17	GW416981X	PKIS	CDK2, CDK1, MELK, IKKE, CDK3	ULK1, DRAK1, ULK2, PCTK1, MST2, CSNK2A2, ERK8, CLK2, CDK7, CDK4, DCAMKL3, CDKL5, DRAK2, TTK, MELK, STK16, CSNK2A1, DAPK2, BUB1, DAPK3	5		CC(C)COC(=O)c1ccc2NC(=O)\C(=C/Nc3ccc(cc3)S(N)(=O)=O)c2c1	Soluble	2.12	2	oxindole
A18	GW868318		MAPK14, MAPK11		2		COCCNC(=O)c1ccc(cc1)-c1cc(cc(F)c1C)C(=O)NC1CC1	Soluble	3.38	40	biphenylamide
A19	GW810372X	PKIS	GSK3B, CLK2, HIPK1	CDKL3, HIPK2, HIPK1, CLK1, HIPK3, CLK4, CLK2, ERK8, NEK7, JAK1, NEK5, STK16	3		COc1ccc2c(cnn2n1)-c1ccnc(Nc2cccc(OC(F)(F)F)c2)n1	Moderately soluble	3.32	7	2-anilino-4-aryl-pyrimidine
A20	GW572399X	PKIS	CDK2	FLT3, PDGFRB, PCTK1, PDGFRA	1		NS(=O)(=O)c1ccc(Nc2ncc(o2)-c2ccccc2)cc1	Soluble	2.01	21	2-amino-5-sub-oxazole
A21	GSK312879		ERBB2, EGFR, BRAF, ERBB4, STK36		5		Fc1cccc(F)c1C(=O)Nc1cccc(c1)-c1nn2ncccc2c1-c1ccnc(Nc2cccnc2)n1	Moderately soluble	4.14	31	2-anilino-4-(ortho-aryl)-heteroaryl-pyrimidine
A22	GSK336313		PLK2		1		COc1cc2ncn(-c3cc(OCc4ccncc4)c(s3)C(N)=O)c2cc1OC	Moderately soluble	2.44	10	thiophene-benzimidazole
A23	TPKI-72		AURKB		1		CN1C=CC2=C1C(OC1=CC=C(NC3=NC4=C(N3)C=CC=C4)C=C1)=NC=N2	Moderately soluble	3.15	32	4-XAr-5-sub-pyrrolo-pyrimidine
A24	GSK2283293		STK17A		1		C[C@H]1CC[C@H](CN1c1cc(nc(N)n1)-c1ccc2c(N)n[nH]c2c1)C(=O)Nc1ccccc1	Moderately soluble	2.41	1	6-Ar-indazole
B01	SB-725317	PKIS	CDK2, GSK3B	PIM2, GSK3B, ICK, TAOK1, RPS6KA4, ERK5, TAOK2, TAOK3, PDGFRB, DCAMKL3, YSK4, CDK4, MYLK2, DYRK2, JAK3, DYRK1B, GSK3A, PIM3	3		Oc1ccc(cc1)-c1nc2[nH]nc(NC(=O)C3CC3)c2cc1Br	Moderately soluble	2.65	1	6-Ar-indazole
B02	GSK461364		PLK1, NEK2		2		O=C(C1=C(O[C@@H](C2=CC=CC=C2C(F)(F)F)C)C=C(N3C=NC4=CC=C(CN5CCN(C)CC5)C=C34)S1)N	Poorly soluble	4.37	10	thiophene-benzimidazole
B03	GSK200398A	PKIS	ERBB4, ERBB2, EGFR	ERBB2, ERBB4, MEK5, ERBB3	3		Cl.O=C(O[C@H]1CN[C@@H](C1)C#Cc1cc2ncnc(Nc3ccc4n(Cc5ccccc5)ncc4c3)c2s1)N1CCOCC1	Poorly soluble	3.22	41	4-anilino-thieno[3,2]pyrimidine
B04	NVP-2		CDK9, TAOK3, HIPK4, CDK13, IRAK1, DYRK1A		6		ClC1=CN=C(N[C@H]2CC[C@H](N[C@H](C)COC)CC2)C=C1C3=CC=CC(NCC4(C#N)CCOCC4)=N3	Moderately soluble	3.76	42	2-alkylamino-4-Ar-pyridine
B05	TPKI-85		PIK3C3, GSK3B		2		CC1=NN=C(N1)C1=CC=C2OC=C(C2=C1)C1=CC=C(C=C1)S(C)=O	Moderately soluble	3.16	43	5-Ar-benzofuran
B06	GSK583		RIPK2		1		CC(C)(C)S(=O)(=O)C1=CC2=C(C=CN=C2C=C1)NC3=NNC4=C3C=C(C=C4)F	Moderately soluble	3.87	9	4-anilino-quinoline
B07	PFE-PKIS 40		PIK3CG, PIK3CA, PIK3C2G, PIK3CD, PIK3CB, PIK3C2B, MTOR, PI4KB		8		O=C1N([C@@H]2CC[C@@H](O)CC2)C3=NC(N)=NC(C)=C3C=C1C4=CC=C(OC)N=C4	Soluble	2.06	12	pyrimidopyridinone
B08	GW335962X	PKIS	KIT	VEGFR2, MINK, PDGFRA, TRKA, MST4	1		C\C(Nc1ccc(cc1)S(N)(=O)=O)=C1\C(=O)Nc2ccccc12	Soluble	1.44	2	oxindole
B09	PFE-PKIS 12		CASK		1		O=C(NCCCN1CCOC1=O)C2=CN=C(NCC3=C(Cl)C=CC(Cl)=C3)N=C2NC4CCCC4	Moderately soluble	3.69	44	2, 4-diamino-5-carboxamide-pyrimidine
B10	PFE-PKIS 21		MAP2K1		1		FC1=C(F)C=CC(C(NOC[C@H](O)CO)=O)=C1NC2=CC=C(I)C=C2F	Moderately soluble	3.24	8	other
B11	GNF-5		ABL1		1		C1=CC(=CC(=C1)C(=O)NCCO)C2=CC(=NC=N2)NC3=CC=C(C=C3)OC(F)(F)F	Moderately soluble	3.04	45	4-amino-6-Ar-pyrimidine
B12	BIBW3133BS		EGFR, ERBB2, IRAK1, MEK5, MKNK1, GAK, BUB1, LOK		8		Fc1c(cc(cc1)Nc2ncnc3c2cc(c(c3)OC)O[C@@H]4CC[C@H](CC4)N)Cl	Moderately soluble	4.05	3	4-anilino-quinazoline
B13	BI00133844		EGFR, ERBB2, EPHA6, LYN, BLK, RET, MEK5, EPHB4, LCK, SRC, HCK, ERBB4		12		Fc1c(cccc1Nc2ncnc3c2cc(c(c3)OC)O[C@@H]4CC[C@H](CC4)[C@@H]5NCCNC5=O)Cl	Moderately soluble	3.78	3	4-anilino-quinazoline
B14	HG-10-102-01		LRRK2		1		O=C(C1=CC(OC)=C(NC2=NC=C(Cl)C(NC)=N2)C=C1)N3CCOCC3	Soluble	2.03	11	2-anilino-4-alkylamino-pyrimidine
B15	GW855857		ACVR1B, TGFBR1, PRKD1, PRKD2, PRKD3		5		Cc1cccc(n1)-c1nc(Nc2ccncc2)c2ccccc2n1	Moderately soluble	3.15	14	4-amino-pyridines
B16	GW569293E		MAPK14, NLK, MAPK9, LATS1, MAPK10, GAK		6		OC(=O)\C=C\C(O)=O.OCCCNc1nccc(n1)-c1c(nn2cc(ccc12)C(F)(F)F)-c1ccc(F)cc1	Moderately soluble	3.8	18	2-alkylamino-4-(ortho-aryl)-heteroaryl-pyrimidine
B17	GW513184X	PKIS	GSK3B, AurkA	ADCK4, PIP5K2C, YSK4, EPHB6, CDK7, MEK5, PIKFYVE, CSNK2A2, GSK3A, TYK2, RIPK4	2		COc1cc(C=NNc2ncnc3n(ncc23)-c2ccccc2)ccc1O	Moderately soluble	2.64	15	hydrazinyl-pyrazolo-pyrimidine
B18	GW412617		MAP4K2		1		C[C@H](N[C@@H]1CCc2cc(ccc2C1)-c1cnc(N)c(C)c1)c1ccccc1	Moderately soluble	4.34	25	2-amino-5-Ar-pyridine
B19	VE-822		ATR, ATM		2		CC(C)S(=O)(=O)C1=CC=C(C=C1)C2=CN=C(C(=N2)C3=CC(=NO3)C4=CC=C(C=C4)CNC)N	Moderately soluble	3.11	33	2-amino-5-Ar-pyrazine
B20	TPKI-97		BRAF		1		COC(=O)C1=C(C2=CC=CC=C2)C2=CC(OC)=CC=C2C(=O)N1CC1=CC=CC=C1	Moderately soluble	4.28	22	isoquinolone
B21	SB-590885		BRAF, RAF1, RIPK2		3		CN(C)CCOC1=CC=C(C2=NC(C3=CC=C4/C(CCC4=C3)=N\O)=C(C5=CC=NC=C5)N2)C=C1	Moderately soluble	4.01	6	4-Ar-pyridine
B22	TX-85-1		ERBB3		1		CC(=O)N1CCN(CC1)C2CCC(CC2)N3C4=C(C(=N3)C5=CC(=C(C=C5)OC6=CC=CC=C6)NC(=O)C=C)C(=NC=N4)N	Moderately soluble	3.21	4	fused amino-pyrimidine
B23	CCT251921		CDK8, CDK19		2		O=C1NCCC12CCN(C3=C(Cl)C(N)=NC=C3C4=CC5=C(N(C)N=C5)C=C4)CC2	Moderately soluble	2.33	25	2-amino-5-Ar-pyridine
B24	CA93.0		GAK		1		COC1=C(OC)C(OC)=CC(NC2=C3C(C=CC(Br)=C3)=NC=C2)=C1	Moderately soluble	3.79	9	4-anilino-quinoline
C01	GW276655	PKIS	CDK1, CDK2	HASPIN, PCTK1, YSK4, DYRK1A, ROCK2, MINK, DYRK2, CSNK2A2, ICK, ROCK1	2		NS(=O)(=O)c1ccc(N\N=C2/C(=O)Nc3ccc(cc23)-c2cnco2)cc1	Soluble	1.12	2	oxindole
C02	GSK2656157		EIF2AK3, RIPK1, MAP3K2		3		NC1=NC=NC2=C1C(C3=CC=C4C(CCN4C(CC5=NC(C)=CC=C5)=O)=C3F)=CN2C	Moderately soluble	2.98	4	fused amino-pyrimidine
C03	GSK237701A	PKIS	NEK9, PDGFRB, PDGFRA, PLK1	MST2, PIP5K1A, PLK1, LOK, VPS34, SLK, WNK3, BIKE, PLK2, PLK3, MAP3K1, WNK1, NEK2, SNARK, YSK4, WNK2, MAP4K5, PAK3, NEK5, FLT4, PIP5K1C	4		COc1cc2ncn(-c3cc(O[C@H](C)c4ccccc4Cl)c(s3)C(N)=O)c2cc1OC	Moderately soluble	3.95	10	thiophene-benzimidazole
C04	SB-747651A		MSK1, RSK, p70S6K, PRK2, ROCK2		5		NC1=NON=C1C(N2CC)=NC3=C2C(CNC4CCNCC4)=CN=C3	Very soluble	0.65	16	aminofurazan
C05	BIRZ0518XX		PRKCQ, PRKCE, PRKCD		3		FC(F)(F)OC1=CC=CC=C1CNC2=NC=C([N+]([O-])=O)C(NCC3CCC(CN)CC3)=N2	Moderately soluble	3.04	46	2,4-di-alkylamino-pyrimidine
C06	GSK204607		PLK2, PLK1, PLK3, MAP2K5, STK10		5		COc1cc2ncn(-c3cc(OCC4CCCO4)c(s3)C(N)=O)c2cc1OC	Soluble	2.38	10	thiophene-benzimidazole
C07	PFE-PKIS 44		CDK4		2		CC(C1=CN=C(NC2=NN(C)C=C2)N=C1N3C4CCCC4)=C(C(C)=O)C3=O	Soluble	2.27	12	pyrimidopyridinone
C08	XMD8-87		FRK, PTK6, TNK2		3		O=C1C2=C(C=CC=C2)N(C)C3=NC(N(C4=C(OC)C=C(N5CCN(C)CC5)C=C4)[H])=NC=C3N1	Moderately soluble	2.59	5	2-amino-pyrimido-diazepin-6-one
C09	GW300657X	PKIS	CDK1, CDK2	PCTK1, DRAK1, YSK4, ERK8, DRAK2, TTK, CDKL5, SRPK2, TRKA, SNARK, HIPK2	4		NS(=O)(=O)c1ccc(N\N=C2/C(=O)Nc3ccc(cc23)C(=O)NCc2ccncc2)cc1	Soluble	1.13	2	oxindole
C10	GR269666A	PKIS	ERBB4	ERBB2, ERBB4, MEK5, EGFR	1		Cl.C(c1nc2ccc(Nc3ncnc4ccccc34)cc2[nH]1)c1ccccc1	Poorly soluble	3.89	3	4-anilino-quinazoline
C11	BMX-IN-1		BMX, BTK		2		CS(NC1=CC=C(C2=CC=C(N=CC(C=C3)=C4N(C5=CC(NC(C=C)=O)=C(C)C=C5)C3=O)C4=C2)C=C1)(=O)=O	Moderately soluble	3.94	20	6-sub-quinoline
C12	SB-216385		MAP2K4, MAP2K3		2		Nc1nccc(n1)-c1c(ncn1CCCN1CCOCC1)-c1ccc(F)cc1	Soluble	2.03	18	2-alkylamino-4-(ortho-aryl)-heteroaryl-pyrimidine
C13	BI00801818		FAK, RSK2, DYRK1A, RSK1, CLK1, CLK4		6		Brc1c(ccc(c1)C(=O)NCCC)Nc2nc(c(cn2)C(F)(F)F)Nc3c(cccc3)C(=O)C	Poorly soluble	5.06	17	2,4-dianilino-pyrimidine
C14	WZ4003		NUAK1, NUAK2		2		CN(CC3)CCN3C(C=C2)=CC(OC)=C2NC1=NC=C(Cl)C(OC4=CC(NC(CC)=O)=CC=C4)=N1	Moderately soluble	3.54	47	2-anilino-4-O-Ar-pyrimidine
C15	BI00113608		EGFR, EPHA6, ERBB2, EPHB4, BLK		5		Fc1c(cccc1Nc2ncnc3c2cc(c(c3)OC)O[C@@H]5CC[C@@]4(NCCNC4=O)CC5)Cl	Moderately soluble	3.52	3	4-anilino-quinazoline
C16	GSK190937		PDGFRA		1		Cc1cnc(N)c(\C=C\c2cncc(c2)C(=O)NCCc2ccc(Cl)cc2Cl)c1	Moderately soluble	4.26	48	2-amino-pyridine
C17	GW429374A		IKBKE, MAP4K4		2		Cl.Oc1c(Br)cc(C=C2C(=O)Nc3ccc(cc23)-c2cccnc2)cc1Br	Poorly soluble	3.97	2	oxindole
C18	GW440146		MAP2K5, BLK		2		Cc1ccc(cc1)C(=O)Nc1ccc(Nc2ccnc3cc(ccc23)-c2ccccn2)cc1O	Poorly soluble	4.55	9	4-anilino-quinoline
C19	GSK2328680		PIK3CB		1		Cc1c(C)n2c(nc(cc2=O)N2CCOCC2)n1Cc1cccc(c1C)C(F)(F)F	Moderately soluble	3.38	13	morpholines
C20	NVS-PAK1-1		PAK1		1		O=C(N1C[C@@H](NC2=NC3=CC(F)=CC=C3N(CC(F)F)C4=CC=C(Cl)C=C42)CC1)NC(C)C	Moderately soluble	4.42	8	other
C21	HTH-01-015		NUAK1		1		O=C1N(C)C2=C(N=C(NC3=CN(C4CCNCC4)N=C3)N=C2C)N(C)C5=CC6=CC=CC=C6C=C51	Moderately soluble	2.88	5	2-amino-pyrimido-diazepin-6-one
C22	VE-821		ATR		1		NC1=C(C(N([H])C2=CC=CC=C2)=O)N=C(C3=CC=C(S(=O)(C)=O)C=C3)C=N1	Soluble	1.95	33	2-amino-5-Ar-pyrazine
C23	SB-219980		CSNK1D, CSNK1E, MAPK10, CSNK1A1, MAPK9, MAPK14, PIP4K2C		7		Nc1nccc(n1)-c1c(ncn1C1CCN(Cc2ccccc2)CC1)-c1ccc(F)cc1	Moderately soluble	3.49	18	2-alkylamino-4-(ortho-aryl)-heteroaryl-pyrimidine
C24	GW621970X	PKIS	FLT1, KIT, YES	CSNK2A2, EPHB6, VEGFR2, PIP5K2C, MEK5, FLT3, FLT4, PDGFRB, CSF1R, CSNK2A1, ABL1	3		CCS(=O)(=O)c1ccc(OC)c(Nc2ncc(o2)-c2cccc(F)c2)c1	Moderately soluble	3.56	21	2-amino-5-sub-oxazole
D01	GSK2376236		PDPK1		1		CC[C@@H]1CO[C@@H](CN1c1cc(nc(NC)n1)-c1ccc2c(N)n[nH]c2c1)C(=O)Nc1ccccc1	Moderately soluble	2.5	1	6-Ar-indazole
D02	GSK949675	PKIS	AKT1, AKT2, PRKCH	PIP5K1C, PRKCE, YSK4, AKT3, PRKG2, NIK, AKT2, PRKCQ, AKT1, RPS6KA4, MAP3K2, PRKX, PKN1	3		Cl.CCn1c(nc2c(nc(OCCNC)cc12)C#CC(C)(C)O)-c1nonc1N	Soluble	0.84	16	aminofurazan
D03	BI00645435		RPS6KA6, NUAK2, STK17A, STK17B, RSK2, LRRK2, PRKD1		7		O=C(C1=CC2=C(C=C1)C=C3N2[C@H](C)CCNC3=O)NC4=NC5=CC=CC=C5N4CCCN(C)C	Moderately soluble	2.88	19	amide hinge binder
D04	GSK299115A	PKIS	ROCK1	ROCK1, ROCK2, LATS2, JAK3	1		CC1=C(C(CC(=O)N1)c1ccc(Cl)c(Cl)c1)C(=O)Nc1ccc2[nH]ncc2c1	Moderately soluble	3.28	27	5-amino-indazole
D05	GSK2850163		ERN1		1		O=C(N(CCC1)C[C@]21CCN(CC3=CC=C(Cl)C(Cl)=C3)C2)NCC4=CC=C(C)C=C4	Moderately soluble	4.6	8	other
D06	GW305074X		PIM2, cRAF, MAPK3		3		Oc1c(Br)cc(C=C2C(=O)Nc3ccc(I)cc23)cc1Br	Poorly soluble	4.27	2	oxindole
D07	TPKI-91		GSK3A, GSK3B		2		COC1=CC=C(CSC2=NN=C(O2)C2=CC3=C(C=C2)N=CS3)C=C1C(F)(F)F	Moderately soluble	4.97	49	6-Ar-benzothiazole
D08	BI00007366		EGFR, BUB1, ERBB2, GAK		4		N1(CCC(CC1)Oc3c(cc2ncnc(c2c3)Nc4cc(ccc4)C#C)OC)C	Moderately soluble	3.58	3	4-anilino-quinazoline
D09	GSK1379762		MAP2K5		1		COc1cc(Nc2nccc(n2)N2CCC(C2)NC(=O)Nc2cc(C)ccc2C)cc(OC)c1OC	Moderately soluble	3.37	11	2-anilino-4-alkylamino-pyrimidine
D10	GSK1398477		PDGFRB		1		Cc1ccc(NC(=O)Nc2ccccc2F)cc1-c1ccc(cc1)C(=O)Nc1ccncc1	Moderately soluble	4.41	14	4-amino-pyridines
D11	JH-II-127		LRRK2, CHK2, MLCK		3		CNC1=C2C(NC=C2Cl)=NC(NC3=CC=C(C(N4CCOCC4)=O)C=C3OC)=N1	Moderately soluble	2.34	50	2-anilino-4-alkylamino-pyrrolopyrimidine
D12	SGC-AAK1-1		AAK1, RIOK1, BMP2K		3		O=S(N(CC)CC)(NC1=CC(C2=CC3=C(C(NC(C4CC4)=O)=NN3)C=C2)=CC=C1)=O	Moderately soluble	2.69	1	6-Ar-indazole
D13	PFE-PKIS 41		MAPK14		1		CC1=CC(OCC2=C(F)C=C(F)C=C2)=C(Br)C(N1C3=C(C)C=CC(C(NC)=O)=C3)=O	Moderately soluble	4.57	29	1-aryl-pyridone
D14	Vertex 11e		MAPK1, MAPK3		2		[H]N1C(C(N[C@H](CO)C2=CC=CC(Cl)=C2)=O)=CC(C3=NC(NC4=C(Cl)C=C(F)C=C4)=NC=C3C)=C1	Moderately soluble	4.4	7	2-anilino-4-aryl-pyrimidine
D15	GW560459		RPS6KA6		1		Nc1nc(c(s1)-c1ccnc2ccccc12)-c1ccccc1F	Moderately soluble	4.09	30	4-aryl-quinoline
D16	BI00601000		MAPK14		1		Fc1c(ccc(c1)F)Nc2cc3c(cc2)N(C(=O)N3)CC4CCCCC4	Moderately soluble	4.62	51	imidazolone
D17	GW440135		KIT, MAP2K5, KDR, PDGFRA		4		COc1cc2nccc(Nc3ccc(OCc4ccc(NC(C)=O)cc4)cc3)c2cc1OC	Moderately soluble	4.02	9	4-anilino-quinoline
D18	GW442130X	PKIS	NTRK1, NTRK3, AURKA	TRKA	3		COc1ccccc1-c1cc(\C=C2/C(=O)Nc3ncc(Br)cc23)cc(Br)c1O	Poorly soluble	4.36	2	oxindole
D19	GSK1379761		JAK2		1		COc1cc(Nc2nccc(n2)N2CCC(C2)NC(=O)C2COc3ccccc3O2)cc(OC)c1OC	Moderately soluble	2.55	11	2-anilino-4-alkylamino-pyrimidine
D20	AH5015		TYK2		1		Nc1ncnc2[nH]c(nc12)-c1ccccc1	Soluble	1.67	4	fused amino-pyrimidine
D21	GSK1392956A	PKIS	INSR, IGF1R, PTK2B	JNK1, JNK2, JNK3, ALK, CHEK2, MYLK, INSR, HIPK4, INSRR, STK33, CLK1, PYK2, CLK2, DAPK3, FAK, TTK, RSK2, PLK1, DAPK2, GAK, CLK4, IGF1R	3		COc1cc(ccc1Nc1nc(Nc2ccc(F)cc2C(=O)NC[C@@H](O)CO)c2cc[nH]c2n1)N1CCN(CC1)C(C)C	Moderately soluble	2.83	23	2,4-dianilino-pyrrolopyrimidine
D22	CCT241533		CHEK2, MARK3, PHK		3		FC1=CC(C3=NC2=CC(OC)=C(OC)C=C2C(N[C@H]4[C@H]([C@](C)(O)C)CNC4)=N3)=C(O)C=C1.Cl.Cl	Poorly soluble	2.92	52	ortho-quinazololinyl-phenol
D23	GSK2269557		PIK3CD		1		CC(C)N1CCN(Cc2cnc(o2)-c2cc(cc3[nH]ncc23)-c2cccc3[nH]ccc23)CC1	Moderately soluble	3.63	1	6-Ar-indazole
D24	GSK2292767		PIK3CD		1		COc1ncc(cc1NS(C)(=O)=O)-c1cc(-c2ncc(CN3C[C@H](C)O[C@H](C)C3)o2)c2cn[nH]c2c1	Moderately soluble	2.22	1	6-Ar-indazole
E01	GW282449A	PKIS	ERBB4	CHEK2, ERBB2, ERBB3, ERBB4, MEK5, EGFR, CSK	1		Cl.COc1cc2ncnc(Nc3ccc4n(Cc5ccccc5)ncc4c3)c2cc1OC	Poorly soluble	3.52	3	4-anilino-quinazoline
E02	GSK579289A	PKIS	NEK2, NEK9, PLK1	PAK3, PLK1, SNARK, WNK4, RPS6KA4, LOK, WNK2, JAK3, SLK, CSNK2A2, NEK2	3		C[C@@H](Oc1cc(sc1C(N)=O)-n1cnc2ccc(OC3CCN(C)CC3)cc12)c1ccccc1Cl	Poorly soluble	4.41	10	thiophene-benzimidazole
E03	GSK2298859		PDPK1, PRKX, STK17B, STK17A		4		CNc1nc(cc(n1)-c1ccc2c(N)n[nH]c2c1)N1C[C@H](CC[C@H]1C)C(=O)Nc1ccccc1	Moderately soluble	2.79	1	6-Ar-indazole
E04	GSK2288359		PDPK1		1		Nc1n[nH]c2cc(ccc12)-c1cc(nc(N)n1)N1CCC[C@H](C1)C(=O)Nc1ccccc1	Moderately soluble	2.05	1	6-Ar-indazole
E05	PFE-PKIS 25		JAK3, JAK2, JAK1, TYK2, DCLK3		5		CN([C@H]1CN(C(CC#N)=O)CC[C@H]1C)C2=C3C(NC=C3)=NC=N2	Soluble	1.21	28	4-amino-pyrrolo-pyrimidine
E06	PFE-PKIS 34		JAK3, JAK2		2		CN([C@H]1CN(C(CO)=O)CC[C@H]1C)C2=C3C(NC=C3)=NC=N2	Soluble	0.78	28	4-amino-pyrrolo-pyrimidine
E07	GW811761X		CLK2, MAPK15, CLK1, HIPK2, HIPK3		5		CCOc1ccc2c(cnn2n1)-c1ccnc(Nc2cccc(c2)C(F)(F)F)n1	Moderately soluble	3.76	7	2-anilino-4-aryl-pyrimidine
E08	XMD-17-51		NUAK1, ABL1, AURKA		3		CN(C1=CN=C(NC2=CN(C3CCNCC3)N=C2)N=C1N(C)C4=C5C=CC=C4)C5=O	Soluble	1.73	5	2-amino-pyrimido-diazepin-6-one
E09	BI00009348		PIK3CG, PIP5K2C, TAK1, YSK4, RSK4, PIP5K1C, BMPR2, STK16		8		S(=O)(=O)(CCN1CCOCC1)c2cc(ccc2)Nc3nc4c(cn3)N(C(=O)CN4C(C)C)C	Soluble	1.47	34	2-amino-dihydropteridinone
E10	CCT251545		CDK19, CDK8		2		O=C(NCC1)C1(CC2)CCN2C3=C(C4=CC=C(C5=CN(C)N=C5)C=C4)C=NC=C3Cl	Moderately soluble	3.07	24	3-aryl-pyridine
E11	TPKI-105		MAPK10		1		CCC(=O)C1=C(C2=CC=CC=C2)C2=CC(Cl)=CC=C2C(=O)N1CC1=NN(CC(N)=O)C(=C1)S(C)(=O)=O	Moderately soluble	2.81	22	isoquinolone
E12	SB-708998		MYLK2		1		Brc1cc2c(NC(=O)C3CC3)n[nH]c2nc1-c1ccccc1	Moderately soluble	2.97	1	6-Ar-indazole
E13	SB-693162		MAP3K19		1		CCn1c(nc2ccccc12)-c1nonc1N	Soluble	1.43	16	aminofurazan
E14	SB-633825	PKIS	STK10	LOK, SLK, DDR1, TIE2, TIE1, TGFBR1	1		COc1ccc2cc(ccc2c1)-c1c(nc(-c2ccc(cc2C)S(C)(=O)=O)n1C)-c1ccncc1	Poorly soluble	4.72	6	4-Ar-pyridine
E15	GW784752X	PKIS	GSK3A	IRAK3, BMPR1B, MEK5, GSK3B, CSNK2A2, ACVRL1, RIPK4, ERBB3, CDKL5, ACVR1, BRAF, ABL1, CDK7	1		COc1cccc(c1)-n1ncc2c(N\N=C\c3ccncc3)ncnc12	Soluble	2.25	15	hydrazinyl-pyrazolo-pyrimidine
E16	GW780159X		RPS6KA6		1		Nc1nc(c(s1)-c1ccc2ncccc2n1)-c1cccc(Cl)c1	Moderately soluble	3.72	20	6-sub-quinoline
E17	GW580509X	PKIS	FLT1, TNK1, KIT	EPHB6, CLK2, CSNK2A2, MEK5, FLT3, CLK1, KIT, ABL1, PDGFRB	3		CCS(=O)(=O)c1ccc(OC)c(Nc2ncc(o2)-c2cccc(OC)c2)c1	Moderately soluble	3.21	21	2-amino-5-sub-oxazole
E18	GW525701		EPHB6		1		Cn1ccc(n1)-c1cccc(Nc2ccnc3cc(ccc23)-c2nccs2)c1	Moderately soluble	4.14	9	4-anilino-quinoline
E19	SB-282975		CSNK1D		1		Cc1nccc(n1)-c1c(ncn1CCCN1CCOCC1)-c1ccc(F)cc1	Soluble	2.77	35	2-O or C sub-4-(ortho-aryl)-heteroaryl-pyrimidine
E20	SB-735464		NLK		1		Fc1cccc(c1)-c1ccc2c(NC(=O)C3CC3)n[nH]c2c1	Soluble	3.19	1	6-Ar-indazole
E21	TPKI-39		KIT, PDGFRB, CIT, PDGFRA, DDR1, CSF1R, FLT1, KDR		8		O=C(NC1=CC=CC=C1)NC1=CC=CC(OC2=NN3C=CN=C3C=C2)=C1	Soluble	2.77	26	5,6-fused imidazole/pyrazole
E22	TPKI-69		KIT, PDGFRB, PDGFRA, FLT3, KDR, CSF1R		6		CN1C=CC2=C1C(OC1=CC=C(NC(=O)NC3=CC=CC=C3)C=C1)=NC=N2	Moderately soluble	2.85	32	4-XAr-5-sub-pyrrolo-pyrimidine
E23	THZ531		CDK12, CDK13		2		CN(C)C\C=C\C(=O)NC1=CC=C(C=C1)C(=O)N1CCC[C@H](C1)NC1=NC=C(Cl)C(=N1)C1=CNC2=CC=CC=C12	Moderately soluble	3.74	53	2-amino-4-aryl-pyrimidine
E24	TH257		LIMK2		1		O=C(N(CCCC)CC1=CC=CC=C1)C(C=C2)=CC=C2S(NC3=CC=CC=C3)(=O)=O	Moderately soluble	4.12	8	other
F01	GSK1838705		ALK, CLK2, CLK1, FER, FES, IGF1R, IRR, MYLK		8		CNC(C1=C(NC2=NC(NC3=C(OC)C=C4CCN(C(CN(C)C)=O)C4=C3)=NC5=C2C=CN5)C=CC=C1F)=O	Moderately soluble	3.14	23	2,4-dianilino-pyrrolopyrimidine
F02	GSK872		RIPK3		1		O=S(C1=CC=C2N=CC=C(NC3=CC=C(SC=N4)C4=C3)C2=C1)(C(C)C)=O	Moderately soluble	3.9	9	4-anilino-quinoline
F03	GSK2578215		LRRK2		1		FC1=NC=CC(C2=CC=C(OCC3=CC=CC=C3)C(C(NC4=CC=CN=C4)=O)=C2)=C1	Moderately soluble	3.97	19	amide hinge binder
F04	GSK2334470		PDPK1		1		O=C([C@@H]1CN(C2=NC(NC)=NC(C3=CC4=C(C=C3)C(N)=NN4)=C2)[C@H](C)CC1)NC5CCCCC5	Moderately soluble	2.98	1	6-Ar-indazole
F05	GW282974X	PKIS	ERBB2, ERBB4	ERBB2, MEK5, ERBB3, CHEK2	2		CN(C)c1cc2c(Nc3ccc4n(Cc5ccccc5)ncc4c3)ncnc2cn1	Moderately soluble	3.4	3	4-anilino-quinazoline
F06	GW814408X	PKIS	AURKC	GSK3A, BMPR1B, MEK5, TYK2, YSK4, GSK3B, PIKFYVE, ABL1, CSNK2A2, PAK3, ERK8, CDK7, EPHB6, CDKL5, KIT, PDGFRB, LCK, DYRK1A, CDKL3, PDGFRA, DYRK2, ERK4, GCN2, PIP5K2C	1		COc1cccc(c1)-c1c[nH]c2c(N\N=C\c3ccncc3)ncnc12	Moderately soluble	2.55	15	hydrazinyl-pyrazolo-pyrimidine
F07	GW434756X		MAPK14, MAPK9, CSNK1A1, RPS6KA6, NLK, MAPK10		6		Fc1ccc(cc1)-c1nn2ccccc2c1-c1ccncc1	Moderately soluble	3.64	6	4-Ar-pyridine
F08	BI00047804		PIK3CG, NEK5, CLK4, CLK1, NEK3, CLK3, PIK3CA		7		Clc1c(cccc1)-c2nc-3c(cn2)CCc4nc(sc4-3)NC(=O)N5C[C@@H](CC5)NC(=O)C(C)C	Moderately soluble	3.6	54	2-amino-thiazole
F09	UNC-AA-1-0017		AAK1, BMP2K, PIP5K1C		3		O=S(N(C)CC)(NC1=CC(C2=CC3=C(C(NC(C4CC4)=O)=NN3)C=C2)=CC=C1)=O	Soluble	2.43	1	6-Ar-indazole
F10	BIBF0846CL		YSK4, FLT3, PDGFRB, RET, SNARK		5		N4c1c(cc(c(c1)OC)OC)C(=C(Nc2ccccc2)c3cc(ccc3)CN)C4=O	Moderately soluble	2.99	2	oxindole
F11	GW830263A	PKIS	KDR, AURKC	AURKA, CSF1R, DDR1, DDR2, KIT, PAK3, PDGFRB, RET, RIOK3, YSK4, IRAK3, MEK5, AURKC, AURKB, FLT1, LOK, PIP5K2C, BMPR1B, VEGFR2, FLT3, ROCK2, CDKL2, FLT4, PDGFRA, TRKC, RIOK1, SRPK1, BIKE, HPK1, PLK4, MAP3K4, MKNK2, TYK2, EPHB6, GRK4, JAK2, JAK3, RIPK5, JNK1, MEK4, TNK2, TYK2, TNK1, MYO3A, TRKA, FLT3, ULK3, SRPK3, TIE1, JNK3, MET, SLK, PIP5K1A, AXL	2		CN(c1nc(Nc2ccc(CS(C)(=O)=O)cc2)ncc1)c3ccc(NC(Nc4ccc(C(N5CCN(CC5)C)=O)cc4)=O)cc3.Cl	Poorly soluble	2.68	17	2,4-dianilino-pyrimidine
F12	TPKI-100		MAPK10		1		COC(=O)C1=C(C2=CC=CC=C2)C2=CC(Br)=CC=C2C(=O)N1CC1=CC=C(C=C1)S(C)(=O)=O	Moderately soluble	4.58	22	isoquinolone
F13	TPKI-26		PLK1, PKL2, PKL3		3		CC[C@]1(F)CN(C2CCCC2)c3nc(Nc4ccc(cc4OC)C(=O)NC5CCN(C)CC5)ncc3N(C)C1=O	Moderately soluble	3.39	5	2-amino-pyrimido-diazepin-6-one
F14	BI00865461		MEK5, RAF1, BRAF, SRMS, ZAK		5		Fc1c(c(ccc1NS(=O)(=O)CCC)F)-n2nnc(c2)-c3cncc(c3)OC	Soluble	2.56	24	3-aryl-pyridine
F15	GW632580X	PKIS	CSF1R	CSF1R, TRKB, TRKC, TRKA	1		COc1ccc(COc2ccc(Cc3cnc(N)nc3N)cc2OC)cc1	Soluble	2.51	55	2,4-diamino-5-benzyl-pyrimidine
F16	BI2536		PLK1, PLK2, PLK3, RPS6KA4, CAMKK1, CAMKK2, MYLK		7		O=C1[C@H](N(C2=C(N1C)C=NC(NC3=CC=C(C(NC4CCN(C)CC4)=O)C=C3OC)=N2)C5CCCC5)CC	Moderately soluble	2.92	34	2-amino-dihydropteridinone
F17	GW651576X		EGFR		1		Fc1cccc(COc2ccc(Nc3ncncc3C#Cc3ccccc3)cc2Cl)c1	Poorly soluble	5.57	56	4-anilino-5-sub-pyrimidine
F18	SB-742609		GSK3A		1		Brc1cc2c(NC(=O)C3CCCC3)n[nH]c2nc1-c1nccs1	Moderately soluble	3	1	6-Ar-indazole
F19	TPKI-58		MAP3K5		1		CC(C)(C)C1=CC=C(C=C1)C(=O)NC1=CN2C=C(C=CC2=N1)C1=CC=CN=C1	Moderately soluble	3.96	26	5,6-fused imidazole/pyrazole
F20	BIRB0876BS		DDR1, MAPK14		2		n1(nc(cc1NC(=O)Nc2ccc(cc2)OCCN3CCOCC3)C(C)(C)C)-c4ccc(cc4)C	Moderately soluble	3.97	57	type II urea
F21	BI01125081		YSK4, SYK, ZAP70, JAK2		4		N1(CCOCC1)c2ncc(cc2)-c4cc3ncccc3c(c4)OCc5ncccc5C(=O)N	Moderately soluble	2.41	58	5,7-disub-quinoline
F22	GW280670X	PKIS	CDK2	none	1		NS(=O)(=O)c1ccc(N\N=C2/C(=O)Nc3ccc(Cl)cc23)cc1	Soluble	1.48	2	oxindole
F23	FM-381		JAK3, JAK1, PIK3C2G		3		N(C)(C)C(C(\C#N)=C\C(=CC=C1C2N(C(C(N=2)=C2)=C(C(=N2)N2)C=C2)C(C2)CCCC2)O1)=O	Moderately soluble	3.12	37	fused pyrrolo-pyrid(az)ine
F24	D2202-1		DDR1, NTRK3, NTRK2, NTRK1		4		Cc1cn(cn1)c1cc(cc(c1)NC(c1ccc2c(CN(C[C@@H]2C)c2cncnc2)c1)=O)C(F)(F)F	Moderately soluble	4.02	59	5-amino-pyrimidine
G01	GSK2606414		EIF2AK3, RIPK1		2		FC(C1=CC(CC(N2CCC3=C2C=CC(C4=CN(C)C5=NC=NC(N)=C54)=C3)=O)=CC=C1)(F)F	Moderately soluble	4.02	4	fused amino-pyrimidine
G02	GSK2250882		STK17A		1		CC(C)c1cc(nc(N)n1)-c1ccc2c(N)n[nH]c2c1	Soluble	1.86	1	6-Ar-indazole
G03	GSK481		RIPK1		1		O=C(C1=NOC(CC2=CC=CC=C2)=C1)N[C@H]3COC4=CC=CC=C4N(C)C3=O	Moderately soluble	2.44	8	other
G04	K05908		BMPR1B, ACVR1, ACVRL1, RIPK2, BMPR1A, LCK, ACVR1B, TGFBR1		8		COC1=CC(C2=CN=CC(C3=CN(C4CCNCC4)N=C3)=C2)=CC(OC)=C1OC	Soluble	2.69	24	3-aryl-pyridine
G05	PFE-PKIS 32		CDK4, TTK		3		CC(C1=CN=C(NC2=NC=C(N3CCNCC3)C=C2)N=C1N4C5CCCC5)=C(C(C)=O)C4=O	Soluble	2.32	12	pyrimidopyridinone
G06	GSK1904529		IGF1R, INSR, FER, FRK		4		O=C(NC1=C(F)C=CC=C1F)C2=CC(C3=C(C4=NC(NC5=CC(CC)=C(N6CCC(N7CCN(S(=O)(C)=O)CC7)CC6)C=C5OC)=NC=C4)N8C=CC=CC8=N3)=CC=C2OC	Poorly soluble	5.32	31	2-anilino-4-(ortho-aryl)-heteroaryl-pyrimidine
G07	BI00614644		MAPKAPK2, MAPKAPK5, PIM3		3		O=C(C1=CC2=C(C=C1)C=C3N2CC(CN)CNC3=O)NC4=CC=CN=C4	Soluble	0.98	19	amide hinge binder
G08	GSK114		TNNI3K, ACK1, ZAK, PDGFRB		4		COC1=CC2=NC=NC(N(C3=C(N(C)C)C=CC(S(=O)(N(C)[H])=O)=C3)[H])=C2C=C1OC	Soluble	2.07	3	4-anilino-quinazoline
G09	SB-517081		KIT		1		Nc1n[nH]c2ncc(cc12)-c1ccccc1	Soluble	1.97	60	5-Ar-indazole
G10	TPKI-106		MAPK10, MAPK14		2		CCC1=NC(=C(S1)C1=CC=NC=C1)C1=CC(C)=CC=C1	Moderately soluble	4.19	6	4-Ar-pyridine
G11	SB-733894		MYLK2		1		Fc1cccc(-c2ccc3c(NC(=O)C4CC4)n[nH]c3c2)c1F	Moderately soluble	3.53	1	6-Ar-indazole
G12	GW792479		PIP4K2C		1		O=C(N1CCCC1)c1ccc(cc1)-c1cc(ccn1)-c1c[nH]nc1-c1ccccn1	Moderately soluble	3.26	6	4-Ar-pyridine
G13	GW576924A	PKIS	EGFR, ERBB2	ERBB2, EGFR	2		Cl.Fc1cc(Nc2ncnc3ccc(cc23)-c2ccc(CN3CCS(=O)CC3)o2)ccc1OCc1ccccc1	Poorly soluble	4.11	3	4-anilino-quinazoline
G14	GW684088		TGFBR1, MINK1		2		Cc1ccc(cc1)-c1cc(ccn1)-c1c[nH]nc1-c1ccccn1	Moderately soluble	3.43	6	4-Ar-pyridine
G15	GW642138X		TYK2		1		COc1ccc(cc1)-c1cc2c(N)ncnc2o1	Soluble	2.07	4	fused amino-pyrimidine
G16	GW683134A	PKIS	KDR, TEK, KIT	AXL, DDR1, RET, LOK, MERTK, PDGFRB, CIT, KIT, EPHA8, TIE1, FLT3, CSF1R, FLT4, TIE2, TRKC, ABL2, EPHB6, FLT1, ZAK, TRKA, DDR2, MUSK, PAK3, TRKB, LTK, LCK, CDKL2, ABL1, TAK1, RAF1, STK33, NEK9	3		Cl.Fc1ccc(cc1NC(=O)Nc1ccc(Oc2ccc3[nH]c(NC(=O)c4ccco4)nc3c2)cc1)C(F)(F)F	Poorly soluble	4.52	36	2-amino-6—X-Ar-benzimidazole
G17	THZ1		CDK7, IGF1R, INSR, MAP3K11, MAPK8, TBK1, TYK2		1		ClC1=CN=C(N=C1C2=CNC3=CC=CC=C23)NC4=CC=CC(NC(C5=CC=C(NC(/C=C/CN(C)C)=O)C=C5)=O)=C4	Poorly soluble	4.45	7	2-anilino-4-aryl-pyrimidine
G18	GSK2219385	PKIS	IGF1R, INSR	ALK, INSRR, INSR, IGF1R, MYLK	2		COc1cc(C)c(cc1Nc1nc(Nc2cccc(F)c2C(N)=O)c2cc[nH]c2n1)N(C)C(=O)CN(C)C	Moderately soluble	2.94	23	2,4-dianilino-pyrrolopyrimidine
G19	GW296115X	PKIS	BRSK1, BRSK2, RSK3	PIKFYVE, YSK4, PDGFRB, GAK, DRAK1, PIM2, MEK5, PRKG2, PLK4, CHEK2, MINK, DRAK2, MLK1, PIM3, MAP4K4, LRRK2, TNIK, PAK3, DAPK3, DAPK2, MLK3, RSK4, BRSK2, SGK, MYLK, EPHB6, SGK3, SIK2, BRSK1, PCTK1, DRAK1, YSK4, ERK8, DRAK2, TTK, CDKL5, SRPK2, TRKA, SNARK, HIPK2	3		COc1ccc2[nH]c3c4[nH]c5ccc(OC)cc5c4c4C(=O)NC(=O)c4c3c2c1	Moderately soluble	3.39	61	phthalimide
G20	GSK1379710		NTRK3		1		CC(=O)c1cccc(NC(=O)NC2CCN(C2)c2ccnc(Nc3ccc(F)cc3)n2)c1	Moderately soluble	3.17	11	2-anilino-4-alkylamino-pyrimidine
G21	GSK223675		TGFBR1, ACVR1B, PRKD1		3		Cc1cccc(n1)-c1cc(Nc2ccncc2)c2ccccc2n1	Moderately soluble	3.54	14	4-amino-pyridines
G22	GSK1379712		EPHB6		1		COC(=O)C(NC(=O)NC1CCN(C1)c1ccnc(Nc2ccc(F)cc2)n1)c1ccccc1	Moderately soluble	2.89	11	2-anilino-4-alkylamino-pyrimidine
H01	GSK840		RIPK3		1		O=C(OC(C)(C)C)CC1=CC=C(N2C3=CC=C(C(NC)=O)C=C3N=C2)C=C1	Moderately soluble	3.15	62	1-aryl-benzimidazole
H02	GSK843		RIPK3		1		NC1=NC=C(C2=CC(C)=NN2C)C3=C1C(C4=CC=C(SC=N5)C5=C4)=CS3	Moderately soluble	4.02	4	fused amino-pyrimidine
H03	PFE-PKIS 3		FGFR1		1		COC1=CC(C2=CC3=CN=C(N)N=C3N=C2NC(NC(C)(C)C)=O)=CC(OC)=C1	Soluble	2.34	63	2-amino-quinazoline
H04	BI00036838		GSK3B, GSK3A, DYRK1A, CDKL5, DYRK1B, ICK, DYRK2, CDK7		8		N2c1c(cc(cc1)C(=O)C)C(=C(NN(C)C)CC)C2=O	Soluble	1.8	2	oxindole
H05	GW435821X	PKIS	IKBKE	PDGFRB, KIT, ACVRL1, BMPR1B, MEK5, EPHB6, ACVR2B, ACVR1	1		Cc1cc(O)cc(C)c1\C=C\c1cncc(c1)C(N)=O	Soluble	2.29	64	3-vinyl-pyridine
H06	GSK204919		PRKD2, PRKD1		2		COc1ccc2nc(nc(Nc3ccncc3)c2c1)-c1cccc(C)n1	Moderately soluble	3.13	14	4-amino-pyridines
H08	GSK1070916		AURKB, AURKC, FLT1, TIE2, SIK, FLT4, FGFR1		7		CCN1C=C(C(=N1)C2=CC=C(C=C2)NC(=O)N(C)C)C3=C4C=C(NC4=NC=C3)C5=CC(=CC=C5)CN(C)C	Moderately soluble	4.17	65	2,4-disub-7-azaindole
H09	GW709042A	PKIS	KDR, TEK, RET	AXL, CIT, DDR1, RET, LOK, PDGFRB, KIT, TIE1, FLT3, FLT1, PAK3, CSF1R, ZAK, TIE2, MERTK, LTK, ABL1	3		Cl.Fc1ccc(cc1NC(=O)Nc1ccc(Oc2ccc3[nH]c(NC(=O)c4ccccc4)nc3c2)cc1)C(F)(F)F	Poorly soluble	5.07	36	2-amino-6—X-Ar-benzimidazole
H10	SB-710397		BRAF		1		CN(C)CCN(C)C(=O)c1cc(c(o1)-c1ccc(Cl)c(O)c1)-c1ccncc1	Moderately soluble	3.19	6	4-Ar-pyridine
H11	SB-242719	PKIS	MAPK14	p38-alpha, CSNK1E, CIT, CSNK1D, DMPK2, p38-beta, CSNK1A1, YANK1	1		CCc1ccc(Oc2nccc(n2)-c2c(ncn2C2CCNCC2)-c2ccc(F)cc2)cc1	Moderately soluble	4.38	35	2-O or C sub-4-(ortho-aryl)-heteroaryl-pyrimidine
H12	SB-732932		MYLK2, MAPK15, CDKL2		3		O=C(Nc1n[nH]c2cc(ccc12)-c1ccsc1)C1CC1	Soluble	2.94	1	6-Ar-indazole
H13	GW693917A	PKIS	KDR, TEK, EPHA2	CDKL2, DDR1, PDGFRB, RET, EPHA8, KIT, LOK, TIE2, CIT, LCK, CSF1R, FLT3, FLT4, ABL2, FLT1, ABL1, TIE1, FLT3, TRKC, TRKA, CDK11, DDR2, TAK1, AXL, TRKB, ZAK, MERTK, ERK8, CDK7, EPHB6, MUSK, EPHA3, HIPK4, p38-beta	3		Cl.COC(=O)Nc1nc2ccc(Oc3ccc(NC(=O)Nc4cc(ccc4F)C(F)(F)F)cc3)cc2s1	Poorly soluble	4.81	66	2-amino-6-phenoxy-benzothiazole
H14	GW807982X		CLK2, CLK1, MAPK15, NEK6		4		CCOc1ccc2c(cnn2n1)-c1ccnc(Nc2cc(OC)cc(c2)C(F)(F)F)n1	Moderately soluble	3.75	7	2-anilino-4-aryl-pyrimidine
H15	GW770249X	PKIS	TEK, KDR, MUSK, NTRK1, PDGFRA, KIT	AXL, CDK11, CDK8, DDR1, HIPK4, KIT, PDGFRB, RET, FLT3, TRKC, YSK4, CSF1R, LOK, EPHB6, ABL1, FLT4, VEGFR2, EPHA8, DDR2, CDC2L5, MERTK, MUSK, PDGFRA, TRKB, PLK2, ERK8, TIE1, FLT1, TRKA, TAK1, TIE2, MKNK2, CDK7, LTK, p38-delta, EPHA4, AURKB, EPHA7, SLK, JNK2, FAK, MYO3A	6		Nc1ncnc2occ(-c3ccc(NC(=O)Nc4cc(ccc4F)C(F)(F)F)cc3)c12	Moderately soluble	3.91	4	fused amino-pyrimidine
H16	GW578748X	PKIS	IKBKE	PIP5K1C, HASPIN, TYK2, MEK5, JAK1, SGK, EPHB6, DYRK2, ABL1, YSK4, PIK4CB, RPS6KA4, RET, ULK3, RIPK4, CHEK1, DRAK1, SGK3, PDGFRA, CSNK2A2, CSNK2A1, RIOK2, BMPR2, DRAK2	1		COc1cc(\C=N\Nc2ncnc3[nH]ncc23)ccc1O	Soluble	1.36	15	hydrazinyl-pyrazolo-pyrimidine
H17	TPKI-24		PLK1, PLK3, PLK2, MYLK, DAPK3		5		COc1cc(ccc1Nc2ncc3N(C)C(=O)C(F)(F)CN(C4CCCC4)c3n2)C(=O)NC5CCN(C)CC5	Moderately soluble	2.99	5	2-amino-pyrimido-diazepin-6-one
H18	GW830900A	PKIS	AURKC	PDGFRB, KIT, CSF1R, MEK5, PDGFRA, PAK3, FLT3, PIP5K2C, AURKB, AURKC, BIKE, GRK4, SRPK3, AURKA, ROCK2, ROCK1, RIOK1	1		Cl.CN(C)CCNC(=O)Nc1ccc(cc1)N(C)c1ccnc(Nc2ccc(CS(C)(=O)=O)cc2)n1	Moderately soluble	2.19	17	2,4-dianilino-pyrimidine
H19	TPKI-16		MAP2K1		1		Cn1c2ncn(OC[C@H](O)CO)c(=O)c2c(Nc3ccc(I)cc3F)c(F)c1=O	Soluble	1.86	8	other
H20	SB-772077-B		ROCK1, ROCK2, RPS6KA5, PIM1, RSK1		5		Cl.CCn1c(nc2cncc(C(=O)N3CC[C@H](N)C3)c12)-c1nonc1N	Very soluble	-0.1	16	aminofurazan
H21	PFE-PKIS 29		PIK3CG, PIK3CA, PIK3C2G, PIK3C2B, PIK3CD, PIK3CB, MTOR, PI4KB		8		COC(N=C1)=CC=C1C2=CC3=C(C)N=C(N)N=C3N([C@H]4CC[C@H](OCCO)CC4)C2=O	Soluble	2.13	12	pyrimidopyridinone
H22	GW832467		DDR1		1		NS(=O)(=O)c1ccc(Nc2cc(n[nH]2)-c2cccc(O)c2)cc1	Soluble	1.43	67	3-amino-5-aryl-pyrazole
		40
