# Supplementary material for: The Kinase Chemogenomic Set (KCGS): An Open Science Resource for Kinase Vulnerability Identification
Source: Int J Mol Sci. 2021 Jan 8;22(2):566. doi: 10.3390/ijms22020566 (PMC7826789; doi:10.3390/ijms22020566)
Supplement: Supplementary file 1 [file ijms-22-00566-s001.zip › SI Table 6 GR values .xlsx]

## Sheet: grvalues_post_gating_corr
	well	agent	concentration	role	cell_line	barcode	timepoint	cell_count__total	G1	S	G2	S_dropout	subG1	beyondG2	cell_count	cell_count__dead	corpse_count	dead_count	fraction_dead	cell_count__time0	dead_count__time0	cell_count__ctrl	dead_count__ctrl	fraction_dead__ctrl	increase_fraction_dead	replicate	GRvalue
0	H21	AH5015	1	treatment	A375	190219_IDG_21	72	11797	0.524345	0.285915	0.139444	0.0193756	0	0.0309206	9961	1836	0	1836	0.155633	973.792	27.5583	11033.4	1064.1	0.0878714	0.0677614	1	0.942452
0	H21	AH5015	1	treatment	A375	190219_IDG_20	72	12126	0.522633	0.286755	0.142492	0.0204684	0	0.027652	10162	1964	0	1964	0.161966	973.792	27.5583	11033.4	1064.1	0.0878714	0.0740946	2	0.953564
1	H06	BI00007366	1	treatment	A375	190219_IDG_21	72	12032	0.559272	0.27473	0.114976	0.0155205	0.0190884	0.0164125	11211	821	0	821	0.0682347	973.792	27.5583	11033.4	1064.1	0.0878714	-0.0196367	1	1.00914
1	H06	BI00007366	1	treatment	A375	190219_IDG_20	72	12877	0.56505	0.277928	0.115899	0.0131331	0.0128868	0.015103	12183	694	0	694	0.0538945	973.792	27.5583	11033.4	1064.1	0.0878714	-0.0339769	2	1.05741
2	I17	BI00009348	1	treatment	A375	190219_IDG_21	72	12325	0.532881	0.280606	0.141928	0.0182055	0	0.0263793	10766	1559	0	1559	0.126491	973.792	27.5583	11033.4	1064.1	0.0878714	0.0386195	1	0.986039
2	I17	BI00009348	1	treatment	A375	190219_IDG_20	72	12654	0.554089	0.282529	0.127085	0.0124855	0	0.0238116	11213	1441	0	1441	0.113877	973.792	27.5583	11033.4	1064.1	0.0878714	0.0260056	2	1.00924
3	M18	BI00036838	1	treatment	A375	190219_IDG_21	72	2993	0.510315	0.148307	0.205138	0.0311405	0.062281	0.0428182	2569	424	0	424	0.141664	973.792	27.5583	11033.4	1064.1	0.0878714	0.0537925	1	0.319162
3	M18	BI00036838	1	treatment	A375	190219_IDG_20	72	2455	0.514135	0.127935	0.193579	0.0622904	0.0598946	0.0421658	2087	368	0	368	0.149898	973.792	27.5583	11033.4	1064.1	0.0878714	0.0620268	2	0.243169
4	K06	BI00047804	1	treatment	A375	190219_IDG_21	72	12737	0.561681	0.277715	0.118587	0.0177967	0	0.0242209	11519	1218	0	1218	0.0956269	973.792	27.5583	11033.4	1064.1	0.0878714	0.00775552	1	1.02475
4	K06	BI00047804	1	treatment	A375	190219_IDG_20	72	12020	0.527951	0.294686	0.138102	0.0187569	0	0.0205039	10876	1144	0	1144	0.0951747	973.792	27.5583	11033.4	1064.1	0.0878714	0.00730331	2	0.991812
5	G04	BI00113608	1	treatment	A375	190219_IDG_21	72	12358	0.564667	0.247019	0.118231	0.0227542	0	0.0473287	10987	1371	0	1371	0.11094	973.792	27.5583	11033.4	1064.1	0.0878714	0.0230689	1	0.997596
5	G04	BI00113608	1	treatment	A375	190219_IDG_20	72	12274	0.57553	0.271664	0.115281	0.0155336	0.00244349	0.019548	11459	815	0	815	0.0664005	973.792	27.5583	11033.4	1064.1	0.0878714	-0.0214709	2	1.02173
6	E10	BI00133844	1	treatment	A375	190219_IDG_21	72	11916	0.562918	0.248699	0.134665	0.0178439	0.0098513	0.0260223	10760	1156	0	1156	0.0970124	973.792	27.5583	11033.4	1064.1	0.0878714	0.00914103	1	0.985723
6	E10	BI00133844	1	treatment	A375	190219_IDG_20	72	11190	0.553815	0.276567	0.127773	0.0182951	0.00360062	0.0199494	10276	914	0	914	0.0816801	973.792	27.5583	11033.4	1064.1	0.0878714	-0.00619132	2	0.959797
7	H15	BI00601000	1	treatment	A375	190219_IDG_21	72	12510	0.535575	0.279588	0.131581	0.0185009	0.00786721	0.0268868	11567	943	0	943	0.0753797	973.792	27.5583	11033.4	1064.1	0.0878714	-0.0124917	1	1.02716
7	H15	BI00601000	1	treatment	A375	190219_IDG_20	72	12067	0.559815	0.264783	0.133255	0.0155327	0.00381506	0.0227995	11009	1058	0	1058	0.0876771	973.792	27.5583	11033.4	1064.1	0.0878714	-0.000194258	2	0.998737
8	C21	BI00604564	1	treatment	A375	190219_IDG_21	72	11402	0.54549	0.278752	0.126732	0.0186028	0	0.0304234	10321	1081	0	1081	0.0948079	973.792	27.5583	11033.4	1064.1	0.0878714	0.00693653	1	0.962244
8	C21	BI00604564	1	treatment	A375	190219_IDG_20	72	12171	0.554198	0.263572	0.121426	0.0173724	0.0282302	0.0152009	11052	1119	0	1119	0.0919399	973.792	27.5583	11033.4	1064.1	0.0878714	0.00406846	2	1.00096
9	L14	BI00614644	1	treatment	A375	190219_IDG_21	72	13171	0.522401	0.252572	0.145116	0.0196378	0.0114767	0.0487971	11763	1408	0	1408	0.106902	973.792	27.5583	11033.4	1064.1	0.0878714	0.0190301	1	1.0369
9	L14	BI00614644	1	treatment	A375	190219_IDG_20	72	12960	0.516496	0.284858	0.138392	0.0179719	0	0.0422816	11518	1442	0	1442	0.111265	973.792	27.5583	11033.4	1064.1	0.0878714	0.023394	2	1.0247
10	G19	BI00645435	1	treatment	A375	190219_IDG_21	72	11765	0.657391	0.211728	0.089187	0.0127798	0.0216623	0.00725097	11033	732	0	732	0.0622184	973.792	27.5583	11033.4	1064.1	0.0878714	-0.0256529	1	0.99998
10	G19	BI00645435	1	treatment	A375	190219_IDG_20	72	10691	0.607399	0.224841	0.0943715	0.013027	0.0561854	0.00417661	10056	635	0	635	0.0593958	973.792	27.5583	11033.4	1064.1	0.0878714	-0.0284756	2	0.947724
11	F21	BI00801818	1	treatment	A375	190219_IDG_21	72	11329	0.51704	0.296477	0.133257	0.0167528	0.00938158	0.0270917	10446	883	0	883	0.0779416	973.792	27.5583	11033.4	1064.1	0.0878714	-0.00992983	1	0.969001
11	F21	BI00801818	1	treatment	A375	190219_IDG_20	72	11865	0.508702	0.315078	0.130723	0.0174045	0	0.0280931	10572	1293	0	1293	0.108976	973.792	27.5583	11033.4	1064.1	0.0878714	0.0211046	2	0.975753
12	K14	BI00865461	1	treatment	A375	190219_IDG_21	72	3265	0.847208	0.0869274	0.0437981	0.00334336	0	0.0187228	2991	274	0	274	0.0839204	973.792	27.5583	11033.4	1064.1	0.0878714	-0.00395103	1	0.377713
12	K14	BI00865461	1	treatment	A375	190219_IDG_20	72	3154	0.86114	0.0846287	0.0321244	0.00241796	0	0.0196891	2895	259	0	259	0.0821179	973.792	27.5583	11033.4	1064.1	0.0878714	-0.00575345	2	0.364939
13	K21	BI01125081	1	treatment	A375	190219_IDG_21	72	12404	0.546554	0.271504	0.137661	0.015912	0	0.0283688	10998	1406	0	1406	0.113351	973.792	27.5583	11033.4	1064.1	0.0878714	0.0254791	1	0.998166
13	K21	BI01125081	1	treatment	A375	190219_IDG_20	72	12370	0.528573	0.277484	0.145503	0.0174122	0	0.0310271	10797	1573	0	1573	0.127162	973.792	27.5583	11033.4	1064.1	0.0878714	0.0392911	2	0.98767
14	K16	BI2536	1	treatment	A375	190219_IDG_21	72	804	0.274262	0.0232068	0.240506	0.135021	0	0.327004	474	330	0	330	0.410448	973.792	27.5583	11033.4	1064.1	0.0878714	0.322576	1	-0.185831
14	K16	BI2536	1	treatment	A375	190219_IDG_20	72	910	0.322457	0.0230326	0.126679	0.176583	0	0.351248	521	389	0	389	0.427473	973.792	27.5583	11033.4	1064.1	0.0878714	0.339601	2	-0.163552
15	K08	BIBF0846CL	1	treatment	A375	190219_IDG_21	72	12435	0.582032	0.266907	0.117652	0.0155305	0	0.0178781	11075	1360	0	1360	0.109369	973.792	27.5583	11033.4	1064.1	0.0878714	0.0214973	1	1.00215
15	K08	BIBF0846CL	1	treatment	A375	190219_IDG_20	72	13515	0.610398	0.236426	0.118542	0.0145607	0	0.0200724	12156	1359	0	1359	0.100555	973.792	27.5583	11033.4	1064.1	0.0878714	0.0126835	2	1.05611
16	E09	BIBW3133BS	1	treatment	A375	190219_IDG_21	72	11984	0.55364	0.253149	0.125056	0.0175971	0.0254578	0.0251005	11195	789	0	789	0.0658378	973.792	27.5583	11033.4	1064.1	0.0878714	-0.0220336	1	1.00832
16	E09	BIBW3133BS	1	treatment	A375	190219_IDG_20	72	12399	0.577217	0.245533	0.113329	0.011744	0.0346447	0.0175321	11921	478	0	478	0.0385515	973.792	27.5583	11033.4	1064.1	0.0878714	-0.0493199	2	1.04468
17	K20	BIRB0876BS	1	treatment	A375	190219_IDG_21	72	12506	0.528596	0.275809	0.13804	0.019487	0	0.0380676	11033	1473	0	1473	0.117783	973.792	27.5583	11033.4	1064.1	0.0878714	0.0299121	1	0.99998
17	K20	BIRB0876BS	1	treatment	A375	190219_IDG_20	72	12689	0.494894	0.297286	0.145151	0.0223444	0	0.0403247	11457	1232	0	1232	0.097092	973.792	27.5583	11033.4	1064.1	0.0878714	0.00922058	2	1.02163
18	F11	BIRZ0518XX	1	treatment	A375	190219_IDG_21	72	10984	0.507499	0.284678	0.153612	0.0157828	0.00715616	0.0312714	10201	783	0	783	0.0712855	973.792	27.5583	11033.4	1064.1	0.0878714	-0.0165859	1	0.955702
18	F11	BIRZ0518XX	1	treatment	A375	190219_IDG_20	72	12646	0.521586	0.269798	0.140629	0.0161137	0.0246445	0.0272296	11605	1041	0	1041	0.0823185	973.792	27.5583	11033.4	1064.1	0.0878714	-0.00555287	2	1.02905
19	F18	BMX-IN-1	1	treatment	A375	190219_IDG_21	72	11951	0.539784	0.28416	0.122462	0.0191147	0.00850558	0.025974	10934	1017	0	1017	0.0850975	973.792	27.5583	11033.4	1064.1	0.0878714	-0.00277391	1	0.994839
19	F18	BMX-IN-1	1	treatment	A375	190219_IDG_20	72	12040	0.526757	0.296577	0.133423	0.0182883	0.00297297	0.021982	11100	940	0	940	0.0780731	973.792	27.5583	11033.4	1064.1	0.0878714	-0.0097983	2	1.00344
20	F04	CA93.0	1	treatment	A375	190219_IDG_21	72	4359	0.49659	0.090766	0.271511	0.0556139	0.0508919	0.0346275	3812	547	0	547	0.125487	973.792	27.5583	11033.4	1064.1	0.0878714	0.0376161	1	0.476511
20	F04	CA93.0	1	treatment	A375	190219_IDG_20	72	3835	0.516926	0.113144	0.229338	0.0551998	0.0600793	0.0253126	3279	556	0	556	0.14498	973.792	27.5583	11033.4	1064.1	0.0878714	0.057109	2	0.414357
21	I04	CCT241533	1	treatment	A375	190219_IDG_21	72	13058	0.562404	0.255786	0.129693	0.0229727	0	0.0291445	11666	1392	0	1392	0.106601	973.792	27.5583	11033.4	1064.1	0.0878714	0.0187299	1	1.03209
21	I04	CCT241533	1	treatment	A375	190219_IDG_20	72	12316	0.55464	0.264415	0.134999	0.020227	0	0.0257185	10926	1390	0	1390	0.112861	973.792	27.5583	11033.4	1064.1	0.0878714	0.0249899	2	0.994422
22	D04	CCT244747	1	treatment	A375	190219_IDG_21	72	10018	0.640379	0.186966	0.12787	0.0140019	0.0242973	0.00648615	9713	305	0	305	0.0304452	973.792	27.5583	11033.4	1064.1	0.0878714	-0.0574262	1	0.928518
22	D04	CCT244747	1	treatment	A375	190219_IDG_20	72	9727	0.636701	0.178837	0.13702	0.0136914	0.0289747	0.00477606	9422	305	0	305	0.031356	973.792	27.5583	11033.4	1064.1	0.0878714	-0.0565154	2	0.911841
23	I18	CCT251545	1	treatment	A375	190219_IDG_21	72	10747	0.559085	0.258565	0.121748	0.0165872	0	0.0440156	9224	1523	0	1523	0.141714	973.792	27.5583	11033.4	1064.1	0.0878714	0.0538426	1	0.900281
23	I18	CCT251545	1	treatment	A375	190219_IDG_20	72	10360	0.521145	0.280589	0.146115	0.0182941	0	0.033856	8418	1942	0	1942	0.187452	973.792	27.5583	11033.4	1064.1	0.0878714	0.0995803	2	0.851309
24	F03	CCT251921	1	treatment	A375	190219_IDG_21	72	10228	0.553109	0.255843	0.130947	0.0176336	0.0179466	0.02452	9584	644	0	644	0.0629644	973.792	27.5583	11033.4	1064.1	0.0878714	-0.024907	1	0.92117
24	F03	CCT251921	1	treatment	A375	190219_IDG_20	72	9989	0.589842	0.247332	0.12452	0.0161118	0.00160051	0.0205933	9372	617	0	617	0.0617679	973.792	27.5583	11033.4	1064.1	0.0878714	-0.0261034	2	0.908938
25	L06	D2202-1	1	treatment	A375	190219_IDG_21	72	12726	0.552499	0.259893	0.122181	0.0152003	0.0283354	0.0218918	12105	621	0	621	0.0487977	973.792	27.5583	11033.4	1064.1	0.0878714	-0.0390737	1	1.05364
25	L06	D2202-1	1	treatment	A375	190219_IDG_20	72	12526	0.575402	0.246565	0.126655	0.0161546	0.00982596	0.0253976	12009	517	0	517	0.0412741	973.792	27.5583	11033.4	1064.1	0.0878714	-0.0465972	2	1.04898
26	C19	DDR1-IN-1	1	treatment	A375	190219_IDG_21	72	11720	0.572518	0.248479	0.126328	0.0144401	0	0.0382345	11011	709	0	709	0.0604949	973.792	27.5583	11033.4	1064.1	0.0878714	-0.0273765	1	0.998841
26	C19	DDR1-IN-1	1	treatment	A375	190219_IDG_20	72	12357	0.566993	0.26832	0.124794	0.0136155	0.00216807	0.0241089	11531	826	0	826	0.0668447	973.792	27.5583	11033.4	1064.1	0.0878714	-0.0210267	2	1.02535
79	C17	ERK5-IN-1	1	treatment	A375	190219_IDG_21	72	10830	0.554445	0.289014	0.11151	0.0145575	0.0137811	0.0166925	10304	526	0	526	0.0485688	973.792	27.5583	11033.4	1064.1	0.0878714	-0.0393026	1	0.961321
79	C17	ERK5-IN-1	1	treatment	A375	190219_IDG_20	72	11079	0.550094	0.25951	0.118362	0.0138418	0.0428437	0.0153484	10620	459	0	459	0.0414297	973.792	27.5583	11033.4	1064.1	0.0878714	-0.0464417	2	0.978311
80	L04	FM-381	1	treatment	A375	190219_IDG_21	72	13431	0.593853	0.240732	0.108478	0.0158767	0.0232285	0.017832	12786	645	0	645	0.0480232	973.792	27.5583	11033.4	1064.1	0.0878714	-0.0398482	1	1.08599
80	L04	FM-381	1	treatment	A375	190219_IDG_20	72	12938	0.594115	0.250973	0.107652	0.0119974	0.0243191	0.0109436	12336	602	0	602	0.0465296	973.792	27.5583	11033.4	1064.1	0.0878714	-0.0413418	2	1.06476
81	E08	GNF-5	1	treatment	A375	190219_IDG_21	72	11823	0.507105	0.283377	0.135471	0.0189791	0.0347794	0.020288	10696	1127	0	1127	0.0953227	973.792	27.5583	11033.4	1064.1	0.0878714	0.00745128	1	0.982343
81	E08	GNF-5	1	treatment	A375	190219_IDG_20	72	11797	0.537912	0.285513	0.136877	0.0150517	0	0.0246472	10630	1167	0	1167	0.0989235	973.792	27.5583	11033.4	1064.1	0.0878714	0.0110521	2	0.978842
82	F17	GR269666A	1	treatment	A375	190219_IDG_21	72	11388	0.541001	0.282483	0.130991	0.0166506	0	0.0288739	10390	998	0	998	0.0876361	973.792	27.5583	11033.4	1064.1	0.0878714	-0.000235286	1	0.965981
82	F17	GR269666A	1	treatment	A375	190219_IDG_20	72	12849	0.547381	0.27933	0.126549	0.0165769	0	0.0301632	11703	1146	0	1146	0.0891898	973.792	27.5583	11033.4	1064.1	0.0878714	0.00131843	2	1.03393
83	M21	GSK1070916	1	treatment	A375	190219_IDG_21	72	1530	0.179939	0.00689127	0.326953	0.11562	0	0.370597	1306	224	0	224	0.146405	973.792	27.5583	11033.4	1064.1	0.0878714	0.0585338	1	0.0874267
83	M21	GSK1070916	1	treatment	A375	190219_IDG_20	72	1361	0.17128	0.00346021	0.369377	0.0908304	0	0.365052	1156	205	0	205	0.150625	973.792	27.5583	11033.4	1064.1	0.0878714	0.0627531	2	0.0501963
84	C16	GSK1122999	1	treatment	A375	190219_IDG_21	72	12291	0.519463	0.269799	0.14783	0.0203132	0.0105593	0.0320358	11175	1116	0	1116	0.0907981	973.792	27.5583	11033.4	1064.1	0.0878714	0.00292675	1	1.0073
84	C16	GSK1122999	1	treatment	A375	190219_IDG_20	72	11926	0.547203	0.256112	0.128651	0.0184965	0.0248146	0.024723	10921	1005	0	1005	0.0842697	973.792	27.5583	11033.4	1064.1	0.0878714	-0.00360173	2	0.994162
85	L15	GSK114	1	treatment	A375	190219_IDG_21	72	12168	0.534297	0.265251	0.12291	0.0193403	0.0304564	0.0277451	11065	1103	0	1103	0.0906476	973.792	27.5583	11033.4	1064.1	0.0878714	0.00277621	1	1.00163
85	L15	GSK114	1	treatment	A375	190219_IDG_20	72	11789	0.574634	0.243118	0.122922	0.0185337	0.0191696	0.0216226	11007	782	0	782	0.066333	973.792	27.5583	11033.4	1064.1	0.0878714	-0.0215384	2	0.998633
86	M10	GSK1379710	1	treatment	A375	190219_IDG_21	72	11948	0.475966	0.291339	0.160226	0.0246099	0	0.0478584	9549	2399	0	2399	0.200787	973.792	27.5583	11033.4	1064.1	0.0878714	0.112915	1	0.919164
86	M10	GSK1379710	1	treatment	A375	190219_IDG_20	72	12364	0.505546	0.299935	0.13869	0.021344	0.00419424	0.0302917	10729	1635	0	1635	0.132239	973.792	27.5583	11033.4	1064.1	0.0878714	0.0443674	2	0.984087
87	M14	GSK1379712	1	treatment	A375	190219_IDG_21	72	11776	0.511524	0.276069	0.155549	0.0188852	0	0.0379734	9849	1927	0	1927	0.163638	973.792	27.5583	11033.4	1064.1	0.0878714	0.0757665	1	0.93619
87	M14	GSK1379712	1	treatment	A375	190219_IDG_20	72	12514	0.512079	0.267416	0.148127	0.0250936	0	0.0472846	10680	1834	0	1834	0.146556	973.792	27.5583	11033.4	1064.1	0.0878714	0.0586845	2	0.981496
88	H19	GSK1379761	1	treatment	A375	190219_IDG_21	72	11413	0.487504	0.301606	0.148357	0.0190365	0	0.0434968	9403	2010	0	2010	0.176115	973.792	27.5583	11033.4	1064.1	0.0878714	0.0882436	1	0.910739
88	H19	GSK1379761	1	treatment	A375	190219_IDG_20	72	11966	0.516608	0.301139	0.141476	0.0177084	0	0.0230688	10447	1519	0	1519	0.126943	973.792	27.5583	11033.4	1064.1	0.0878714	0.0390716	2	0.969055
89	H07	GSK1379762	1	treatment	A375	190219_IDG_21	72	12148	0.560557	0.27787	0.120588	0.012523	0.00560469	0.0228566	11419	729	0	729	0.0600099	973.792	27.5583	11033.4	1064.1	0.0878714	-0.0278615	1	1.01971
89	H07	GSK1379762	1	treatment	A375	190219_IDG_20	72	11669	0.552359	0.285387	0.123317	0.0177737	0	0.0211635	10915	754	0	754	0.0646156	973.792	27.5583	11033.4	1064.1	0.0878714	-0.0232557	2	0.993849
90	H22	GSK1392956A	1	treatment	A375	190219_IDG_21	72	11879	0.527854	0.276265	0.135522	0.0205941	0	0.0397646	10537	1342	0	1342	0.112972	973.792	27.5583	11033.4	1064.1	0.0878714	0.0251011	1	0.973883
90	H22	GSK1392956A	1	treatment	A375	190219_IDG_20	72	11856	0.550313	0.270918	0.132418	0.0140066	0.00368596	0.0286583	10852	1004	0	1004	0.0846829	973.792	27.5583	11033.4	1064.1	0.0878714	-0.00318853	2	0.990556
91	H08	GSK1398477	1	treatment	A375	190219_IDG_21	72	11410	0.566439	0.267418	0.122159	0.0158936	0.00729994	0.020791	10822	588	0	588	0.0515337	973.792	27.5583	11033.4	1064.1	0.0878714	-0.0363377	1	0.988983
91	H08	GSK1398477	1	treatment	A375	190219_IDG_20	72	10991	0.549559	0.294319	0.11714	0.0156709	0.00352595	0.0197845	10210	781	0	781	0.0710581	973.792	27.5583	11033.4	1064.1	0.0878714	-0.0168133	2	0.956195
92	J17	GSK1838705	1	treatment	A375	190219_IDG_21	72	7240	0.503196	0.305922	0.13464	0.0139185	0.0143446	0.027979	7041	199	0	199	0.0274862	973.792	27.5583	11033.4	1064.1	0.0878714	-0.0603852	1	0.759252
92	J17	GSK1838705	1	treatment	A375	190219_IDG_20	72	7467	0.525222	0.280349	0.131652	0.0156596	0.0217572	0.0253603	7216	251	0	251	0.0336146	973.792	27.5583	11033.4	1064.1	0.0878714	-0.0542568	2	0.771629
93	L13	GSK1904529	1	treatment	A375	190219_IDG_21	72	12690	0.524589	0.261517	0.152651	0.0244059	0	0.0368373	10940	1750	0	1750	0.137904	973.792	27.5583	11033.4	1064.1	0.0878714	0.0500325	1	0.995152
93	L13	GSK1904529	1	treatment	A375	190219_IDG_20	72	12499	0.540835	0.260708	0.140653	0.019873	0.00544465	0.0324864	11020	1479	0	1479	0.118329	973.792	27.5583	11033.4	1064.1	0.0878714	0.0304581	2	0.999307
94	G05	GSK190937	1	treatment	A375	190219_IDG_21	72	12667	0.578992	0.258887	0.116102	0.0153677	0.00692392	0.0237271	11843	824	0	824	0.0650509	973.792	27.5583	11033.4	1064.1	0.0878714	-0.0228205	1	1.04085
94	G05	GSK190937	1	treatment	A375	190219_IDG_20	72	10982	0.564679	0.279458	0.127053	0.0115241	0.00240085	0.0148852	10413	569	0	569	0.0518121	973.792	27.5583	11033.4	1064.1	0.0878714	-0.0360593	2	0.967223
95	D18	GSK200398A	1	treatment	A375	190219_IDG_21	72	10548	0.562639	0.262093	0.121736	0.0179114	0.00769075	0.0279296	9882	666	0	666	0.0631399	973.792	27.5583	11033.4	1064.1	0.0878714	-0.0247315	1	0.938041
95	D18	GSK200398A	1	treatment	A375	190219_IDG_20	72	10102	0.5724	0.255287	0.123543	0.0155373	0	0.0332326	9268	834	0	834	0.0825579	973.792	27.5583	11033.4	1064.1	0.0878714	-0.00531349	2	0.902865
96	F12	GSK204607	1	treatment	A375	190219_IDG_21	72	11674	0.502914	0.281056	0.1398	0.0175774	0.0370674	0.0215847	10980	694	0	694	0.0594483	973.792	27.5583	11033.4	1064.1	0.0878714	-0.028423	1	0.997232
96	F12	GSK204607	1	treatment	A375	190219_IDG_20	72	12951	0.549339	0.26047	0.128676	0.0142412	0.0239319	0.023342	11867	1084	0	1084	0.0837001	973.792	27.5583	11033.4	1064.1	0.0878714	-0.00417129	2	1.04203
97	M20	GSK204919	1	treatment	A375	190219_IDG_21	72	12725	0.458757	0.321558	0.149874	0.0243266	0	0.0454842	10729	1996	0	1996	0.156857	973.792	27.5583	11033.4	1064.1	0.0878714	0.0689852	1	0.984087
97	M20	GSK204919	1	treatment	A375	190219_IDG_20	72	13062	0.420342	0.317027	0.185098	0.0419303	0	0.035603	10589	2473	0	2473	0.189328	973.792	27.5583	11033.4	1064.1	0.0878714	0.101456	2	0.97666
98	M08	GSK2219385	1	treatment	A375	190219_IDG_21	72	12099	0.53289	0.282481	0.134451	0.0230184	0	0.0271598	10383	1716	0	1716	0.14183	973.792	27.5583	11033.4	1064.1	0.0878714	0.0539585	1	0.965603
98	M08	GSK2219385	1	treatment	A375	190219_IDG_20	72	11882	0.546442	0.283071	0.129522	0.0183191	0.00285372	0.019792	10863	1019	0	1019	0.08576	973.792	27.5583	11033.4	1064.1	0.0878714	-0.00211142	2	0.991132
99	M11	GSK223675	1	treatment	A375	190219_IDG_21	72	12732	0.431173	0.315879	0.162563	0.0300028	0	0.0603831	10599	2133	0	2133	0.167531	973.792	27.5583	11033.4	1064.1	0.0878714	0.0796592	1	0.977193
99	M11	GSK223675	1	treatment	A375	190219_IDG_20	72	13765	0.426896	0.324646	0.162627	0.0255408	0	0.0602902	11511	2254	0	2254	0.163749	973.792	27.5583	11033.4	1064.1	0.0878714	0.0758772	2	1.02435
100	L08	GSK2250882	1	treatment	A375	190219_IDG_21	72	13631	0.495127	0.263697	0.128491	0.0219474	0.0592089	0.0315289	12211	1420	0	1420	0.104174	973.792	27.5583	11033.4	1064.1	0.0878714	0.0163029	1	1.05876
100	L08	GSK2250882	1	treatment	A375	190219_IDG_20	72	13080	0.534987	0.271244	0.123383	0.0197808	0.0221709	0.0284348	12133	947	0	947	0.0724006	973.792	27.5583	11033.4	1064.1	0.0878714	-0.0154708	2	1.055
101	I05	GSK2269557	1	treatment	A375	190219_IDG_21	72	10993	0.548978	0.273043	0.117721	0.0169688	0.0183185	0.0249711	10372	621	0	621	0.0564905	973.792	27.5583	11033.4	1064.1	0.0878714	-0.0313809	1	0.965008
101	I05	GSK2269557	1	treatment	A375	190219_IDG_20	72	11508	0.56136	0.273632	0.126774	0.0139119	0.00340888	0.0209139	10854	654	0	654	0.05683	973.792	27.5583	11033.4	1064.1	0.0878714	-0.0310414	2	0.990661
102	D14	GSK2283293	1	treatment	A375	190219_IDG_21	72	12584	0.543033	0.264451	0.129228	0.0165282	0.00847821	0.0382804	11677	907	0	907	0.0720757	973.792	27.5583	11033.4	1064.1	0.0878714	-0.0157957	1	1.03264
102	D14	GSK2283293	1	treatment	A375	190219_IDG_20	72	11349	0.516988	0.262306	0.144282	0.0151529	0.0416	0.0196706	10625	724	0	724	0.0637942	973.792	27.5583	11033.4	1064.1	0.0878714	-0.0240772	2	0.978577
103	I10	GSK2288359	1	treatment	A375	190219_IDG_21	72	12364	0.543406	0.265864	0.141714	0.0185764	0	0.0304396	10874	1490	0	1490	0.120511	973.792	27.5583	11033.4	1064.1	0.0878714	0.0326398	1	0.991707
103	I10	GSK2288359	1	treatment	A375	190219_IDG_20	72	11889	0.526977	0.301395	0.129023	0.0163721	0	0.0262326	10750	1139	0	1139	0.0958028	973.792	27.5583	11033.4	1064.1	0.0878714	0.00793145	2	0.985196
104	I06	GSK2292767	1	treatment	A375	190219_IDG_21	72	9053	0.536009	0.258601	0.13039	0.0172018	0.0392202	0.018578	8720	333	0	333	0.0367834	973.792	27.5583	11033.4	1064.1	0.0878714	-0.051088	1	0.870036
104	I06	GSK2292767	1	treatment	A375	190219_IDG_20	72	9090	0.553762	0.260735	0.125157	0.014428	0.0328638	0.0130539	8733	357	0	357	0.0392739	973.792	27.5583	11033.4	1064.1	0.0878714	-0.0485975	2	0.870831
105	C09	GSK2297428	1	treatment	A375	190219_IDG_21	72	12278	0.536261	0.272	0.12487	0.0145217	0.0186087	0.0337391	11500	778	0	778	0.0633654	973.792	27.5583	11033.4	1064.1	0.0878714	-0.024506	1	1.0238
105	C09	GSK2297428	1	treatment	A375	190219_IDG_20	72	11521	0.529778	0.264934	0.131204	0.0140769	0.043133	0.0168742	11082	439	0	439	0.0381043	973.792	27.5583	11033.4	1064.1	0.0878714	-0.0497671	2	1.00251
106	I09	GSK2298859	1	treatment	A375	190219_IDG_21	72	11885	0.547253	0.28441	0.129139	0.0153929	0	0.0238053	11174	711	0	711	0.0598233	973.792	27.5583	11033.4	1064.1	0.0878714	-0.0280481	1	1.00725
106	I09	GSK2298859	1	treatment	A375	190219_IDG_20	72	11147	0.528267	0.296731	0.130856	0.0141567	0.0170439	0.0129459	10737	410	0	410	0.0367812	973.792	27.5583	11033.4	1064.1	0.0878714	-0.0510902	2	0.98451
107	G09	GSK2328680	1	treatment	A375	190219_IDG_21	72	11828	0.558126	0.257531	0.13854	0.017471	0	0.0283313	10589	1239	0	1239	0.104751	973.792	27.5583	11033.4	1064.1	0.0878714	0.01688	1	0.97666
107	G09	GSK2328680	1	treatment	A375	190219_IDG_20	72	11611	0.559591	0.261909	0.129053	0.0136751	0.014309	0.0214635	11042	569	0	569	0.0490053	973.792	27.5583	11033.4	1064.1	0.0878714	-0.0388661	2	1.00045
108	J21	GSK2334470	1	treatment	A375	190219_IDG_21	72	10558	0.543858	0.301133	0.12223	0.0126621	0	0.0201164	9793	765	0	765	0.0724569	973.792	27.5583	11033.4	1064.1	0.0878714	-0.0154145	1	0.93304
108	J21	GSK2334470	1	treatment	A375	190219_IDG_20	72	11119	0.535859	0.303112	0.130485	0.0163348	0.00309298	0.0111154	10346	773	0	773	0.0695206	973.792	27.5583	11033.4	1064.1	0.0878714	-0.0183508	2	0.9636
109	C04	GSK2336394	1	treatment	A375	190219_IDG_21	72	11395	0.556904	0.249743	0.120904	0.017552	0.0362244	0.0186724	10711	684	0	684	0.0600263	973.792	27.5583	11033.4	1064.1	0.0878714	-0.0278451	1	0.983136
109	C04	GSK2336394	1	treatment	A375	190219_IDG_20	72	10929	0.585238	0.262495	0.122433	0.0128826	0	0.0169508	10324	605	0	605	0.0553573	973.792	27.5583	11033.4	1064.1	0.0878714	-0.0325141	2	0.962407
110	C05	GSK2373690	1	treatment	A375	190219_IDG_21	72	11088	0.50088	0.277147	0.138525	0.015359	0.0448053	0.0232831	10222	866	0	866	0.0781025	973.792	27.5583	11033.4	1064.1	0.0878714	-0.00976894	1	0.956851
110	C05	GSK2373690	1	treatment	A375	190219_IDG_20	72	11348	0.568561	0.284004	0.113178	0.0128925	0.00810388	0.0132609	10859	489	0	489	0.0430913	973.792	27.5583	11033.4	1064.1	0.0878714	-0.0447801	2	0.990923
111	G17	GSK2376236	1	treatment	A375	190219_IDG_21	72	11856	0.529937	0.299911	0.127435	0.0145666	0.00607685	0.0220733	11190	666	0	666	0.0561741	973.792	27.5583	11033.4	1064.1	0.0878714	-0.0316973	1	1.00807
111	G17	GSK2376236	1	treatment	A375	190219_IDG_20	72	11141	0.524665	0.30263	0.130207	0.0149771	0.0115136	0.0160067	10683	458	0	458	0.0411094	973.792	27.5583	11033.4	1064.1	0.0878714	-0.046762	2	0.981655
112	F08	GSK237701A	1	treatment	A375	190219_IDG_21	72	340	0.257576	0.020202	0.29798	0.171717	0	0.252525	198	142	0	142	0.417647	973.792	27.5583	11033.4	1064.1	0.0878714	0.329776	1	-0.365455
112	F08	GSK237701A	1	treatment	A375	190219_IDG_20	72	475	0.206897	0.0103448	0.42069	0.189655	0	0.172414	290	185	0	185	0.389474	973.792	27.5583	11033.4	1064.1	0.0878714	0.301602	2	-0.292403
113	J19	GSK2578215	1	treatment	A375	190219_IDG_21	72	12201	0.53936	0.271854	0.13869	0.0181176	0	0.0319775	11039	1162	0	1162	0.0952381	973.792	27.5583	11033.4	1064.1	0.0878714	0.0073667	1	1.00029
113	J19	GSK2578215	1	treatment	A375	190219_IDG_20	72	11236	0.520371	0.29407	0.145724	0.0180516	0	0.021783	9916	1320	0	1320	0.11748	973.792	27.5583	11033.4	1064.1	0.0878714	0.0296081	2	0.939942
114	L07	GSK2606414	1	treatment	A375	190219_IDG_21	72	12521	0.578713	0.220499	0.129231	0.0183392	0.0231382	0.0300797	11669	852	0	852	0.0680457	973.792	27.5583	11033.4	1064.1	0.0878714	-0.0198257	1	1.03224
114	L07	GSK2606414	1	treatment	A375	190219_IDG_20	72	13018	0.586193	0.234445	0.125578	0.0141154	0.0144398	0.0252292	12327	691	0	691	0.0530804	973.792	27.5583	11033.4	1064.1	0.0878714	-0.034791	2	1.06433
115	F07	GSK2656157	1	treatment	A375	190219_IDG_21	72	12240	0.569142	0.248356	0.128332	0.0141918	0.0172205	0.0227587	11556	684	0	684	0.0558824	973.792	27.5583	11033.4	1064.1	0.0878714	-0.031989	1	1.0266
115	F07	GSK2656157	1	treatment	A375	190219_IDG_20	72	12352	0.578129	0.257925	0.12473	0.0156344	0	0.0235812	11577	775	0	775	0.0627429	973.792	27.5583	11033.4	1064.1	0.0878714	-0.0251285	2	1.02766
116	C08	GSK270822A	1	treatment	A375	190219_IDG_21	72	12017	0.631801	0.231406	0.103247	0.0130407	0.00764457	0.0128609	11119	898	0	898	0.0747275	973.792	27.5583	11033.4	1064.1	0.0878714	-0.0131439	1	1.00442
116	C08	GSK270822A	1	treatment	A375	190219_IDG_20	72	11251	0.610529	0.23889	0.102368	0.0125484	0.0288706	0.00679309	10599	652	0	652	0.0579504	973.792	27.5583	11033.4	1064.1	0.0878714	-0.029921	2	0.977193
117	G21	GSK2850163	1	treatment	A375	190219_IDG_21	72	11185	0.535481	0.270041	0.136605	0.0201431	0	0.0377301	9780	1405	0	1405	0.125615	973.792	27.5583	11033.4	1064.1	0.0878714	0.0377433	1	0.932307
117	G21	GSK2850163	1	treatment	A375	190219_IDG_20	72	12377	0.544225	0.267019	0.142725	0.0189868	0	0.0270445	10797	1580	0	1580	0.127656	973.792	27.5583	11033.4	1064.1	0.0878714	0.0397847	2	0.98767
118	G20	GSK299115A	1	treatment	A375	190219_IDG_21	72	13167	0.597957	0.243934	0.117412	0.0166028	0	0.0240954	11745	1422	0	1422	0.107997	973.792	27.5583	11033.4	1064.1	0.0878714	0.0201259	1	1.03601
118	G20	GSK299115A	1	treatment	A375	190219_IDG_20	72	12251	0.594663	0.260401	0.112319	0.0128493	0	0.0197682	11129	1122	0	1122	0.0915844	973.792	27.5583	11033.4	1064.1	0.0878714	0.00371297	2	1.00493
119	D11	GSK312879	1	treatment	A375	190219_IDG_21	72	11816	0.539305	0.272998	0.130366	0.0209998	0.00975655	0.026575	10762	1054	0	1054	0.0892011	973.792	27.5583	11033.4	1064.1	0.0878714	0.00132969	1	0.985828
119	D11	GSK312879	1	treatment	A375	190219_IDG_20	72	12199	0.520041	0.267115	0.138026	0.0188888	0.0298535	0.0260757	10853	1346	0	1346	0.110337	973.792	27.5583	11033.4	1064.1	0.0878714	0.0224655	2	0.990608
120	D12	GSK336313	1	treatment	A375	190219_IDG_21	72	12496	0.536112	0.268415	0.134028	0.0177866	0.0106899	0.032968	11132	1364	0	1364	0.109155	973.792	27.5583	11033.4	1064.1	0.0878714	0.0212835	1	1.00509
120	D12	GSK336313	1	treatment	A375	190219_IDG_20	72	12648	0.55455	0.26686	0.130101	0.0157931	0.00264641	0.0300495	11714	934	0	934	0.0738457	973.792	27.5583	11033.4	1064.1	0.0878714	-0.0140257	2	1.03448
121	D17	GSK461364	1	treatment	A375	190219_IDG_21	72	672	0.167076	0.00737101	0.425061	0.137592	0	0.262899	407	265	0	265	0.394345	973.792	27.5583	11033.4	1064.1	0.0878714	0.306474	1	-0.220499
121	D17	GSK461364	1	treatment	A375	190219_IDG_20	72	535	0.215625	0.025	0.35625	0.16875	0	0.234375	320	215	0	215	0.401869	973.792	27.5583	11033.4	1064.1	0.0878714	0.313998	2	-0.272232
122	L10	GSK481	1	treatment	A375	190219_IDG_21	72	13603	0.538944	0.244989	0.145348	0.0168649	0.0112433	0.0426104	12274	1329	0	1329	0.097699	973.792	27.5583	11033.4	1064.1	0.0878714	0.00982764	1	1.06179
122	L10	GSK481	1	treatment	A375	190219_IDG_20	72	13281	0.53016	0.252742	0.134845	0.0203556	0.0265038	0.0353938	12036	1245	0	1245	0.0937429	973.792	27.5583	11033.4	1064.1	0.0878714	0.00587155	2	1.05029
123	I08	GSK579289A	1	treatment	A375	190219_IDG_21	72	459	0.198606	0.0174216	0.358885	0.264808	0	0.160279	287	172	0	172	0.374728	973.792	27.5583	11033.4	1064.1	0.0878714	0.286856	1	-0.294501
123	I08	GSK579289A	1	treatment	A375	190219_IDG_20	72	482	0.190635	0.0200669	0.428094	0.183946	0	0.177258	299	183	0	183	0.379668	973.792	27.5583	11033.4	1064.1	0.0878714	0.291797	2	-0.286201
124	D22	GSK583	1	treatment	A375	190219_IDG_21	72	11332	0.560336	0.259849	0.133836	0.0154536	0.00810837	0.0224172	10483	849	0	849	0.0749206	973.792	27.5583	11033.4	1064.1	0.0878714	-0.0129508	1	0.97099
124	D22	GSK583	1	treatment	A375	190219_IDG_20	72	12302	0.548614	0.259303	0.122036	0.0183327	0.0322875	0.0194272	10964	1338	0	1338	0.108763	973.792	27.5583	11033.4	1064.1	0.0878714	0.0208914	2	0.996401
125	M15	GSK840	1	treatment	A375	190219_IDG_21	72	12385	0.510598	0.283437	0.146033	0.0215719	0	0.0383605	10662	1723	0	1723	0.13912	973.792	27.5583	11033.4	1064.1	0.0878714	0.0512485	1	0.980542
125	M15	GSK840	1	treatment	A375	190219_IDG_20	72	12106	0.47512	0.288317	0.144476	0.023475	0.0433246	0.0252878	11033	1073	0	1073	0.0886337	973.792	27.5583	11033.4	1064.1	0.0878714	0.000762341	2	0.99998
126	M16	GSK843	1	treatment	A375	190219_IDG_21	72	12195	0.550332	0.274797	0.12583	0.0172382	0	0.0318031	10848	1347	0	1347	0.110455	973.792	27.5583	11033.4	1064.1	0.0878714	0.0225837	1	0.990346
126	M16	GSK843	1	treatment	A375	190219_IDG_20	72	11675	0.534221	0.280518	0.124789	0.0182824	0.0235327	0.0186574	10666	1009	0	1009	0.086424	973.792	27.5583	11033.4	1064.1	0.0878714	-0.00144741	2	0.980754
127	J18	GSK872	1	treatment	A375	190219_IDG_21	72	12180	0.533944	0.291577	0.132364	0.0152658	0	0.0268499	11136	1044	0	1044	0.0857143	973.792	27.5583	11033.4	1064.1	0.0878714	-0.00215711	1	1.00529
127	J18	GSK872	1	treatment	A375	190219_IDG_20	72	11666	0.534655	0.295562	0.1305	0.0169972	0	0.0222852	10590	1076	0	1076	0.0922338	973.792	27.5583	11033.4	1064.1	0.0878714	0.00436245	2	0.976713
128	G18	GSK949675	1	treatment	A375	190219_IDG_21	72	11826	0.492565	0.297899	0.146983	0.0165979	0	0.0459561	10423	1403	0	1403	0.118637	973.792	27.5583	11033.4	1064.1	0.0878714	0.0307655	1	0.967762
128	G18	GSK949675	1	treatment	A375	190219_IDG_20	72	11624	0.509571	0.304364	0.14108	0.0152182	0.00459418	0.0251723	10448	1176	0	1176	0.10117	973.792	27.5583	11033.4	1064.1	0.0878714	0.0132986	2	0.969108
129	F06	GW276655	1	treatment	A375	190219_IDG_21	72	10493	0.530395	0.307134	0.117003	0.0155208	0.020396	0.00955129	10051	442	0	442	0.0421233	973.792	27.5583	11033.4	1064.1	0.0878714	-0.0457481	1	0.947447
129	F06	GW276655	1	treatment	A375	190219_IDG_20	72	11348	0.527181	0.287876	0.111526	0.0149449	0.0481039	0.010368	10706	642	0	642	0.0565738	973.792	27.5583	11033.4	1064.1	0.0878714	-0.0312975	2	0.982872
130	L03	GW280670X	1	treatment	A375	190219_IDG_21	72	11541	0.544203	0.270208	0.126374	0.0181986	0.0171824	0.0238337	10825	716	0	716	0.0620397	973.792	27.5583	11033.4	1064.1	0.0878714	-0.0258317	1	0.989141
130	L03	GW280670X	1	treatment	A375	190219_IDG_20	72	11646	0.525537	0.27556	0.13915	0.0146185	0.0248515	0.0202832	10945	701	0	701	0.0601923	973.792	27.5583	11033.4	1064.1	0.0878714	-0.0276791	2	0.995412
131	I07	GW282449A	1	treatment	A375	190219_IDG_21	72	11459	0.527179	0.28866	0.132521	0.0186504	0.00674789	0.0262418	10670	789	0	789	0.0688542	973.792	27.5583	11033.4	1064.1	0.0878714	-0.0190172	1	0.980966
131	I07	GW282449A	1	treatment	A375	190219_IDG_20	72	11133	0.539811	0.270562	0.141893	0.0156616	0.0138798	0.0181938	10663	470	0	470	0.0422168	973.792	27.5583	11033.4	1064.1	0.0878714	-0.0456546	2	0.980595
132	J22	GW282974X	1	treatment	A375	190219_IDG_21	72	11533	0.546875	0.279072	0.124716	0.0178977	0.00719697	0.0242424	10560	973	0	973	0.0843666	973.792	27.5583	11033.4	1064.1	0.0878714	-0.00350479	1	0.975113
132	J22	GW282974X	1	treatment	A375	190219_IDG_20	72	12119	0.550229	0.273742	0.125252	0.0170174	0	0.0337603	10930	1189	0	1189	0.0981104	973.792	27.5583	11033.4	1064.1	0.0878714	0.010239	2	0.994631
133	M09	GW296115X	1	treatment	A375	190219_IDG_21	72	12586	0.712289	0.157335	0.081237	0.0128032	0.0339915	0.00234424	11091	1495	0	1495	0.118783	973.792	27.5583	11033.4	1064.1	0.0878714	0.0309114	1	1.00298
133	M09	GW296115X	1	treatment	A375	190219_IDG_20	72	12840	0.631588	0.191471	0.0773794	0.00997335	0.0876107	0.00197747	11631	1209	0	1209	0.0941589	973.792	27.5583	11033.4	1064.1	0.0878714	0.00628748	2	1.03035
134	F15	GW300657X	1	treatment	A375	190219_IDG_21	72	12450	0.511857	0.284832	0.141655	0.0221029	0	0.0395526	11175	1275	0	1275	0.10241	973.792	27.5583	11033.4	1064.1	0.0878714	0.0145382	1	1.0073
134	F15	GW300657X	1	treatment	A375	190219_IDG_20	72	12340	0.561098	0.256401	0.139149	0.0167756	0	0.026576	11326	1014	0	1014	0.0821718	973.792	27.5583	11033.4	1064.1	0.0878714	-0.0056996	2	1.015
135	C15	GW300660X	1	treatment	A375	190219_IDG_21	72	11970	0.539176	0.279347	0.129586	0.0184855	0.00806981	0.0253355	10657	1313	0	1313	0.109691	973.792	27.5583	11033.4	1064.1	0.0878714	0.0218195	1	0.980276
135	C15	GW300660X	1	treatment	A375	190219_IDG_20	72	12623	0.552972	0.259262	0.140911	0.016833	0.00329718	0.0267245	11525	1098	0	1098	0.0869841	973.792	27.5583	11033.4	1064.1	0.0878714	-0.000887318	2	1.02505
136	H03	GW305074X (also GW5074)	1	treatment	A375	190219_IDG_21	72	10761	0.564418	0.278423	0.115067	0.0166208	0.00609756	0.0193745	10168	593	0	593	0.0551064	973.792	27.5583	11033.4	1064.1	0.0878714	-0.032765	1	0.953894
136	H03	GW305074X (also GW5074)	1	treatment	A375	190219_IDG_20	72	11213	0.564748	0.257771	0.116912	0.0143675	0.0329608	0.0132407	10649	564	0	564	0.0502988	973.792	27.5583	11033.4	1064.1	0.0878714	-0.0375726	2	0.979852
137	E05	GW335962X	1	treatment	A375	190219_IDG_21	72	12540	0.590209	0.247782	0.115063	0.0153138	0.0140586	0.0175732	11950	590	0	590	0.0470494	973.792	27.5583	11033.4	1064.1	0.0878714	-0.040822	1	1.0461
137	E05	GW335962X	1	treatment	A375	190219_IDG_20	72	12392	0.616494	0.238601	0.114421	0.0142487	0.00198618	0.0142487	11580	812	0	812	0.0655261	973.792	27.5583	11033.4	1064.1	0.0878714	-0.0223452	2	1.02781
138	C12	GW406108X	1	treatment	A375	190219_IDG_21	72	11749	0.521021	0.293019	0.138639	0.0170121	0	0.030309	10228	1521	0	1521	0.129458	973.792	27.5583	11033.4	1064.1	0.0878714	0.0415864	1	0.957179
138	C12	GW406108X	1	treatment	A375	190219_IDG_20	72	12115	0.543956	0.263106	0.132859	0.017024	0.0252207	0.0178346	11102	1013	0	1013	0.0836154	973.792	27.5583	11033.4	1064.1	0.0878714	-0.00425604	2	1.00354
139	E17	GW412617	1	treatment	A375	190219_IDG_21	72	12047	0.541267	0.275023	0.134208	0.0176471	0	0.0318552	11050	997	0	997	0.0827592	973.792	27.5583	11033.4	1064.1	0.0878714	-0.0051122	1	1.00086
139	E17	GW412617	1	treatment	A375	190219_IDG_20	72	12277	0.569547	0.26106	0.127044	0.0137717	0.00189361	0.0266827	11618	659	0	659	0.0536776	973.792	27.5583	11033.4	1064.1	0.0878714	-0.0341938	2	1.0297
140	D06	GW416981X	1	treatment	A375	190219_IDG_21	72	10085	0.497651	0.299467	0.139292	0.0198392	0.0259998	0.0177509	9577	508	0	508	0.0503718	973.792	27.5583	11033.4	1064.1	0.0878714	-0.0374996	1	0.920769
140	D06	GW416981X	1	treatment	A375	190219_IDG_20	72	9086	0.518651	0.299678	0.123302	0.0202625	0.0176146	0.0204927	8686	400	0	400	0.0440238	973.792	27.5583	11033.4	1064.1	0.0878714	-0.0438476	2	0.867951
141	G06	GW429374	1	treatment	A375	190219_IDG_21	72	12313	0.577939	0.278595	0.113229	0.0141869	0	0.0160489	11278	1035	0	1035	0.0840575	973.792	27.5583	11033.4	1064.1	0.0878714	-0.00381389	1	1.01256
141	G06	GW429374	1	treatment	A375	190219_IDG_20	72	12653	0.560114	0.284736	0.113126	0.0128666	0.015373	0.0137856	11969	684	0	684	0.0540583	973.792	27.5583	11033.4	1064.1	0.0878714	-0.0338131	2	1.04703
142	G07	GW429374A	1	treatment	A375	190219_IDG_21	72	12154	0.576711	0.2528	0.122311	0.0180444	0	0.0301333	11250	904	0	904	0.0743788	973.792	27.5583	11033.4	1064.1	0.0878714	-0.0134926	1	1.01113
142	G07	GW429374A	1	treatment	A375	190219_IDG_20	72	11807	0.539283	0.256323	0.139731	0.015157	0.0309417	0.018565	11150	657	0	657	0.055645	973.792	27.5583	11033.4	1064.1	0.0878714	-0.0322264	2	1.00601
143	K05	GW434756X	1	treatment	A375	190219_IDG_21	72	13185	0.572892	0.250434	0.122409	0.0185843	0	0.0356818	12107	1078	0	1078	0.0817596	973.792	27.5583	11033.4	1064.1	0.0878714	-0.00611182	1	1.05374
143	K05	GW434756X	1	treatment	A375	190219_IDG_20	72	12177	0.570081	0.252639	0.129175	0.016958	0.0121128	0.0190344	11558	619	0	619	0.0508335	973.792	27.5583	11033.4	1064.1	0.0878714	-0.0370379	2	1.0267
144	M19	GW435821X	1	treatment	A375	190219_IDG_21	72	9830	0.534695	0.252162	0.13997	0.0157804	0.0319931	0.0253999	9252	578	0	578	0.0587996	973.792	27.5583	11033.4	1064.1	0.0878714	-0.0290718	1	0.901927
144	M19	GW435821X	1	treatment	A375	190219_IDG_20	72	11586	0.549099	0.248314	0.136074	0.0199538	0.0174596	0.0290993	10825	761	0	761	0.0656827	973.792	27.5583	11033.4	1064.1	0.0878714	-0.0221887	2	0.989141
145	H17	GW440135	1	treatment	A375	190219_IDG_21	72	11270	0.536039	0.257094	0.140182	0.016364	0.00908059	0.041241	10572	698	0	698	0.0619343	973.792	27.5583	11033.4	1064.1	0.0878714	-0.0259371	1	0.975753
145	H17	GW440135	1	treatment	A375	190219_IDG_20	72	10783	0.525402	0.281802	0.145366	0.0143878	0.00277833	0.0302639	10078	705	0	705	0.0653807	973.792	27.5583	11033.4	1064.1	0.0878714	-0.0224907	2	0.94894
146	G08	GW440146	1	treatment	A375	190219_IDG_21	72	7861	0.484465	0.263235	0.173623	0.0198693	0.0313375	0.0274703	7499	362	0	362	0.0460501	973.792	27.5583	11033.4	1064.1	0.0878714	-0.0418213	1	0.791196
146	G08	GW440146	1	treatment	A375	190219_IDG_20	72	8208	0.528151	0.258052	0.148745	0.0194015	0.0188942	0.0267563	7886	322	0	322	0.03923	973.792	27.5583	11033.4	1064.1	0.0878714	-0.0486414	2	0.817118
147	H18	GW442130X	1	treatment	A375	190219_IDG_21	72	11265	0.541353	0.275014	0.130229	0.0164835	0.00857914	0.0283401	10374	891	0	891	0.0790945	973.792	27.5583	11033.4	1064.1	0.0878714	-0.00877685	1	0.965116
147	H18	GW442130X	1	treatment	A375	190219_IDG_20	72	12100	0.534621	0.27087	0.152815	0.0159009	0	0.0257927	10817	1283	0	1283	0.106033	973.792	27.5583	11033.4	1064.1	0.0878714	0.0181617	2	0.988721
148	E16	GW513184X	1	treatment	A375	190219_IDG_21	72	12454	0.557876	0.288221	0.112318	0.0175439	0	0.0240416	10773	1681	0	1681	0.134977	973.792	27.5583	11033.4	1064.1	0.0878714	0.0471053	1	0.986407
148	E16	GW513184X	1	treatment	A375	190219_IDG_20	72	12730	0.569957	0.271727	0.126882	0.0141763	0	0.0172581	11357	1373	0	1373	0.107855	973.792	27.5583	11033.4	1064.1	0.0878714	0.0199841	2	1.01658
149	J08	GW525701	1	treatment	A375	190219_IDG_21	72	452	0.123077	0.00923077	0.332308	0.0923077	0	0.443077	325	127	0	127	0.280973	973.792	27.5583	11033.4	1064.1	0.0878714	0.193102	1	-0.269003
149	J08	GW525701	1	treatment	A375	190219_IDG_20	72	441	0.147239	0.0153374	0.279141	0.134969	0	0.423313	326	115	0	115	0.260771	973.792	27.5583	11033.4	1064.1	0.0878714	0.1729	2	-0.268361
150	H14	GW560459	1	treatment	A375	190219_IDG_21	72	11826	0.545967	0.264524	0.141706	0.015576	0	0.0322263	11171	655	0	655	0.0553864	973.792	27.5583	11033.4	1064.1	0.0878714	-0.032485	1	1.00709
150	H14	GW560459	1	treatment	A375	190219_IDG_20	72	11120	0.547437	0.266686	0.137072	0.0139715	0.0111394	0.0236949	10593	527	0	527	0.0473921	973.792	27.5583	11033.4	1064.1	0.0878714	-0.0404793	2	0.976873
151	E15	GW569293E	1	treatment	A375	190219_IDG_21	72	13168	0.526817	0.258145	0.130159	0.0195489	0.0314119	0.0339181	11970	1198	0	1198	0.0909781	973.792	27.5583	11033.4	1064.1	0.0878714	0.00310673	1	1.04708
151	E15	GW569293E	1	treatment	A375	190219_IDG_20	72	12744	0.555017	0.263914	0.133486	0.016314	0.00280398	0.0284646	11769	975	0	975	0.0765066	973.792	27.5583	11033.4	1064.1	0.0878714	-0.0113648	2	1.0372
152	D10	GW572399X	1	treatment	A375	190219_IDG_21	72	11437	0.51864	0.294867	0.132072	0.0155489	0.020326	0.0185463	10676	761	0	761	0.0665384	973.792	27.5583	11033.4	1064.1	0.0878714	-0.021333	1	0.981284
152	D10	GW572399X	1	treatment	A375	190219_IDG_20	72	12147	0.507631	0.312271	0.139402	0.0151718	0.00276662	0.0227577	11205	942	0	942	0.07755	973.792	27.5583	11033.4	1064.1	0.0878714	-0.0103214	2	1.00883
153	L22	GW576924A	1	treatment	A375	190219_IDG_21	72	11896	0.535939	0.274756	0.128724	0.0154869	0.00756126	0.037533	10977	919	0	919	0.0772529	973.792	27.5583	11033.4	1064.1	0.0878714	-0.0106185	1	0.997076
153	L22	GW576924A	1	treatment	A375	190219_IDG_20	72	11724	0.550806	0.281253	0.118981	0.0135901	0.0141301	0.0212402	11111	613	0	613	0.0522859	973.792	27.5583	11033.4	1064.1	0.0878714	-0.0355855	2	1.00401
154	N13	GW578748X	1	treatment	A375	190219_IDG_21	72	12132	0.515532	0.25139	0.138447	0.024257	0.04372	0.0266539	10430	1702	0	1702	0.14029	973.792	27.5583	11033.4	1064.1	0.0878714	0.0524187	1	0.968139
154	N13	GW578748X	1	treatment	A375	190219_IDG_20	72	13648	0.538295	0.250541	0.118293	0.0163606	0.0522095	0.0243003	12469	1179	0	1179	0.0863863	973.792	27.5583	11033.4	1064.1	0.0878714	-0.00148511	2	1.07109
155	J07	GW580509X	1	treatment	A375	190219_IDG_21	72	12903	0.544033	0.248233	0.12158	0.0182121	0.0452391	0.0227027	12025	878	0	878	0.0680462	973.792	27.5583	11033.4	1064.1	0.0878714	-0.0198252	1	1.04976
155	J07	GW580509X	1	treatment	A375	190219_IDG_20	72	11720	0.52444	0.281106	0.122645	0.0159083	0.0422147	0.0136865	11252	468	0	468	0.0399317	973.792	27.5583	11033.4	1064.1	0.0878714	-0.0479397	2	1.01124
156	G16	GW621970X	1	treatment	A375	190219_IDG_21	72	11853	0.538632	0.286465	0.137286	0.0166882	0	0.0209294	10846	1007	0	1007	0.0849574	973.792	27.5583	11033.4	1064.1	0.0878714	-0.002914	1	0.990242
156	G16	GW621970X	1	treatment	A375	190219_IDG_20	72	12209	0.552065	0.282887	0.127281	0.0195188	0	0.0182478	11015	1194	0	1194	0.0977967	973.792	27.5583	11033.4	1064.1	0.0878714	0.00992531	2	0.999048
157	K15	GW632580X	1	treatment	A375	190219_IDG_21	72	12798	0.468378	0.27727	0.137601	0.0246424	0.0574703	0.0346373	11606	1192	0	1192	0.0931396	973.792	27.5583	11033.4	1064.1	0.0878714	0.00526816	1	1.0291
157	K15	GW632580X	1	treatment	A375	190219_IDG_20	72	12873	0.538245	0.268611	0.137461	0.0191865	0.00289929	0.0335977	11727	1146	0	1146	0.0890235	973.792	27.5583	11033.4	1064.1	0.0878714	0.00115214	2	1.03512
158	M05	GW642138X	1	treatment	A375	190219_IDG_21	72	12688	0.569115	0.233154	0.138316	0.0175818	0.0103932	0.0314395	11546	1142	0	1142	0.0900063	973.792	27.5583	11033.4	1064.1	0.0878714	0.00213491	1	1.0261
158	M05	GW642138X	1	treatment	A375	190219_IDG_20	72	12783	0.585053	0.20883	0.129327	0.0133191	0.0429993	0.0204719	12163	620	0	620	0.0485019	973.792	27.5583	11033.4	1064.1	0.0878714	-0.0393695	2	1.05645
159	K17	GW651576X	1	treatment	A375	190219_IDG_21	72	12252	0.525168	0.274742	0.145536	0.0218035	0	0.0327501	11145	1107	0	1107	0.0903526	973.792	27.5583	11033.4	1064.1	0.0878714	0.0024812	1	1.00576
159	K17	GW651576X	1	treatment	A375	190219_IDG_20	72	12868	0.542163	0.267269	0.139113	0.0196353	0	0.0318198	11408	1460	0	1460	0.11346	973.792	27.5583	11033.4	1064.1	0.0878714	0.0255884	2	1.01916
160	M06	GW683134A	1	treatment	A375	190219_IDG_21	72	13303	0.687374	0.16835	0.080782	0.0137329	0.043703	0.00605865	12379	924	0	924	0.069458	973.792	27.5583	11033.4	1064.1	0.0878714	-0.0184134	1	1.06681
160	M06	GW683134A	1	treatment	A375	190219_IDG_20	72	12741	0.671201	0.177837	0.0861812	0.0111977	0.0466158	0.00696749	12056	685	0	685	0.0537634	973.792	27.5583	11033.4	1064.1	0.0878714	-0.034108	2	1.05126
161	M04	GW684088	1	treatment	A375	190219_IDG_21	72	12978	0.519667	0.284352	0.146341	0.0210409	0	0.0285984	11644	1334	0	1334	0.102789	973.792	27.5583	11033.4	1064.1	0.0878714	0.0149179	1	1.031
161	M04	GW684088	1	treatment	A375	190219_IDG_20	72	12504	0.522957	0.29713	0.13687	0.0165217	0.0026087	0.023913	11500	1004	0	1004	0.0802943	973.792	27.5583	11033.4	1064.1	0.0878714	-0.00757709	2	1.0238
162	N09	GW693917A	1	treatment	A375	190219_IDG_21	72	12695	0.643965	0.1499	0.097132	0.0168963	0.0827485	0.00935794	11541	1154	0	1154	0.0909019	973.792	27.5583	11033.4	1064.1	0.0878714	0.00303054	1	1.02585
162	N09	GW693917A	1	treatment	A375	190219_IDG_20	72	13404	0.723732	0.163928	0.0712593	0.0121662	0	0.0289145	12658	746	0	746	0.055655	973.792	27.5583	11033.4	1064.1	0.0878714	-0.0322164	2	1.08
163	N04	GW709042A	1	treatment	A375	190219_IDG_21	72	12334	0.623881	0.236633	0.0885282	0.0157309	0	0.0352272	11951	383	0	383	0.0310524	973.792	27.5583	11033.4	1064.1	0.0878714	-0.056819	1	1.04615
163	N04	GW709042A	1	treatment	A375	190219_IDG_20	72	12520	0.617211	0.218925	0.107649	0.011787	0.0281899	0.016238	12132	388	0	388	0.0309904	973.792	27.5583	11033.4	1064.1	0.0878714	-0.056881	2	1.05495
164	N12	GW770249X	1	treatment	A375	190219_IDG_21	72	11734	0.51599	0.251053	0.125814	0.0197242	0.059843	0.0275756	10444	1290	0	1290	0.109937	973.792	27.5583	11033.4	1064.1	0.0878714	0.0220655	1	0.968893
164	N12	GW770249X	1	treatment	A375	190219_IDG_20	72	12570	0.585965	0.237895	0.11114	0.0164035	0.022193	0.0264035	11400	1170	0	1170	0.0930788	973.792	27.5583	11033.4	1064.1	0.0878714	0.00520736	2	1.01875
165	J06	GW780159X	1	treatment	A375	190219_IDG_21	72	13985	0.491071	0.293478	0.145031	0.0169255	0.00830745	0.0451863	12880	1105	0	1105	0.0790132	973.792	27.5583	11033.4	1064.1	0.0878714	-0.00885817	1	1.09036
165	J06	GW780159X	1	treatment	A375	190219_IDG_20	72	13747	0.505257	0.296862	0.142201	0.0190016	0.0031929	0.0334865	12841	906	0	906	0.0659053	973.792	27.5583	11033.4	1064.1	0.0878714	-0.0219661	2	1.08855
166	J04	GW784752X	1	treatment	A375	190219_IDG_21	72	11287	0.54194	0.280165	0.1231	0.0167949	0.0168887	0.0211109	10658	629	0	629	0.0557278	973.792	27.5583	11033.4	1064.1	0.0878714	-0.0321436	1	0.980329
166	J04	GW784752X	1	treatment	A375	190219_IDG_20	72	11452	0.552374	0.269074	0.12664	0.01598	0.0143174	0.0216146	10826	626	0	626	0.0546629	973.792	27.5583	11033.4	1064.1	0.0878714	-0.0332085	2	0.989193
167	L21	GW792479	1	treatment	A375	190219_IDG_21	72	12074	0.473313	0.288887	0.154499	0.0224933	0	0.0608082	10492	1582	0	1582	0.131025	973.792	27.5583	11033.4	1064.1	0.0878714	0.0431539	1	0.971473
167	L21	GW792479	1	treatment	A375	190219_IDG_20	72	12518	0.469257	0.308601	0.144338	0.0206455	0	0.0571583	11092	1426	0	1426	0.113916	973.792	27.5583	11033.4	1064.1	0.0878714	0.0260446	2	1.00303
168	N10	GW807982X	1	treatment	A375	190219_IDG_21	72	11915	0.515728	0.275318	0.137067	0.0251454	0.0131151	0.0336259	10141	1774	0	1774	0.148888	973.792	27.5583	11033.4	1064.1	0.0878714	0.0610166	1	0.952411
168	N10	GW807982X	1	treatment	A375	190219_IDG_20	72	11516	0.503949	0.247502	0.133409	0.023123	0.0707013	0.0213151	10509	1007	0	1007	0.0874436	973.792	27.5583	11033.4	1064.1	0.0878714	-0.000427838	2	0.972384
169	D08	GW810372X	1	treatment	A375	190219_IDG_21	72	9383	0.544018	0.242293	0.147357	0.0180301	0.0234836	0.0248191	8985	398	0	398	0.0424171	973.792	27.5583	11033.4	1064.1	0.0878714	-0.0454543	1	0.88609
169	D08	GW810372X	1	treatment	A375	190219_IDG_20	72	9373	0.539823	0.244203	0.153131	0.0185953	0.0235241	0.0207236	8927	446	0	446	0.0475835	973.792	27.5583	11033.4	1064.1	0.0878714	-0.0402879	2	0.882605
170	I15	GW811761X	1	treatment	A375	190219_IDG_21	72	11854	0.552311	0.277803	0.123753	0.0162014	0	0.0299314	10925	929	0	929	0.0783702	973.792	27.5583	11033.4	1064.1	0.0878714	-0.00950122	1	0.99437
170	I15	GW811761X	1	treatment	A375	190219_IDG_20	72	12554	0.55482	0.26845	0.130106	0.0174098	0	0.0292144	11775	779	0	779	0.0620519	973.792	27.5583	11033.4	1064.1	0.0878714	-0.0258195	2	1.0375
171	K04	GW814408X	1	treatment	A375	190219_IDG_21	72	7268	0.588253	0.196724	0.162338	0.0270071	0	0.0256789	6776	492	0	492	0.067694	973.792	27.5583	11033.4	1064.1	0.0878714	-0.0201774	1	0.740086
171	K04	GW814408X	1	treatment	A375	190219_IDG_20	72	5775	0.543437	0.202769	0.195561	0.0276935	0.00436267	0.026176	5272	503	0	503	0.0870996	973.792	27.5583	11033.4	1064.1	0.0878714	-0.000771827	2	0.619748
172	K09	GW830263A	1	treatment	A375	190219_IDG_21	72	13123	0.556679	0.253097	0.134176	0.0176148	0	0.0384324	11865	1258	0	1258	0.0958622	973.792	27.5583	11033.4	1064.1	0.0878714	0.00799083	1	1.04193
172	K09	GW830263A	1	treatment	A375	190219_IDG_20	72	13168	0.540818	0.247715	0.126704	0.0145148	0.0472334	0.0230152	12470	698	0	698	0.0530073	973.792	27.5583	11033.4	1064.1	0.0878714	-0.0348641	2	1.07114
173	N16	GW830900A	1	treatment	A375	190219_IDG_21	72	11962	0.502128	0.273779	0.136658	0.0203553	0.0288675	0.0382124	10808	1154	0	1154	0.0964722	973.792	27.5583	11033.4	1064.1	0.0878714	0.00860077	1	0.988248
173	N16	GW830900A	1	treatment	A375	190219_IDG_20	72	12729	0.534532	0.264748	0.141547	0.0193345	0.00458633	0.0352518	11120	1609	0	1609	0.126404	973.792	27.5583	11033.4	1064.1	0.0878714	0.0385329	2	1.00447
174	N21	GW832467	1	treatment	A375	190219_IDG_21	72	11797	0.571992	0.256034	0.122419	0.0156006	0.00679086	0.0271634	10897	900	0	900	0.0762906	973.792	27.5583	11033.4	1064.1	0.0878714	-0.0115808	1	0.992909
174	N21	GW832467	1	treatment	A375	190219_IDG_20	72	11912	0.560606	0.263247	0.121744	0.0155059	0.0124934	0.0264044	11286	626	0	626	0.052552	973.792	27.5583	11033.4	1064.1	0.0878714	-0.0353193	2	1.01297
175	E14	GW855857	1	treatment	A375	190219_IDG_21	72	13568	0.423024	0.323824	0.16067	0.0246618	0	0.06782	10867	2701	0	2701	0.199071	973.792	27.5583	11033.4	1064.1	0.0878714	0.1112	1	0.991341
175	E14	GW855857	1	treatment	A375	190219_IDG_20	72	13422	0.447586	0.330192	0.163346	0.0198349	0	0.0390415	11142	2280	0	2280	0.16987	973.792	27.5583	11033.4	1064.1	0.0878714	0.081999	2	1.0056
176	D03	GW867253	1	treatment	A375	190219_IDG_21	72	11584	0.602188	0.24412	0.105105	0.0136737	0.0179581	0.0169553	10970	614	0	614	0.0530041	973.792	27.5583	11033.4	1064.1	0.0878714	-0.0348673	1	0.996712
176	D03	GW867253	1	treatment	A375	190219_IDG_20	72	11453	0.602638	0.25357	0.107685	0.0112779	0.0143702	0.0104593	10995	458	0	458	0.0399895	973.792	27.5583	11033.4	1064.1	0.0878714	-0.0478819	2	0.998011
177	D07	GW868318	1	treatment	A375	190219_IDG_21	72	11912	0.530455	0.255733	0.125582	0.0166607	0.0492655	0.0223038	11164	748	0	748	0.0627938	973.792	27.5583	11033.4	1064.1	0.0878714	-0.0250776	1	1.00673
177	D07	GW868318	1	treatment	A375	190219_IDG_20	72	11609	0.56537	0.258955	0.119462	0.0142561	0.0253541	0.016602	11083	526	0	526	0.0453097	973.792	27.5583	11033.4	1064.1	0.0878714	-0.0425617	2	1.00256
178	E11	HG-10-102-01	1	treatment	A375	190219_IDG_21	72	12557	0.534882	0.263363	0.141388	0.0178176	0.0099282	0.0326212	11281	1276	0	1276	0.101617	973.792	27.5583	11033.4	1064.1	0.0878714	0.0137452	1	1.01272
178	E11	HG-10-102-01	1	treatment	A375	190219_IDG_20	72	12419	0.555973	0.259375	0.138076	0.0183368	0	0.0282387	10907	1512	0	1512	0.121749	973.792	27.5583	11033.4	1064.1	0.0878714	0.0338775	2	0.993431
179	G11	HTH-01-015	1	treatment	A375	190219_IDG_21	72	12161	0.53872	0.259374	0.128189	0.0187018	0.0294144	0.0256015	11015	1146	0	1146	0.0942357	973.792	27.5583	11033.4	1064.1	0.0878714	0.00636428	1	0.999048
179	G11	HTH-01-015	1	treatment	A375	190219_IDG_20	72	11670	0.565683	0.26599	0.130435	0.0140583	0.00297924	0.0208547	10741	929	0	929	0.0796058	973.792	27.5583	11033.4	1064.1	0.0878714	-0.00826557	2	0.984721
180	H10	JH-II-127	1	treatment	A375	190219_IDG_21	72	9018	0.58364	0.205928	0.154357	0.0278601	0.00403082	0.0241849	8435	583	0	583	0.0646485	973.792	27.5583	11033.4	1064.1	0.0878714	-0.0232229	1	0.852376
180	H10	JH-II-127	1	treatment	A375	190219_IDG_20	72	8331	0.582603	0.185567	0.164562	0.0278351	0.0226804	0.0167526	7760	571	0	571	0.0685392	973.792	27.5583	11033.4	1064.1	0.0878714	-0.0193322	2	0.80878
181	C10	JNK-IN-7	1	treatment	A375	190219_IDG_21	72	10981	0.522445	0.281665	0.146786	0.0184405	0	0.0306639	9490	1491	0	1491	0.13578	973.792	27.5583	11033.4	1064.1	0.0878714	0.0479086	1	0.91577
181	C10	JNK-IN-7	1	treatment	A375	190219_IDG_20	72	10149	0.563831	0.243866	0.14766	0.0175116	0.00259431	0.0245379	9251	898	0	898	0.0884816	973.792	27.5583	11033.4	1064.1	0.0878714	0.000610229	2	0.901868
182	L11	K05908	1	treatment	A375	190219_IDG_21	72	13195	0.49157	0.294696	0.147524	0.0240604	0	0.0421496	11388	1807	0	1807	0.136946	973.792	27.5583	11033.4	1064.1	0.0878714	0.0490744	1	1.01815
182	L11	K05908	1	treatment	A375	190219_IDG_20	72	12729	0.498643	0.293232	0.150425	0.020401	0.00315209	0.0341476	11421	1308	0	1308	0.102757	973.792	27.5583	11033.4	1064.1	0.0878714	0.0148861	2	1.01982
183	D19	NVP-2	1	treatment	A375	190219_IDG_21	72	12071	0.517372	0.285463	0.133327	0.019735	0.0119522	0.0321505	10793	1278	0	1278	0.105874	973.792	27.5583	11033.4	1064.1	0.0878714	0.0180022	1	0.98746
183	D19	NVP-2	1	treatment	A375	190219_IDG_20	72	12197	0.550681	0.270936	0.130609	0.0175295	0	0.0302452	11010	1187	0	1187	0.097319	973.792	27.5583	11033.4	1064.1	0.0878714	0.00944762	2	0.998789
184	G10	NVS-PAK1-1	1	treatment	A375	190219_IDG_21	72	12598	0.544855	0.27477	0.133177	0.0168315	0	0.0303661	11526	1072	0	1072	0.0850929	973.792	27.5583	11033.4	1064.1	0.0878714	-0.00277852	1	1.0251
184	G10	NVS-PAK1-1	1	treatment	A375	190219_IDG_20	72	12278	0.568846	0.270382	0.119263	0.0152699	0.00351031	0.0227293	11395	883	0	883	0.0719173	973.792	27.5583	11033.4	1064.1	0.0878714	-0.0159541	2	1.0185
185	C06	PFE-PKIS 1	1	treatment	A375	190219_IDG_21	72	11707	0.547977	0.259573	0.117038	0.0157672	0.0432471	0.0163979	11099	608	0	608	0.0519347	973.792	27.5583	11033.4	1064.1	0.0878714	-0.0359367	1	1.00339
185	C06	PFE-PKIS 1	1	treatment	A375	190219_IDG_20	72	11132	0.555261	0.2594	0.116583	0.0134482	0.04186	0.0134482	10559	573	0	573	0.0514732	973.792	27.5583	11033.4	1064.1	0.0878714	-0.0363982	2	0.975059
186	E06	PFE-PKIS 12	1	treatment	A375	190219_IDG_21	72	12095	0.557459	0.279213	0.120102	0.0143209	0.00694078	0.0219645	11382	713	0	713	0.05895	973.792	27.5583	11033.4	1064.1	0.0878714	-0.0289214	1	1.01784
186	E06	PFE-PKIS 12	1	treatment	A375	190219_IDG_20	72	11436	0.559956	0.264285	0.128866	0.0156928	0.013662	0.017539	10833	603	0	603	0.0527282	973.792	27.5583	11033.4	1064.1	0.0878714	-0.0351432	2	0.98956
187	E07	PFE-PKIS 21 (PD 0325901)	1	treatment	A375	190219_IDG_21	72	2167	0.941297	0.0183767	0.0250128	0.00816743	0	0.0071465	1959	208	0	208	0.0959852	973.792	27.5583	11033.4	1064.1	0.0878714	0.00811384	1	0.220904
187	E07	PFE-PKIS 21 (PD 0325901)	1	treatment	A375	190219_IDG_20	72	2435	0.909744	0.00224517	0.0359228	0.013022	0.0332286	0.00583745	2227	208	0	208	0.0854209	973.792	27.5583	11033.4	1064.1	0.0878714	-0.00245045	2	0.266432
188	I11	PFE-PKIS 25	1	treatment	A375	190219_IDG_21	72	12357	0.549624	0.261534	0.131438	0.017525	0	0.0398784	11184	1173	0	1173	0.094926	973.792	27.5583	11033.4	1064.1	0.0878714	0.00705456	1	1.00776
188	I11	PFE-PKIS 25	1	treatment	A375	190219_IDG_20	72	12325	0.547188	0.265217	0.141342	0.0176455	0	0.0286071	11221	1104	0	1104	0.089574	973.792	27.5583	11033.4	1064.1	0.0878714	0.00170264	2	1.00965
189	N20	PFE-PKIS 29	1	treatment	A375	190219_IDG_21	72	2875	0.543486	0.256514	0.137982	0.0183486	0	0.0436697	2725	150	0	150	0.0521739	973.792	27.5583	11033.4	1064.1	0.0878714	-0.0356975	1	0.341555
189	N20	PFE-PKIS 29	1	treatment	A375	190219_IDG_20	72	2759	0.561536	0.220926	0.151675	0.0184419	0.000752729	0.0466692	2657	102	0	102	0.0369699	973.792	27.5583	11033.4	1064.1	0.0878714	-0.0509015	2	0.33191
190	M17	PFE-PKIS 3	1	treatment	A375	190219_IDG_21	72	12282	0.522435	0.27943	0.138659	0.0168925	0.00739046	0.0351927	11366	916	0	916	0.0745807	973.792	27.5583	11033.4	1064.1	0.0878714	-0.0132907	1	1.01703
190	M17	PFE-PKIS 3	1	treatment	A375	190219_IDG_20	72	12058	0.530837	0.280678	0.136467	0.0163979	0.00437278	0.0312472	10977	1081	0	1081	0.08965	973.792	27.5583	11033.4	1064.1	0.0878714	0.00177863	2	0.997076
191	L12	PFE-PKIS 32	1	treatment	A375	190219_IDG_21	72	9141	0.604236	0.197767	0.111086	0.0147347	0.0631979	0.00897893	8687	454	0	454	0.0496663	973.792	27.5583	11033.4	1064.1	0.0878714	-0.0382051	1	0.868012
191	L12	PFE-PKIS 32	1	treatment	A375	190219_IDG_20	72	8270	0.65559	0.214616	0.101437	0.0116177	0	0.0167395	8005	265	0	265	0.0320435	973.792	27.5583	11033.4	1064.1	0.0878714	-0.0558279	2	0.824906
192	I14	PFE-PKIS 34	1	treatment	A375	190219_IDG_21	72	11862	0.540902	0.262073	0.143462	0.0175092	0	0.0360538	10623	1239	0	1239	0.104451	973.792	27.5583	11033.4	1064.1	0.0878714	0.0165798	1	0.97847
192	I14	PFE-PKIS 34	1	treatment	A375	190219_IDG_20	72	13224	0.504617	0.294077	0.13885	0.0186411	0	0.0438153	11480	1744	0	1744	0.131881	973.792	27.5583	11033.4	1064.1	0.0878714	0.04401	2	1.02279
193	C13	PFE-PKIS 39	1	treatment	A375	190219_IDG_21	72	11936	0.512621	0.269256	0.139898	0.0188627	0.031068	0.028294	10815	1121	0	1121	0.0939176	973.792	27.5583	11033.4	1064.1	0.0878714	0.00604617	1	0.988616
193	C13	PFE-PKIS 39	1	treatment	A375	190219_IDG_20	72	12213	0.557957	0.268798	0.128505	0.0145562	0.00258975	0.0275942	11198	1015	0	1015	0.0831082	973.792	27.5583	11033.4	1064.1	0.0878714	-0.00476323	2	1.00848
194	E04	PFE-PKIS 40	1	treatment	A375	190219_IDG_21	72	3049	0.553957	0.256595	0.133265	0.020555	0	0.0356286	2919	130	0	130	0.0426369	973.792	27.5583	11033.4	1064.1	0.0878714	-0.0452345	1	0.36816
194	E04	PFE-PKIS 40	1	treatment	A375	190219_IDG_20	72	3463	0.609697	0.214545	0.130303	0.0160606	0	0.0293939	3300	163	0	163	0.047069	973.792	27.5583	11033.4	1064.1	0.0878714	-0.0408024	2	0.416937
195	H12	PFE-PKIS 41	1	treatment	A375	190219_IDG_21	72	12389	0.553445	0.254408	0.127757	0.0161826	0.0191636	0.0290435	11741	648	0	648	0.0523045	973.792	27.5583	11033.4	1064.1	0.0878714	-0.0355669	1	1.03582
195	H12	PFE-PKIS 41	1	treatment	A375	190219_IDG_20	72	12053	0.55791	0.272491	0.12803	0.0139163	0.00323218	0.0244209	11138	915	0	915	0.0759147	973.792	27.5583	11033.4	1064.1	0.0878714	-0.0119567	2	1.0054
196	F13	PFE-PKIS 44	1	treatment	A375	190219_IDG_21	72	9287	0.622372	0.225408	0.0966835	0.0145025	0.0350759	0.0059584	8895	392	0	392	0.0422095	973.792	27.5583	11033.4	1064.1	0.0878714	-0.0456619	1	0.880676
196	F13	PFE-PKIS 44	1	treatment	A375	190219_IDG_20	72	9778	0.645528	0.207499	0.0994108	0.0119979	0.0312801	0.00428495	9335	443	0	443	0.0453058	973.792	27.5583	11033.4	1064.1	0.0878714	-0.0425656	2	0.906783
197	F19	SB-216385	1	treatment	A375	190219_IDG_21	72	12044	0.56623	0.260226	0.127133	0.0163431	0	0.0300677	11075	969	0	969	0.080455	973.792	27.5583	11033.4	1064.1	0.0878714	-0.0074164	1	1.00215
197	F19	SB-216385	1	treatment	A375	190219_IDG_20	72	12248	0.536902	0.277247	0.141205	0.018738	0	0.0259082	10460	1788	0	1788	0.145983	973.792	27.5583	11033.4	1064.1	0.0878714	0.0581116	2	0.969754
198	G15	SB-219980	1	treatment	A375	190219_IDG_21	72	10237	0.558023	0.249284	0.146234	0.0155546	0.0134056	0.017499	9772	465	0	465	0.0454235	973.792	27.5583	11033.4	1064.1	0.0878714	-0.0424479	1	0.931856
198	G15	SB-219980	1	treatment	A375	190219_IDG_20	72	9339	0.544946	0.26979	0.144119	0.0129696	0.0177773	0.010398	8944	395	0	395	0.0422957	973.792	27.5583	11033.4	1064.1	0.0878714	-0.0455756	2	0.883628
199	N06	SB-242719	1	treatment	A375	190219_IDG_21	72	12387	0.567072	0.251985	0.115138	0.01605	0.02568	0.024075	11838	549	0	549	0.0443207	973.792	27.5583	11033.4	1064.1	0.0878714	-0.0435507	1	1.0406
199	N06	SB-242719	1	treatment	A375	190219_IDG_20	72	12138	0.569738	0.247105	0.124489	0.0148161	0.0219687	0.0218835	11744	394	0	394	0.03246	973.792	27.5583	11033.4	1064.1	0.0878714	-0.0554114	2	1.03596
200	J10	SB-282975	1	treatment	A375	190219_IDG_21	72	12683	0.547546	0.259636	0.135833	0.017034	0	0.0399508	11389	1294	0	1294	0.102026	973.792	27.5583	11033.4	1064.1	0.0878714	0.0141549	1	1.0182
200	J10	SB-282975	1	treatment	A375	190219_IDG_20	72	12411	0.546136	0.254239	0.133595	0.0167845	0.0238562	0.0253898	11737	674	0	674	0.0543067	973.792	27.5583	11033.4	1064.1	0.0878714	-0.0335647	2	1.03562
201	L17	SB-517081	1	treatment	A375	190219_IDG_21	72	13317	0.531242	0.260224	0.143014	0.0190573	0	0.0464626	11859	1458	0	1458	0.109484	973.792	27.5583	11033.4	1064.1	0.0878714	0.0216127	1	1.04164
201	L17	SB-517081	1	treatment	A375	190219_IDG_20	72	12836	0.517441	0.292218	0.138146	0.0135895	0	0.0386047	11553	1283	0	1283	0.0999533	973.792	27.5583	11033.4	1064.1	0.0878714	0.0120819	2	1.02645
202	E20	SB-590885	1	treatment	A375	190219_IDG_21	72	4412	0.779146	0.145788	0.0439295	0.0016896	0	0.0294473	4143	269	0	269	0.0609701	973.792	27.5583	11033.4	1064.1	0.0878714	-0.0269013	1	0.512037
202	E20	SB-590885	1	treatment	A375	190219_IDG_20	72	4443	0.805085	0.123971	0.0503632	0.0101695	0	0.0104116	4130	313	0	313	0.0704479	973.792	27.5583	11033.4	1064.1	0.0878714	-0.0174235	2	0.510681
203	J03	SB-633825	1	treatment	A375	190219_IDG_21	72	11551	0.53032	0.297501	0.118063	0.0148842	0.016538	0.0226939	10884	667	0	667	0.0577439	973.792	27.5583	11033.4	1064.1	0.0878714	-0.0301275	1	0.99223
203	J03	SB-633825	1	treatment	A375	190219_IDG_20	72	13190	0.567579	0.256553	0.129014	0.0156455	0.00237549	0.0288336	12208	982	0	982	0.0744503	973.792	27.5583	11033.4	1064.1	0.0878714	-0.0134211	2	1.05862
204	I21	SB-693162/GW549034	1	treatment	A375	190219_IDG_21	72	11703	0.542106	0.2676	0.140322	0.016785	0	0.0331863	10426	1277	0	1277	0.109117	973.792	27.5583	11033.4	1064.1	0.0878714	0.0212459	1	0.967924
204	I21	SB-693162/GW549034	1	treatment	A375	190219_IDG_20	72	11510	0.521386	0.280924	0.146285	0.0189759	0	0.0324297	9960	1550	0	1550	0.134666	973.792	27.5583	11033.4	1064.1	0.0878714	0.0467941	2	0.942396
205	I20	SB-708998	1	treatment	A375	190219_IDG_21	72	11490	0.540514	0.283396	0.134183	0.0151304	0	0.0267768	10046	1444	0	1444	0.125674	973.792	27.5583	11033.4	1064.1	0.0878714	0.0378031	1	0.947171
205	I20	SB-708998	1	treatment	A375	190219_IDG_20	72	11559	0.521717	0.290212	0.144431	0.0195345	0	0.0241064	9624	1935	0	1935	0.167402	973.792	27.5583	11033.4	1064.1	0.0878714	0.0795306	2	0.923456
206	N05	SB-710397	1	treatment	A375	190219_IDG_21	72	10893	0.50245	0.280292	0.14029	0.0162391	0.0262323	0.034496	10407	486	0	486	0.0446158	973.792	27.5583	11033.4	1064.1	0.0878714	-0.0432556	1	0.966899
206	N05	SB-710397	1	treatment	A375	190219_IDG_20	72	11210	0.52395	0.272845	0.130343	0.0135409	0.0331614	0.0261606	10856	354	0	354	0.0315789	973.792	27.5583	11033.4	1064.1	0.0878714	-0.0562924	2	0.990765
207	D15	SB-725317	1	treatment	A375	190219_IDG_21	72	5735	0.561301	0.212078	0.168047	0.0236316	0	0.0349424	4951	784	0	784	0.136704	973.792	27.5583	11033.4	1064.1	0.0878714	0.0488331	1	0.590952
207	D15	SB-725317	1	treatment	A375	190219_IDG_20	72	4999	0.512201	0.219382	0.209389	0.0271903	0.00278875	0.0290495	4303	696	0	696	0.139228	973.792	27.5583	11033.4	1064.1	0.0878714	0.0513565	2	0.528486
208	N08	SB-732932	1	treatment	A375	190219_IDG_21	72	12838	0.571891	0.248818	0.113167	0.0162615	0.0322741	0.017589	12053	785	0	785	0.0611466	973.792	27.5583	11033.4	1064.1	0.0878714	-0.0267248	1	1.05112
208	N08	SB-732932	1	treatment	A375	190219_IDG_20	72	13510	0.520768	0.256057	0.115639	0.0186438	0.0737099	0.0151825	12712	798	0	798	0.0590674	973.792	27.5583	11033.4	1064.1	0.0878714	-0.028804	2	1.08253
209	L19	SB-733894	1	treatment	A375	190219_IDG_21	72	13465	0.562172	0.260277	0.130773	0.0153104	0	0.0314668	11822	1643	0	1643	0.12202	973.792	27.5583	11033.4	1064.1	0.0878714	0.0341487	1	1.03982
209	L19	SB-733894	1	treatment	A375	190219_IDG_20	72	13244	0.567522	0.242151	0.13842	0.0218602	0	0.0300473	11848	1396	0	1396	0.105406	973.792	27.5583	11033.4	1064.1	0.0878714	0.0175348	2	1.0411
210	J11	SB-735464	1	treatment	A375	190219_IDG_21	72	11488	0.56892	0.228263	0.143005	0.0165258	0.0241315	0.0191549	10650	838	0	838	0.0729457	973.792	27.5583	11033.4	1064.1	0.0878714	-0.0149257	1	0.979905
210	J11	SB-735464	1	treatment	A375	190219_IDG_20	72	11338	0.57543	0.24664	0.131215	0.014663	0.0163549	0.015697	10639	699	0	699	0.0616511	973.792	27.5583	11033.4	1064.1	0.0878714	-0.0262203	2	0.979321
211	K18	SB-742609	1	treatment	A375	190219_IDG_21	72	12321	0.519313	0.294771	0.137895	0.0212584	0	0.0267628	10537	1784	0	1784	0.144793	973.792	27.5583	11033.4	1064.1	0.0878714	0.056922	1	0.973883
211	K18	SB-742609	1	treatment	A375	190219_IDG_20	72	12592	0.497565	0.299366	0.114307	0.0269227	0	0.0618396	10883	1709	0	1709	0.135721	973.792	27.5583	11033.4	1064.1	0.0878714	0.0478497	2	0.992178
212	F10	SB-747651A	1	treatment	A375	190219_IDG_21	72	12778	0.562965	0.262618	0.122125	0.0171273	0.0176237	0.017541	12086	692	0	692	0.0541556	973.792	27.5583	11033.4	1064.1	0.0878714	-0.0337158	1	1.05272
212	F10	SB-747651A	1	treatment	A375	190219_IDG_20	72	12196	0.565027	0.270611	0.107562	0.0126028	0.03317	0.0110275	11426	770	0	770	0.0631355	973.792	27.5583	11033.4	1064.1	0.0878714	-0.0247359	2	1.02007
213	N19	SB-772077-B	1	treatment	A375	190219_IDG_21	72	14327	0.516273	0.326606	0.119414	0.0197254	0	0.0179804	13181	1146	0	1146	0.0799888	973.792	27.5583	11033.4	1064.1	0.0878714	-0.00788256	1	1.10419
213	N19	SB-772077-B	1	treatment	A375	190219_IDG_20	72	14081	0.534652	0.325004	0.105617	0.0158538	0.00203835	0.0168353	13246	835	0	835	0.0592998	973.792	27.5583	11033.4	1064.1	0.0878714	-0.0285716	2	1.10715
214	J15	TH257	1	treatment	A375	190219_IDG_21	72	12999	0.546173	0.257709	0.136207	0.0171414	0	0.0427695	11901	1098	0	1098	0.084468	973.792	27.5583	11033.4	1064.1	0.0878714	-0.00340336	1	1.0437
214	J15	TH257	1	treatment	A375	190219_IDG_20	72	11723	0.526187	0.290598	0.134479	0.0150937	0	0.0336425	10998	725	0	725	0.0618442	973.792	27.5583	11033.4	1064.1	0.0878714	-0.0260272	2	0.998166
215	M07	THZ1	1	treatment	A375	190219_IDG_21	72	289	0.582474	0	0.360825	0.0309278	0	0.0257732	194	95	0	95	0.32872	973.792	27.5583	11033.4	1064.1	0.0878714	0.240848	1	-0.369142
215	M07	THZ1	1	treatment	A375	190219_IDG_20	72	268	0.554404	0.00518135	0.202073	0.108808	0	0.129534	193	75	0	75	0.279851	973.792	27.5583	11033.4	1064.1	0.0878714	0.191979	2	-0.370073
216	J14	THZ531	1	treatment	A375	190219_IDG_21	72	3209	0.52937	0.203631	0.176575	0.0373799	0.0359559	0.0170879	2809	400	0	400	0.124649	973.792	27.5583	11033.4	1064.1	0.0878714	0.036778	1	0.353236
216	J14	THZ531	1	treatment	A375	190219_IDG_20	72	3133	0.560789	0.177802	0.190581	0.0332238	0.0167945	0.0208105	2739	394	0	394	0.125758	973.792	27.5583	11033.4	1064.1	0.0878714	0.0378867	2	0.34352
217	K10	TPKI-100	1	treatment	A375	190219_IDG_21	72	12488	0.521422	0.274832	0.144476	0.0244957	0	0.0347743	10410	2078	0	2078	0.1664	973.792	27.5583	11033.4	1064.1	0.0878714	0.0785283	1	0.967061
217	K10	TPKI-100	1	treatment	A375	190219_IDG_20	72	12823	0.511601	0.29279	0.145726	0.0174906	0	0.0323934	11206	1617	0	1617	0.126102	973.792	27.5583	11033.4	1064.1	0.0878714	0.0382301	2	1.00889
218	I19	TPKI-105	1	treatment	A375	190219_IDG_21	72	11590	0.543321	0.266589	0.139187	0.0178692	0	0.0330339	10353	1237	0	1237	0.10673	973.792	27.5583	11033.4	1064.1	0.0878714	0.0188585	1	0.963979
218	I19	TPKI-105	1	treatment	A375	190219_IDG_20	72	12390	0.528232	0.282132	0.144038	0.018945	0	0.026653	10768	1622	0	1622	0.130912	973.792	27.5583	11033.4	1064.1	0.0878714	0.0430406	2	0.986144
219	L18	TPKI-106	1	treatment	A375	190219_IDG_21	72	12800	0.560431	0.256069	0.12553	0.0195213	0.00976065	0.0286878	11782	1018	0	1018	0.0795312	973.792	27.5583	11033.4	1064.1	0.0878714	-0.00834014	1	1.03784
219	L18	TPKI-106	1	treatment	A375	190219_IDG_20	72	12550	0.539885	0.277759	0.127091	0.0172385	0.0150414	0.0229846	11834	716	0	716	0.0570518	973.792	27.5583	11033.4	1064.1	0.0878714	-0.0308196	2	1.04041
220	N17	TPKI-16	1	treatment	A375	190219_IDG_21	72	2378	0.932969	0.00866393	0.0269038	0.00638395	0	0.0250798	2193	185	0	185	0.0777965	973.792	27.5583	11033.4	1064.1	0.0878714	-0.0100749	1	0.260881
220	N17	TPKI-16	1	treatment	A375	190219_IDG_20	72	2522	0.929207	0.00593472	0.0432387	0.00296736	0	0.018652	2359	163	0	163	0.0646312	973.792	27.5583	11033.4	1064.1	0.0878714	-0.0232401	2	0.287427
221	N15	TPKI-24	1	treatment	A375	190219_IDG_21	72	530	0.226006	0.0278638	0.346749	0.20743	0	0.19195	323	207	0	207	0.390566	973.792	27.5583	11033.4	1064.1	0.0878714	0.302695	1	-0.27029
221	N15	TPKI-24	1	treatment	A375	190219_IDG_20	72	413	0.140288	0.0143885	0.352518	0.158273	0	0.334532	278	135	0	135	0.326877	973.792	27.5583	11033.4	1064.1	0.0878714	0.239005	2	-0.300891
222	K11	TPKI-26	1	treatment	A375	190219_IDG_21	72	394	0.0960699	0.0262009	0.554585	0.174672	0	0.144105	229	165	0	165	0.418782	973.792	27.5583	11033.4	1064.1	0.0878714	0.33091	1	-0.338546
222	K11	TPKI-26	1	treatment	A375	190219_IDG_20	72	328	0.247748	0.018018	0.391892	0.18018	0	0.162162	222	106	0	106	0.323171	973.792	27.5583	11033.4	1064.1	0.0878714	0.235299	2	-0.344383
223	J12	TPKI-39	1	treatment	A375	190219_IDG_21	72	12466	0.54698	0.261886	0.13681	0.0179922	0	0.036332	11505	961	0	961	0.0770897	973.792	27.5583	11033.4	1064.1	0.0878714	-0.0107817	1	1.02405
223	J12	TPKI-39	1	treatment	A375	190219_IDG_20	72	11561	0.533183	0.289933	0.136764	0.0156543	0.00253093	0.0219348	10668	893	0	893	0.0772425	973.792	27.5583	11033.4	1064.1	0.0878714	-0.0106289	2	0.98086
224	K19	TPKI-58	1	treatment	A375	190219_IDG_21	72	13235	0.50984	0.287356	0.144201	0.0220307	0	0.0365726	11484	1751	0	1751	0.132301	973.792	27.5583	11033.4	1064.1	0.0878714	0.0444293	1	1.02299
224	K19	TPKI-58	1	treatment	A375	190219_IDG_20	72	12066	0.508842	0.306268	0.139802	0.0178687	0	0.0272197	10801	1265	0	1265	0.10484	973.792	27.5583	11033.4	1064.1	0.0878714	0.0169687	2	0.98788
225	J13	TPKI-69	1	treatment	A375	190219_IDG_21	72	12758	0.529872	0.272269	0.143513	0.0174555	0	0.0368904	11114	1644	0	1644	0.12886	973.792	27.5583	11033.4	1064.1	0.0878714	0.0409889	1	1.00416
225	J13	TPKI-69	1	treatment	A375	190219_IDG_20	72	13875	0.557131	0.241785	0.134279	0.0228524	0	0.0439533	11990	1885	0	1885	0.135856	973.792	27.5583	11033.4	1064.1	0.0878714	0.0479845	2	1.04805
226	D13	TPKI-72	1	treatment	A375	190219_IDG_21	72	10746	0.510538	0.278993	0.130656	0.0188792	0.0412546	0.0196784	10011	735	0	735	0.0683975	973.792	27.5583	11033.4	1064.1	0.0878714	-0.0194739	1	0.945231
226	D13	TPKI-72	1	treatment	A375	190219_IDG_20	72	12933	0.557622	0.253319	0.128435	0.0174178	0.0242665	0.0189397	11827	1106	0	1106	0.0855177	973.792	27.5583	11033.4	1064.1	0.0878714	-0.00235373	2	1.04006
227	D21	TPKI-85	1	treatment	A375	190219_IDG_21	72	12153	0.545132	0.279417	0.130031	0.0198352	0	0.0255845	10436	1717	0	1717	0.141282	973.792	27.5583	11033.4	1064.1	0.0878714	0.0534106	1	0.968462
227	D21	TPKI-85	1	treatment	A375	190219_IDG_20	72	11651	0.553056	0.274719	0.12978	0.0197555	0	0.0226895	10225	1426	0	1426	0.122393	973.792	27.5583	11033.4	1064.1	0.0878714	0.0345215	2	0.957015
228	H04	TPKI-91	1	treatment	A375	190219_IDG_21	72	12314	0.569499	0.261427	0.119796	0.0152082	0.0129142	0.0211555	11770	544	0	544	0.0441774	973.792	27.5583	11033.4	1064.1	0.0878714	-0.043694	1	1.03725
228	H04	TPKI-91	1	treatment	A375	190219_IDG_20	72	11629	0.551976	0.265584	0.131149	0.0173405	0.0158803	0.0180706	10957	672	0	672	0.0577866	973.792	27.5583	11033.4	1064.1	0.0878714	-0.0300848	2	0.996037
229	E19	TPKI-97	1	treatment	A375	190219_IDG_21	72	11883	0.540521	0.277207	0.139854	0.0138001	0	0.0286191	10797	1086	0	1086	0.0913911	973.792	27.5583	11033.4	1064.1	0.0878714	0.00351967	1	0.98767
229	E19	TPKI-97	1	treatment	A375	190219_IDG_20	72	11568	0.540718	0.280942	0.138478	0.0133827	0.00360668	0.022874	10536	1032	0	1032	0.0892116	973.792	27.5583	11033.4	1064.1	0.0878714	0.00134022	2	0.97383
230	E21	TX-85-1	1	treatment	A375	190219_IDG_21	72	10532	0.533899	0.285654	0.136435	0.0167662	0	0.0272451	9543	989	0	989	0.0939043	973.792	27.5583	11033.4	1064.1	0.0878714	0.0060329	1	0.918819
230	E21	TX-85-1	1	treatment	A375	190219_IDG_20	72	11002	0.523971	0.276268	0.136037	0.020875	0.0252697	0.0175789	10012	990	0	990	0.0899836	973.792	27.5583	11033.4	1064.1	0.0878714	0.00211224	2	0.945287
231	H11	UNC-AA-1-0013 (SGC-AAK1-1)	1	treatment	A375	190219_IDG_21	72	12015	0.529707	0.274726	0.139921	0.0175013	0.00709029	0.0310537	11142	873	0	873	0.0726592	973.792	27.5583	11033.4	1064.1	0.0878714	-0.0152122	1	1.0056
231	H11	UNC-AA-1-0013 (SGC-AAK1-1)	1	treatment	A375	190219_IDG_20	72	11475	0.532263	0.283284	0.139789	0.0183408	0.00332605	0.0229972	10523	952	0	952	0.082963	973.792	27.5583	11033.4	1064.1	0.0878714	-0.00490843	2	0.973134
232	K07	UNC-AA-1-0017	1	treatment	A375	190219_IDG_21	72	13382	0.541007	0.25896	0.137795	0.0188892	0.0083145	0.0350339	12388	994	0	994	0.0742789	973.792	27.5583	11033.4	1064.1	0.0878714	-0.0135925	1	1.06724
232	K07	UNC-AA-1-0017	1	treatment	A375	190219_IDG_20	72	12286	0.529123	0.278563	0.132604	0.0187834	0.0139583	0.0269688	11606	680	0	680	0.0553476	973.792	27.5583	11033.4	1064.1	0.0878714	-0.0325238	2	1.0291
233	G14	VE-821	1	treatment	A375	190219_IDG_21	72	11843	0.660683	0.196912	0.104827	0.0184169	0	0.019161	10751	1092	0	1092	0.0922064	973.792	27.5583	11033.4	1064.1	0.0878714	0.00433497	1	0.985248
233	G14	VE-821	1	treatment	A375	190219_IDG_20	72	11269	0.647149	0.194049	0.105932	0.0149268	0.0251348	0.0128082	10384	885	0	885	0.078534	973.792	27.5583	11033.4	1064.1	0.0878714	-0.00933736	2	0.965657
234	E18	VE-822	1	treatment	A375	190219_IDG_21	72	4682	0.712524	0.0834915	0.142315	0.0398482	0	0.0218216	4216	466	0	466	0.0995301	973.792	27.5583	11033.4	1064.1	0.0878714	0.0116587	1	0.519597
234	E18	VE-822	1	treatment	A375	190219_IDG_20	72	4190	0.696771	0.0853859	0.160099	0.0388615	0	0.0188834	3654	536	0	536	0.127924	973.792	27.5583	11033.4	1064.1	0.0878714	0.0400522	2	0.458771
235	H13	Vertex 11e	1	treatment	A375	190219_IDG_21	72	4739	0.845717	0.104749	0.023631	0.00249943	0	0.0234038	4401	338	0	338	0.0713231	973.792	27.5583	11033.4	1064.1	0.0878714	-0.0165483	1	0.538346
235	H13	Vertex 11e	1	treatment	A375	190219_IDG_20	72	4617	0.861675	0.083275	0.0366223	0.0025659	0	0.0158619	4287	330	0	330	0.071475	973.792	27.5583	11033.4	1064.1	0.0878714	-0.0163964	2	0.526861
236	F22	WZ4003	1	treatment	A375	190219_IDG_21	72	10691	0.522902	0.278614	0.14394	0.0189534	0	0.0355902	9497	1194	0	1194	0.111683	973.792	27.5583	11033.4	1064.1	0.0878714	0.0238113	1	0.916174
236	F22	WZ4003	1	treatment	A375	190219_IDG_20	72	11701	0.54706	0.274914	0.134689	0.017373	0	0.0259641	10476	1225	0	1225	0.104692	973.792	27.5583	11033.4	1064.1	0.0878714	0.0168205	2	0.970614
237	I16	XMD-17-51	1	treatment	A375	190219_IDG_21	72	1212	0.100287	0.025788	0.326648	0.0830946	0	0.464183	1047	165	0	165	0.136139	973.792	27.5583	11033.4	1064.1	0.0878714	0.0482672	1	0.0209137
237	I16	XMD-17-51	1	treatment	A375	190219_IDG_20	72	1110	0.117271	0.00746269	0.359275	0.0895522	0	0.426439	938	172	0	172	0.154955	973.792	27.5583	11033.4	1064.1	0.0878714	0.0670836	2	-0.0106358
238	F14	XMD8-87	1	treatment	A375	190219_IDG_21	72	12127	0.542076	0.275421	0.131925	0.0139376	0.00762623	0.0290147	11408	719	0	719	0.0592892	973.792	27.5583	11033.4	1064.1	0.0878714	-0.0285822	1	1.01916
238	F14	XMD8-87	1	treatment	A375	190219_IDG_20	72	13537	0.550357	0.274563	0.124928	0.0202742	0	0.0298777	12183	1354	0	1354	0.100022	973.792	27.5583	11033.4	1064.1	0.0878714	0.0121508	2	1.05741
239	C20	XMD8-92	1	treatment	A375	190219_IDG_21	72	12661	0.560067	0.27434	0.118987	0.0214494	0	0.0251567	11329	1332	0	1332	0.105205	973.792	27.5583	11033.4	1064.1	0.0878714	0.0173336	1	1.01516
239	C20	XMD8-92	1	treatment	A375	190219_IDG_20	72	12846	0.559211	0.296224	0.114662	0.0135851	0	0.0163192	11704	1142	0	1142	0.0888993	973.792	27.5583	11033.4	1064.1	0.0878714	0.00102787	2	1.03398
0	H21	AH5015	1	treatment	A549	190226_IDG_38	72	3817	0.499568	0.316518	0.132891	0.0221966	0	0.0288268	3469	348	0	348	0.0911711	605.122	47.3292	3725.15	429.462	0.10361	-0.0124387	1	0.94639
1	H06	BI00007366	1	treatment	A549	190226_IDG_38	72	4154	0.51164	0.301058	0.122751	0.0322751	0.0121693	0.0201058	3780	374	0	374	0.0900337	605.122	47.3292	3725.15	429.462	0.10361	-0.013576	1	1.01118
2	I17	BI00009348	1	treatment	A549	190226_IDG_38	72	4115	0.475809	0.325581	0.133119	0.0312751	0.00267308	0.0315424	3741	374	0	374	0.090887	605.122	47.3292	3725.15	429.462	0.10361	-0.0127227	1	1.00324
3	M18	BI00036838	1	treatment	A549	190226_IDG_38	72	3274	0.397686	0.331526	0.174259	0.033261	0.0112075	0.0520607	2766	508	0	508	0.155162	605.122	47.3292	3725.15	429.462	0.10361	0.0515521	1	0.785334
4	K06	BI00047804	1	treatment	A549	190226_IDG_38	72	3917	0.477031	0.322129	0.133333	0.0296919	0.00532213	0.032493	3570	347	0	347	0.0885882	605.122	47.3292	3725.15	429.462	0.10361	-0.0150215	1	0.967811
5	G04	BI00113608	1	treatment	A549	190226_IDG_38	72	3863	0.521167	0.293478	0.124714	0.0300343	0	0.0306064	3496	367	0	367	0.0950039	605.122	47.3292	3725.15	429.462	0.10361	-0.00860585	1	0.952154
6	E10	BI00133844	1	treatment	A549	190226_IDG_38	72	3989	0.54241	0.261323	0.13725	0.0312929	0.00439198	0.0233324	3643	346	0	346	0.0867385	605.122	47.3292	3725.15	429.462	0.10361	-0.0168712	1	0.983062
7	H15	BI00601000	1	treatment	A549	190226_IDG_38	72	3776	0.483964	0.336897	0.124242	0.0277376	0.00404507	0.0231147	3461	315	0	315	0.0834216	605.122	47.3292	3725.15	429.462	0.10361	-0.0201881	1	0.944677
8	C21	BI00604564	1	treatment	A549	190226_IDG_38	72	4110	0.48184	0.332526	0.127253	0.0258273	0	0.0325531	3717	393	0	393	0.0956204	605.122	47.3292	3725.15	429.462	0.10361	-0.0079893	1	0.998329
9	L14	BI00614644	1	treatment	A549	190226_IDG_38	72	4866	0.467735	0.339817	0.11762	0.0306636	0.0141876	0.0299771	4370	496	0	496	0.101932	605.122	47.3292	3725.15	429.462	0.10361	-0.00167796	1	1.12556
10	G19	BI00645435	1	treatment	A549	190226_IDG_38	72	3357	0.470036	0.335925	0.13573	0.0275348	0	0.0307742	3087	270	0	270	0.080429	605.122	47.3292	3725.15	429.462	0.10361	-0.0231808	1	0.861684
11	F21	BI00801818	1	treatment	A549	190226_IDG_38	72	4110	0.499727	0.327322	0.121858	0.023224	0	0.0278689	3660	450	0	450	0.109489	605.122	47.3292	3725.15	429.462	0.10361	0.00587932	1	0.986586
12	K14	BI00865461	1	treatment	A549	190226_IDG_38	72	4784	0.442387	0.369913	0.128944	0.0253772	0.00617284	0.0272062	4374	410	0	410	0.0857023	605.122	47.3292	3725.15	429.462	0.10361	-0.0179074	1	1.12631
13	K21	BI01125081	1	treatment	A549	190226_IDG_38	72	4276	0.491463	0.329131	0.121355	0.0244287	0	0.0336223	3807	469	0	469	0.109682	605.122	47.3292	3725.15	429.462	0.10361	0.00607221	1	1.01665
14	K16	BI2536	1	treatment	A549	190226_IDG_38	72	535	0.12782	0.037594	0.285714	0.135338	0	0.413534	266	269	0	269	0.502804	605.122	47.3292	3725.15	429.462	0.10361	0.399194	1	-0.269098
15	K08	BIBF0846CL	1	treatment	A549	190226_IDG_38	72	4541	0.475958	0.321943	0.131804	0.0295338	0.0117159	0.0290456	4097	444	0	444	0.0977758	605.122	47.3292	3725.15	429.462	0.10361	-0.00583391	1	1.07391
16	E09	BIBW3133BS	1	treatment	A549	190226_IDG_38	72	4092	0.491557	0.313321	0.131332	0.0281426	0.0101849	0.0254623	3731	361	0	361	0.0882209	605.122	47.3292	3725.15	429.462	0.10361	-0.0153888	1	1.0012
17	K20	BIRB0876BS	1	treatment	A549	190226_IDG_38	72	4081	0.471799	0.338947	0.127239	0.0342155	0.00454424	0.0232558	3741	340	0	340	0.0833129	605.122	47.3292	3725.15	429.462	0.10361	-0.0202968	1	1.00324
18	F11	BIRZ0518XX	1	treatment	A549	190226_IDG_38	72	4232	0.487855	0.329716	0.125065	0.0299742	0.00516796	0.0222222	3870	362	0	362	0.0855388	605.122	47.3292	3725.15	429.462	0.10361	-0.018071	1	1.02931
19	F18	BMX-IN-1	1	treatment	A549	190226_IDG_38	72	4537	0.487799	0.32375	0.1295	0.0330998	0.00338246	0.0224692	4139	398	0	398	0.0877232	605.122	47.3292	3725.15	429.462	0.10361	-0.0158866	1	1.08199
20	F04	CA93.0	1	treatment	A549	190226_IDG_38	72	3940	0.484075	0.327293	0.127403	0.0299286	0.00521691	0.0260846	3642	298	0	298	0.0756345	605.122	47.3292	3725.15	429.462	0.10361	-0.0279752	1	0.982854
21	I04	CCT241533	1	treatment	A549	190226_IDG_38	72	4526	0.476576	0.339465	0.124601	0.0321315	0.00466029	0.0225656	4077	449	0	449	0.0992046	605.122	47.3292	3725.15	429.462	0.10361	-0.00440514	1	1.07004
22	D04	CCT244747	1	treatment	A549	190226_IDG_38	72	4294	0.521065	0.300336	0.127423	0.0276557	0.00542776	0.0180925	3869	425	0	425	0.0989753	605.122	47.3292	3725.15	429.462	0.10361	-0.00463442	1	1.02911
23	I18	CCT251545	1	treatment	A549	190226_IDG_38	72	2925	0.464286	0.276216	0.164514	0.0357143	0.0117781	0.0474924	2632	293	0	293	0.100171	605.122	47.3292	3725.15	429.462	0.10361	-0.00343879	1	0.75184
24	F03	CCT251921	1	treatment	A549	190226_IDG_38	72	3049	0.488691	0.279941	0.135336	0.0337412	0	0.0622914	2697	352	0	352	0.115448	605.122	47.3292	3725.15	429.462	0.10361	0.011838	1	0.768216
25	L06	D2202-1	1	treatment	A549	190226_IDG_38	72	4532	0.488338	0.33587	0.118095	0.0289713	0.0051559	0.0235699	4073	459	0	459	0.10128	605.122	47.3292	3725.15	429.462	0.10361	-0.00232995	1	1.06927
26	C19	DDR1-IN-1	1	treatment	A549	190226_IDG_38	72	3956	0.478562	0.326418	0.135823	0.0329184	0	0.0262794	3615	341	0	341	0.0861982	605.122	47.3292	3725.15	429.462	0.10361	-0.0174116	1	0.977235
79	C17	ERK5-IN-1	1	treatment	A549	190226_IDG_38	72	4407	0.46388	0.332817	0.142673	0.0288958	0.00851393	0.0232198	3876	531	0	531	0.12049	605.122	47.3292	3725.15	429.462	0.10361	0.0168804	1	1.03051
80	L04	FM-381	1	treatment	A549	190226_IDG_38	72	4628	0.502443	0.305813	0.120664	0.0307767	0.012213	0.0280899	4094	534	0	534	0.115385	605.122	47.3292	3725.15	429.462	0.10361	0.0117749	1	1.07333
81	E08	GNF-5	1	treatment	A549	190226_IDG_38	72	3970	0.435294	0.355404	0.136799	0.0309166	0.0123119	0.029275	3655	315	0	315	0.0793451	605.122	47.3292	3725.15	429.462	0.10361	-0.0242646	1	0.985551
82	F17	GR269666A	1	treatment	A549	190226_IDG_38	72	3997	0.490723	0.328314	0.130411	0.0244689	0	0.0260823	3719	278	0	278	0.0695522	605.122	47.3292	3725.15	429.462	0.10361	-0.0340576	1	0.998739
83	M21	GSK1070916	1	treatment	A549	190226_IDG_38	72	777	0.218597	0.00815661	0.290375	0.233279	0	0.249592	613	164	0	164	0.211068	605.122	47.3292	3725.15	429.462	0.10361	0.107458	1	0.00494548
84	C16	GSK1122999	1	treatment	A549	190226_IDG_38	72	4576	0.495665	0.317437	0.128854	0.0298651	0	0.0281792	4152	424	0	424	0.0926573	605.122	47.3292	3725.15	429.462	0.10361	-0.0109524	1	1.08448
85	L15	GSK114	1	treatment	A549	190226_IDG_38	72	4829	0.479916	0.333875	0.123288	0.025772	0.00626886	0.03088	4307	522	0	522	0.108097	605.122	47.3292	3725.15	429.462	0.10361	0.00448718	1	1.11383
86	M10	GSK1379710	1	treatment	A549	190226_IDG_38	72	4324	0.495265	0.299974	0.125672	0.0389045	0.0115178	0.0286665	3907	417	0	417	0.0964385	605.122	47.3292	3725.15	429.462	0.10361	-0.00717125	1	1.03669
87	M14	GSK1379712	1	treatment	A549	190226_IDG_38	72	4396	0.488724	0.306568	0.128625	0.0292441	0.0193309	0.0275093	4035	361	0	361	0.0821201	605.122	47.3292	3725.15	429.462	0.10361	-0.0214896	1	1.06188
88	H19	GSK1379761	1	treatment	A549	190226_IDG_38	72	3639	0.498058	0.313714	0.132357	0.0221094	0	0.0337616	3347	292	0	292	0.0802418	605.122	47.3292	3725.15	429.462	0.10361	-0.0233679	1	0.919994
89	H07	GSK1379762	1	treatment	A549	190226_IDG_38	72	3928	0.469325	0.347183	0.122978	0.0298383	0.00669269	0.0239822	3586	342	0	342	0.0870672	605.122	47.3292	3725.15	429.462	0.10361	-0.0165425	1	0.97117
90	H22	GSK1392956A	1	treatment	A549	190226_IDG_38	72	3573	0.497552	0.29743	0.137393	0.0309058	0	0.0367197	3268	305	0	305	0.0853624	605.122	47.3292	3725.15	429.462	0.10361	-0.0182473	1	0.902582
91	H08	GSK1398477	1	treatment	A549	190226_IDG_38	72	2722	0.520412	0.292905	0.125248	0.0245739	0	0.0368609	2523	199	0	199	0.073108	605.122	47.3292	3725.15	429.462	0.10361	-0.0305017	1	0.723808
92	J17	GSK1838705	1	treatment	A549	190226_IDG_38	72	3807	0.501154	0.31708	0.11483	0.0366417	0.00375072	0.0265436	3466	341	0	341	0.0895718	605.122	47.3292	3725.15	429.462	0.10361	-0.0140379	1	0.945748
93	L13	GSK1904529	1	treatment	A549	190226_IDG_38	72	3555	0.449193	0.324153	0.146882	0.0357708	0.00601456	0.0379867	3159	396	0	396	0.111392	605.122	47.3292	3725.15	429.462	0.10361	0.00778267	1	0.878126
94	G05	GSK190937	1	treatment	A549	190226_IDG_38	72	4202	0.473297	0.343594	0.121547	0.0299921	0.00762957	0.0239411	3801	401	0	401	0.0954307	605.122	47.3292	3725.15	429.462	0.10361	-0.00817899	1	1.01543
95	D18	GSK200398A	1	treatment	A549	190226_IDG_38	72	4029	0.523416	0.297245	0.127273	0.0236915	0	0.0283747	3630	399	0	399	0.099032	605.122	47.3292	3725.15	429.462	0.10361	-0.00457772	1	0.98036
96	F12	GSK204607	1	treatment	A549	190226_IDG_38	72	4647	0.496917	0.320209	0.12334	0.0258539	0.00925047	0.0244307	4216	431	0	431	0.092748	605.122	47.3292	3725.15	429.462	0.10361	-0.0108617	1	1.09668
97	M20	GSK204919	1	treatment	A549	190226_IDG_38	72	2781	0.504821	0.279985	0.139992	0.0404936	0.00539915	0.0293097	2593	188	0	188	0.0676016	605.122	47.3292	3725.15	429.462	0.10361	-0.0360082	1	0.741894
98	M08	GSK2219385	1	treatment	A549	190226_IDG_38	72	4327	0.479712	0.330252	0.128403	0.030303	0.00539291	0.0259373	3894	433	0	433	0.100069	605.122	47.3292	3725.15	429.462	0.10361	-0.0035404	1	1.0341
99	M11	GSK223675	1	treatment	A549	190226_IDG_38	72	4018	0.420104	0.378856	0.136568	0.0415945	0	0.0228769	2885	1133	0	1133	0.281981	605.122	47.3292	3725.15	429.462	0.10361	0.178371	1	0.814248
100	L08	GSK2250882	1	treatment	A549	190226_IDG_38	72	4259	0.5	0.32102	0.122008	0.0288762	0.00364204	0.0244537	3844	415	0	415	0.0974407	605.122	47.3292	3725.15	429.462	0.10361	-0.00616902	1	1.0241
101	I05	GSK2269557	1	treatment	A549	190226_IDG_38	72	4073	0.474275	0.335249	0.134373	0.0295567	0.00848385	0.0180624	3654	419	0	419	0.102873	605.122	47.3292	3725.15	429.462	0.10361	-0.000737158	1	0.985343
102	D14	GSK2283293	1	treatment	A549	190226_IDG_38	72	4681	0.519924	0.304554	0.113378	0.027277	0	0.0348672	4216	465	0	465	0.0993377	605.122	47.3292	3725.15	429.462	0.10361	-0.00427198	1	1.09668
103	I10	GSK2288359	1	treatment	A549	190226_IDG_38	72	4151	0.496723	0.328965	0.119004	0.0256881	0.00996068	0.0196592	3815	336	0	336	0.0809444	605.122	47.3292	3725.15	429.462	0.10361	-0.0226654	1	1.01826
104	I06	GSK2292767	1	treatment	A549	190226_IDG_38	72	3572	0.484998	0.325704	0.131457	0.0222703	0.00433034	0.0312403	3233	339	0	339	0.0949048	605.122	47.3292	3725.15	429.462	0.10361	-0.00870492	1	0.894785
105	C09	GSK2297428	1	treatment	A549	190226_IDG_38	72	3908	0.476628	0.326377	0.136617	0.0292154	0.00361714	0.0275459	3594	314	0	314	0.080348	605.122	47.3292	3725.15	429.462	0.10361	-0.0232617	1	0.972846
106	I09	GSK2298859	1	treatment	A549	190226_IDG_38	72	4056	0.497133	0.31395	0.123942	0.022659	0.012831	0.029484	3663	393	0	393	0.0968935	605.122	47.3292	3725.15	429.462	0.10361	-0.00671624	1	0.987207
107	G09	GSK2328680	1	treatment	A549	190226_IDG_38	72	4302	0.491273	0.326489	0.122947	0.0279774	0.00718686	0.0241273	3896	406	0	406	0.0943747	605.122	47.3292	3725.15	429.462	0.10361	-0.00923502	1	1.0345
108	J21	GSK2334470	1	treatment	A549	190226_IDG_38	72	4097	0.475129	0.343028	0.124762	0.0266377	0	0.0304431	3679	418	0	418	0.102026	605.122	47.3292	3725.15	429.462	0.10361	-0.00158386	1	0.990513
109	C04	GSK2336394	1	treatment	A549	190226_IDG_38	72	3994	0.512277	0.295201	0.135324	0.0270647	0	0.0301339	3584	410	0	410	0.102654	605.122	47.3292	3725.15	429.462	0.10361	-0.000955752	1	0.970751
110	C05	GSK2373690	1	treatment	A549	190226_IDG_38	72	3781	0.513091	0.30003	0.121878	0.0309961	0.00962985	0.0243756	3323	458	0	458	0.121132	605.122	47.3292	3725.15	429.462	0.10361	0.0175222	1	0.914731
111	G17	GSK2376236	1	treatment	A549	190226_IDG_38	72	3679	0.455539	0.349014	0.133232	0.0333839	0	0.0288316	3295	384	0	384	0.104376	605.122	47.3292	3725.15	429.462	0.10361	0.000766456	1	0.908562
112	F08	GSK237701A	1	treatment	A549	190226_IDG_38	72	466	0.199115	0.0442478	0.318584	0.199115	0	0.238938	226	240	0	240	0.515021	605.122	47.3292	3725.15	429.462	0.10361	0.411412	1	-0.313141
113	J19	GSK2578215	1	treatment	A549	190226_IDG_38	72	4151	0.52469	0.302086	0.118035	0.0287827	0	0.0264061	3787	364	0	364	0.0876897	605.122	47.3292	3725.15	429.462	0.10361	-0.01592	1	1.0126
114	L07	GSK2606414	1	treatment	A549	190226_IDG_38	72	4519	0.479115	0.333168	0.130283	0.0273496	0	0.0300845	4022	497	0	497	0.10998	605.122	47.3292	3725.15	429.462	0.10361	0.00637035	1	1.05935
115	F07	GSK2656157	1	treatment	A549	190226_IDG_38	72	4119	0.480805	0.317448	0.144824	0.0248875	0.00529521	0.0267408	3777	342	0	342	0.0830299	605.122	47.3292	3725.15	429.462	0.10361	-0.0205799	1	1.01057
116	C08	GSK270822A	1	treatment	A549	190226_IDG_38	72	5304	0.484998	0.356556	0.124949	0.0178792	0	0.0156186	4866	438	0	438	0.0825792	605.122	47.3292	3725.15	429.462	0.10361	-0.0210305	1	1.21453
117	G21	GSK2850163	1	treatment	A549	190226_IDG_38	72	3729	0.464476	0.334813	0.138247	0.0349319	0	0.0275311	3378	351	0	351	0.0941271	605.122	47.3292	3725.15	429.462	0.10361	-0.00948262	1	0.926757
118	G20	GSK299115A	1	treatment	A549	190226_IDG_38	72	4213	0.467043	0.360605	0.130033	0.0235958	0	0.0187227	3899	314	0	314	0.0745312	605.122	47.3292	3725.15	429.462	0.10361	-0.0290785	1	1.0351
119	D11	GSK312879	1	treatment	A549	190226_IDG_38	72	4228	0.475214	0.324682	0.139891	0.0254347	0.0075266	0.0272515	3853	375	0	375	0.0886944	605.122	47.3292	3725.15	429.462	0.10361	-0.0149153	1	1.02591
120	D12	GSK336313	1	treatment	A549	190226_IDG_38	72	4036	0.516903	0.288713	0.138768	0.0258997	0	0.0297165	3668	368	0	368	0.0911794	605.122	47.3292	3725.15	429.462	0.10361	-0.0124303	1	0.988241
121	D17	GSK461364	1	treatment	A549	190226_IDG_38	72	491	0.174242	0.0454545	0.32197	0.212121	0	0.246212	264	227	0	227	0.462322	605.122	47.3292	3725.15	429.462	0.10361	0.358712	1	-0.271199
122	L10	GSK481	1	treatment	A549	190226_IDG_38	72	4447	0.508948	0.288551	0.137043	0.0321157	0.00490316	0.0284383	4079	368	0	368	0.0827524	605.122	47.3292	3725.15	429.462	0.10361	-0.0208573	1	1.07043
123	I08	GSK579289A	1	treatment	A549	190226_IDG_38	72	547	0.217857	0.0285714	0.389286	0.175	0	0.189286	280	267	0	267	0.488117	605.122	47.3292	3725.15	429.462	0.10361	0.384507	1	-0.254659
124	D22	GSK583	1	treatment	A549	190226_IDG_38	72	3906	0.489616	0.320626	0.13542	0.027027	0.00369844	0.0236131	3515	391	0	391	0.100102	605.122	47.3292	3725.15	429.462	0.10361	-0.00350733	1	0.956194
125	M15	GSK840	1	treatment	A549	190226_IDG_38	72	4205	0.495585	0.305188	0.135762	0.0339404	0	0.0295254	3624	581	0	581	0.138169	605.122	47.3292	3725.15	429.462	0.10361	0.0345591	1	0.979111
126	M16	GSK843	1	treatment	A549	190226_IDG_38	72	4256	0.458257	0.338688	0.122992	0.0360811	0.0152752	0.0287069	3797	459	0	459	0.107848	605.122	47.3292	3725.15	429.462	0.10361	0.00423801	1	1.01462
127	J18	GSK872	1	treatment	A549	190226_IDG_38	72	3589	0.460947	0.342251	0.132534	0.0242927	0	0.0399754	3252	337	0	337	0.093898	605.122	47.3292	3725.15	429.462	0.10361	-0.00971171	1	0.899024
128	G18	GSK949675	1	treatment	A549	190226_IDG_38	72	4040	0.489356	0.329291	0.123956	0.0301805	0	0.0272164	3711	329	0	329	0.0814356	605.122	47.3292	3725.15	429.462	0.10361	-0.0221741	1	0.997098
129	F06	GW276655	1	treatment	A549	190226_IDG_38	72	3921	0.455446	0.35389	0.135785	0.0294201	0	0.0254597	3535	386	0	386	0.0984443	605.122	47.3292	3725.15	429.462	0.10361	-0.00516546	1	0.960431
130	L03	GW280670X	1	treatment	A549	190226_IDG_38	72	3876	0.50357	0.309626	0.126821	0.027992	0.00485576	0.0271351	3501	375	0	375	0.0967492	605.122	47.3292	3725.15	429.462	0.10361	-0.00686051	1	0.953218
131	I07	GW282449A	1	treatment	A549	190226_IDG_38	72	4063	0.533261	0.293348	0.116685	0.0288986	0.00599782	0.0218103	3668	395	0	395	0.0972188	605.122	47.3292	3725.15	429.462	0.10361	-0.00639093	1	0.988241
132	J22	GW282974X	1	treatment	A549	190226_IDG_38	72	3464	0.502855	0.30552	0.134518	0.0279188	0.00475888	0.0244289	3152	312	0	312	0.0900693	605.122	47.3292	3725.15	429.462	0.10361	-0.0135404	1	0.876538
133	M09	GW296115X	1	treatment	A549	190226_IDG_38	72	4835	0.492679	0.312592	0.126403	0.0373353	0	0.0309907	4098	737	0	737	0.15243	605.122	47.3292	3725.15	429.462	0.10361	0.0488205	1	1.0741
134	F15	GW300657X	1	treatment	A549	190226_IDG_38	72	3969	0.466848	0.336957	0.133967	0.0266304	0.00923913	0.0263587	3680	289	0	289	0.0728143	605.122	47.3292	3725.15	429.462	0.10361	-0.0307954	1	0.990719
135	C15	GW300660X	1	treatment	A549	190226_IDG_38	72	4614	0.494387	0.322188	0.121567	0.0272271	0	0.034631	4187	427	0	427	0.0925444	605.122	47.3292	3725.15	429.462	0.10361	-0.0110653	1	1.09117
136	H03	GW305074X (also GW5074)	1	treatment	A549	190226_IDG_38	72	3886	0.493506	0.34218	0.111801	0.0302089	0.00451722	0.0177866	3542	344	0	344	0.0885229	605.122	47.3292	3725.15	429.462	0.10361	-0.0150868	1	0.961911
137	E05	GW335962X	1	treatment	A549	190226_IDG_38	72	3710	0.476613	0.319124	0.142392	0.0328597	0.00592066	0.0230906	3378	332	0	332	0.0894879	605.122	47.3292	3725.15	429.462	0.10361	-0.0141219	1	0.926757
138	C12	GW406108X	1	treatment	A549	190226_IDG_38	72	4295	0.458015	0.361069	0.126463	0.0282443	0.00407125	0.0221374	3930	365	0	365	0.0849825	605.122	47.3292	3725.15	429.462	0.10361	-0.0186272	1	1.04125
139	E17	GW412617	1	treatment	A549	190226_IDG_38	72	4027	0.486735	0.327287	0.13346	0.0281538	0	0.0243638	3694	333	0	333	0.0826918	605.122	47.3292	3725.15	429.462	0.10361	-0.0209179	1	0.993604
140	D06	GW416981X	1	treatment	A549	190226_IDG_38	72	3388	0.472538	0.316542	0.147221	0.0279493	0	0.0357491	3077	311	0	311	0.0917946	605.122	47.3292	3725.15	429.462	0.10361	-0.0118152	1	0.859381
141	G06	GW429374	1	treatment	A549	190226_IDG_38	72	4558	0.470122	0.354932	0.12479	0.0266379	0	0.0235181	4167	391	0	391	0.0857832	605.122	47.3292	3725.15	429.462	0.10361	-0.0178265	1	1.08735
142	G07	GW429374A	1	treatment	A549	190226_IDG_38	72	4260	0.469245	0.340254	0.130029	0.0285492	0	0.0319232	3853	407	0	407	0.0955399	605.122	47.3292	3725.15	429.462	0.10361	-0.00806983	1	1.02591
143	K05	GW434756X	1	treatment	A549	190226_IDG_38	72	4207	0.453822	0.348992	0.125265	0.0360934	0.013535	0.022293	3768	439	0	439	0.10435	605.122	47.3292	3725.15	429.462	0.10361	0.00074016	1	1.00874
144	M19	GW435821X	1	treatment	A549	190226_IDG_38	72	4622	0.470789	0.336904	0.114654	0.038705	0.00803311	0.0309153	4108	514	0	514	0.111207	605.122	47.3292	3725.15	429.462	0.10361	0.00759754	1	1.07603
145	H17	GW440135	1	treatment	A549	190226_IDG_38	72	3917	0.491262	0.327878	0.120388	0.0302358	0	0.0302358	3605	312	0	312	0.0796528	605.122	47.3292	3725.15	429.462	0.10361	-0.0239569	1	0.975147
146	G08	GW440146	1	treatment	A549	190226_IDG_38	72	4091	0.490054	0.333065	0.124194	0.0327957	0	0.0198925	3720	371	0	371	0.0906869	605.122	47.3292	3725.15	429.462	0.10361	-0.0129229	1	0.998944
147	H18	GW442130X	1	treatment	A549	190226_IDG_38	72	4023	0.4967	0.328658	0.125963	0.029703	0	0.0189769	3636	387	0	387	0.0961969	605.122	47.3292	3725.15	429.462	0.10361	-0.00741287	1	0.981608
148	E16	GW513184X	1	treatment	A549	190226_IDG_38	72	4259	0.46933	0.354897	0.119588	0.0257732	0	0.0304124	3880	379	0	379	0.088988	605.122	47.3292	3725.15	429.462	0.10361	-0.0146217	1	1.03131
149	J08	GW525701	1	treatment	A549	190226_IDG_38	72	623	0.130734	0.0298165	0.497706	0.0894495	0	0.252294	436	187	0	187	0.300161	605.122	47.3292	3725.15	429.462	0.10361	0.196551	1	-0.117516
150	H14	GW560459	1	treatment	A549	190226_IDG_38	72	4145	0.48219	0.338921	0.121792	0.0337873	0	0.0233106	3818	327	0	327	0.0788902	605.122	47.3292	3725.15	429.462	0.10361	-0.0247195	1	1.01887
151	E15	GW569293E	1	treatment	A549	190226_IDG_38	72	4345	0.478791	0.320803	0.135636	0.0365761	0.00508001	0.023114	3937	408	0	408	0.093901	605.122	47.3292	3725.15	429.462	0.10361	-0.0097087	1	1.04264
152	D10	GW572399X	1	treatment	A549	190226_IDG_38	72	3682	0.492895	0.307578	0.13884	0.0272351	0.00503256	0.0284192	3378	304	0	304	0.0825638	605.122	47.3292	3725.15	429.462	0.10361	-0.0210459	1	0.926757
153	L22	GW576924A	1	treatment	A549	190226_IDG_38	72	3879	0.501722	0.311424	0.129736	0.033008	0	0.0241102	3484	395	0	395	0.10183	605.122	47.3292	3725.15	429.462	0.10361	-0.00177936	1	0.949596
154	N13	GW578748X	1	treatment	A549	190226_IDG_38	72	4498	0.49481	0.319328	0.115175	0.0336134	0	0.0370737	4046	452	0	452	0.100489	605.122	47.3292	3725.15	429.462	0.10361	-0.00312063	1	1.06402
155	J07	GW580509X	1	treatment	A549	190226_IDG_38	72	4580	0.503867	0.321653	0.120348	0.0277912	0	0.0263412	4138	442	0	442	0.0965066	605.122	47.3292	3725.15	429.462	0.10361	-0.00710318	1	1.0818
156	G16	GW621970X	1	treatment	A549	190226_IDG_38	72	4518	0.466362	0.353676	0.124219	0.0305142	0	0.0252283	4162	356	0	356	0.0787959	605.122	47.3292	3725.15	429.462	0.10361	-0.0248138	1	1.0864
157	K15	GW632580X	1	treatment	A549	190226_IDG_38	72	4152	0.490405	0.306503	0.127932	0.032516	0.016791	0.0258529	3752	400	0	400	0.0963391	605.122	47.3292	3725.15	429.462	0.10361	-0.00727062	1	1.00548
158	M05	GW642138X	1	treatment	A549	190226_IDG_38	72	3998	0.555461	0.276028	0.110355	0.0289362	0	0.0292199	3525	473	0	473	0.118309	605.122	47.3292	3725.15	429.462	0.10361	0.0146994	1	0.958314
159	K17	GW651576X	1	treatment	A549	190226_IDG_38	72	4124	0.5	0.298667	0.133867	0.0282667	0.012	0.0272	3750	374	0	374	0.0906887	605.122	47.3292	3725.15	429.462	0.10361	-0.0129211	1	1.00508
160	M06	GW683134A	1	treatment	A549	190226_IDG_38	72	4685	0.456996	0.357394	0.124678	0.026951	0.0110148	0.022967	4267	418	0	418	0.0892209	605.122	47.3292	3725.15	429.462	0.10361	-0.0143888	1	1.10632
161	M04	GW684088	1	treatment	A549	190226_IDG_38	72	4869	0.460573	0.372984	0.113351	0.0271057	0	0.0259857	4464	405	0	405	0.0831793	605.122	47.3292	3725.15	429.462	0.10361	-0.0204304	1	1.14289
162	N09	GW693917A	1	treatment	A549	190226_IDG_38	72	4611	0.439544	0.355798	0.122894	0.0361744	0	0.0455897	4036	575	0	575	0.124702	605.122	47.3292	3725.15	429.462	0.10361	0.0210921	1	1.06208
163	N04	GW709042A	1	treatment	A549	190226_IDG_38	72	4895	0.452581	0.372299	0.119172	0.0243348	0	0.0316125	4397	498	0	498	0.101736	605.122	47.3292	3725.15	429.462	0.10361	-0.00187327	1	1.13056
164	N12	GW770249X	1	treatment	A549	190226_IDG_38	72	3953	0.459157	0.333907	0.139582	0.0255087	0	0.0418458	3489	464	0	464	0.117379	605.122	47.3292	3725.15	429.462	0.10361	0.0137695	1	0.950662
165	J06	GW780159X	1	treatment	A549	190226_IDG_38	72	4457	0.47207	0.360827	0.110055	0.0249584	0.00903256	0.0230568	4207	250	0	250	0.0560915	605.122	47.3292	3725.15	429.462	0.10361	-0.0475182	1	1.09497
166	J04	GW784752X	1	treatment	A549	190226_IDG_38	72	4386	0.417476	0.374808	0.144098	0.0298927	0.00689831	0.0268268	3914	472	0	472	0.107615	605.122	47.3292	3725.15	429.462	0.10361	0.00400541	1	1.03808
167	L21	GW792479	1	treatment	A549	190226_IDG_38	72	4336	0.43939	0.392402	0.109223	0.0269933	0	0.031992	4001	335	0	335	0.0772601	605.122	47.3292	3725.15	429.462	0.10361	-0.0263496	1	1.05524
168	N10	GW807982X	1	treatment	A549	190226_IDG_38	72	4227	0.460263	0.323421	0.137368	0.0402632	0.00842105	0.0302632	3800	427	0	427	0.101017	605.122	47.3292	3725.15	429.462	0.10361	-0.00259246	1	1.01523
169	D08	GW810372X	1	treatment	A549	190226_IDG_38	72	4127	0.510661	0.309818	0.12319	0.0276389	0	0.0286918	3799	328	0	328	0.0794766	605.122	47.3292	3725.15	429.462	0.10361	-0.0241331	1	1.01503
170	I15	GW811761X	1	treatment	A549	190226_IDG_38	72	4509	0.509751	0.309118	0.124086	0.0258411	0.00463189	0.0265724	4102	407	0	407	0.0902639	605.122	47.3292	3725.15	429.462	0.10361	-0.0133458	1	1.07487
171	K04	GW814408X	1	treatment	A549	190226_IDG_38	72	3215	0.398148	0.325142	0.181624	0.0381054	0.0149573	0.0420228	2808	407	0	407	0.126594	605.122	47.3292	3725.15	429.462	0.10361	0.0229844	1	0.795625
172	K09	GW830263A	1	treatment	A549	190226_IDG_38	72	4313	0.484555	0.314526	0.127649	0.035231	0.0155731	0.0224662	3917	396	0	396	0.0918154	605.122	47.3292	3725.15	429.462	0.10361	-0.0117943	1	1.03867
173	N16	GW830900A	1	treatment	A549	190226_IDG_38	72	4275	0.463535	0.332987	0.12925	0.0384116	0.0075266	0.0282896	3853	422	0	422	0.0987135	605.122	47.3292	3725.15	429.462	0.10361	-0.00489628	1	1.02591
174	N21	GW832467	1	treatment	A549	190226_IDG_38	72	4262	0.479741	0.307942	0.134252	0.0297137	0.0202593	0.0280929	3702	560	0	560	0.131394	605.122	47.3292	3725.15	429.462	0.10361	0.027784	1	0.99525
175	E14	GW855857	1	treatment	A549	190226_IDG_38	72	2869	0.528523	0.258028	0.146581	0.0381564	0.00453343	0.0241783	2647	222	0	222	0.0773789	605.122	47.3292	3725.15	429.462	0.10361	-0.0262309	1	0.755641
176	D03	GW867253	1	treatment	A549	190226_IDG_38	72	4279	0.487913	0.334286	0.120354	0.0304133	0	0.0270341	3847	432	0	432	0.100958	605.122	47.3292	3725.15	429.462	0.10361	-0.00265157	1	1.0247
177	D07	GW868318	1	treatment	A549	190226_IDG_38	72	3970	0.507633	0.296142	0.13461	0.0288648	0	0.0327505	3603	367	0	367	0.0924433	605.122	47.3292	3725.15	429.462	0.10361	-0.0111664	1	0.974729
178	E11	HG-10-102-01	1	treatment	A549	190226_IDG_38	72	4212	0.461438	0.339979	0.132476	0.0296432	0.00419727	0.0322665	3812	400	0	400	0.0949668	605.122	47.3292	3725.15	429.462	0.10361	-0.00864297	1	1.01766
179	G11	HTH-01-015	1	treatment	A549	190226_IDG_38	72	4599	0.507372	0.311095	0.125695	0.0282814	0.00265893	0.0248973	4137	462	0	462	0.100457	605.122	47.3292	3725.15	429.462	0.10361	-0.00315311	1	1.08161
180	H10	JH-II-127	1	treatment	A549	190226_IDG_38	72	2157	0.542269	0.102336	0.219132	0.0717464	0	0.0645161	1798	359	0	359	0.166435	605.122	47.3292	3725.15	429.462	0.10361	0.0628251	1	0.514873
181	C10	JNK-IN-7	1	treatment	A549	190226_IDG_38	72	4430	0.486889	0.332577	0.125567	0.0254665	0.00504286	0.0244579	3966	464	0	464	0.10474	605.122	47.3292	3725.15	429.462	0.10361	0.00113067	1	1.04836
182	L11	K05908	1	treatment	A549	190226_IDG_38	72	4477	0.471615	0.298353	0.151634	0.028754	0.0147456	0.034898	4069	408	0	408	0.0911325	605.122	47.3292	3725.15	429.462	0.10361	-0.0124773	1	1.06849
183	D19	NVP-2	1	treatment	A549	190226_IDG_38	72	3618	0.463025	0.334765	0.137465	0.0309911	0.00552317	0.0282295	3259	359	0	359	0.0992261	605.122	47.3292	3725.15	429.462	0.10361	-0.00438364	1	0.900582
184	G10	NVS-PAK1-1	1	treatment	A549	190226_IDG_38	72	4191	0.521002	0.316462	0.117923	0.0250457	0	0.0195669	3833	358	0	358	0.0854211	605.122	47.3292	3725.15	429.462	0.10361	-0.0181886	1	1.02189
185	C06	PFE-PKIS 1	1	treatment	A549	190226_IDG_38	72	3890	0.466591	0.341697	0.13307	0.0321398	0	0.0265013	3547	343	0	343	0.0881748	605.122	47.3292	3725.15	429.462	0.10361	-0.0154349	1	0.962967
186	E06	PFE-PKIS 12	1	treatment	A549	190226_IDG_38	72	4251	0.465778	0.33908	0.129049	0.0318704	0.00548589	0.0287356	3828	423	0	423	0.099506	605.122	47.3292	3725.15	429.462	0.10361	-0.00410373	1	1.02088
187	E07	PFE-PKIS 21 (PD 0325901)	1	treatment	A549	190226_IDG_38	72	997	0.757921	0.0367554	0.120406	0.0519645	0	0.0329531	789	208	0	208	0.208626	605.122	47.3292	3725.15	429.462	0.10361	0.105016	1	0.106494
188	I11	PFE-PKIS 25	1	treatment	A549	190226_IDG_38	72	4408	0.484481	0.325763	0.122382	0.0325511	0.0118597	0.0229624	3963	445	0	445	0.100953	605.122	47.3292	3725.15	429.462	0.10361	-0.00265692	1	1.04777
189	N20	PFE-PKIS 29	1	treatment	A549	190226_IDG_38	72	1024	0.491614	0.148847	0.156184	0.033543	0.109015	0.0607966	954	70	0	70	0.0683594	605.122	47.3292	3725.15	429.462	0.10361	-0.0352504	1	0.189604
190	M17	PFE-PKIS 3	1	treatment	A549	190226_IDG_38	72	4188	0.497062	0.313568	0.116987	0.0331197	0.00614316	0.0331197	3744	444	0	444	0.106017	605.122	47.3292	3725.15	429.462	0.10361	0.00240746	1	1.00385
191	L12	PFE-PKIS 32	1	treatment	A549	190226_IDG_38	72	2962	0.570379	0.226755	0.14039	0.0327086	0.00477766	0.0249908	2721	241	0	241	0.0813639	605.122	47.3292	3725.15	429.462	0.10361	-0.0222458	1	0.774201
192	I14	PFE-PKIS 34	1	treatment	A549	190226_IDG_38	72	4225	0.507163	0.299036	0.129721	0.0312581	0.00651211	0.0263089	3839	386	0	386	0.0913609	605.122	47.3292	3725.15	429.462	0.10361	-0.0122488	1	1.02309
193	C13	PFE-PKIS 39	1	treatment	A549	190226_IDG_38	72	4123	0.445484	0.340994	0.143506	0.030465	0.0128274	0.0267237	3742	381	0	381	0.0924084	605.122	47.3292	3725.15	429.462	0.10361	-0.0112013	1	1.00344
194	E04	PFE-PKIS 40	1	treatment	A549	190226_IDG_38	72	1453	0.565323	0.204839	0.130645	0.0596774	0	0.0395161	1240	213	0	213	0.146593	605.122	47.3292	3725.15	429.462	0.10361	0.0429835	1	0.314717
195	H12	PFE-PKIS 41	1	treatment	A549	190226_IDG_38	72	3818	0.476494	0.335171	0.130296	0.0275682	0	0.0304701	3446	372	0	372	0.0974332	605.122	47.3292	3725.15	429.462	0.10361	-0.00617652	1	0.941458
196	F13	PFE-PKIS 44	1	treatment	A549	190226_IDG_38	72	2982	0.587697	0.21677	0.127792	0.032955	0.00988649	0.0248993	2731	251	0	251	0.0841717	605.122	47.3292	3725.15	429.462	0.10361	-0.019438	1	0.776685
197	F19	SB-216385	1	treatment	A549	190226_IDG_38	72	4029	0.473756	0.333968	0.132989	0.0310035	0.00380745	0.0244765	3677	352	0	352	0.0873666	605.122	47.3292	3725.15	429.462	0.10361	-0.0162431	1	0.9901
198	G15	SB-219980	1	treatment	A549	190226_IDG_38	72	4548	0.48353	0.326761	0.128396	0.0295744	0	0.0317384	4159	389	0	389	0.0855321	605.122	47.3292	3725.15	429.462	0.10361	-0.0180776	1	1.08582
199	N06	SB-242719	1	treatment	A549	190226_IDG_38	72	4232	0.480513	0.317939	0.136679	0.0325681	0	0.0323011	3746	486	0	486	0.114839	605.122	47.3292	3725.15	429.462	0.10361	0.0112296	1	1.00426
200	J10	SB-282975	1	treatment	A549	190226_IDG_38	72	4460	0.505478	0.31997	0.128237	0.0266434	0	0.0196713	4016	444	0	444	0.0995516	605.122	47.3292	3725.15	429.462	0.10361	-0.00405816	1	1.05817
201	L17	SB-517081	1	treatment	A549	190226_IDG_38	72	4282	0.492161	0.325366	0.122848	0.0254433	0.00591108	0.0282704	3891	391	0	391	0.0913125	605.122	47.3292	3725.15	429.462	0.10361	-0.0122973	1	1.0335
202	E20	SB-590885	1	treatment	A549	190226_IDG_38	72	4418	0.412182	0.408513	0.123532	0.0242172	0	0.0315558	4088	330	0	330	0.0746944	605.122	47.3292	3725.15	429.462	0.10361	-0.0289153	1	1.07217
203	J03	SB-633825	1	treatment	A549	190226_IDG_38	72	4501	0.448309	0.381416	0.117733	0.0274872	0	0.0250547	4111	390	0	390	0.0866474	605.122	47.3292	3725.15	429.462	0.10361	-0.0169623	1	1.07661
204	I21	SB-693162/GW549034	1	treatment	A549	190226_IDG_38	72	4052	0.471765	0.313596	0.136513	0.0282346	0.00630482	0.0435855	3648	404	0	404	0.0997038	605.122	47.3292	3725.15	429.462	0.10361	-0.00390588	1	0.984099
205	I20	SB-708998	1	treatment	A549	190226_IDG_38	72	4204	0.454777	0.366624	0.122803	0.0290446	0	0.0267516	3925	279	0	279	0.0663654	605.122	47.3292	3725.15	429.462	0.10361	-0.0372444	1	1.04026
206	N05	SB-710397	1	treatment	A549	190226_IDG_38	72	4694	0.457338	0.353974	0.12433	0.0333983	0	0.0309605	4102	592	0	592	0.126118	605.122	47.3292	3725.15	429.462	0.10361	0.0225087	1	1.07487
207	D15	SB-725317	1	treatment	A549	190226_IDG_38	72	4220	0.372606	0.371155	0.18108	0.0362739	0	0.0388857	3446	774	0	774	0.183412	605.122	47.3292	3725.15	429.462	0.10361	0.0798026	1	0.941458
208	N08	SB-732932	1	treatment	A549	190226_IDG_38	72	4321	0.467469	0.334785	0.131404	0.0317623	0.00589139	0.0286885	3904	417	0	417	0.0965054	605.122	47.3292	3725.15	429.462	0.10361	-0.00710429	1	1.03609
209	L19	SB-733894	1	treatment	A549	190226_IDG_38	72	4616	0.487155	0.322074	0.129638	0.0268792	0.0128449	0.0214082	4204	412	0	412	0.0892548	605.122	47.3292	3725.15	429.462	0.10361	-0.014355	1	1.0944
210	J11	SB-735464	1	treatment	A549	190226_IDG_38	72	3835	0.45522	0.343982	0.134341	0.0268112	0.00285225	0.0367941	3506	329	0	329	0.0857888	605.122	47.3292	3725.15	429.462	0.10361	-0.0178209	1	0.954282
211	K18	SB-742609	1	treatment	A549	190226_IDG_38	72	4356	0.487528	0.326027	0.127992	0.0294785	0	0.0289746	3969	387	0	387	0.088843	605.122	47.3292	3725.15	429.462	0.10361	-0.0147668	1	1.04895
212	F10	SB-747651A	1	treatment	A549	190226_IDG_38	72	4650	0.497779	0.32289	0.13444	0.0261866	0	0.0187047	4277	373	0	373	0.0802151	605.122	47.3292	3725.15	429.462	0.10361	-0.0233947	1	1.1082
213	N19	SB-772077-B	1	treatment	A549	190226_IDG_38	72	4542	0.474897	0.373029	0.105991	0.0203735	0	0.0257094	4123	419	0	419	0.0922501	605.122	47.3292	3725.15	429.462	0.10361	-0.0113596	1	1.07892
214	J15	TH257	1	treatment	A549	190226_IDG_38	72	4134	0.508739	0.302232	0.13794	0.0260823	0	0.0250067	3719	415	0	415	0.100387	605.122	47.3292	3725.15	429.462	0.10361	-0.0032227	1	0.998739
215	M07	THZ1	1	treatment	A549	190226_IDG_38	72	780	0.387302	0.0126984	0.0920635	0.396825	0	0.111111	315	465	0	465	0.596154	605.122	47.3292	3725.15	429.462	0.10361	0.492544	1	-0.220414
216	J14	THZ531	1	treatment	A549	190226_IDG_38	72	3964	0.452112	0.355506	0.122274	0.0328457	0.0115926	0.0256693	3623	341	0	341	0.0860242	605.122	47.3292	3725.15	429.462	0.10361	-0.0175855	1	0.978903
217	K10	TPKI-100	1	treatment	A549	190226_IDG_38	72	4552	0.482056	0.334384	0.125606	0.028128	0.00412221	0.0257032	4124	428	0	428	0.0940246	605.122	47.3292	3725.15	429.462	0.10361	-0.00958513	1	1.07911
218	I19	TPKI-105	1	treatment	A549	190226_IDG_38	72	3727	0.464018	0.325849	0.139609	0.0302245	0.00489349	0.0354059	3474	253	0	253	0.067883	605.122	47.3292	3725.15	429.462	0.10361	-0.0357267	1	0.94746
219	L18	TPKI-106	1	treatment	A549	190226_IDG_38	72	4339	0.486431	0.318228	0.135433	0.0299539	0	0.0299539	3906	433	0	433	0.0997926	605.122	47.3292	3725.15	429.462	0.10361	-0.00381715	1	1.03649
220	N17	TPKI-16	1	treatment	A549	190226_IDG_38	72	1016	0.69181	0.0323276	0.0840517	0.159483	0	0.0323276	464	552	0	552	0.543307	605.122	47.3292	3725.15	429.462	0.10361	0.439697	1	-0.0963162
221	N15	TPKI-24	1	treatment	A549	190226_IDG_38	72	488	0.417112	0	0.112299	0.385027	0	0.0855615	187	301	0	301	0.616803	605.122	47.3292	3725.15	429.462	0.10361	0.513194	1	-0.361013
222	K11	TPKI-26	1	treatment	A549	190226_IDG_38	72	660	0.246154	0.00512821	0.302564	0.274359	0	0.171795	390	270	0	270	0.409091	605.122	47.3292	3725.15	429.462	0.10361	0.305481	1	-0.154255
223	J12	TPKI-39	1	treatment	A549	190226_IDG_38	72	3776	0.454441	0.325956	0.146019	0.0319057	0	0.0416786	3479	297	0	297	0.0786547	605.122	47.3292	3725.15	429.462	0.10361	-0.0249551	1	0.948528
224	K19	TPKI-58	1	treatment	A549	190226_IDG_38	72	4012	0.4989	0.30363	0.126238	0.0269527	0.0107261	0.0335534	3636	376	0	376	0.0937188	605.122	47.3292	3725.15	429.462	0.10361	-0.00989089	1	0.981608
225	J13	TPKI-69	1	treatment	A549	190226_IDG_38	72	4271	0.46733	0.335375	0.130168	0.0344564	0.00510465	0.0275651	3918	353	0	353	0.0826504	605.122	47.3292	3725.15	429.462	0.10361	-0.0209593	1	1.03887
226	D13	TPKI-72	1	treatment	A549	190226_IDG_38	72	4384	0.47642	0.326318	0.133621	0.0266227	0.00836714	0.0286511	3944	440	0	440	0.100365	605.122	47.3292	3725.15	429.462	0.10361	-0.00324477	1	1.04402
227	D21	TPKI-85	1	treatment	A549	190226_IDG_38	72	4390	0.476046	0.320474	0.136914	0.033535	0	0.0330308	3966	424	0	424	0.0965831	605.122	47.3292	3725.15	429.462	0.10361	-0.00702659	1	1.04836
228	H04	TPKI-91	1	treatment	A549	190226_IDG_38	72	4190	0.463983	0.341896	0.121028	0.0307203	0.0137712	0.0286017	3776	414	0	414	0.0988067	605.122	47.3292	3725.15	429.462	0.10361	-0.00480305	1	1.01037
229	E19	TPKI-97	1	treatment	A549	190226_IDG_38	72	4201	0.45955	0.346601	0.132334	0.028948	0	0.0325666	3869	332	0	332	0.0790288	605.122	47.3292	3725.15	429.462	0.10361	-0.0245809	1	1.02911
230	E21	TX-85-1	1	treatment	A549	190226_IDG_38	72	3897	0.45041	0.342752	0.14863	0.0276914	0	0.0305171	3539	358	0	358	0.0918655	605.122	47.3292	3725.15	429.462	0.10361	-0.0117442	1	0.961277
231	H11	UNC-AA-1-0013 (SGC-AAK1-1)	1	treatment	A549	190226_IDG_38	72	4026	0.45651	0.334626	0.138227	0.034072	0.0099723	0.0265928	3610	416	0	416	0.103328	605.122	47.3292	3725.15	429.462	0.10361	-0.000281368	1	0.976191
232	K07	UNC-AA-1-0017	1	treatment	A549	190226_IDG_38	72	4203	0.49856	0.304792	0.124902	0.0319455	0.0109976	0.0288034	3819	384	0	384	0.0913633	605.122	47.3292	3725.15	429.462	0.10361	-0.0122464	1	1.01907
233	G14	VE-821	1	treatment	A549	190226_IDG_38	72	4143	0.496322	0.306621	0.133736	0.0281135	0.0105097	0.0246978	3806	337	0	337	0.081342	605.122	47.3292	3725.15	429.462	0.10361	-0.0222677	1	1.01644
234	E18	VE-822	1	treatment	A549	190226_IDG_38	72	4208	0.513219	0.266553	0.115692	0.0138249	0.0647587	0.0249818	4123	85	0	85	0.0201996	605.122	47.3292	3725.15	429.462	0.10361	-0.0834101	1	1.07892
235	H13	Vertex 11e	1	treatment	A549	190226_IDG_38	72	2694	0.633389	0.176594	0.131292	0.0285235	0.00419463	0.0260067	2384	310	0	310	0.115071	605.122	47.3292	3725.15	429.462	0.10361	0.0114608	1	0.686951
236	F22	WZ4003	1	treatment	A549	190226_IDG_38	72	3631	0.459492	0.345828	0.13422	0.028416	0	0.0320435	3308	323	0	323	0.0889562	605.122	47.3292	3725.15	429.462	0.10361	-0.0146535	1	0.91143
237	I16	XMD-17-51	1	treatment	A549	190226_IDG_38	72	774	0.12844	0.00917431	0.475535	0.100917	0	0.285933	654	120	0	120	0.155039	605.122	47.3292	3725.15	429.462	0.10361	0.051429	1	0.0300685
238	F14	XMD8-87	1	treatment	A549	190226_IDG_38	72	4340	0.485867	0.323147	0.121467	0.0328495	0.00560224	0.031067	3927	413	0	413	0.0951613	605.122	47.3292	3725.15	429.462	0.10361	-0.00844844	1	1.04066
239	C20	XMD8-92	1	treatment	A549	190226_IDG_38	72	4517	0.464453	0.340959	0.137023	0.0270603	0.00590406	0.0246002	4065	452	0	452	0.100066	605.122	47.3292	3725.15	429.462	0.10361	-0.00354332	1	1.06772
0	H21	AH5015	1	treatment	COV362	190212_IDG_02	72	2569	0.569976	0.307974	0.0866558	0.0166802	0.000406835	0.0183076	2458	111	0	111	0.0432075	564.879	24.5958	2404.48	113.837	0.0450755	-0.00186807	1	1.02118
0	H21	AH5015	1	treatment	COV362	190212_IDG_03	72	2265	0.535698	0.326578	0.0958084	0.0184247	0.00552741	0.0179641	2171	94	0	94	0.0415011	564.879	24.5958	2404.48	113.837	0.0450755	-0.00357444	2	0.90459
1	H06	BI00007366	1	treatment	COV362	190212_IDG_02	72	2144	0.598554	0.29494	0.0771084	0.0163855	0	0.013012	2075	69	0	69	0.0321828	564.879	24.5958	2404.48	113.837	0.0450755	-0.0128927	1	0.863812
1	H06	BI00007366	1	treatment	COV362	190212_IDG_03	72	1918	0.595289	0.291221	0.0749465	0.0192719	0	0.0192719	1868	50	0	50	0.0260688	564.879	24.5958	2404.48	113.837	0.0450755	-0.0190067	2	0.772398
2	I17	BI00009348	1	treatment	COV362	190212_IDG_02	72	2469	0.539966	0.335034	0.0948129	0.019983	0.00042517	0.00977891	2352	117	0	117	0.0473876	564.879	24.5958	2404.48	113.837	0.0450755	0.00231206	1	0.978991
2	I17	BI00009348	1	treatment	COV362	190212_IDG_03	72	2281	0.556319	0.329212	0.0728022	0.0137363	0	0.0279304	2184	97	0	97	0.0425252	564.879	24.5958	2404.48	113.837	0.0450755	-0.00255034	2	0.910039
3	M18	BI00036838	1	treatment	COV362	190212_IDG_02	72	1257	0.409765	0.299041	0.163906	0.0305144	0	0.0967742	1147	110	0	110	0.0875099	564.879	24.5958	2404.48	113.837	0.0450755	0.0424344	1	0.403464
3	M18	BI00036838	1	treatment	COV362	190212_IDG_03	72	1197	0.388332	0.336372	0.151322	0.0364631	0	0.0875114	1097	100	0	100	0.0835422	564.879	24.5958	2404.48	113.837	0.0450755	0.0384666	2	0.373847
4	K06	BI00047804	1	treatment	COV362	190212_IDG_02	72	2182	0.588975	0.303675	0.0773694	0.0183752	0	0.0116054	2068	114	0	114	0.0522456	564.879	24.5958	2404.48	113.837	0.0450755	0.0071701	1	0.860801
4	K06	BI00047804	1	treatment	COV362	190212_IDG_03	72	2214	0.532455	0.34666	0.0888993	0.019285	0	0.0126999	2126	88	0	88	0.0397471	564.879	24.5958	2404.48	113.837	0.0450755	-0.00532848	2	0.885595
5	G04	BI00113608	1	treatment	COV362	190212_IDG_02	72	1864	0.590073	0.281093	0.0875627	0.0250976	0	0.016174	1793	71	0	71	0.0380901	564.879	24.5958	2404.48	113.837	0.0450755	-0.00698542	1	0.737981
5	G04	BI00113608	1	treatment	COV362	190212_IDG_03	72	1842	0.610922	0.273038	0.0807736	0.0210466	0	0.0142207	1758	84	0	84	0.0456026	564.879	24.5958	2404.48	113.837	0.0450755	0.000527061	2	0.721663
6	E10	BI00133844	1	treatment	COV362	190212_IDG_02	72	2154	0.570305	0.294002	0.0924287	0.0231072	0	0.0201573	2034	120	0	120	0.0557103	564.879	24.5958	2404.48	113.837	0.0450755	0.0106348	1	0.846098
6	E10	BI00133844	1	treatment	COV362	190212_IDG_03	72	2072	0.586294	0.277157	0.0959391	0.0218274	0	0.0187817	1970	102	0	102	0.0492278	564.879	24.5958	2404.48	113.837	0.0450755	0.00415225	2	0.818069
7	H15	BI00601000	1	treatment	COV362	190212_IDG_02	72	2346	0.513525	0.375166	0.0740576	0.016408	0.00709534	0.0137472	2255	91	0	91	0.0387894	564.879	24.5958	2404.48	113.837	0.0450755	-0.00628612	1	0.939505
7	H15	BI00601000	1	treatment	COV362	190212_IDG_03	72	2059	0.526023	0.343608	0.0919656	0.0156645	0.00757959	0.0151592	1979	80	0	80	0.0388538	564.879	24.5958	2404.48	113.837	0.0450755	-0.00622173	2	0.822039
8	C21	BI00604564	1	treatment	COV362	190212_IDG_02	72	2884	0.565455	0.319273	0.0810909	0.0189091	0	0.0152727	2750	134	0	134	0.0464632	564.879	24.5958	2404.48	113.837	0.0450755	0.0013877	1	1.13272
8	C21	BI00604564	1	treatment	COV362	190212_IDG_03	72	2373	0.547757	0.328743	0.0910706	0.0155486	0	0.0168814	2251	122	0	122	0.0514117	564.879	24.5958	2404.48	113.837	0.0450755	0.00633617	2	0.937858
9	L14	BI00614644	1	treatment	COV362	190212_IDG_02	72	2831	0.551838	0.333456	0.0801471	0.0154412	0.000735294	0.0183824	2720	111	0	111	0.0392088	564.879	24.5958	2404.48	113.837	0.0450755	-0.00586678	1	1.12156
9	L14	BI00614644	1	treatment	COV362	190212_IDG_03	72	2350	0.533274	0.342946	0.0869565	0.0133097	0	0.0235138	2254	96	0	96	0.0408511	564.879	24.5958	2404.48	113.837	0.0450755	-0.00422448	2	0.939094
10	G19	BI00645435	1	treatment	COV362	190212_IDG_02	72	2319	0.603645	0.296583	0.0738041	0.0132118	0	0.0127563	2195	124	0	124	0.0534713	564.879	24.5958	2404.48	113.837	0.0450755	0.00839578	1	0.914636
10	G19	BI00645435	1	treatment	COV362	190212_IDG_03	72	2294	0.587403	0.293473	0.0853492	0.0109539	0.00182565	0.020995	2191	103	0	103	0.0448997	564.879	24.5958	2404.48	113.837	0.0450755	-0.000175806	2	0.912966
11	F21	BI00801818	1	treatment	COV362	190212_IDG_02	72	2266	0.54479	0.333638	0.0872943	0.0187386	0	0.0155393	2188	78	0	78	0.0344219	564.879	24.5958	2404.48	113.837	0.0450755	-0.0106537	1	0.911712
11	F21	BI00801818	1	treatment	COV362	190212_IDG_03	72	2442	0.567081	0.325332	0.0745821	0.0205744	0.000857265	0.0115731	2333	109	0	109	0.0446355	564.879	24.5958	2404.48	113.837	0.0450755	-0.00044	2	0.971324
12	K14	BI00865461	1	treatment	COV362	190212_IDG_02	72	2664	0.53168	0.340811	0.0920897	0.0200708	0	0.0153483	2541	123	0	123	0.0461712	564.879	24.5958	2404.48	113.837	0.0450755	0.00109563	1	1.05356
12	K14	BI00865461	1	treatment	COV362	190212_IDG_03	72	2641	0.555291	0.321839	0.0824415	0.019025	0	0.0214031	2523	118	0	118	0.04468	564.879	24.5958	2404.48	113.837	0.0450755	-0.000395499	2	1.04658
13	K21	BI01125081	1	treatment	COV362	190212_IDG_02	72	2577	0.517425	0.348503	0.097581	0.0164002	0	0.0200902	2439	138	0	138	0.0535506	564.879	24.5958	2404.48	113.837	0.0450755	0.0084751	1	1.01369
13	K21	BI01125081	1	treatment	COV362	190212_IDG_03	72	2195	0.52435	0.343262	0.0964539	0.0137116	0.00283688	0.0193853	2115	80	0	80	0.0364465	564.879	24.5958	2404.48	113.837	0.0450755	-0.00862908	2	0.88092
14	K16	BI2536	1	treatment	COV362	190212_IDG_02	72	530	0.132762	0.0877944	0.37045	0.122056	0	0.286938	467	63	0	63	0.118868	564.879	24.5958	2404.48	113.837	0.0450755	0.0737924	1	-0.0870342
14	K16	BI2536	1	treatment	COV362	190212_IDG_03	72	591	0.121857	0.135397	0.357834	0.0502901	0.00773694	0.326886	517	74	0	74	0.125212	564.879	24.5958	2404.48	113.837	0.0450755	0.080136	2	-0.0414977
15	K08	BIBF0846CL	1	treatment	COV362	190212_IDG_02	72	2512	0.570042	0.31308	0.0848101	0.0189873	0	0.0130802	2370	142	0	142	0.0565287	564.879	24.5958	2404.48	113.837	0.0450755	0.0114531	1	0.986224
15	K08	BIBF0846CL	1	treatment	COV362	190212_IDG_03	72	2525	0.562941	0.316992	0.0901537	0.0186955	0	0.0112173	2407	118	0	118	0.0467327	564.879	24.5958	2404.48	113.837	0.0450755	0.00165713	2	1.001
16	E09	BIBW3133BS	1	treatment	COV362	190212_IDG_02	72	2230	0.563526	0.307548	0.0956399	0.0173465	0.00750117	0.00843882	2133	97	0	97	0.0434978	564.879	24.5958	2404.48	113.837	0.0450755	-0.00157779	1	0.888564
16	E09	BIBW3133BS	1	treatment	COV362	190212_IDG_03	72	2284	0.573937	0.329945	0.0707024	0.0124769	0	0.012939	2164	120	0	120	0.0525394	564.879	24.5958	2404.48	113.837	0.0450755	0.00746386	2	0.901649
17	K20	BIRB0876BS	1	treatment	COV362	190212_IDG_02	72	2523	0.536311	0.358097	0.0747078	0.0154424	0	0.0154424	2396	127	0	127	0.0503369	564.879	24.5958	2404.48	113.837	0.0450755	0.00526136	1	0.996621
17	K20	BIRB0876BS	1	treatment	COV362	190212_IDG_03	72	2361	0.534445	0.346204	0.0886354	0.0127249	0.000877578	0.0171128	2279	82	0	82	0.034731	564.879	24.5958	2404.48	113.837	0.0450755	-0.0103445	2	0.949356
18	F11	BIRZ0518XX	1	treatment	COV362	190212_IDG_02	72	2433	0.55088	0.342636	0.0790039	0.0133104	0.00386432	0.0103049	2329	104	0	104	0.0427456	564.879	24.5958	2404.48	113.837	0.0450755	-0.00232996	1	0.969706
18	F11	BIRZ0518XX	1	treatment	COV362	190212_IDG_03	72	2468	0.558248	0.344388	0.0756803	0.0144558	0	0.00722789	2352	116	0	116	0.0470016	564.879	24.5958	2404.48	113.837	0.0450755	0.00192608	2	0.978991
19	F18	BMX-IN-1	1	treatment	COV362	190212_IDG_02	72	2597	0.530556	0.323016	0.113889	0.015873	0.0047619	0.0119048	2520	77	0	77	0.0296496	564.879	24.5958	2404.48	113.837	0.0450755	-0.0154259	1	1.04542
19	F18	BMX-IN-1	1	treatment	COV362	190212_IDG_03	72	2614	0.573205	0.301243	0.0806258	0.0192539	0.00641797	0.0192539	2493	121	0	121	0.0462892	564.879	24.5958	2404.48	113.837	0.0450755	0.00121367	2	1.0349
20	F04	CA93.0	1	treatment	COV362	190212_IDG_02	72	2302	0.518298	0.34721	0.0924062	0.0201281	0.010979	0.010979	2186	116	0	116	0.050391	564.879	24.5958	2404.48	113.837	0.0450755	0.00531542	1	0.910876
20	F04	CA93.0	1	treatment	COV362	190212_IDG_03	72	2291	0.550091	0.330601	0.0901639	0.0150273	0.00455373	0.00956284	2196	95	0	95	0.0414666	564.879	24.5958	2404.48	113.837	0.0450755	-0.00360894	2	0.915054
21	I04	CCT241533	1	treatment	COV362	190212_IDG_02	72	2390	0.555115	0.318342	0.0934744	0.0216049	0	0.0114638	2268	122	0	122	0.051046	564.879	24.5958	2404.48	113.837	0.0450755	0.00597048	1	0.944848
21	I04	CCT241533	1	treatment	COV362	190212_IDG_03	72	2094	0.534578	0.344271	0.0873296	0.0212014	0	0.0126199	1981	113	0	113	0.0539637	564.879	24.5958	2404.48	113.837	0.0450755	0.00888816	2	0.82292
22	D04	CCT244747	1	treatment	COV362	190212_IDG_02	72	2323	0.601959	0.289849	0.0774711	0.0173642	0.00311665	0.0102404	2246	77	0	77	0.0331468	564.879	24.5958	2404.48	113.837	0.0450755	-0.0119288	1	0.935797
22	D04	CCT244747	1	treatment	COV362	190212_IDG_03	72	2437	0.534704	0.343616	0.0805484	0.020994	0.00771208	0.012425	2334	103	0	103	0.0422651	564.879	24.5958	2404.48	113.837	0.0450755	-0.00281046	2	0.971728
23	I18	CCT251545	1	treatment	COV362	190212_IDG_02	72	2055	0.47957	0.352688	0.120968	0.0236559	0	0.0231183	1860	195	0	195	0.0948905	564.879	24.5958	2404.48	113.837	0.0450755	0.049815	1	0.768762
23	I18	CCT251545	1	treatment	COV362	190212_IDG_03	72	1848	0.507898	0.356622	0.0953827	0.0200486	0	0.0200486	1646	202	0	202	0.109307	564.879	24.5958	2404.48	113.837	0.0450755	0.0642318	2	0.668273
24	F03	CCT251921	1	treatment	COV362	190212_IDG_02	72	1684	0.548408	0.331847	0.0872611	0.0203822	0	0.0121019	1570	114	0	114	0.067696	564.879	24.5958	2404.48	113.837	0.0450755	0.0226204	1	0.630958
24	F03	CCT251921	1	treatment	COV362	190212_IDG_03	72	1549	0.517818	0.328727	0.111273	0.0218182	0	0.0203636	1375	174	0	174	0.112331	564.879	24.5958	2404.48	113.837	0.0450755	0.067255	2	0.530667
25	L06	D2202-1	1	treatment	COV362	190212_IDG_02	72	2385	0.54112	0.338145	0.0857393	0.0170604	0.00699913	0.0109361	2286	99	0	99	0.0415094	564.879	24.5958	2404.48	113.837	0.0450755	-0.00356611	1	0.952219
25	L06	D2202-1	1	treatment	COV362	190212_IDG_03	72	2258	0.537639	0.34619	0.0855019	0.0144052	0.000464684	0.0157993	2152	106	0	106	0.0469442	564.879	24.5958	2404.48	113.837	0.0450755	0.00186865	2	0.896595
26	C19	DDR1-IN-1	1	treatment	COV362	190212_IDG_02	72	2740	0.520817	0.351966	0.0975328	0.0165767	0	0.0131072	2594	146	0	146	0.0532847	564.879	24.5958	2404.48	113.837	0.0450755	0.00820913	1	1.07394
26	C19	DDR1-IN-1	1	treatment	COV362	190212_IDG_03	72	2685	0.570817	0.315564	0.0832685	0.0159533	0	0.0143969	2570	115	0	115	0.0428305	564.879	24.5958	2404.48	113.837	0.0450755	-0.002245	2	1.06474
79	C17	ERK5-IN-1	1	treatment	COV362	190212_IDG_02	72	2589	0.575163	0.301062	0.0841503	0.0134804	0.00857843	0.0175654	2448	141	0	141	0.0544612	564.879	24.5958	2404.48	113.837	0.0450755	0.00938564	1	1.01724
79	C17	ERK5-IN-1	1	treatment	COV362	190212_IDG_03	72	2572	0.573625	0.31877	0.0720065	0.0202265	0	0.0153722	2472	100	0	100	0.0388802	564.879	24.5958	2404.48	113.837	0.0450755	-0.0061953	2	1.02668
80	L04	FM-381	1	treatment	COV362	190212_IDG_02	72	2297	0.513004	0.36009	0.0874439	0.0210762	0.00493274	0.0134529	2230	67	0	67	0.0291685	564.879	24.5958	2404.48	113.837	0.0450755	-0.0159071	1	0.929186
80	L04	FM-381	1	treatment	COV362	190212_IDG_03	72	2054	0.565743	0.316877	0.0861461	0.0171285	0	0.0141058	1985	69	0	69	0.033593	564.879	24.5958	2404.48	113.837	0.0450755	-0.0114826	2	0.82468
81	E08	GNF-5	1	treatment	COV362	190212_IDG_02	72	2804	0.558988	0.330108	0.0859695	0.018236	0	0.00669892	2687	117	0	117	0.0417261	564.879	24.5958	2404.48	113.837	0.0450755	-0.00334944	1	1.1092
81	E08	GNF-5	1	treatment	COV362	190212_IDG_03	72	2636	0.565895	0.320687	0.0858626	0.0155751	0	0.0119808	2504	132	0	132	0.0500759	564.879	24.5958	2404.48	113.837	0.0450755	0.00500033	2	1.03919
82	F17	GR269666A	1	treatment	COV362	190212_IDG_02	72	2490	0.544325	0.332229	0.096106	0.0136703	0.00041425	0.013256	2414	76	0	76	0.0305221	564.879	24.5958	2404.48	113.837	0.0450755	-0.0145535	1	1.00379
82	F17	GR269666A	1	treatment	COV362	190212_IDG_03	72	2618	0.553208	0.320048	0.0821044	0.015544	0.0175369	0.0115584	2509	109	0	109	0.0416348	564.879	24.5958	2404.48	113.837	0.0450755	-0.00344071	2	1.04114
83	M21	GSK1070916	1	treatment	COV362	190212_IDG_02	72	905	0.0980392	0.176471	0.117647	0.0686275	0	0.539216	816	89	0	89	0.0983425	564.879	24.5958	2404.48	113.837	0.0450755	0.053267	1	0.192446
83	M21	GSK1070916	1	treatment	COV362	190212_IDG_03	72	852	0.0944149	0.159574	0.125	0.0837766	0	0.537234	752	100	0	100	0.117371	564.879	24.5958	2404.48	113.837	0.0450755	0.0722953	2	0.146737
84	C16	GSK1122999	1	treatment	COV362	190212_IDG_02	72	3007	0.519041	0.356488	0.0916784	0.0165726	0	0.01622	2836	171	0	171	0.0568673	564.879	24.5958	2404.48	113.837	0.0450755	0.0117918	1	1.16438
84	C16	GSK1122999	1	treatment	COV362	190212_IDG_03	72	2933	0.570354	0.311493	0.084855	0.0171858	0	0.0161117	2793	140	0	140	0.0477327	564.879	24.5958	2404.48	113.837	0.0450755	0.00265715	2	1.14861
85	L15	GSK114	1	treatment	COV362	190212_IDG_02	72	2630	0.541994	0.330455	0.0941915	0.016876	0	0.0164835	2548	82	0	82	0.0311787	564.879	24.5958	2404.48	113.837	0.0450755	-0.0138968	1	1.05626
85	L15	GSK114	1	treatment	COV362	190212_IDG_03	72	2531	0.566022	0.325904	0.0853659	0.010513	0.00294365	0.00925147	2378	153	0	153	0.0604504	564.879	24.5958	2404.48	113.837	0.0450755	0.0153749	2	0.989429
86	M10	GSK1379710	1	treatment	COV362	190212_IDG_02	72	2765	0.546845	0.331931	0.0944551	0.0172084	0	0.00956023	2615	150	0	150	0.0542495	564.879	24.5958	2404.48	113.837	0.0450755	0.009174	1	1.08196
86	M10	GSK1379710	1	treatment	COV362	190212_IDG_03	72	2372	0.538935	0.340959	0.0857897	0.016718	0.0114386	0.00615926	2273	99	0	99	0.0417369	564.879	24.5958	2404.48	113.837	0.0450755	-0.00333861	2	0.946898
87	M14	GSK1379712	1	treatment	COV362	190212_IDG_02	72	2784	0.56184	0.322398	0.092006	0.0143288	0.00113122	0.00829563	2652	132	0	132	0.0474138	564.879	24.5958	2404.48	113.837	0.0450755	0.00233825	1	1.09601
87	M14	GSK1379712	1	treatment	COV362	190212_IDG_03	72	2862	0.552825	0.31328	0.0917095	0.0179751	0.0110051	0.0132062	2726	136	0	136	0.0475192	564.879	24.5958	2404.48	113.837	0.0450755	0.00244367	2	1.12379
88	H19	GSK1379761	1	treatment	COV362	190212_IDG_02	72	2390	0.561739	0.30913	0.0947826	0.0152174	0.0073913	0.0117391	2300	90	0	90	0.0376569	564.879	24.5958	2404.48	113.837	0.0450755	-0.00741864	1	0.957931
88	H19	GSK1379761	1	treatment	COV362	190212_IDG_03	72	2463	0.520725	0.352763	0.0988774	0.0129534	0.000863558	0.0138169	2316	147	0	147	0.0596833	564.879	24.5958	2404.48	113.837	0.0450755	0.0146078	2	0.964437
89	H07	GSK1379762	1	treatment	COV362	190212_IDG_02	72	2540	0.552105	0.332652	0.0845934	0.0167552	0.00408664	0.00980793	2447	93	0	93	0.0366142	564.879	24.5958	2404.48	113.837	0.0450755	-0.00846137	1	1.01685
89	H07	GSK1379762	1	treatment	COV362	190212_IDG_03	72	2490	0.544426	0.346186	0.078793	0.0134116	0.00502934	0.0121542	2386	104	0	104	0.0417671	564.879	24.5958	2404.48	113.837	0.0450755	-0.00330848	2	0.992629
90	H22	GSK1392956A	1	treatment	COV362	190212_IDG_02	72	2405	0.57013	0.312987	0.0800866	0.0160173	0.0038961	0.0168831	2310	95	0	95	0.039501	564.879	24.5958	2404.48	113.837	0.0450755	-0.00557451	1	0.962
90	H22	GSK1392956A	1	treatment	COV362	190212_IDG_03	72	2103	0.578156	0.29008	0.0941884	0.0200401	0	0.0175351	1996	107	0	107	0.0508797	564.879	24.5958	2404.48	113.837	0.0450755	0.00580415	2	0.829512
91	H08	GSK1398477	1	treatment	COV362	190212_IDG_02	72	2485	0.575331	0.315408	0.082373	0.0183525	0	0.00853606	2343	142	0	142	0.0571429	564.879	24.5958	2404.48	113.837	0.0450755	0.0120673	1	0.975363
91	H08	GSK1398477	1	treatment	COV362	190212_IDG_03	72	2186	0.575132	0.308209	0.0835334	0.0206433	0.00480077	0.00768123	2083	103	0	103	0.047118	564.879	24.5958	2404.48	113.837	0.0450755	0.00204248	2	0.867248
92	J17	GSK1838705	1	treatment	COV362	190212_IDG_02	72	2200	0.597744	0.283365	0.0841165	0.0197368	0.000469925	0.0145677	2128	72	0	72	0.0327273	564.879	24.5958	2404.48	113.837	0.0450755	-0.0123483	1	0.886444
92	J17	GSK1838705	1	treatment	COV362	190212_IDG_03	72	2119	0.580409	0.297758	0.084308	0.0180312	0.0126706	0.00682261	2052	67	0	67	0.0316187	564.879	24.5958	2404.48	113.837	0.0450755	-0.0134569	2	0.853898
93	L13	GSK1904529	1	treatment	COV362	190212_IDG_02	72	2808	0.544782	0.334937	0.0880829	0.0159141	0.00259067	0.0136936	2702	106	0	106	0.0377493	564.879	24.5958	2404.48	113.837	0.0450755	-0.00732626	1	1.11483
93	L13	GSK1904529	1	treatment	COV362	190212_IDG_03	72	2661	0.553225	0.33518	0.0811239	0.0150376	0.0015829	0.0138504	2527	134	0	134	0.050357	564.879	24.5958	2404.48	113.837	0.0450755	0.00528146	2	1.04814
94	G05	GSK190937	1	treatment	COV362	190212_IDG_02	72	2179	0.556202	0.325581	0.0906008	0.0155039	0.00581395	0.00629845	2064	115	0	115	0.0527765	564.879	24.5958	2404.48	113.837	0.0450755	0.00770096	1	0.859078
94	G05	GSK190937	1	treatment	COV362	190212_IDG_03	72	2270	0.535088	0.347184	0.0803324	0.0161588	0.0110803	0.010157	2166	104	0	104	0.045815	564.879	24.5958	2404.48	113.837	0.0450755	0.000739433	2	0.90249
95	D18	GSK200398A	1	treatment	COV362	190212_IDG_02	72	2170	0.570058	0.294146	0.0897313	0.0182342	0.000479846	0.0273512	2084	86	0	86	0.0396313	564.879	24.5958	2404.48	113.837	0.0450755	-0.00544421	1	0.867677
95	D18	GSK200398A	1	treatment	COV362	190212_IDG_03	72	2081	0.58136	0.306297	0.0740554	0.0156171	0.00100756	0.0216625	1985	96	0	96	0.0461317	564.879	24.5958	2404.48	113.837	0.0450755	0.00105612	2	0.82468
96	F12	GSK204607	1	treatment	COV362	190212_IDG_02	72	2741	0.552901	0.324232	0.0803944	0.0170648	0.0163064	0.00910125	2637	104	0	104	0.0379424	564.879	24.5958	2404.48	113.837	0.0450755	-0.00713319	1	1.09033
96	F12	GSK204607	1	treatment	COV362	190212_IDG_03	72	2832	0.586957	0.300295	0.0751658	0.0206338	0.00773766	0.0092115	2714	118	0	118	0.0416667	564.879	24.5958	2404.48	113.837	0.0450755	-0.00340888	2	1.11931
97	M20	GSK204919	1	treatment	COV362	190212_IDG_02	72	1964	0.510193	0.308476	0.137339	0.0327253	0	0.0112661	1864	100	0	100	0.0509165	564.879	24.5958	2404.48	113.837	0.0450755	0.00584095	1	0.770581
97	M20	GSK204919	1	treatment	COV362	190212_IDG_03	72	1788	0.479907	0.322073	0.137449	0.0430984	0.00698893	0.0104834	1717	71	0	71	0.0397092	564.879	24.5958	2404.48	113.837	0.0450755	-0.00536637	2	0.70233
98	M08	GSK2219385	1	treatment	COV362	190212_IDG_02	72	2629	0.553994	0.340827	0.0830992	0.0136491	0.00080289	0.00762746	2491	138	0	138	0.0524914	564.879	24.5958	2404.48	113.837	0.0450755	0.0074159	1	1.03412
98	M08	GSK2219385	1	treatment	COV362	190212_IDG_03	72	2338	0.600719	0.31205	0.0701439	0.00854317	0.00044964	0.00809353	2224	114	0	114	0.0487596	564.879	24.5958	2404.48	113.837	0.0450755	0.00368408	2	0.9267
99	M11	GSK223675	1	treatment	COV362	190212_IDG_02	72	3319	0.513633	0.374762	0.0859226	0.0139505	0	0.0117311	3154	165	0	165	0.0497138	564.879	24.5958	2404.48	113.837	0.0450755	0.00463822	1	1.2773
99	M11	GSK223675	1	treatment	COV362	190212_IDG_03	72	2816	0.476757	0.391224	0.0948308	0.0119003	0.0133879	0.0119003	2689	127	0	127	0.0450994	564.879	24.5958	2404.48	113.837	0.0450755	2.3887e-05	2	1.10995
100	L08	GSK2250882	1	treatment	COV362	190212_IDG_02	72	2798	0.548123	0.330732	0.0947603	0.0148644	0.000743218	0.0107767	2691	107	0	107	0.0382416	564.879	24.5958	2404.48	113.837	0.0450755	-0.00683394	1	1.1107
100	L08	GSK2250882	1	treatment	COV362	190212_IDG_03	72	2531	0.546093	0.336503	0.0793716	0.0198429	0	0.0181893	2419	112	0	112	0.0442513	564.879	24.5958	2404.48	113.837	0.0450755	-0.000824261	2	1.00577
101	I05	GSK2269557	1	treatment	COV362	190212_IDG_02	72	2452	0.591549	0.298762	0.0806658	0.0192061	0	0.00981647	2343	109	0	109	0.0444535	564.879	24.5958	2404.48	113.837	0.0450755	-0.000622038	1	0.975363
101	I05	GSK2269557	1	treatment	COV362	190212_IDG_03	72	2221	0.571159	0.308671	0.0881244	0.0193214	0	0.0127238	2122	99	0	99	0.0445745	564.879	24.5958	2404.48	113.837	0.0450755	-0.000501029	2	0.883897
102	D14	GSK2283293	1	treatment	COV362	190212_IDG_02	72	2580	0.559157	0.323339	0.0883306	0.012966	0.000405186	0.0158023	2468	112	0	112	0.0434109	564.879	24.5958	2404.48	113.837	0.0450755	-0.00166469	1	1.02511
102	D14	GSK2283293	1	treatment	COV362	190212_IDG_03	72	2982	0.585739	0.30887	0.0730435	0.0191304	0.00313043	0.010087	2875	107	0	107	0.035882	564.879	24.5958	2404.48	113.837	0.0450755	-0.00919359	2	1.17857
103	I10	GSK2288359	1	treatment	COV362	190212_IDG_02	72	2851	0.542804	0.333084	0.0983178	0.0179439	0	0.00785047	2675	176	0	176	0.0617327	564.879	24.5958	2404.48	113.837	0.0450755	0.0166572	1	1.10469
103	I10	GSK2288359	1	treatment	COV362	190212_IDG_03	72	2714	0.533589	0.343186	0.0848369	0.0195777	0.0084453	0.0103647	2605	109	0	109	0.0401621	564.879	24.5958	2404.48	113.837	0.0450755	-0.00491342	2	1.07815
104	I06	GSK2292767	1	treatment	COV362	190212_IDG_02	72	2009	0.585519	0.29276	0.0933893	0.0167891	0	0.0115425	1906	103	0	103	0.0512693	564.879	24.5958	2404.48	113.837	0.0450755	0.00619374	1	0.789561
104	I06	GSK2292767	1	treatment	COV362	190212_IDG_03	72	1653	0.628099	0.273363	0.072473	0.0133503	0	0.0127146	1573	80	0	80	0.0483969	564.879	24.5958	2404.48	113.837	0.0450755	0.00332131	2	0.632449
105	C09	GSK2297428	1	treatment	COV362	190212_IDG_02	72	2550	0.600166	0.29553	0.0782285	0.0136589	0	0.0124172	2416	134	0	134	0.052549	564.879	24.5958	2404.48	113.837	0.0450755	0.00747347	1	1.00458
105	C09	GSK2297428	1	treatment	COV362	190212_IDG_03	72	2320	0.559199	0.331967	0.0851548	0.0145719	0	0.00910747	2196	124	0	124	0.0534483	564.879	24.5958	2404.48	113.837	0.0450755	0.00837273	2	0.915054
106	I09	GSK2298859	1	treatment	COV362	190212_IDG_02	72	2185	0.551675	0.352632	0.0736842	0.0133971	0	0.00861244	2090	95	0	95	0.0434783	564.879	24.5958	2404.48	113.837	0.0450755	-0.00159728	1	0.870248
106	I09	GSK2298859	1	treatment	COV362	190212_IDG_03	72	2097	0.547068	0.346476	0.0803351	0.016757	0	0.00936422	2029	68	0	68	0.0324273	564.879	24.5958	2404.48	113.837	0.0450755	-0.0126483	2	0.843925
107	G09	GSK2328680	1	treatment	COV362	190212_IDG_02	72	2421	0.55938	0.316265	0.0929432	0.0150602	0	0.0163511	2324	97	0	97	0.0400661	564.879	24.5958	2404.48	113.837	0.0450755	-0.00500946	1	0.967681
107	G09	GSK2328680	1	treatment	COV362	190212_IDG_03	72	2214	0.566761	0.313447	0.0833333	0.0227273	0	0.0137311	2112	102	0	102	0.0460705	564.879	24.5958	2404.48	113.837	0.0450755	0.000994916	2	0.879643
108	J21	GSK2334470	1	treatment	COV362	190212_IDG_02	72	1846	0.567991	0.309457	0.0923335	0.0128707	0.00335758	0.0139899	1787	59	0	59	0.031961	564.879	24.5958	2404.48	113.837	0.0450755	-0.0131145	1	0.735195
108	J21	GSK2334470	1	treatment	COV362	190212_IDG_03	72	2014	0.579815	0.30896	0.0803296	0.0144181	0.00102987	0.015448	1942	72	0	72	0.0357498	564.879	24.5958	2404.48	113.837	0.0450755	-0.00932579	2	0.805657
109	C04	GSK2336394	1	treatment	COV362	190212_IDG_02	72	2378	0.597042	0.276109	0.0932317	0.0201703	0.000448229	0.0129987	2231	147	0	147	0.0618167	564.879	24.5958	2404.48	113.837	0.0450755	0.0167411	1	0.9296
109	C04	GSK2336394	1	treatment	COV362	190212_IDG_03	72	2251	0.572829	0.314192	0.0742297	0.0242764	0	0.0144725	2142	109	0	109	0.0484229	564.879	24.5958	2404.48	113.837	0.0450755	0.00334738	2	0.892373
110	C05	GSK2373690	1	treatment	COV362	190212_IDG_02	72	2338	0.578378	0.305856	0.0869369	0.0162162	0	0.0126126	2220	118	0	118	0.0504705	564.879	24.5958	2404.48	113.837	0.0450755	0.00539494	1	0.925041
110	C05	GSK2373690	1	treatment	COV362	190212_IDG_03	72	2055	0.583248	0.300306	0.0832482	0.0178754	0.00102145	0.0143003	1958	97	0	97	0.0472019	564.879	24.5958	2404.48	113.837	0.0450755	0.0021264	2	0.812761
111	G17	GSK2376236	1	treatment	COV362	190212_IDG_02	72	2195	0.563186	0.290892	0.0963281	0.0247973	0.014783	0.0100143	2097	98	0	98	0.0446469	564.879	24.5958	2404.48	113.837	0.0450755	-0.00042862	1	0.873243
111	G17	GSK2376236	1	treatment	COV362	190212_IDG_03	72	2120	0.559113	0.323645	0.0714286	0.020197	0.00985222	0.0157635	2030	90	0	90	0.0424528	564.879	24.5958	2404.48	113.837	0.0450755	-0.00262271	2	0.84436
112	F08	GSK237701A	1	treatment	COV362	190212_IDG_02	72	639	0.143636	0.141818	0.305455	0.0872727	0	0.321818	550	89	0	89	0.13928	564.879	24.5958	2404.48	113.837	0.0450755	0.0942046	1	-0.0126926
112	F08	GSK237701A	1	treatment	COV362	190212_IDG_03	72	539	0.154684	0.102397	0.302832	0.117647	0	0.32244	459	80	0	80	0.148423	564.879	24.5958	2404.48	113.837	0.0450755	0.103347	2	-0.0945521
113	J19	GSK2578215	1	treatment	COV362	190212_IDG_02	72	2636	0.554632	0.32304	0.0934283	0.0162312	0.00514648	0.00752177	2526	110	0	110	0.0417299	564.879	24.5958	2404.48	113.837	0.0450755	-0.00334565	1	1.04775
113	J19	GSK2578215	1	treatment	COV362	190212_IDG_03	72	2516	0.520565	0.356876	0.0914001	0.0149564	0.00083091	0.0153718	2407	109	0	109	0.0433227	564.879	24.5958	2404.48	113.837	0.0450755	-0.00175281	2	1.001
114	L07	GSK2606414	1	treatment	COV362	190212_IDG_02	72	2477	0.561006	0.335849	0.0800839	0.0134172	0.00712788	0.00251572	2385	92	0	92	0.0371417	564.879	24.5958	2404.48	113.837	0.0450755	-0.00793384	1	0.99223
114	L07	GSK2606414	1	treatment	COV362	190212_IDG_03	72	2313	0.563089	0.32106	0.0862146	0.012573	0.00583745	0.0112259	2227	86	0	86	0.0371812	564.879	24.5958	2404.48	113.837	0.0450755	-0.00789439	2	0.927943
115	F07	GSK2656157	1	treatment	COV362	190212_IDG_02	72	2356	0.567376	0.310727	0.0837766	0.0234929	0.000886525	0.0137411	2256	100	0	100	0.0424448	564.879	24.5958	2404.48	113.837	0.0450755	-0.00263072	1	0.939917
115	F07	GSK2656157	1	treatment	COV362	190212_IDG_03	72	2125	0.570582	0.315893	0.0765054	0.0222113	0	0.0148075	2026	99	0	99	0.0465882	564.879	24.5958	2404.48	113.837	0.0450755	0.00151269	2	0.84262
116	C08	GSK270822A	1	treatment	COV362	190212_IDG_02	72	2513	0.548703	0.346661	0.0778392	0.0182901	0	0.00850702	2351	162	0	162	0.0644648	564.879	24.5958	2404.48	113.837	0.0450755	0.0193892	1	0.978588
116	C08	GSK270822A	1	treatment	COV362	190212_IDG_03	72	2356	0.585708	0.310829	0.0828584	0.0127137	0	0.00789128	2281	75	0	75	0.0318336	564.879	24.5958	2404.48	113.837	0.0450755	-0.0132419	2	0.950174
117	G21	GSK2850163	1	treatment	COV362	190212_IDG_02	72	2259	0.558685	0.325352	0.0755869	0.0192488	0	0.0211268	2130	129	0	129	0.0571049	564.879	24.5958	2404.48	113.837	0.0450755	0.0120294	1	0.887292
117	G21	GSK2850163	1	treatment	COV362	190212_IDG_03	72	2305	0.554895	0.31656	0.0814273	0.0237877	0.00960659	0.0137237	2186	119	0	119	0.0516269	564.879	24.5958	2404.48	113.837	0.0450755	0.00655135	2	0.910876
118	G20	GSK299115A	1	treatment	COV362	190212_IDG_02	72	2649	0.587564	0.307753	0.0822511	0.012987	0	0.0094451	2541	108	0	108	0.0407701	564.879	24.5958	2404.48	113.837	0.0450755	-0.00430544	1	1.05356
118	G20	GSK299115A	1	treatment	COV362	190212_IDG_03	72	2713	0.629488	0.276547	0.0699007	0.0141329	0	0.00993125	2618	95	0	95	0.0350166	564.879	24.5958	2404.48	113.837	0.0450755	-0.010059	2	1.0831
119	D11	GSK312879	1	treatment	COV362	190212_IDG_02	72	2839	0.573363	0.302232	0.0984266	0.01427	0.000731797	0.0109769	2733	106	0	106	0.0373371	564.879	24.5958	2404.48	113.837	0.0450755	-0.00773845	1	1.1264
119	D11	GSK312879	1	treatment	COV362	190212_IDG_03	72	2796	0.565476	0.325149	0.0803571	0.0174851	0.00111607	0.0104167	2688	108	0	108	0.0386266	564.879	24.5958	2404.48	113.837	0.0450755	-0.00644894	2	1.10957
120	D12	GSK336313	1	treatment	COV362	190212_IDG_02	72	2820	0.576227	0.30491	0.0856405	0.0136582	0.0118125	0.00775194	2709	111	0	111	0.0393617	564.879	24.5958	2404.48	113.837	0.0450755	-0.00571384	1	1.11745
120	D12	GSK336313	1	treatment	COV362	190212_IDG_03	72	2746	0.565053	0.320726	0.0714826	0.015885	0.0173979	0.00945537	2644	102	0	102	0.0371449	564.879	24.5958	2404.48	113.837	0.0450755	-0.00793061	2	1.09298
121	D17	GSK461364	1	treatment	COV362	190212_IDG_02	72	572	0.120482	0.064257	0.373494	0.0903614	0	0.351406	498	74	0	74	0.129371	564.879	24.5958	2404.48	113.837	0.0450755	0.0842951	1	-0.0585189
121	D17	GSK461364	1	treatment	COV362	190212_IDG_03	72	629	0.122873	0.026465	0.359168	0.111531	0	0.379962	529	100	0	100	0.158983	564.879	24.5958	2404.48	113.837	0.0450755	0.113907	2	-0.0309151
122	L10	GSK481	1	treatment	COV362	190212_IDG_02	72	3013	0.563147	0.307798	0.0931677	0.0200138	0.000690131	0.0151829	2898	115	0	115	0.0381679	564.879	24.5958	2404.48	113.837	0.0450755	-0.00690761	1	1.1869
122	L10	GSK481	1	treatment	COV362	190212_IDG_03	72	2781	0.552312	0.345716	0.0815011	0.0125095	0	0.00796058	2638	143	0	143	0.0514204	564.879	24.5958	2404.48	113.837	0.0450755	0.00634481	2	1.0907
123	I08	GSK579289A	1	treatment	COV362	190212_IDG_02	72	597	0.158397	0.127863	0.282443	0.122137	0	0.30916	524	73	0	73	0.122278	564.879	24.5958	2404.48	113.837	0.0450755	0.0772025	1	-0.0353092
123	I08	GSK579289A	1	treatment	COV362	190212_IDG_03	72	637	0.16696	0.112478	0.295255	0.0527241	0.0579965	0.300527	569	68	0	68	0.10675	564.879	24.5958	2404.48	113.837	0.0450755	0.0616748	2	0.00348433
124	D22	GSK583	1	treatment	COV362	190212_IDG_02	72	2336	0.556491	0.315906	0.0877271	0.0208241	0.000443066	0.0186088	2257	79	0	79	0.0338185	564.879	24.5958	2404.48	113.837	0.0450755	-0.0112571	1	0.940328
124	D22	GSK583	1	treatment	COV362	190212_IDG_03	72	2299	0.542962	0.334095	0.0904936	0.0155393	0.00228519	0.0146252	2188	111	0	111	0.0482819	564.879	24.5958	2404.48	113.837	0.0450755	0.00320632	2	0.911712
125	M15	GSK840	1	treatment	COV362	190212_IDG_02	72	2529	0.567691	0.318106	0.0905316	0.0128738	0.000830565	0.00996678	2408	121	0	121	0.047845	564.879	24.5958	2404.48	113.837	0.0450755	0.00276945	1	1.0014
125	M15	GSK840	1	treatment	COV362	190212_IDG_03	72	2569	0.569281	0.304348	0.0950833	0.0166599	0.00162536	0.0130028	2461	108	0	108	0.0420397	564.879	24.5958	2404.48	113.837	0.0450755	-0.00303584	2	1.02236
126	M16	GSK843	1	treatment	COV362	190212_IDG_02	72	2460	0.576491	0.302506	0.0929127	0.0164218	0.00129646	0.0103717	2314	146	0	146	0.0593496	564.879	24.5958	2404.48	113.837	0.0450755	0.014274	1	0.963625
126	M16	GSK843	1	treatment	COV362	190212_IDG_03	72	2337	0.546433	0.34096	0.0771646	0.017048	0	0.0183939	2229	108	0	108	0.0462131	564.879	24.5958	2404.48	113.837	0.0450755	0.00113755	2	0.928772
127	J18	GSK872	1	treatment	COV362	190212_IDG_02	72	2459	0.568652	0.306717	0.0916772	0.016899	0.000422476	0.0156316	2367	92	0	92	0.0374136	564.879	24.5958	2404.48	113.837	0.0450755	-0.00766196	1	0.98502
127	J18	GSK872	1	treatment	COV362	190212_IDG_03	72	2409	0.552097	0.318201	0.101167	0.0159965	0	0.0125378	2313	96	0	96	0.0398506	564.879	24.5958	2404.48	113.837	0.0450755	-0.00522498	2	0.963219
128	G18	GSK949675	1	treatment	COV362	190212_IDG_02	72	2611	0.557469	0.315579	0.0941129	0.0180216	0	0.0148178	2497	114	0	114	0.0436614	564.879	24.5958	2404.48	113.837	0.0450755	-0.00141411	1	1.03646
128	G18	GSK949675	1	treatment	COV362	190212_IDG_03	72	2416	0.555991	0.308497	0.102397	0.0183007	0.00217865	0.0126362	2295	121	0	121	0.0500828	564.879	24.5958	2404.48	113.837	0.0450755	0.00500724	2	0.955893
129	F06	GW276655	1	treatment	COV362	190212_IDG_02	72	1919	0.516111	0.367778	0.0844444	0.0183333	0.00666667	0.00666667	1800	119	0	119	0.0620115	564.879	24.5958	2404.48	113.837	0.0450755	0.0169359	1	0.741225
129	F06	GW276655	1	treatment	COV362	190212_IDG_03	72	1616	0.486342	0.386409	0.0906063	0.0233178	0	0.0133245	1501	115	0	115	0.0711634	564.879	24.5958	2404.48	113.837	0.0450755	0.0260878	2	0.596255
130	L03	GW280670X	1	treatment	COV362	190212_IDG_02	72	2118	0.56002	0.331845	0.0798611	0.015873	0.00496032	0.00744048	2016	102	0	102	0.0481586	564.879	24.5958	2404.48	113.837	0.0450755	0.0030831	1	0.838262
130	L03	GW280670X	1	treatment	COV362	190212_IDG_03	72	1973	0.517442	0.350423	0.10148	0.0184989	0.00317125	0.0089852	1892	81	0	81	0.0410542	564.879	24.5958	2404.48	113.837	0.0450755	-0.00402131	2	0.783259
131	I07	GW282449A	1	treatment	COV362	190212_IDG_02	72	1977	0.55318	0.32977	0.080171	0.019241	0	0.0176376	1871	106	0	106	0.0536166	564.879	24.5958	2404.48	113.837	0.0450755	0.00854105	1	0.77376
131	I07	GW282449A	1	treatment	COV362	190212_IDG_03	72	1997	0.590216	0.291426	0.0846923	0.0178853	0.000526039	0.0152551	1901	96	0	96	0.0480721	564.879	24.5958	2404.48	113.837	0.0450755	0.00299656	2	0.787313
132	J22	GW282974X	1	treatment	COV362	190212_IDG_02	72	2160	0.567476	0.32233	0.0723301	0.0145631	0.00533981	0.0179612	2060	100	0	100	0.0462963	564.879	24.5958	2404.48	113.837	0.0450755	0.00122075	1	0.857353
132	J22	GW282974X	1	treatment	COV362	190212_IDG_03	72	2105	0.568328	0.306364	0.0833744	0.0197336	0.00197336	0.0202269	2027	78	0	78	0.0370546	564.879	24.5958	2404.48	113.837	0.0450755	-0.00802091	2	0.843055
133	M09	GW296115X	1	treatment	COV362	190212_IDG_02	72	3002	0.597178	0.301587	0.0765432	0.0176367	0	0.00705467	2835	167	0	167	0.0556296	564.879	24.5958	2404.48	113.837	0.0450755	0.010554	1	1.16402
133	M09	GW296115X	1	treatment	COV362	190212_IDG_03	72	2686	0.568698	0.318996	0.0908005	0.0127439	0.00199124	0.00677021	2511	175	0	175	0.0651526	564.879	24.5958	2404.48	113.837	0.0450755	0.0200771	2	1.04192
134	F15	GW300657X	1	treatment	COV362	190212_IDG_02	72	2712	0.561733	0.319402	0.0874233	0.0145706	0.0053681	0.0115031	2608	104	0	104	0.0383481	564.879	24.5958	2404.48	113.837	0.0450755	-0.00672746	1	1.07929
134	F15	GW300657X	1	treatment	COV362	190212_IDG_03	72	2789	0.573244	0.318386	0.0769806	0.0156951	0.00747384	0.00822123	2676	113	0	113	0.0405163	564.879	24.5958	2404.48	113.837	0.0450755	-0.00455923	2	1.10506
135	C15	GW300660X	1	treatment	COV362	190212_IDG_02	72	2818	0.556957	0.315028	0.0920223	0.0170686	0	0.0189239	2695	123	0	123	0.043648	564.879	24.5958	2404.48	113.837	0.0450755	-0.00142757	1	1.1122
135	C15	GW300660X	1	treatment	COV362	190212_IDG_03	72	2784	0.56574	0.312171	0.0897821	0.0157776	0.00187829	0.0146506	2662	122	0	122	0.0438218	564.879	24.5958	2404.48	113.837	0.0450755	-0.00125371	2	1.09979
136	H03	GW305074X (also GW5074)	1	treatment	COV362	190212_IDG_02	72	2136	0.557474	0.315244	0.0952146	0.0162802	0.00542674	0.0103601	2027	109	0	109	0.05103	564.879	24.5958	2404.48	113.837	0.0450755	0.00595442	1	0.843055
136	H03	GW305074X (also GW5074)	1	treatment	COV362	190212_IDG_03	72	2195	0.546451	0.339209	0.0886136	0.0166746	0	0.00905193	2099	96	0	96	0.0437358	564.879	24.5958	2404.48	113.837	0.0450755	-0.00133978	2	0.874098
137	E05	GW335962X	1	treatment	COV362	190212_IDG_02	72	2579	0.567249	0.336449	0.0711093	0.0158472	0	0.00934579	2461	118	0	118	0.0457542	564.879	24.5958	2404.48	113.837	0.0450755	0.000678623	1	1.02236
137	E05	GW335962X	1	treatment	COV362	190212_IDG_03	72	2441	0.535577	0.354495	0.084363	0.0149127	0.00127823	0.00937367	2347	94	0	94	0.0385088	564.879	24.5958	2404.48	113.837	0.0450755	-0.00656674	2	0.976976
138	C12	GW406108X	1	treatment	COV362	190212_IDG_02	72	2782	0.553982	0.343798	0.0765697	0.0153139	0.00229709	0.00803982	2612	170	0	170	0.0611071	564.879	24.5958	2404.48	113.837	0.0450755	0.0160316	1	1.08082
138	C12	GW406108X	1	treatment	COV362	190212_IDG_03	72	2403	0.537037	0.342593	0.0974427	0.0123457	0	0.010582	2268	135	0	135	0.0561798	564.879	24.5958	2404.48	113.837	0.0450755	0.0111042	2	0.944848
139	E17	GW412617	1	treatment	COV362	190212_IDG_02	72	2450	0.55513	0.312899	0.102171	0.0149	0	0.0149	2349	101	0	101	0.0412245	564.879	24.5958	2404.48	113.837	0.0450755	-0.00385106	1	0.977782
139	E17	GW412617	1	treatment	COV362	190212_IDG_03	72	2938	0.555321	0.316825	0.090973	0.0158061	0.00561995	0.0154549	2847	91	0	91	0.0309735	564.879	24.5958	2404.48	113.837	0.0450755	-0.0141021	2	1.16839
140	D06	GW416981X	1	treatment	COV362	190212_IDG_02	72	1955	0.513951	0.345424	0.0859375	0.0245536	0.0195312	0.0106027	1792	163	0	163	0.083376	564.879	24.5958	2404.48	113.837	0.0450755	0.0383004	1	0.737517
140	D06	GW416981X	1	treatment	COV362	190212_IDG_03	72	1791	0.502756	0.347214	0.0955297	0.0220453	0.0134721	0.0189835	1633	158	0	158	0.0882189	564.879	24.5958	2404.48	113.837	0.0450755	0.0431433	2	0.661955
141	G06	GW429374	1	treatment	COV362	190212_IDG_02	72	2501	0.543771	0.338805	0.0888047	0.0189394	0	0.00968013	2376	125	0	125	0.04998	564.879	24.5958	2404.48	113.837	0.0450755	0.00490446	1	0.988628
141	G06	GW429374	1	treatment	COV362	190212_IDG_03	72	2319	0.563644	0.325145	0.0799464	0.0147387	0.0080393	0.00848593	2239	80	0	80	0.0344976	564.879	24.5958	2404.48	113.837	0.0450755	-0.0105779	2	0.932908
142	G07	GW429374A	1	treatment	COV362	190212_IDG_02	72	2408	0.572047	0.324968	0.0770229	0.0134141	0.0064907	0.00605798	2311	97	0	97	0.0402824	564.879	24.5958	2404.48	113.837	0.0450755	-0.00479315	1	0.962406
142	G07	GW429374A	1	treatment	COV362	190212_IDG_03	72	2122	0.603912	0.295355	0.0792176	0.0122249	0.00146699	0.00782396	2045	77	0	77	0.0362865	564.879	24.5958	2404.48	113.837	0.0450755	-0.00878902	2	0.850869
143	K05	GW434756X	1	treatment	COV362	190212_IDG_02	72	2232	0.549812	0.336936	0.0963346	0.0093985	0	0.0075188	2128	104	0	104	0.046595	564.879	24.5958	2404.48	113.837	0.0450755	0.00151944	1	0.886444
143	K05	GW434756X	1	treatment	COV362	190212_IDG_03	72	2239	0.554524	0.339211	0.0812065	0.0153132	0	0.00974478	2155	84	0	84	0.0375167	564.879	24.5958	2404.48	113.837	0.0450755	-0.0075588	2	0.89786
144	M19	GW435821X	1	treatment	COV362	190212_IDG_02	72	2372	0.544978	0.324017	0.0991266	0.0139738	0	0.0179039	2290	82	0	82	0.03457	564.879	24.5958	2404.48	113.837	0.0450755	-0.0105056	1	0.953853
144	M19	GW435821X	1	treatment	COV362	190212_IDG_03	72	2396	0.561419	0.312284	0.0869377	0.0216263	0	0.0177336	2312	84	0	84	0.0350584	564.879	24.5958	2404.48	113.837	0.0450755	-0.0100171	2	0.962813
145	H17	GW440135	1	treatment	COV362	190212_IDG_02	72	2377	0.548499	0.324489	0.0943889	0.0182688	0.000434972	0.0139191	2299	78	0	78	0.0328145	564.879	24.5958	2404.48	113.837	0.0450755	-0.0122611	1	0.957524
145	H17	GW440135	1	treatment	COV362	190212_IDG_03	72	2521	0.565289	0.342612	0.0646746	0.0118707	0.000818666	0.014736	2443	78	0	78	0.0309401	564.879	24.5958	2404.48	113.837	0.0450755	-0.0141354	2	1.01527
146	G08	GW440146	1	treatment	COV362	190212_IDG_02	72	1606	0.578707	0.30307	0.0907903	0.0124102	0.00914435	0.00587851	1531	75	0	75	0.0466999	564.879	24.5958	2404.48	113.837	0.0450755	0.00162433	1	0.611443
146	G08	GW440146	1	treatment	COV362	190212_IDG_03	72	1769	0.555815	0.309176	0.100526	0.019287	0.00526008	0.00993571	1711	58	0	58	0.0327869	564.879	24.5958	2404.48	113.837	0.0450755	-0.0122887	2	0.699481
147	H18	GW442130X	1	treatment	COV362	190212_IDG_02	72	2524	0.571547	0.306512	0.0833679	0.0157611	0.00995438	0.0128577	2411	113	0	113	0.0447702	564.879	24.5958	2404.48	113.837	0.0450755	-0.000305339	1	1.00259
147	H18	GW442130X	1	treatment	COV362	190212_IDG_03	72	2374	0.576517	0.300792	0.0888303	0.0140721	0.00615655	0.0136324	2274	100	0	100	0.042123	564.879	24.5958	2404.48	113.837	0.0450755	-0.00295255	2	0.947308
148	E16	GW513184X	1	treatment	COV362	190212_IDG_02	72	2900	0.578446	0.309018	0.0872434	0.0128299	0	0.0124633	2728	172	0	172	0.0593103	564.879	24.5958	2404.48	113.837	0.0450755	0.0142348	1	1.12454
148	E16	GW513184X	1	treatment	COV362	190212_IDG_03	72	2601	0.579798	0.290101	0.0957576	0.0165657	0	0.0177778	2475	126	0	126	0.0484429	564.879	24.5958	2404.48	113.837	0.0450755	0.00336736	2	1.02786
149	J08	GW525701	1	treatment	COV362	190212_IDG_02	72	679	0.137112	0.177331	0.382084	0.111517	0	0.191956	547	132	0	132	0.194404	564.879	24.5958	2404.48	113.837	0.0450755	0.149328	1	-0.0152733
149	J08	GW525701	1	treatment	COV362	190212_IDG_03	72	617	0.184322	0.17161	0.34322	0.131356	0	0.169492	472	145	0	145	0.235008	564.879	24.5958	2404.48	113.837	0.0450755	0.189933	2	-0.0823696
150	H14	GW560459	1	treatment	COV362	190212_IDG_02	72	2606	0.542063	0.348016	0.0825397	0.0142857	0.0031746	0.00992063	2520	86	0	86	0.0330008	564.879	24.5958	2404.48	113.837	0.0450755	-0.0120748	1	1.04542
150	H14	GW560459	1	treatment	COV362	190212_IDG_03	72	2583	0.578526	0.312901	0.0793269	0.0148237	0.00440705	0.010016	2496	87	0	87	0.0336818	564.879	24.5958	2404.48	113.837	0.0450755	-0.0113938	2	1.03607
151	E15	GW569293E	1	treatment	COV362	190212_IDG_02	72	2745	0.50495	0.384235	0.0826352	0.0129474	0	0.0152323	2626	119	0	119	0.0433515	564.879	24.5958	2404.48	113.837	0.0450755	-0.001724	1	1.08615
151	E15	GW569293E	1	treatment	COV362	190212_IDG_03	72	2595	0.551061	0.348819	0.0744894	0.0136163	0	0.0120144	2497	98	0	98	0.0377649	564.879	24.5958	2404.48	113.837	0.0450755	-0.00731061	2	1.03646
152	D10	GW572399X	1	treatment	COV362	190212_IDG_02	72	2251	0.52809	0.339419	0.0964419	0.0187266	0.00561798	0.0117041	2136	115	0	115	0.0510884	564.879	24.5958	2404.48	113.837	0.0450755	0.00601286	1	0.889834
152	D10	GW572399X	1	treatment	COV362	190212_IDG_03	72	2278	0.529548	0.354571	0.0863343	0.0184672	0.00415512	0.00692521	2166	112	0	112	0.0491659	564.879	24.5958	2404.48	113.837	0.0450755	0.00409039	2	0.90249
153	L22	GW576924A	1	treatment	COV362	190212_IDG_02	72	2339	0.561483	0.308318	0.0940325	0.0167269	0.0108499	0.00858951	2212	127	0	127	0.0542967	564.879	24.5958	2404.48	113.837	0.0450755	0.00922116	1	0.921718
153	L22	GW576924A	1	treatment	COV362	190212_IDG_03	72	2236	0.568637	0.298744	0.0898092	0.0214053	0.000930665	0.0204746	2149	87	0	87	0.0389088	564.879	24.5958	2404.48	113.837	0.0450755	-0.00616678	2	0.895329
154	N13	GW578748X	1	treatment	COV362	190212_IDG_02	72	2589	0.552951	0.329426	0.0869038	0.0121261	0.00121261	0.0173808	2474	115	0	115	0.0444187	564.879	24.5958	2404.48	113.837	0.0450755	-0.00065685	1	1.02747
154	N13	GW578748X	1	treatment	COV362	190212_IDG_03	72	2382	0.558482	0.333482	0.0825893	0.009375	0	0.0160714	2240	142	0	142	0.0596138	564.879	24.5958	2404.48	113.837	0.0450755	0.0145382	2	0.933321
155	J07	GW580509X	1	treatment	COV362	190212_IDG_02	72	2499	0.568439	0.31938	0.0816241	0.0192549	0	0.0113018	2389	110	0	110	0.0440176	564.879	24.5958	2404.48	113.837	0.0450755	-0.00105794	1	0.993828
155	J07	GW580509X	1	treatment	COV362	190212_IDG_03	72	2267	0.531507	0.346575	0.0899543	0.0164384	0	0.0155251	2190	77	0	77	0.0339656	564.879	24.5958	2404.48	113.837	0.0450755	-0.01111	2	0.912548
156	G16	GW621970X	1	treatment	COV362	190212_IDG_02	72	2569	0.540197	0.334701	0.0894176	0.014356	0	0.021329	2438	131	0	131	0.0509926	564.879	24.5958	2404.48	113.837	0.0450755	0.00591706	1	1.01329
156	G16	GW621970X	1	treatment	COV362	190212_IDG_03	72	2389	0.562363	0.337418	0.0682713	0.0175055	0.000875274	0.0135667	2285	104	0	104	0.0435329	564.879	24.5958	2404.48	113.837	0.0450755	-0.00154269	2	0.95181
157	K15	GW632580X	1	treatment	COV362	190212_IDG_02	72	2619	0.559743	0.315156	0.0842021	0.021251	0.00160385	0.0180433	2494	125	0	125	0.0477281	564.879	24.5958	2404.48	113.837	0.0450755	0.0026526	1	1.03529
157	K15	GW632580X	1	treatment	COV362	190212_IDG_03	72	2644	0.556623	0.334934	0.0756303	0.012405	0.00240096	0.0180072	2499	145	0	145	0.0548411	564.879	24.5958	2404.48	113.837	0.0450755	0.0097656	2	1.03724
158	M05	GW642138X	1	treatment	COV362	190212_IDG_02	72	2526	0.532622	0.332786	0.0980714	0.0172343	0.0123102	0.00697579	2437	89	0	89	0.0352336	564.879	24.5958	2404.48	113.837	0.0450755	-0.00984197	1	1.0129
158	M05	GW642138X	1	treatment	COV362	190212_IDG_03	72	2624	0.567429	0.336751	0.0761041	0.0126183	0	0.00709779	2536	88	0	88	0.0335366	564.879	24.5958	2404.48	113.837	0.0450755	-0.011539	2	1.05162
159	K17	GW651576X	1	treatment	COV362	190212_IDG_02	72	2457	0.545455	0.315208	0.115548	0.0135939	0	0.0101954	2354	103	0	103	0.041921	564.879	24.5958	2404.48	113.837	0.0450755	-0.0031545	1	0.979796
159	K17	GW651576X	1	treatment	COV362	190212_IDG_03	72	2533	0.554468	0.321093	0.0889433	0.0179519	0.00938392	0.00815993	2451	82	0	82	0.0323727	564.879	24.5958	2404.48	113.837	0.0450755	-0.0127029	2	1.01842
160	M06	GW683134A	1	treatment	COV362	190212_IDG_02	72	2300	0.517774	0.348924	0.101029	0.0196445	0	0.0126286	2138	162	0	162	0.0704348	564.879	24.5958	2404.48	113.837	0.0450755	0.0253592	1	0.890681
160	M06	GW683134A	1	treatment	COV362	190212_IDG_03	72	2124	0.515733	0.354474	0.0983284	0.0172075	0	0.0142576	2034	90	0	90	0.0423729	564.879	24.5958	2404.48	113.837	0.0450755	-0.00270266	2	0.846098
161	M04	GW684088	1	treatment	COV362	190212_IDG_02	72	2624	0.54921	0.351559	0.0765492	0.0141758	0.00162009	0.00688538	2469	155	0	155	0.0590701	564.879	24.5958	2404.48	113.837	0.0450755	0.0139946	1	1.0255
161	M04	GW684088	1	treatment	COV362	190212_IDG_03	72	2566	0.545786	0.333063	0.0964344	0.0149919	0.000810373	0.0089141	2468	98	0	98	0.0381917	564.879	24.5958	2404.48	113.837	0.0450755	-0.00688381	2	1.02511
162	N09	GW693917A	1	treatment	COV362	190212_IDG_02	72	2579	0.528155	0.34402	0.0957665	0.0164406	0	0.0156186	2433	146	0	146	0.0566111	564.879	24.5958	2404.48	113.837	0.0450755	0.0115355	1	1.01132
162	N09	GW693917A	1	treatment	COV362	190212_IDG_03	72	2515	0.508846	0.351727	0.110783	0.0172704	0	0.0113732	2374	141	0	141	0.0560636	564.879	24.5958	2404.48	113.837	0.0450755	0.0109881	2	0.987827
163	N04	GW709042A	1	treatment	COV362	190212_IDG_02	72	2175	0.50938	0.380471	0.0865801	0.012506	0	0.011063	2079	96	0	96	0.0441379	564.879	24.5958	2404.48	113.837	0.0450755	-0.000937614	1	0.865531
163	N04	GW709042A	1	treatment	COV362	190212_IDG_03	72	2324	0.467972	0.399911	0.108096	0.0133452	0.00088968	0.00978648	2248	76	0	76	0.0327022	564.879	24.5958	2404.48	113.837	0.0450755	-0.0123733	2	0.936622
164	N12	GW770249X	1	treatment	COV362	190212_IDG_02	72	2288	0.520833	0.345833	0.099537	0.0180556	0	0.0157407	2160	128	0	128	0.0559441	564.879	24.5958	2404.48	113.837	0.0450755	0.0108685	1	0.899966
164	N12	GW770249X	1	treatment	COV362	190212_IDG_03	72	2358	0.508585	0.360093	0.099768	0.0134571	0	0.0180974	2155	203	0	203	0.0860899	564.879	24.5958	2404.48	113.837	0.0450755	0.0410144	2	0.89786
165	J06	GW780159X	1	treatment	COV362	190212_IDG_02	72	2836	0.526181	0.350787	0.0882461	0.019773	0	0.0150128	2731	105	0	105	0.037024	564.879	24.5958	2404.48	113.837	0.0450755	-0.00805157	1	1.12566
165	J06	GW780159X	1	treatment	COV362	190212_IDG_03	72	2907	0.515	0.363571	0.0917857	0.0125	0.00714286	0.01	2800	107	0	107	0.0368077	564.879	24.5958	2404.48	113.837	0.0450755	-0.00826784	2	1.15119
166	J04	GW784752X	1	treatment	COV362	190212_IDG_02	72	2432	0.510038	0.37249	0.0824434	0.0175139	0.00598035	0.0115335	2341	91	0	91	0.0374178	564.879	24.5958	2404.48	113.837	0.0450755	-0.00765778	1	0.974556
166	J04	GW784752X	1	treatment	COV362	190212_IDG_03	72	2384	0.519147	0.362924	0.0900783	0.0147955	0	0.0130548	2298	86	0	86	0.0360738	564.879	24.5958	2404.48	113.837	0.0450755	-0.00900172	2	0.957116
167	L21	GW792479	1	treatment	COV362	190212_IDG_02	72	2552	0.524435	0.356057	0.0854209	0.0119097	0.00698152	0.0151951	2435	117	0	117	0.0458464	564.879	24.5958	2404.48	113.837	0.0450755	0.00077085	1	1.01211
167	L21	GW792479	1	treatment	COV362	190212_IDG_03	72	2367	0.541831	0.321507	0.0924223	0.0157687	0.0105125	0.0179588	2283	84	0	84	0.035488	564.879	24.5958	2404.48	113.837	0.0450755	-0.00958759	2	0.950992
168	N10	GW807982X	1	treatment	COV362	190212_IDG_02	72	2707	0.54426	0.343641	0.0831078	0.0146888	0.00115964	0.0131426	2587	120	0	120	0.0443295	564.879	24.5958	2404.48	113.837	0.0450755	-0.000746029	1	1.07126
168	N10	GW807982X	1	treatment	COV362	190212_IDG_03	72	2559	0.545729	0.321398	0.0962036	0.0176877	0	0.0189819	2318	241	0	241	0.0941774	564.879	24.5958	2404.48	113.837	0.0450755	0.0491019	2	0.965249
169	D08	GW810372X	1	treatment	COV362	190212_IDG_02	72	2560	0.547009	0.322344	0.0911681	0.015466	0.013431	0.010582	2457	103	0	103	0.0402344	564.879	24.5958	2404.48	113.837	0.0450755	-0.00484117	1	1.02079
169	D08	GW810372X	1	treatment	COV362	190212_IDG_03	72	2359	0.566004	0.305519	0.0909492	0.0198675	0	0.01766	2265	94	0	94	0.0398474	564.879	24.5958	2404.48	113.837	0.0450755	-0.00522815	2	0.943616
170	I15	GW811761X	1	treatment	COV362	190212_IDG_02	72	2482	0.541226	0.319239	0.102326	0.0164905	0.00803383	0.012685	2365	117	0	117	0.0471394	564.879	24.5958	2404.48	113.837	0.0450755	0.00206386	1	0.984217
170	I15	GW811761X	1	treatment	COV362	190212_IDG_03	72	2556	0.577265	0.315939	0.0720065	0.0145631	0.00444984	0.0157767	2472	84	0	84	0.0328638	564.879	24.5958	2404.48	113.837	0.0450755	-0.0122117	2	1.02668
171	K04	GW814408X	1	treatment	COV362	190212_IDG_02	72	2062	0.51942	0.358364	0.0947695	0.0186432	0	0.00880373	1931	131	0	131	0.0635306	564.879	24.5958	2404.48	113.837	0.0450755	0.018455	1	0.800756
171	K04	GW814408X	1	treatment	COV362	190212_IDG_03	72	1921	0.483657	0.362327	0.111357	0.0199446	0	0.0227147	1805	116	0	116	0.0603852	564.879	24.5958	2404.48	113.837	0.0450755	0.0153097	2	0.743537
172	K09	GW830263A	1	treatment	COV362	190212_IDG_02	72	2777	0.581473	0.305432	0.0837054	0.015997	0	0.0133929	2688	89	0	89	0.032049	564.879	24.5958	2404.48	113.837	0.0450755	-0.0130266	1	1.10957
172	K09	GW830263A	1	treatment	COV362	190212_IDG_03	72	2508	0.544251	0.35153	0.0835401	0.0115798	0	0.00909843	2418	90	0	90	0.0358852	564.879	24.5958	2404.48	113.837	0.0450755	-0.00919038	2	1.00537
173	N16	GW830900A	1	treatment	COV362	190212_IDG_02	72	2660	0.586777	0.308146	0.0787092	0.0133806	0	0.012987	2541	119	0	119	0.0447368	564.879	24.5958	2404.48	113.837	0.0450755	-0.000338703	1	1.05356
173	N16	GW830900A	1	treatment	COV362	190212_IDG_03	72	2753	0.547429	0.332952	0.087619	0.0137143	0	0.0182857	2625	128	0	128	0.0464947	564.879	24.5958	2404.48	113.837	0.0450755	0.00141919	2	1.08577
174	N21	GW832467	1	treatment	COV362	190212_IDG_02	72	2473	0.556536	0.315259	0.0916351	0.0222783	0.000840689	0.013451	2379	94	0	94	0.0380105	564.879	24.5958	2404.48	113.837	0.0450755	-0.00706503	1	0.98983
174	N21	GW832467	1	treatment	COV362	190212_IDG_03	72	2267	0.526459	0.336047	0.0936228	0.0180914	0.0113071	0.0144731	2211	56	0	56	0.0247022	564.879	24.5958	2404.48	113.837	0.0450755	-0.0203733	2	0.921302
175	E14	GW855857	1	treatment	COV362	190212_IDG_02	72	2580	0.493797	0.350289	0.105045	0.0314309	0.0119934	0.00744417	2418	162	0	162	0.0627907	564.879	24.5958	2404.48	113.837	0.0450755	0.0177152	1	1.00537
175	E14	GW855857	1	treatment	COV362	190212_IDG_03	72	2541	0.486364	0.356612	0.113223	0.0256198	0.00991736	0.00826446	2420	121	0	121	0.047619	564.879	24.5958	2404.48	113.837	0.0450755	0.0025435	2	1.00617
176	D03	GW867253	1	treatment	COV362	190212_IDG_02	72	2370	0.557218	0.322623	0.0862676	0.0215669	0.00484155	0.00748239	2272	98	0	98	0.0413502	564.879	24.5958	2404.48	113.837	0.0450755	-0.00372533	1	0.946488
176	D03	GW867253	1	treatment	COV362	190212_IDG_03	72	2091	0.559661	0.323015	0.0843734	0.017973	0	0.0149775	2003	88	0	88	0.0420851	564.879	24.5958	2404.48	113.837	0.0450755	-0.00299042	2	0.83258
177	D07	GW868318	1	treatment	COV362	190212_IDG_02	72	2396	0.534904	0.338569	0.0929319	0.0209424	0	0.0126527	2292	104	0	104	0.0434057	564.879	24.5958	2404.48	113.837	0.0450755	-0.00166987	1	0.954669
177	D07	GW868318	1	treatment	COV362	190212_IDG_03	72	2543	0.583128	0.310288	0.0711934	0.0152263	0.0139918	0.00617284	2430	113	0	113	0.0444357	564.879	24.5958	2404.48	113.837	0.0450755	-0.000639839	2	1.01013
178	E11	HG-10-102-01	1	treatment	COV362	190212_IDG_02	72	2419	0.552632	0.319737	0.0921053	0.0219298	0	0.0135965	2280	139	0	139	0.0574618	564.879	24.5958	2404.48	113.837	0.0450755	0.0123862	1	0.949765
178	E11	HG-10-102-01	1	treatment	COV362	190212_IDG_03	72	2645	0.556173	0.327908	0.0829694	0.0162763	0.00793966	0.00873362	2519	126	0	126	0.0476371	564.879	24.5958	2404.48	113.837	0.0450755	0.00256151	2	1.04503
179	G11	HTH-01-015	1	treatment	COV362	190212_IDG_02	72	2414	0.523176	0.35279	0.095279	0.0133047	0.000429185	0.0150215	2330	84	0	84	0.034797	564.879	24.5958	2404.48	113.837	0.0450755	-0.0102785	1	0.970111
179	G11	HTH-01-015	1	treatment	COV362	190212_IDG_03	72	2560	0.547901	0.346514	0.0778638	0.0154912	0.000407664	0.0118223	2453	107	0	107	0.0417969	564.879	24.5958	2404.48	113.837	0.0450755	-0.00327867	2	1.01921
180	H10	JH-II-127	1	treatment	COV362	190212_IDG_02	72	2320	0.515041	0.34093	0.0783956	0.0259799	0.0273473	0.0123063	2194	126	0	126	0.0543103	564.879	24.5958	2404.48	113.837	0.0450755	0.0092348	1	0.914219
180	H10	JH-II-127	1	treatment	COV362	190212_IDG_03	72	2217	0.558575	0.33552	0.0712277	0.0220244	0.00515464	0.00749766	2134	83	0	83	0.037438	564.879	24.5958	2404.48	113.837	0.0450755	-0.00763757	2	0.888987
181	C10	JNK-IN-7	1	treatment	COV362	190212_IDG_02	72	2594	0.561139	0.204774	0.173786	0.0464824	0	0.0138191	2388	206	0	206	0.079414	564.879	24.5958	2404.48	113.837	0.0450755	0.0343385	1	0.993428
181	C10	JNK-IN-7	1	treatment	COV362	190212_IDG_03	72	2389	0.596251	0.169639	0.164609	0.0548697	0	0.0146319	2187	202	0	202	0.0845542	564.879	24.5958	2404.48	113.837	0.0450755	0.0394787	2	0.911294
182	L11	K05908	1	treatment	COV362	190212_IDG_02	72	2470	0.509672	0.341884	0.109756	0.0185029	0.00420521	0.0159798	2378	92	0	92	0.037247	564.879	24.5958	2404.48	113.837	0.0450755	-0.00782858	1	0.989429
182	L11	K05908	1	treatment	COV362	190212_IDG_03	72	2552	0.546824	0.327769	0.088355	0.0134365	0.000814332	0.0228013	2456	96	0	96	0.0376176	564.879	24.5958	2404.48	113.837	0.0450755	-0.00745799	2	1.02039
183	D19	NVP-2	1	treatment	COV362	190212_IDG_02	72	2784	0.549774	0.346531	0.0784314	0.0116893	0.000377074	0.0131976	2652	132	0	132	0.0474138	564.879	24.5958	2404.48	113.837	0.0450755	0.00233825	1	1.09601
183	D19	NVP-2	1	treatment	COV362	190212_IDG_03	72	2731	0.558937	0.344376	0.0674114	0.0150231	0.00154083	0.0127119	2596	135	0	135	0.0494324	564.879	24.5958	2404.48	113.837	0.0450755	0.0043569	2	1.07471
184	G10	NVS-PAK1-1	1	treatment	COV362	190212_IDG_02	72	2440	0.580948	0.324648	0.0743272	0.0119607	0.000427168	0.00768902	2341	99	0	99	0.0405738	564.879	24.5958	2404.48	113.837	0.0450755	-0.00450177	1	0.974556
184	G10	NVS-PAK1-1	1	treatment	COV362	190212_IDG_03	72	2579	0.564216	0.324313	0.0852181	0.0169628	0	0.00928918	2476	103	0	103	0.039938	564.879	24.5958	2404.48	113.837	0.0450755	-0.00513758	2	1.02825
185	C06	PFE-PKIS 1	1	treatment	COV362	190212_IDG_02	72	2491	0.561574	0.334321	0.0770207	0.0160813	0	0.011003	2363	128	0	128	0.051385	564.879	24.5958	2404.48	113.837	0.0450755	0.00630944	1	0.983414
185	C06	PFE-PKIS 1	1	treatment	COV362	190212_IDG_03	72	2107	0.514597	0.36764	0.08857	0.0183078	0.000989609	0.00989609	2021	86	0	86	0.0408163	564.879	24.5958	2404.48	113.837	0.0450755	-0.00425922	2	0.840442
186	E06	PFE-PKIS 12	1	treatment	COV362	190212_IDG_02	72	2582	0.573571	0.322254	0.0758006	0.0194568	0	0.00891771	2467	115	0	115	0.0445391	564.879	24.5958	2404.48	113.837	0.0450755	-0.000536428	1	1.02472
186	E06	PFE-PKIS 12	1	treatment	COV362	190212_IDG_03	72	2239	0.548086	0.342204	0.0863679	0.0135387	0	0.00980392	2142	97	0	97	0.0433229	564.879	24.5958	2404.48	113.837	0.0450755	-0.00175263	2	0.892373
187	E07	PFE-PKIS 21 (PD 0325901)	1	treatment	COV362	190212_IDG_02	72	1503	0.744444	0.147222	0.0701389	0.0180556	0.00833333	0.0118056	1440	63	0	63	0.0419162	564.879	24.5958	2404.48	113.837	0.0450755	-0.00315938	1	0.564876
187	E07	PFE-PKIS 21 (PD 0325901)	1	treatment	COV362	190212_IDG_03	72	1283	0.775345	0.145174	0.053528	0.0129765	0	0.0129765	1233	50	0	50	0.0389712	564.879	24.5958	2404.48	113.837	0.0450755	-0.00610438	2	0.452871
188	I11	PFE-PKIS 25	1	treatment	COV362	190212_IDG_02	72	2563	0.561036	0.321414	0.0916564	0.0152076	0	0.0106864	2433	130	0	130	0.0507218	564.879	24.5958	2404.48	113.837	0.0450755	0.00564627	1	1.01132
188	I11	PFE-PKIS 25	1	treatment	COV362	190212_IDG_03	72	2686	0.574377	0.320483	0.0786604	0.0167445	0	0.0097352	2568	118	0	118	0.0439315	564.879	24.5958	2404.48	113.837	0.0450755	-0.00114405	2	1.06397
189	N20	PFE-PKIS 29	1	treatment	COV362	190212_IDG_02	72	963	0.72306	0.162716	0.0678879	0.0237069	0	0.0226293	928	35	0	35	0.0363448	564.879	24.5958	2404.48	113.837	0.0450755	-0.00873079	1	0.268144
189	N20	PFE-PKIS 29	1	treatment	COV362	190212_IDG_03	72	1089	0.751697	0.14452	0.0746848	0.0184287	0	0.0106693	1031	58	0	58	0.0532599	564.879	24.5958	2404.48	113.837	0.0450755	0.00818433	2	0.333653
190	M17	PFE-PKIS 3	1	treatment	COV362	190212_IDG_02	72	2723	0.540129	0.338151	0.0939521	0.0178775	0.000380373	0.00950932	2629	94	0	94	0.0345207	564.879	24.5958	2404.48	113.837	0.0450755	-0.0105548	1	1.08729
190	M17	PFE-PKIS 3	1	treatment	COV362	190212_IDG_03	72	2414	0.527838	0.349158	0.083729	0.0228744	0.000431593	0.0159689	2317	97	0	97	0.0401823	564.879	24.5958	2404.48	113.837	0.0450755	-0.00489327	2	0.964843
191	L12	PFE-PKIS 32	1	treatment	COV362	190212_IDG_02	72	2663	0.532139	0.356837	0.0821971	0.0151928	0.00038956	0.013245	2567	96	0	96	0.0360496	564.879	24.5958	2404.48	113.837	0.0450755	-0.00902598	1	1.06359
191	L12	PFE-PKIS 32	1	treatment	COV362	190212_IDG_03	72	2702	0.549732	0.334736	0.0864575	0.0122418	0.00650344	0.010329	2614	88	0	88	0.0325685	564.879	24.5958	2404.48	113.837	0.0450755	-0.0125071	2	1.08158
192	I14	PFE-PKIS 34	1	treatment	COV362	190212_IDG_02	72	2678	0.528294	0.327266	0.109616	0.0197863	0.00118718	0.0138504	2527	151	0	151	0.0563854	564.879	24.5958	2404.48	113.837	0.0450755	0.0113098	1	1.04814
192	I14	PFE-PKIS 34	1	treatment	COV362	190212_IDG_03	72	2496	0.548979	0.340142	0.0867028	0.0150063	0.00041684	0.00875365	2399	97	0	97	0.0388622	564.879	24.5958	2404.48	113.837	0.0450755	-0.00621337	2	0.997817
193	C13	PFE-PKIS 39	1	treatment	COV362	190212_IDG_02	72	2648	0.56399	0.329491	0.0822734	0.0155008	0	0.00874404	2516	132	0	132	0.0498489	564.879	24.5958	2404.48	113.837	0.0450755	0.0047734	1	1.04386
193	C13	PFE-PKIS 39	1	treatment	COV362	190212_IDG_03	72	2528	0.542465	0.337219	0.0899251	0.0183181	0	0.0120733	2402	126	0	126	0.0498418	564.879	24.5958	2404.48	113.837	0.0450755	0.00476623	2	0.999012
194	E04	PFE-PKIS 40	1	treatment	COV362	190212_IDG_02	72	1103	0.68599	0.197101	0.0714976	0.0222222	0	0.0231884	1035	68	0	68	0.06165	564.879	24.5958	2404.48	113.837	0.0450755	0.0165745	1	0.336126
194	E04	PFE-PKIS 40	1	treatment	COV362	190212_IDG_03	72	896	0.684149	0.216783	0.0745921	0.0104895	0.0011655	0.0128205	858	38	0	38	0.0424107	564.879	24.5958	2404.48	113.837	0.0450755	-0.00266483	2	0.221432
195	H12	PFE-PKIS 41	1	treatment	COV362	190212_IDG_02	72	2124	0.489936	0.377025	0.0864016	0.017673	0.0201276	0.00883652	2037	87	0	87	0.0409605	564.879	24.5958	2404.48	113.837	0.0450755	-0.00411509	1	0.8474
195	H12	PFE-PKIS 41	1	treatment	COV362	190212_IDG_03	72	2229	0.54763	0.343031	0.0839981	0.00844674	0.00563116	0.0112623	2131	98	0	98	0.0439659	564.879	24.5958	2404.48	113.837	0.0450755	-0.00110964	2	0.887716
196	F13	PFE-PKIS 44	1	treatment	COV362	190212_IDG_02	72	2536	0.541391	0.330298	0.0931291	0.0169702	0.00745033	0.0107616	2416	120	0	120	0.0473186	564.879	24.5958	2404.48	113.837	0.0450755	0.00224307	1	1.00458
196	F13	PFE-PKIS 44	1	treatment	COV362	190212_IDG_03	72	2650	0.543127	0.333596	0.0756203	0.0169358	0.0212682	0.00945254	2539	111	0	111	0.0418868	564.879	24.5958	2404.48	113.837	0.0450755	-0.00318875	2	1.05278
197	F19	SB-216385	1	treatment	COV362	190212_IDG_02	72	2384	0.557212	0.32135	0.0881192	0.0140289	0.000438404	0.0188514	2281	103	0	103	0.0432047	564.879	24.5958	2404.48	113.837	0.0450755	-0.00187085	1	0.950174
197	F19	SB-216385	1	treatment	COV362	190212_IDG_03	72	2504	0.547311	0.323885	0.0954564	0.0158399	0.00166736	0.0158399	2399	105	0	105	0.0419329	564.879	24.5958	2404.48	113.837	0.0450755	-0.00314264	2	0.997817
198	G15	SB-219980	1	treatment	COV362	190212_IDG_02	72	2426	0.537037	0.334195	0.101637	0.0167959	0.000861326	0.00947459	2322	104	0	104	0.0428689	564.879	24.5958	2404.48	113.837	0.0450755	-0.00220662	1	0.966871
198	G15	SB-219980	1	treatment	COV362	190212_IDG_03	72	2180	0.52832	0.351737	0.0913851	0.013327	0.00666349	0.00856735	2101	79	0	79	0.0362385	564.879	24.5958	2404.48	113.837	0.0450755	-0.00883701	2	0.874952
199	N06	SB-242719	1	treatment	COV362	190212_IDG_02	72	2181	0.517192	0.36724	0.0830946	0.0138491	0.0105062	0.00811843	2094	87	0	87	0.03989	564.879	24.5958	2404.48	113.837	0.0450755	-0.00518559	1	0.87196
199	N06	SB-242719	1	treatment	COV362	190212_IDG_03	72	2235	0.525974	0.3641	0.0848794	0.0157699	0.00139147	0.00788497	2156	79	0	79	0.0353468	564.879	24.5958	2404.48	113.837	0.0450755	-0.00972879	2	0.898281
200	J10	SB-282975	1	treatment	COV362	190212_IDG_02	72	2603	0.546619	0.333733	0.090036	0.0160064	0.00560224	0.0080032	2499	104	0	104	0.0399539	564.879	24.5958	2404.48	113.837	0.0450755	-0.00512165	1	1.03724
200	J10	SB-282975	1	treatment	COV362	190212_IDG_03	72	2352	0.575252	0.320755	0.0741553	0.0153576	0	0.01448	2279	73	0	73	0.0310374	564.879	24.5958	2404.48	113.837	0.0450755	-0.0140381	2	0.949356
201	L17	SB-517081	1	treatment	COV362	190212_IDG_02	72	2733	0.550719	0.336488	0.0832702	0.0162755	0.00340651	0.00984103	2642	91	0	91	0.0332967	564.879	24.5958	2404.48	113.837	0.0450755	-0.0117788	1	1.09222
201	L17	SB-517081	1	treatment	COV362	190212_IDG_03	72	2663	0.555556	0.318235	0.0863337	0.0147116	0.00967867	0.0154859	2583	80	0	80	0.0300413	564.879	24.5958	2404.48	113.837	0.0450755	-0.0150342	2	1.06973
202	E20	SB-590885	1	treatment	COV362	190212_IDG_02	72	2282	0.530415	0.328111	0.102304	0.021659	0.000460829	0.0170507	2170	112	0	112	0.0490798	564.879	24.5958	2404.48	113.837	0.0450755	0.00400421	1	0.90417
202	E20	SB-590885	1	treatment	COV362	190212_IDG_03	72	2466	0.569427	0.311677	0.0887473	0.0144374	0	0.0157113	2355	111	0	111	0.0450122	564.879	24.5958	2404.48	113.837	0.0450755	-6.33794e-05	2	0.980198
203	J03	SB-633825	1	treatment	COV362	190212_IDG_02	72	2236	0.554991	0.323013	0.0887246	0.0198706	0.00415896	0.00924214	2164	72	0	72	0.0322004	564.879	24.5958	2404.48	113.837	0.0450755	-0.0128752	1	0.901649
203	J03	SB-633825	1	treatment	COV362	190212_IDG_03	72	2227	0.514623	0.374057	0.0849057	0.015566	0	0.0108491	2120	107	0	107	0.0480467	564.879	24.5958	2404.48	113.837	0.0450755	0.00297115	2	0.883047
204	I21	SB-693162/GW549034	1	treatment	COV362	190212_IDG_02	72	2484	0.599237	0.2905	0.07676	0.0186599	0	0.0148431	2358	126	0	126	0.0507246	564.879	24.5958	2404.48	113.837	0.0450755	0.00564909	1	0.981405
204	I21	SB-693162/GW549034	1	treatment	COV362	190212_IDG_03	72	2455	0.546987	0.324484	0.0943953	0.0130636	0.00842815	0.0126422	2373	82	0	82	0.0334012	564.879	24.5958	2404.48	113.837	0.0450755	-0.0116743	2	0.987426
205	I20	SB-708998	1	treatment	COV362	190212_IDG_02	72	2384	0.561224	0.314552	0.0878438	0.0186335	0	0.0177462	2254	130	0	130	0.0545302	564.879	24.5958	2404.48	113.837	0.0450755	0.00945466	1	0.939094
205	I20	SB-708998	1	treatment	COV362	190212_IDG_03	72	2654	0.535857	0.326295	0.0972112	0.0135458	0.0155378	0.0115538	2510	144	0	144	0.0542577	564.879	24.5958	2404.48	113.837	0.0450755	0.00918218	2	1.04153
206	N05	SB-710397	1	treatment	COV362	190212_IDG_02	72	2170	0.546584	0.330626	0.0821787	0.0162446	0.0157668	0.0086001	2093	77	0	77	0.0354839	564.879	24.5958	2404.48	113.837	0.0450755	-0.00959167	1	0.871532
206	N05	SB-710397	1	treatment	COV362	190212_IDG_03	72	2219	0.521719	0.363382	0.0864082	0.0149463	0.00233536	0.0112097	2141	78	0	78	0.035151	564.879	24.5958	2404.48	113.837	0.0450755	-0.00992458	2	0.89195
207	D15	SB-725317	1	treatment	COV362	190212_IDG_02	72	1975	0.473908	0.353568	0.129393	0.0244941	0.00106496	0.0175719	1878	97	0	97	0.0491139	564.879	24.5958	2404.48	113.837	0.0450755	0.00403838	1	0.776932
207	D15	SB-725317	1	treatment	COV362	190212_IDG_03	72	1871	0.450029	0.350086	0.137065	0.0342661	0.0011422	0.0274129	1751	120	0	120	0.0641368	564.879	24.5958	2404.48	113.837	0.0450755	0.0190613	2	0.718379
208	N08	SB-732932	1	treatment	COV362	190212_IDG_02	72	2437	0.542169	0.322289	0.10241	0.0129088	0.0111876	0.00903614	2324	113	0	113	0.0463685	564.879	24.5958	2404.48	113.837	0.0450755	0.00129294	1	0.967681
208	N08	SB-732932	1	treatment	COV362	190212_IDG_03	72	2543	0.542154	0.331386	0.0989149	0.0129382	0	0.0146077	2396	147	0	147	0.0578057	564.879	24.5958	2404.48	113.837	0.0450755	0.0127302	2	0.996621
209	L19	SB-733894	1	treatment	COV362	190212_IDG_02	72	2633	0.548965	0.316083	0.0903662	0.0187102	0.0127389	0.0131369	2512	121	0	121	0.0459552	564.879	24.5958	2404.48	113.837	0.0450755	0.000879639	1	1.04231
209	L19	SB-733894	1	treatment	COV362	190212_IDG_03	72	2487	0.544463	0.335151	0.0792785	0.0239094	0.00125839	0.0159396	2384	103	0	103	0.0414154	564.879	24.5958	2404.48	113.837	0.0450755	-0.00366018	2	0.99183
210	J11	SB-735464	1	treatment	COV362	190212_IDG_02	72	2813	0.545421	0.338095	0.0897436	0.0124542	0.003663	0.0106227	2730	83	0	83	0.0295059	564.879	24.5958	2404.48	113.837	0.0450755	-0.0155697	1	1.12528
210	J11	SB-735464	1	treatment	COV362	190212_IDG_03	72	2684	0.53742	0.341959	0.0879777	0.0131369	0.00636943	0.0131369	2512	172	0	172	0.0640835	564.879	24.5958	2404.48	113.837	0.0450755	0.0190079	2	1.04231
211	K18	SB-742609	1	treatment	COV362	190212_IDG_02	72	2419	0.54241	0.324924	0.103088	0.0200087	0	0.00956938	2299	120	0	120	0.0496073	564.879	24.5958	2404.48	113.837	0.0450755	0.00453173	1	0.957524
211	K18	SB-742609	1	treatment	COV362	190212_IDG_03	72	2383	0.53345	0.346742	0.0878881	0.0153039	0	0.0166157	2287	96	0	96	0.0402854	564.879	24.5958	2404.48	113.837	0.0450755	-0.00479019	2	0.952627
212	F10	SB-747651A	1	treatment	COV362	190212_IDG_02	72	2729	0.573111	0.304216	0.0846943	0.0155716	0.0174706	0.00493733	2633	96	0	96	0.0351777	564.879	24.5958	2404.48	113.837	0.0450755	-0.00989782	1	1.08881
212	F10	SB-747651A	1	treatment	COV362	190212_IDG_03	72	2588	0.561502	0.324681	0.0794728	0.0127796	0.0127796	0.00878594	2504	84	0	84	0.0324575	564.879	24.5958	2404.48	113.837	0.0450755	-0.012618	2	1.03919
213	N19	SB-772077-B	1	treatment	COV362	190212_IDG_02	72	2482	0.598673	0.281509	0.079602	0.0157546	0.00497512	0.0194859	2412	70	0	70	0.0282031	564.879	24.5958	2404.48	113.837	0.0450755	-0.0168725	1	1.00299
213	N19	SB-772077-B	1	treatment	COV362	190212_IDG_03	72	2214	0.579785	0.319139	0.0786149	0.0131025	0.000935891	0.00842302	2137	77	0	77	0.0347787	564.879	24.5958	2404.48	113.837	0.0450755	-0.0102969	2	0.890257
214	J15	TH257	1	treatment	COV362	190212_IDG_02	72	2830	0.534943	0.337358	0.0944018	0.0139041	0.00585437	0.0135382	2733	97	0	97	0.0342756	564.879	24.5958	2404.48	113.837	0.0450755	-0.0107999	1	1.1264
214	J15	TH257	1	treatment	COV362	190212_IDG_03	72	2714	0.558496	0.321059	0.092827	0.0161105	0.000383583	0.0111239	2607	107	0	107	0.0394252	564.879	24.5958	2404.48	113.837	0.0450755	-0.00565034	2	1.07891
215	M07	THZ1	1	treatment	COV362	190212_IDG_02	72	482	0.597826	0.00869565	0.273913	0.0782609	0.00217391	0.0391304	460	22	0	22	0.0456432	564.879	24.5958	2404.48	113.837	0.0450755	0.000567609	1	-0.0936086
215	M07	THZ1	1	treatment	COV362	190212_IDG_03	72	462	0.5962	0.0023753	0.273159	0.087886	0	0.04038	421	41	0	41	0.0887446	564.879	24.5958	2404.48	113.837	0.0450755	0.043669	2	-0.131232
216	J14	THZ531	1	treatment	COV362	190212_IDG_02	72	1289	0.507067	0.211131	0.166078	0.0565371	0.0273852	0.0318021	1132	157	0	157	0.1218	564.879	24.5958	2404.48	113.837	0.0450755	0.0767243	1	0.39465
216	J14	THZ531	1	treatment	COV362	190212_IDG_03	72	1293	0.507067	0.242933	0.175795	0.0547703	0.000883392	0.0185512	1132	161	0	161	0.124517	564.879	24.5958	2404.48	113.837	0.0450755	0.0794411	1	0.39465
217	K10	TPKI-100	1	treatment	COV362	190212_IDG_02	72	3017	0.558677	0.316501	0.0974395	0.0167141	0	0.0106686	2812	205	0	205	0.0679483	564.879	24.5958	2404.48	113.837	0.0450755	0.0228727	1	1.1556
217	K10	TPKI-100	1	treatment	COV362	190212_IDG_03	72	2614	0.548016	0.341667	0.0876984	0.0126984	0.000793651	0.00912698	2520	94	0	94	0.0359602	564.879	24.5958	2404.48	113.837	0.0450755	-0.00911533	2	1.04542
218	I19	TPKI-105	1	treatment	COV362	190212_IDG_02	72	2487	0.532462	0.349073	0.0897976	0.0143339	0	0.0143339	2372	115	0	115	0.0462405	564.879	24.5958	2404.48	113.837	0.0450755	0.00116491	1	0.987026
218	I19	TPKI-105	1	treatment	COV362	190212_IDG_03	72	2544	0.54625	0.33875	0.0841667	0.0141667	0.00333333	0.0133333	2400	144	0	144	0.0566038	564.879	24.5958	2404.48	113.837	0.0450755	0.0115282	2	0.998216
219	L18	TPKI-106	1	treatment	COV362	190212_IDG_02	72	2463	0.523447	0.35319	0.0874525	0.0173215	0	0.0185889	2367	96	0	96	0.0389769	564.879	24.5958	2404.48	113.837	0.0450755	-0.00609869	1	0.98502
219	L18	TPKI-106	1	treatment	COV362	190212_IDG_03	72	2669	0.553019	0.333978	0.0835913	0.0143189	0.00309598	0.0119969	2584	85	0	85	0.0318471	564.879	24.5958	2404.48	113.837	0.0450755	-0.0132284	2	1.07011
220	N17	TPKI-16	1	treatment	COV362	190212_IDG_02	72	1538	0.751001	0.137517	0.070761	0.0153538	0.0160214	0.00934579	1498	40	0	40	0.0260078	564.879	24.5958	2404.48	113.837	0.0450755	-0.0190677	1	0.594728
220	N17	TPKI-16	1	treatment	COV362	190212_IDG_03	72	1341	0.774562	0.113481	0.0708302	0.0144707	0.0144707	0.0121858	1313	28	0	28	0.0208799	564.879	24.5958	2404.48	113.837	0.0450755	-0.0241956	2	0.497241
221	N15	TPKI-24	1	treatment	COV362	190212_IDG_02	72	666	0.137031	0.146819	0.265905	0.0538336	0.00489396	0.388254	613	53	0	53	0.0795796	564.879	24.5958	2404.48	113.837	0.0450755	0.034504	1	0.0398971
221	N15	TPKI-24	1	treatment	COV362	190212_IDG_03	72	588	0.0904159	0.173599	0.276673	0.074141	0.00723327	0.377939	553	35	0	35	0.0595238	564.879	24.5958	2404.48	113.837	0.0450755	0.0144483	2	-0.0101192
222	K11	TPKI-26	1	treatment	COV362	190212_IDG_02	72	847	0.174202	0.136968	0.329787	0.109043	0	0.25	752	95	0	95	0.112161	564.879	24.5958	2404.48	113.837	0.0450755	0.067085	1	0.146737
222	K11	TPKI-26	1	treatment	COV362	190212_IDG_03	72	844	0.203125	0.233073	0.292969	0.0598958	0.00390625	0.1875	768	76	0	76	0.0900474	564.879	24.5958	2404.48	113.837	0.0450755	0.0449718	2	0.158349
223	J12	TPKI-39	1	treatment	COV362	190212_IDG_02	72	2680	0.521198	0.341501	0.0898483	0.0206145	0.0175029	0.00933489	2571	109	0	109	0.0406716	564.879	24.5958	2404.48	113.837	0.0450755	-0.0044039	1	1.06512
223	J12	TPKI-39	1	treatment	COV362	190212_IDG_03	72	2702	0.566214	0.326214	0.0831068	0.0104854	0.0015534	0.0124272	2575	127	0	127	0.0470022	564.879	24.5958	2404.48	113.837	0.0450755	0.00192668	2	1.06666
224	K19	TPKI-58	1	treatment	COV362	190212_IDG_02	72	2617	0.570451	0.308776	0.0869565	0.0144928	0.0100644	0.00925926	2484	133	0	133	0.0508216	564.879	24.5958	2404.48	113.837	0.0450755	0.00574601	1	1.03138
224	K19	TPKI-58	1	treatment	COV362	190212_IDG_03	72	2342	0.553532	0.318525	0.0995113	0.0151044	0.000888494	0.0124389	2251	91	0	91	0.0388557	564.879	24.5958	2404.48	113.837	0.0450755	-0.00621987	2	0.937858
225	J13	TPKI-69	1	treatment	COV362	190212_IDG_02	72	2657	0.562132	0.314387	0.0842807	0.0180321	0.00980008	0.0113681	2551	106	0	106	0.0398946	564.879	24.5958	2404.48	113.837	0.0450755	-0.00518093	1	1.05742
225	J13	TPKI-69	1	treatment	COV362	190212_IDG_03	72	2590	0.541262	0.339401	0.0817152	0.0157767	0.0141586	0.00768608	2472	118	0	118	0.0455598	564.879	24.5958	2404.48	113.837	0.0450755	0.000484301	2	1.02668
226	D13	TPKI-72	1	treatment	COV362	190212_IDG_02	72	2698	0.566256	0.30547	0.0859014	0.0200308	0.00539291	0.0169492	2596	102	0	102	0.0378058	564.879	24.5958	2404.48	113.837	0.0450755	-0.00726976	1	1.07471
226	D13	TPKI-72	1	treatment	COV362	190212_IDG_03	72	2508	0.578903	0.308861	0.0864979	0.0151899	0	0.0105485	2370	138	0	138	0.0550239	564.879	24.5958	2404.48	113.837	0.0450755	0.00994838	2	0.986224
227	D21	TPKI-85	1	treatment	COV362	190212_IDG_02	72	2637	0.536556	0.332801	0.0906912	0.0167799	0.00719137	0.0159808	2503	134	0	134	0.0508153	564.879	24.5958	2404.48	113.837	0.0450755	0.00573978	1	1.0388
227	D21	TPKI-85	1	treatment	COV362	190212_IDG_03	72	2493	0.520519	0.345896	0.100084	0.0142379	0	0.019263	2388	105	0	105	0.0421179	564.879	24.5958	2404.48	113.837	0.0450755	-0.00295761	2	0.993428
228	H04	TPKI-91	1	treatment	COV362	190212_IDG_02	72	2463	0.526672	0.34293	0.0910246	0.0169348	0.0118544	0.0105843	2362	101	0	101	0.0410069	564.879	24.5958	2404.48	113.837	0.0450755	-0.00406864	1	0.983013
228	H04	TPKI-91	1	treatment	COV362	190212_IDG_03	72	2072	0.531894	0.352084	0.0803616	0.0226017	0	0.0130588	1991	81	0	81	0.0390927	564.879	24.5958	2404.48	113.837	0.0450755	-0.00598288	2	0.827318
229	E19	TPKI-97	1	treatment	COV362	190212_IDG_02	72	2539	0.532038	0.36048	0.0777181	0.0165358	0.000413394	0.0128152	2419	120	0	120	0.0472627	564.879	24.5958	2404.48	113.837	0.0450755	0.00218716	1	1.00577
229	E19	TPKI-97	1	treatment	COV362	190212_IDG_03	72	2716	0.544432	0.332945	0.0900272	0.0166861	0.00155219	0.0143578	2577	139	0	139	0.0511782	564.879	24.5958	2404.48	113.837	0.0450755	0.00610266	2	1.06743
230	E21	TX-85-1	1	treatment	COV362	190212_IDG_02	72	2662	0.597484	0.29717	0.0715409	0.0200472	0	0.0137579	2544	118	0	118	0.0443276	564.879	24.5958	2404.48	113.837	0.0450755	-0.000747972	1	1.05472
230	E21	TX-85-1	1	treatment	COV362	190212_IDG_03	72	2645	0.57577	0.308277	0.0815674	0.0159936	0	0.0183926	2501	144	0	144	0.0544423	564.879	24.5958	2404.48	113.837	0.0450755	0.0093668	2	1.03802
231	H11	UNC-AA-1-0013 (SGC-AAK1-1)	1	treatment	COV362	190212_IDG_02	72	2325	0.572523	0.304955	0.0846847	0.0166667	0.0121622	0.00900901	2220	105	0	105	0.0451613	564.879	24.5958	2404.48	113.837	0.0450755	8.57455e-05	1	0.925041
231	H11	UNC-AA-1-0013 (SGC-AAK1-1)	1	treatment	COV362	190212_IDG_03	72	2355	0.540286	0.346016	0.0747538	0.0196956	0.00671441	0.0125336	2234	121	0	121	0.05138	564.879	24.5958	2404.48	113.837	0.0450755	0.0063045	2	0.930841
232	K07	UNC-AA-1-0017	1	treatment	COV362	190212_IDG_02	72	2259	0.55623	0.336444	0.0825945	0.0163322	0	0.00839944	2143	116	0	116	0.0513502	564.879	24.5958	2404.48	113.837	0.0450755	0.00627461	1	0.892795
232	K07	UNC-AA-1-0017	1	treatment	COV362	190212_IDG_03	72	2250	0.562125	0.330254	0.0799076	0.0166282	0	0.0110855	2165	85	0	85	0.0377778	564.879	24.5958	2404.48	113.837	0.0450755	-0.00729777	2	0.902069
233	G14	VE-821	1	treatment	COV362	190212_IDG_02	72	2420	0.529694	0.347598	0.0908297	0.0170306	0.000436681	0.0144105	2290	130	0	130	0.053719	564.879	24.5958	2404.48	113.837	0.0450755	0.00864346	1	0.953853
233	G14	VE-821	1	treatment	COV362	190212_IDG_03	72	2701	0.556197	0.337952	0.0731332	0.0150115	0.00615858	0.0115473	2598	103	0	103	0.038134	564.879	24.5958	2404.48	113.837	0.0450755	-0.00694152	2	1.07547
234	E18	VE-822	1	treatment	COV362	190212_IDG_02	72	2512	0.525402	0.323031	0.0969517	0.0249788	0	0.0296359	2362	150	0	150	0.0597134	564.879	24.5958	2404.48	113.837	0.0450755	0.0146378	1	0.983013
234	E18	VE-822	1	treatment	COV362	190212_IDG_03	72	2623	0.536308	0.322515	0.0868154	0.0223124	0	0.0320487	2465	158	0	158	0.0602364	564.879	24.5958	2404.48	113.837	0.0450755	0.0151608	2	1.02393
235	H13	Vertex 11e	1	treatment	COV362	190212_IDG_02	72	2219	0.582703	0.296786	0.0779773	0.018431	0.00567108	0.018431	2116	103	0	103	0.0464173	564.879	24.5958	2404.48	113.837	0.0450755	0.00134176	1	0.881346
235	H13	Vertex 11e	1	treatment	COV362	190212_IDG_03	72	2189	0.604167	0.287879	0.0719697	0.0217803	0	0.0142045	2112	77	0	77	0.0351759	564.879	24.5958	2404.48	113.837	0.0450755	-0.00989967	2	0.879643
236	F22	WZ4003	1	treatment	COV362	190212_IDG_02	72	2508	0.528774	0.351126	0.0834028	0.0141785	0.00166806	0.0208507	2398	110	0	110	0.0438596	564.879	24.5958	2404.48	113.837	0.0450755	-0.0012159	1	0.997419
236	F22	WZ4003	1	treatment	COV362	190212_IDG_03	72	2341	0.546359	0.320669	0.0999548	0.0153777	0.000904568	0.0167345	2211	130	0	130	0.0555318	564.879	24.5958	2404.48	113.837	0.0450755	0.0104563	2	0.921302
237	I16	XMD-17-51	1	treatment	COV362	190212_IDG_02	72	805	0.0932945	0.169096	0.132653	0.0685131	0	0.536443	686	119	0	119	0.147826	564.879	24.5958	2404.48	113.837	0.0450755	0.102751	1	0.0974211
237	I16	XMD-17-51	1	treatment	COV362	190212_IDG_03	72	838	0.100275	0.153846	0.125	0.0714286	0	0.549451	728	110	0	110	0.131265	564.879	24.5958	2404.48	113.837	0.0450755	0.0861894	2	0.129076
238	F14	XMD8-87	1	treatment	COV362	190212_IDG_02	72	2683	0.535645	0.345665	0.0863198	0.0142582	0.00732177	0.01079	2595	88	0	88	0.0327991	564.879	24.5958	2404.48	113.837	0.0450755	-0.0122764	1	1.07433
238	F14	XMD8-87	1	treatment	COV362	190212_IDG_03	72	2321	0.58262	0.298064	0.0868978	0.0175597	0.000450248	0.0144079	2221	100	0	100	0.0430849	564.879	24.5958	2404.48	113.837	0.0450755	-0.00199067	2	0.925456
239	C20	XMD8-92	1	treatment	COV362	190212_IDG_02	72	2407	0.564304	0.324147	0.0826772	0.0148731	0	0.0139983	2286	121	0	121	0.05027	564.879	24.5958	2404.48	113.837	0.0450755	0.0051945	1	0.952219
239	C20	XMD8-92	1	treatment	COV362	190212_IDG_03	72	2641	0.562701	0.313505	0.0848071	0.0213023	0	0.0176849	2488	153	0	153	0.0579326	564.879	24.5958	2404.48	113.837	0.0450755	0.0128571	2	1.03295
118	H21	AH5015	1	treatment	Cas1	190226_IDG_53	72	705	0.489002	0.145516	0.22335	0.0609137	0	0.0812183	591	114	0	114	0.161702	200.243	35.7917	515.808	76.7692	0.12912	0.0325817	1	1.20965
118	H21	AH5015	1	treatment	Cas1	190226_IDG_54	72	533	0.471366	0.19163	0.213656	0.0374449	0	0.0859031	454	79	0	79	0.148218	200.243	35.7917	515.808	76.7692	0.12912	0.0190972	2	0.821474
103	H06	BI00007366	1	treatment	Cas1	190226_IDG_53	72	599	0.532833	0.136961	0.189493	0.0450281	0.0131332	0.0825516	533	66	0	66	0.110184	200.243	35.7917	515.808	76.7692	0.12912	-0.0189368	1	1.04862
103	H06	BI00007366	1	treatment	Cas1	190226_IDG_54	72	572	0.46493	0.234469	0.186373	0.0340681	0.00400802	0.0761523	499	73	0	73	0.127622	200.243	35.7917	515.808	76.7692	0.12912	-0.0014981	2	0.952048
134	I17	BI00009348	1	treatment	Cas1	190226_IDG_53	72	668	0.439316	0.181197	0.246154	0.0461538	0.00683761	0.0803419	585	83	0	83	0.124251	200.243	35.7917	515.808	76.7692	0.12912	-0.00486898	1	1.1932
134	I17	BI00009348	1	treatment	Cas1	190226_IDG_54	72	641	0.529304	0.181319	0.199634	0.0311355	0	0.0586081	546	95	0	95	0.148206	200.243	35.7917	515.808	76.7692	0.12912	0.0190855	2	1.0851
215	M18	BI00036838	1	treatment	Cas1	190226_IDG_53	72	409	0.589971	0.0353982	0.244838	0.0560472	0.020649	0.0530973	339	70	0	70	0.171149	200.243	35.7917	515.808	76.7692	0.12912	0.0420287	1	0.470598
215	M18	BI00036838	1	treatment	Cas1	190226_IDG_54	72	555	0.581731	0.0432692	0.252404	0.0528846	0.0120192	0.0576923	416	139	0	139	0.25045	200.243	35.7917	515.808	76.7692	0.12912	0.12133	2	0.708494
163	K06	BI00047804	1	treatment	Cas1	190226_IDG_53	72	625	0.510018	0.149362	0.214936	0.0273224	0.00910747	0.0892532	549	76	0	76	0.1216	200.243	35.7917	515.808	76.7692	0.12912	-0.00752048	1	1.09349
163	K06	BI00047804	1	treatment	Cas1	190226_IDG_54	72	613	0.521318	0.156977	0.238372	0.0251938	0.00581395	0.0523256	516	97	0	97	0.158238	200.243	35.7917	515.808	76.7692	0.12912	0.0291177	2	1.00055
81	G04	BI00113608	1	treatment	Cas1	190226_IDG_53	72	517	0.421739	0.171739	0.25	0.0391304	0	0.117391	460	57	0	57	0.110251	200.243	35.7917	515.808	76.7692	0.12912	-0.018869	1	0.839078
81	G04	BI00113608	1	treatment	Cas1	190226_IDG_54	72	504	0.53972	0.151869	0.21729	0.0350467	0	0.0560748	428	76	0	76	0.150794	200.243	35.7917	515.808	76.7692	0.12912	0.0216732	2	0.744459
47	E10	BI00133844	1	treatment	Cas1	190226_IDG_53	72	631	0.440741	0.203704	0.2	0.0296296	0.0148148	0.111111	540	91	0	91	0.144216	200.243	35.7917	515.808	76.7692	0.12912	0.0150951	1	1.06829
47	E10	BI00133844	1	treatment	Cas1	190226_IDG_54	72	512	0.452055	0.146119	0.226027	0.0525114	0.0182648	0.105023	438	74	0	74	0.144531	200.243	35.7917	515.808	76.7692	0.12912	0.0154108	2	0.774224
112	H15	BI00601000	1	treatment	Cas1	190226_IDG_53	72	632	0.406977	0.16113	0.200997	0.0215947	0.111296	0.0863787	602	30	0	30	0.0474684	200.243	35.7917	515.808	76.7692	0.12912	-0.0816521	1	1.2397
112	H15	BI00601000	1	treatment	Cas1	190226_IDG_54	72	663	0.434851	0.167975	0.142857	0.0204082	0.128728	0.0926217	637	26	0	26	0.0392157	200.243	35.7917	515.808	76.7692	0.12912	-0.0899048	2	1.33437
18	C21	BI00604564	1	treatment	Cas1	190226_IDG_53	72	625	0.490706	0.141264	0.223048	0.0464684	0	0.098513	538	87	0	87	0.1392	200.243	35.7917	515.808	76.7692	0.12912	0.0100795	1	1.06268
18	C21	BI00604564	1	treatment	Cas1	190226_IDG_54	72	592	0.472973	0.19305	0.189189	0.0250965	0	0.119691	518	74	0	74	0.125	200.243	35.7917	515.808	76.7692	0.12912	-0.00412048	2	1.00622
191	L14	BI00614644	1	treatment	Cas1	190226_IDG_53	72	628	0.490196	0.158645	0.231729	0.0320856	0.00891266	0.0784314	561	67	0	67	0.106688	200.243	35.7917	515.808	76.7692	0.12912	-0.0224326	1	1.12691
191	L14	BI00614644	1	treatment	Cas1	190226_IDG_54	72	691	0.461409	0.25	0.174497	0.0302013	0	0.0838926	596	95	0	95	0.137482	200.243	35.7917	515.808	76.7692	0.12912	0.00836143	2	1.22333
96	G19	BI00645435	1	treatment	Cas1	190226_IDG_53	72	549	0.493392	0.118943	0.255507	0.030837	0	0.101322	454	95	0	95	0.173042	200.243	35.7917	515.808	76.7692	0.12912	0.0439214	1	0.821474
96	G19	BI00645435	1	treatment	Cas1	190226_IDG_54	72	505	0.528736	0.124138	0.255172	0.0298851	0	0.062069	435	70	0	70	0.138614	200.243	35.7917	515.808	76.7692	0.12912	0.00949338	2	0.765314
78	F21	BI00801818	1	treatment	Cas1	190226_IDG_53	72	504	0.458333	0.175926	0.24537	0.0462963	0	0.0740741	432	72	0	72	0.142857	200.243	35.7917	515.808	76.7692	0.12912	0.0137367	1	0.756387
78	F21	BI00801818	1	treatment	Cas1	190226_IDG_54	72	634	0.462547	0.189139	0.23221	0.0318352	0	0.0842697	534	100	0	100	0.157729	200.243	35.7917	515.808	76.7692	0.12912	0.0286082	2	1.05143
171	K14	BI00865461	1	treatment	Cas1	190226_IDG_53	72	642	0.502618	0.176265	0.211169	0.0279232	0.0017452	0.0802792	573	69	0	69	0.107477	200.243	35.7917	515.808	76.7692	0.12912	-0.0216438	1	1.16015
171	K14	BI00865461	1	treatment	Cas1	190226_IDG_54	72	622	0.443831	0.19337	0.235727	0.0441989	0.00184162	0.0810313	543	79	0	79	0.12701	200.243	35.7917	515.808	76.7692	0.12912	-0.00211083	2	1.0767
178	K21	BI01125081	1	treatment	Cas1	190226_IDG_53	72	627	0.476809	0.170686	0.211503	0.0408163	0	0.100186	539	88	0	88	0.140351	200.243	35.7917	515.808	76.7692	0.12912	0.0112304	1	1.06549
178	K21	BI01125081	1	treatment	Cas1	190226_IDG_54	72	636	0.450091	0.215971	0.217786	0.0326679	0.00907441	0.0744102	551	85	0	85	0.133648	200.243	35.7917	515.808	76.7692	0.12912	0.00452732	2	1.09907
173	K16	BI2536	1	treatment	Cas1	190226_IDG_53	72	281	0.32	0.0333333	0.313333	0.113333	0	0.22	150	131	0	131	0.466192	200.243	35.7917	515.808	76.7692	0.12912	0.337072	1	-0.190737
173	K16	BI2536	1	treatment	Cas1	190226_IDG_54	72	254	0.210884	0.0748299	0.428571	0.136054	0	0.14966	147	107	0	107	0.42126	200.243	35.7917	515.808	76.7692	0.12912	0.292139	2	-0.202625
165	K08	BIBF0846CL	1	treatment	Cas1	190226_IDG_53	72	630	0.491773	0.201097	0.184644	0.0438757	0	0.0786106	547	83	0	83	0.131746	200.243	35.7917	515.808	76.7692	0.12912	0.00262555	1	1.0879
165	K08	BIBF0846CL	1	treatment	Cas1	190226_IDG_54	72	657	0.462247	0.200737	0.189687	0.0441989	0.0349908	0.06814	543	114	0	114	0.173516	200.243	35.7917	515.808	76.7692	0.12912	0.0443955	2	1.0767
46	E09	BIBW3133BS	1	treatment	Cas1	190226_IDG_53	72	609	0.50369	0.166052	0.219557	0.0295203	0.00553506	0.0756458	542	67	0	67	0.110016	200.243	35.7917	515.808	76.7692	0.12912	-0.0191041	1	1.0739
46	E09	BIBW3133BS	1	treatment	Cas1	190226_IDG_54	72	486	0.508159	0.156177	0.235431	0.030303	0.004662	0.0652681	429	57	0	57	0.117284	200.243	35.7917	515.808	76.7692	0.12912	-0.0118365	2	0.747444
177	K20	BIRB0876BS	1	treatment	Cas1	190226_IDG_53	72	651	0.471795	0.133333	0.246154	0.0358974	0.0034188	0.109402	585	66	0	66	0.101382	200.243	35.7917	515.808	76.7692	0.12912	-0.027738	1	1.1932
177	K20	BIRB0876BS	1	treatment	Cas1	190226_IDG_54	72	599	0.480315	0.208661	0.188976	0.0413386	0	0.0807087	508	91	0	91	0.15192	200.243	35.7917	515.808	76.7692	0.12912	0.0227994	2	0.977778
68	F11	BIRZ0518XX	1	treatment	Cas1	190226_IDG_53	72	503	0.507973	0.123007	0.241458	0.047836	0.0205011	0.0592255	439	64	0	64	0.127237	200.243	35.7917	515.808	76.7692	0.12912	-0.0018839	1	0.777191
68	F11	BIRZ0518XX	1	treatment	Cas1	190226_IDG_54	72	660	0.518584	0.169912	0.217699	0.0247788	0	0.0690265	565	95	0	95	0.143939	200.243	35.7917	515.808	76.7692	0.12912	0.0148189	2	1.13801
75	F18	BMX-IN-1	1	treatment	Cas1	190226_IDG_53	72	627	0.453721	0.172414	0.245009	0.0362976	0	0.092559	551	76	0	76	0.121212	200.243	35.7917	515.808	76.7692	0.12912	-0.00790836	1	1.09907
75	F18	BMX-IN-1	1	treatment	Cas1	190226_IDG_54	72	615	0.48785	0.201869	0.207477	0.0299065	0	0.0728972	535	80	0	80	0.130081	200.243	35.7917	515.808	76.7692	0.12912	0.000960824	2	1.05425
61	F04	CA93.0	1	treatment	Cas1	190226_IDG_53	72	591	0.534709	0.180113	0.178236	0.0243902	0	0.0825516	533	58	0	58	0.0981387	200.243	35.7917	515.808	76.7692	0.12912	-0.0309817	1	1.04862
61	F04	CA93.0	1	treatment	Cas1	190226_IDG_54	72	576	0.477583	0.179337	0.194932	0.0331384	0.00779727	0.107212	513	63	0	63	0.109375	200.243	35.7917	515.808	76.7692	0.12912	-0.0197455	2	0.992019
121	I04	CCT241533	1	treatment	Cas1	190226_IDG_53	72	644	0.546931	0.194946	0.144404	0.0379061	0	0.0758123	554	90	0	90	0.139752	200.243	35.7917	515.808	76.7692	0.12912	0.0106311	1	1.10744
121	I04	CCT241533	1	treatment	Cas1	190226_IDG_54	72	478	0.535377	0.167453	0.200472	0.0377358	0	0.0589623	424	54	0	54	0.112971	200.243	35.7917	515.808	76.7692	0.12912	-0.0161498	2	0.732501
21	D04	CCT244747	1	treatment	Cas1	190226_IDG_53	72	545	0.506522	0.169565	0.193478	0.0630435	0	0.0673913	460	85	0	85	0.155963	200.243	35.7917	515.808	76.7692	0.12912	0.0268428	1	0.839078
21	D04	CCT244747	1	treatment	Cas1	190226_IDG_54	72	620	0.50303	0.151515	0.193939	0.0646465	0	0.0868687	495	125	0	125	0.201613	200.243	35.7917	515.808	76.7692	0.12912	0.0724924	2	0.940573
135	I18	CCT251545	1	treatment	Cas1	190226_IDG_53	72	446	0.516373	0.103275	0.246851	0.0503778	0.00503778	0.0780856	397	49	0	49	0.109865	200.243	35.7917	515.808	76.7692	0.12912	-0.019255	1	0.650975
135	I18	CCT251545	1	treatment	Cas1	190226_IDG_54	72	503	0.598131	0.102804	0.184579	0.0514019	0	0.0630841	428	75	0	75	0.149105	200.243	35.7917	515.808	76.7692	0.12912	0.0199849	2	0.744459
60	F03	CCT251921	1	treatment	Cas1	190226_IDG_53	72	315	0.547368	0.115789	0.203509	0.0280702	0.0140351	0.0912281	285	30	0	30	0.0952381	200.243	35.7917	515.808	76.7692	0.12912	-0.0338824	1	0.295067
60	F03	CCT251921	1	treatment	Cas1	190226_IDG_54	72	355	0.563934	0.12459	0.216393	0.0327869	0.0196721	0.042623	305	50	0	50	0.140845	200.243	35.7917	515.808	76.7692	0.12912	0.0117246	2	0.361036
183	L06	D2202-1	1	treatment	Cas1	190226_IDG_53	72	610	0.431159	0.210145	0.221014	0.0362319	0.0126812	0.0887681	552	58	0	58	0.095082	200.243	35.7917	515.808	76.7692	0.12912	-0.0340385	1	1.10186
183	L06	D2202-1	1	treatment	Cas1	190226_IDG_54	72	618	0.44894	0.198459	0.225434	0.0366089	0	0.0905588	519	99	0	99	0.160194	200.243	35.7917	515.808	76.7692	0.12912	0.0310737	2	1.00906
16	C19	DDR1-IN-1	1	treatment	Cas1	190226_IDG_53	72	720	0.496894	0.164596	0.218944	0.0263975	0.0108696	0.0822981	644	76	0	76	0.105556	200.243	35.7917	515.808	76.7692	0.12912	-0.0235649	1	1.35314
16	C19	DDR1-IN-1	1	treatment	Cas1	190226_IDG_54	72	564	0.489022	0.143713	0.223553	0.0399202	0.00598802	0.0978044	501	63	0	63	0.111702	200.243	35.7917	515.808	76.7692	0.12912	-0.0174183	2	0.957776
14	C17	ERK5-IN-1	1	treatment	Cas1	190226_IDG_53	72	463	0.546599	0.120907	0.241814	0.0327456	0	0.0579345	397	66	0	66	0.142549	200.243	35.7917	515.808	76.7692	0.12912	0.0134281	1	0.650975
14	C17	ERK5-IN-1	1	treatment	Cas1	190226_IDG_54	72	505	0.543641	0.139651	0.219451	0.0448878	0	0.0523691	401	104	0	104	0.205941	200.243	35.7917	515.808	76.7692	0.12912	0.0768201	2	0.663144
181	L04	FM-381	1	treatment	Cas1	190226_IDG_53	72	613	0.464151	0.207547	0.196226	0.0396226	0.0150943	0.0773585	530	83	0	83	0.1354	200.243	35.7917	515.808	76.7692	0.12912	0.0062792	1	1.04017
181	L04	FM-381	1	treatment	Cas1	190226_IDG_54	72	667	0.477718	0.165775	0.256684	0.0285205	0.00891266	0.0623886	561	106	0	106	0.158921	200.243	35.7917	515.808	76.7692	0.12912	0.0298001	2	1.12691
45	E08	GNF-5	1	treatment	Cas1	190226_IDG_53	72	551	0.429769	0.176101	0.234801	0.0566038	0	0.102725	477	74	0	74	0.134301	200.243	35.7917	515.808	76.7692	0.12912	0.00518079	1	0.888624
45	E08	GNF-5	1	treatment	Cas1	190226_IDG_54	72	526	0.521064	0.172949	0.172949	0.0354767	0	0.097561	451	75	0	75	0.142586	200.243	35.7917	515.808	76.7692	0.12912	0.0134651	2	0.812649
74	F17	GR269666A	1	treatment	Cas1	190226_IDG_53	72	596	0.471374	0.19084	0.236641	0.0343511	0	0.0667939	524	72	0	72	0.120805	200.243	35.7917	515.808	76.7692	0.12912	-0.00831511	1	1.02322
74	F17	GR269666A	1	treatment	Cas1	190226_IDG_54	72	557	0.454352	0.195329	0.235669	0.0318471	0	0.0828025	471	86	0	86	0.154399	200.243	35.7917	515.808	76.7692	0.12912	0.0252781	2	0.871192
218	M21	GSK1070916	1	treatment	Cas1	190226_IDG_53	72	348	0.234127	0.0833333	0.305556	0.134921	0	0.242063	252	96	0	96	0.275862	200.243	35.7917	515.808	76.7692	0.12912	0.146742	1	0.183427
218	M21	GSK1070916	1	treatment	Cas1	190226_IDG_54	72	299	0.197026	0.118959	0.200743	0.0817844	0.174721	0.226766	269	30	0	30	0.100334	200.243	35.7917	515.808	76.7692	0.12912	-0.028786	2	0.241397
13	C16	GSK1122999	1	treatment	Cas1	190226_IDG_53	72	571	0.4122	0.182994	0.205176	0.00554529	0.0887246	0.101664	541	30	0	30	0.0525394	200.243	35.7917	515.808	76.7692	0.12912	-0.0765811	1	1.0711
13	C16	GSK1122999	1	treatment	Cas1	190226_IDG_54	72	706	0.450082	0.220949	0.212766	0.0278232	0	0.0883797	611	95	0	95	0.134561	200.243	35.7917	515.808	76.7692	0.12912	0.00544043	2	1.26419
192	L15	GSK114	1	treatment	Cas1	190226_IDG_53	72	598	0.473585	0.201887	0.228302	0.0264151	0.00754717	0.0622642	530	68	0	68	0.113712	200.243	35.7917	515.808	76.7692	0.12912	-0.0154081	1	1.04017
192	L15	GSK114	1	treatment	Cas1	190226_IDG_54	72	587	0.488281	0.175781	0.224609	0.0332031	0.00976562	0.0683594	512	75	0	75	0.127768	200.243	35.7917	515.808	76.7692	0.12912	-0.00135216	2	0.989174
207	M10	GSK1379710	1	treatment	Cas1	190226_IDG_53	72	638	0.405354	0.185468	0.256214	0.0573614	0	0.0956023	523	115	0	115	0.180251	200.243	35.7917	515.808	76.7692	0.12912	0.0511303	1	1.02039
207	M10	GSK1379710	1	treatment	Cas1	190226_IDG_54	72	676	0.518644	0.155932	0.213559	0.0372881	0	0.0745763	590	86	0	86	0.127219	200.243	35.7917	515.808	76.7692	0.12912	-0.00190154	2	1.20691
211	M14	GSK1379712	1	treatment	Cas1	190226_IDG_53	72	556	0.487805	0.156504	0.22561	0.0345528	0.0101626	0.0853659	492	64	0	64	0.115108	200.243	35.7917	515.808	76.7692	0.12912	-0.0140126	1	0.93195
211	M14	GSK1379712	1	treatment	Cas1	190226_IDG_54	72	577	0.445489	0.159774	0.234962	0.0432331	0.0018797	0.114662	532	45	0	45	0.0779896	200.243	35.7917	515.808	76.7692	0.12912	-0.0511309	2	1.0458
116	H19	GSK1379761	1	treatment	Cas1	190226_IDG_53	72	603	0.452471	0.157795	0.247148	0.039924	0	0.102662	526	77	0	77	0.127695	200.243	35.7917	515.808	76.7692	0.12912	-0.00142562	1	1.02887
116	H19	GSK1379761	1	treatment	Cas1	190226_IDG_54	72	600	0.486381	0.161479	0.219844	0.0350195	0	0.0972763	514	86	0	86	0.143333	200.243	35.7917	515.808	76.7692	0.12912	0.0142129	2	0.994863
104	H07	GSK1379762	1	treatment	Cas1	190226_IDG_53	72	572	0.5	0.144309	0.223577	0.046748	0	0.0853659	492	80	0	80	0.13986	200.243	35.7917	515.808	76.7692	0.12912	0.0107397	1	0.93195
104	H07	GSK1379762	1	treatment	Cas1	190226_IDG_54	72	551	0.46371	0.205645	0.211694	0.0322581	0.00403226	0.0826613	496	55	0	55	0.0998185	200.243	35.7917	515.808	76.7692	0.12912	-0.029302	2	0.943444
119	H22	GSK1392956A	1	treatment	Cas1	190226_IDG_53	72	611	0.4197	0.115632	0.246253	0.0685225	0	0.149893	467	144	0	144	0.235679	200.243	35.7917	515.808	76.7692	0.12912	0.106559	1	0.859537
119	H22	GSK1392956A	1	treatment	Cas1	190226_IDG_54	72	461	0.430168	0.148045	0.265363	0.047486	0	0.108939	358	103	0	103	0.223427	200.243	35.7917	515.808	76.7692	0.12912	0.0943069	2	0.530535
105	H08	GSK1398477	1	treatment	Cas1	190226_IDG_53	72	556	0.494715	0.194503	0.179704	0.0359408	0	0.0951374	473	83	0	83	0.149281	200.243	35.7917	515.808	76.7692	0.12912	0.0201601	1	0.877009
105	H08	GSK1398477	1	treatment	Cas1	190226_IDG_54	72	550	0.429752	0.18595	0.227273	0.0557851	0	0.10124	484	66	0	66	0.12	200.243	35.7917	515.808	76.7692	0.12912	-0.00912048	2	0.908888
154	J17	GSK1838705	1	treatment	Cas1	190226_IDG_53	72	683	0.465753	0.178082	0.241438	0.0291096	0.00684932	0.0787671	584	99	0	99	0.144949	200.243	35.7917	515.808	76.7692	0.12912	0.0158283	1	1.19045
154	J17	GSK1838705	1	treatment	Cas1	190226_IDG_54	72	610	0.478764	0.196911	0.216216	0.034749	0	0.0733591	518	92	0	92	0.15082	200.243	35.7917	515.808	76.7692	0.12912	0.0216992	2	1.00622
190	L13	GSK1904529	1	treatment	Cas1	190226_IDG_53	72	637	0.410811	0.136937	0.266667	0.0486486	0	0.136937	555	82	0	82	0.128728	200.243	35.7917	515.808	76.7692	0.12912	-0.000392063	1	1.11023
190	L13	GSK1904529	1	treatment	Cas1	190226_IDG_54	72	639	0.480634	0.174296	0.207746	0.0264085	0.0264085	0.084507	568	71	0	71	0.111111	200.243	35.7917	515.808	76.7692	0.12912	-0.0180094	2	1.14632
82	G05	GSK190937	1	treatment	Cas1	190226_IDG_53	72	492	0.48	0.150588	0.24	0.0352941	0.00470588	0.0894118	425	67	0	67	0.136179	200.243	35.7917	515.808	76.7692	0.12912	0.00705838	1	0.735493
82	G05	GSK190937	1	treatment	Cas1	190226_IDG_54	72	641	0.460036	0.16341	0.241563	0.0408526	0	0.0941385	563	78	0	78	0.121685	200.243	35.7917	515.808	76.7692	0.12912	-0.00743561	2	1.13247
35	D18	GSK200398A	1	treatment	Cas1	190226_IDG_53	72	555	0.494802	0.168399	0.209979	0.024948	0.004158	0.0977131	481	74	0	74	0.133333	200.243	35.7917	515.808	76.7692	0.12912	0.00421286	1	0.900213
35	D18	GSK200398A	1	treatment	Cas1	190226_IDG_54	72	593	0.489524	0.171429	0.192381	0.0438095	0	0.102857	525	68	0	68	0.114671	200.243	35.7917	515.808	76.7692	0.12912	-0.0144493	2	1.02605
69	F12	GSK204607	1	treatment	Cas1	190226_IDG_53	72	580	0.457692	0.178846	0.215385	0.0480769	0.00576923	0.0942308	520	60	0	60	0.103448	200.243	35.7917	515.808	76.7692	0.12912	-0.0256722	1	1.0119
69	F12	GSK204607	1	treatment	Cas1	190226_IDG_54	72	598	0.537402	0.151575	0.212598	0.019685	0.00393701	0.0748031	508	90	0	90	0.150502	200.243	35.7917	515.808	76.7692	0.12912	0.0213812	2	0.977778
217	M20	GSK204919	1	treatment	Cas1	190226_IDG_53	72	384	0.394203	0.115942	0.310145	0.0347826	0	0.144928	345	39	0	39	0.101562	200.243	35.7917	515.808	76.7692	0.12912	-0.027558	1	0.48962
217	M20	GSK204919	1	treatment	Cas1	190226_IDG_54	72	401	0.382682	0.162011	0.223464	0.0363128	0	0.195531	358	43	0	43	0.107232	200.243	35.7917	515.808	76.7692	0.12912	-0.0218886	2	0.530535
205	M08	GSK2219385	1	treatment	Cas1	190226_IDG_53	72	649	0.469244	0.186292	0.216169	0.0386643	0.0123023	0.0773286	569	80	0	80	0.123267	200.243	35.7917	515.808	76.7692	0.12912	-0.00585391	1	1.14909
205	M08	GSK2219385	1	treatment	Cas1	190226_IDG_54	72	662	0.430034	0.168942	0.255973	0.0290102	0.0136519	0.102389	586	76	0	76	0.114804	200.243	35.7917	515.808	76.7692	0.12912	-0.0143169	2	1.19594
208	M11	GSK223675	1	treatment	Cas1	190226_IDG_53	72	495	0.453159	0.087146	0.254902	0.0392157	0.0108932	0.154684	459	36	0	36	0.0727273	200.243	35.7917	515.808	76.7692	0.12912	-0.0563932	1	0.836148
208	M11	GSK223675	1	treatment	Cas1	190226_IDG_54	72	454	0.50591	0.0898345	0.20331	0.0260047	0.00236407	0.172577	423	31	0	31	0.0682819	200.243	35.7917	515.808	76.7692	0.12912	-0.0608385	2	0.729507
185	L08	GSK2250882	1	treatment	Cas1	190226_IDG_53	72	600	0.528487	0.13556	0.196464	0.0412574	0.00785855	0.0903733	509	91	0	91	0.151667	200.243	35.7917	515.808	76.7692	0.12912	0.0225462	1	0.980629
185	L08	GSK2250882	1	treatment	Cas1	190226_IDG_54	72	708	0.470882	0.184692	0.21797	0.0299501	0.00166389	0.0948419	601	107	0	107	0.15113	200.243	35.7917	515.808	76.7692	0.12912	0.0220095	2	1.23698
122	I05	GSK2269557	1	treatment	Cas1	190226_IDG_53	72	497	0.478161	0.131034	0.232184	0.0482759	0.00689655	0.103448	435	62	0	62	0.124748	200.243	35.7917	515.808	76.7692	0.12912	-0.00437199	1	0.765314
122	I05	GSK2269557	1	treatment	Cas1	190226_IDG_54	72	552	0.477895	0.181053	0.237895	0.0315789	0	0.0715789	475	77	0	77	0.139493	200.243	35.7917	515.808	76.7692	0.12912	0.0103723	2	0.88282
31	D14	GSK2283293	1	treatment	Cas1	190226_IDG_53	72	674	0.434397	0.198582	0.23227	0.0319149	0	0.102837	564	110	0	110	0.163205	200.243	35.7917	515.808	76.7692	0.12912	0.0340843	1	1.13524
31	D14	GSK2283293	1	treatment	Cas1	190226_IDG_54	72	705	0.447712	0.210784	0.218954	0.0359477	0.00980392	0.0767974	612	93	0	93	0.131915	200.243	35.7917	515.808	76.7692	0.12912	0.00279442	2	1.2669
127	I10	GSK2288359	1	treatment	Cas1	190226_IDG_53	72	751	0.412674	0.200927	0.213292	0.0540958	0	0.119011	647	104	0	104	0.138482	200.243	35.7917	515.808	76.7692	0.12912	0.00936155	1	1.36116
127	I10	GSK2288359	1	treatment	Cas1	190226_IDG_54	72	571	0.495798	0.180672	0.201681	0.0483193	0	0.0735294	476	95	0	95	0.166375	200.243	35.7917	515.808	76.7692	0.12912	0.0372543	2	0.885723
123	I06	GSK2292767	1	treatment	Cas1	190226_IDG_53	72	539	0.481953	0.169851	0.235669	0.0382166	0.0254777	0.0488323	471	68	0	68	0.12616	200.243	35.7917	515.808	76.7692	0.12912	-0.00296092	1	0.871192
123	I06	GSK2292767	1	treatment	Cas1	190226_IDG_54	72	551	0.590022	0.151844	0.18872	0.0303688	0	0.0390456	461	90	0	90	0.163339	200.243	35.7917	515.808	76.7692	0.12912	0.0342189	2	0.842005
6	C09	GSK2297428	1	treatment	Cas1	190226_IDG_53	72	590	0.487619	0.142857	0.224762	0.0342857	0.032381	0.0780952	525	65	0	65	0.110169	200.243	35.7917	515.808	76.7692	0.12912	-0.018951	1	1.02605
6	C09	GSK2297428	1	treatment	Cas1	190226_IDG_54	72	567	0.458078	0.192229	0.245399	0.0265849	0.0122699	0.0654397	489	78	0	78	0.137566	200.243	35.7917	515.808	76.7692	0.12912	0.00844566	2	0.923314
126	I09	GSK2298859	1	treatment	Cas1	190226_IDG_53	72	630	0.533081	0.153119	0.185255	0.0359168	0.00378072	0.0888469	529	101	0	101	0.160317	200.243	35.7917	515.808	76.7692	0.12912	0.031197	1	1.03734
126	I09	GSK2298859	1	treatment	Cas1	190226_IDG_54	72	609	0.456767	0.144737	0.276316	0.0281955	0.0018797	0.0921053	532	77	0	77	0.126437	200.243	35.7917	515.808	76.7692	0.12912	-0.0026837	2	1.0458
86	G09	GSK2328680	1	treatment	Cas1	190226_IDG_53	72	522	0.473923	0.145125	0.235828	0.0657596	0	0.0793651	441	81	0	81	0.155172	200.243	35.7917	515.808	76.7692	0.12912	0.0260519	1	0.783118
86	G09	GSK2328680	1	treatment	Cas1	190226_IDG_54	72	521	0.5	0.164414	0.195946	0.0472973	0.00675676	0.0855856	444	77	0	77	0.147793	200.243	35.7917	515.808	76.7692	0.12912	0.0186722	2	0.791996
158	J21	GSK2334470	1	treatment	Cas1	190226_IDG_53	72	580	0.469758	0.165323	0.229839	0.0483871	0	0.0866935	496	84	0	84	0.144828	200.243	35.7917	515.808	76.7692	0.12912	0.0157071	1	0.943444
158	J21	GSK2334470	1	treatment	Cas1	190226_IDG_54	72	536	0.504348	0.193478	0.208696	0.0282609	0	0.0652174	460	76	0	76	0.141791	200.243	35.7917	515.808	76.7692	0.12912	0.0126706	2	0.839078
1	C04	GSK2336394	1	treatment	Cas1	190226_IDG_53	72	510	0.421176	0.164706	0.218824	0.0541176	0	0.141176	425	85	0	85	0.166667	200.243	35.7917	515.808	76.7692	0.12912	0.0375462	1	0.735493
1	C04	GSK2336394	1	treatment	Cas1	190226_IDG_54	72	552	0.502075	0.176349	0.211618	0.0352697	0	0.0746888	482	70	0	70	0.126812	200.243	35.7917	515.808	76.7692	0.12912	-0.00230888	2	0.903106
2	C05	GSK2373690	1	treatment	Cas1	190226_IDG_53	72	539	0.549669	0.11479	0.225166	0.0375276	0	0.0728477	453	86	0	86	0.159555	200.243	35.7917	515.808	76.7692	0.12912	0.0304343	1	0.818534
2	C05	GSK2373690	1	treatment	Cas1	190226_IDG_54	72	470	0.486559	0.188172	0.0645161	0.215054	0	0.0456989	372	98	0	98	0.208511	200.243	35.7917	515.808	76.7692	0.12912	0.0793902	2	0.574155
94	G17	GSK2376236	1	treatment	Cas1	190226_IDG_53	72	565	0.511828	0.184946	0.210753	0.0215054	0	0.0709677	465	100	0	100	0.176991	200.243	35.7917	515.808	76.7692	0.12912	0.0478707	1	0.8537
94	G17	GSK2376236	1	treatment	Cas1	190226_IDG_54	72	703	0.535649	0.206581	0.180987	0.0201097	0	0.0566728	547	156	0	156	0.221906	200.243	35.7917	515.808	76.7692	0.12912	0.0927856	2	1.0879
65	F08	GSK237701A	1	treatment	Cas1	190226_IDG_53	72	309	0.300654	0.0392157	0.333333	0.124183	0	0.202614	153	156	0	156	0.504854	200.243	35.7917	515.808	76.7692	0.12912	0.375734	1	-0.178912
65	F08	GSK237701A	1	treatment	Cas1	190226_IDG_54	72	344	0.3125	0.08125	0.38125	0.075	0	0.15	160	184	0	184	0.534884	200.243	35.7917	515.808	76.7692	0.12912	0.405763	2	-0.151557
156	J19	GSK2578215	1	treatment	Cas1	190226_IDG_53	72	615	0.505747	0.143678	0.229885	0.0268199	0.00383142	0.0900383	522	93	0	93	0.15122	200.243	35.7917	515.808	76.7692	0.12912	0.022099	1	1.01756
156	J19	GSK2578215	1	treatment	Cas1	190226_IDG_54	72	624	0.457306	0.16888	0.233397	0.0531309	0	0.0872865	527	97	0	97	0.155449	200.243	35.7917	515.808	76.7692	0.12912	0.0263282	2	1.0317
184	L07	GSK2606414	1	treatment	Cas1	190226_IDG_53	72	608	0.43787	0.177515	0.220907	0.0512821	0.025641	0.086785	507	101	0	101	0.166118	200.243	35.7917	515.808	76.7692	0.12912	0.0369979	1	0.974925
184	L07	GSK2606414	1	treatment	Cas1	190226_IDG_54	72	549	0.480176	0.160793	0.215859	0.030837	0.00660793	0.105727	454	95	0	95	0.173042	200.243	35.7917	515.808	76.7692	0.12912	0.0439214	2	0.821474
64	F07	GSK2656157	1	treatment	Cas1	190226_IDG_53	72	522	0.457014	0.217195	0.214932	0.0294118	0	0.081448	442	80	0	80	0.153257	200.243	35.7917	515.808	76.7692	0.12912	0.0241362	1	0.786079
64	F07	GSK2656157	1	treatment	Cas1	190226_IDG_54	72	532	0.432558	0.193023	0.244186	0.0488372	0	0.0813953	430	102	0	102	0.191729	200.243	35.7917	515.808	76.7692	0.12912	0.0626088	2	0.750427
5	C08	GSK270822A	1	treatment	Cas1	190226_IDG_53	72	520	0.493478	0.184783	0.234783	0.023913	0	0.0630435	460	60	0	60	0.115385	200.243	35.7917	515.808	76.7692	0.12912	-0.0137359	1	0.839078
5	C08	GSK270822A	1	treatment	Cas1	190226_IDG_54	72	453	0.521197	0.162095	0.224439	0.0224439	0	0.0698254	401	52	0	52	0.11479	200.243	35.7917	515.808	76.7692	0.12912	-0.0143302	2	0.663144
98	G21	GSK2850163	1	treatment	Cas1	190226_IDG_53	72	629	0.482375	0.181818	0.218924	0.0445269	0	0.0723562	539	90	0	90	0.143084	200.243	35.7917	515.808	76.7692	0.12912	0.0139638	1	1.06549
98	G21	GSK2850163	1	treatment	Cas1	190226_IDG_54	72	591	0.43088	0.197487	0.183124	0.021544	0.0861759	0.0771993	557	34	0	34	0.0575296	200.243	35.7917	515.808	76.7692	0.12912	-0.0715909	2	1.11579
97	G20	GSK299115A	1	treatment	Cas1	190226_IDG_53	72	529	0.510549	0.2173	0.196203	0.0232068	0	0.0527426	474	55	0	55	0.10397	200.243	35.7917	515.808	76.7692	0.12912	-0.0251507	1	0.879915
97	G20	GSK299115A	1	treatment	Cas1	190226_IDG_54	72	666	0.515957	0.171986	0.214539	0.035461	0	0.0620567	564	102	0	102	0.153153	200.243	35.7917	515.808	76.7692	0.12912	0.0240327	2	1.13524
28	D11	GSK312879	1	treatment	Cas1	190226_IDG_53	72	573	0.473477	0.204322	0.18664	0.0235756	0.0196464	0.0923379	509	64	0	64	0.111693	200.243	35.7917	515.808	76.7692	0.12912	-0.0174276	1	0.980629
28	D11	GSK312879	1	treatment	Cas1	190226_IDG_54	72	648	0.466786	0.170557	0.226212	0.0341113	0.010772	0.0915619	557	91	0	91	0.140432	200.243	35.7917	515.808	76.7692	0.12912	0.0113116	2	1.11579
29	D12	GSK336313	1	treatment	Cas1	190226_IDG_53	72	627	0.47156	0.170642	0.242202	0.0330275	0.0201835	0.0623853	545	82	0	82	0.130781	200.243	35.7917	515.808	76.7692	0.12912	0.00166102	1	1.08231
29	D12	GSK336313	1	treatment	Cas1	190226_IDG_54	72	670	0.462214	0.193322	0.182777	0.0316344	0.00878735	0.121265	569	101	0	101	0.150746	200.243	35.7917	515.808	76.7692	0.12912	0.0216258	2	1.14909
34	D17	GSK461364	1	treatment	Cas1	190226_IDG_53	72	301	0.257143	0.0642857	0.321429	0.157143	0	0.2	140	161	0	161	0.534884	200.243	35.7917	515.808	76.7692	0.12912	0.405763	1	-0.230621
34	D17	GSK461364	1	treatment	Cas1	190226_IDG_54	72	335	0.236486	0.0202703	0.432432	0.114865	0.0405405	0.155405	148	187	0	187	0.558209	200.243	35.7917	515.808	76.7692	0.12912	0.429088	2	-0.198655
187	L10	GSK481	1	treatment	Cas1	190226_IDG_53	72	619	0.429358	0.168807	0.256881	0.0440367	0.0183486	0.0825688	545	74	0	74	0.119548	200.243	35.7917	515.808	76.7692	0.12912	-0.00957282	1	1.08231
187	L10	GSK481	1	treatment	Cas1	190226_IDG_54	72	623	0.495512	0.175943	0.224417	0.021544	0.016158	0.0664273	557	66	0	66	0.105939	200.243	35.7917	515.808	76.7692	0.12912	-0.0231815	2	1.11579
125	I08	GSK579289A	1	treatment	Cas1	190226_IDG_53	72	330	0.326797	0.0457516	0.444444	0.0849673	0	0.0980392	153	177	0	177	0.536364	200.243	35.7917	515.808	76.7692	0.12912	0.407243	1	-0.178912
125	I08	GSK579289A	1	treatment	Cas1	190226_IDG_54	72	410	0.215789	0.0789474	0.384211	0.136842	0.110526	0.0736842	190	220	0	220	0.536585	200.243	35.7917	515.808	76.7692	0.12912	0.407465	2	-0.0377327
39	D22	GSK583	1	treatment	Cas1	190226_IDG_53	72	540	0.476615	0.144766	0.213808	0.0244989	0	0.140312	449	91	0	91	0.168519	200.243	35.7917	515.808	76.7692	0.12912	0.039398	1	0.806757
39	D22	GSK583	1	treatment	Cas1	190226_IDG_54	72	581	0.502083	0.139583	0.241667	0.0541667	0	0.0625	480	101	0	101	0.173838	200.243	35.7917	515.808	76.7692	0.12912	0.0447177	2	0.897318
212	M15	GSK840	1	treatment	Cas1	190226_IDG_53	72	657	0.472269	0.168067	0.210084	0.0436975	0.010084	0.0957983	595	62	0	62	0.0943683	200.243	35.7917	515.808	76.7692	0.12912	-0.0347521	1	1.2206
212	M15	GSK840	1	treatment	Cas1	190226_IDG_54	72	655	0.549565	0.16	0.198261	0.0295652	0.00521739	0.0573913	575	80	0	80	0.122137	200.243	35.7917	515.808	76.7692	0.12912	-0.00698307	2	1.16567
213	M16	GSK843	1	treatment	Cas1	190226_IDG_53	72	600	0.49711	0.179191	0.196532	0.0327553	0.00770713	0.0867052	519	81	0	81	0.135	200.243	35.7917	515.808	76.7692	0.12912	0.00587952	1	1.00906
213	M16	GSK843	1	treatment	Cas1	190226_IDG_54	72	640	0.507993	0.120782	0.22913	0.0319716	0.0284192	0.0817052	563	77	0	77	0.120313	200.243	35.7917	515.808	76.7692	0.12912	-0.00880798	2	1.13247
155	J18	GSK872	1	treatment	Cas1	190226_IDG_53	72	632	0.446097	0.169145	0.226766	0.0334572	0.00557621	0.118959	538	94	0	94	0.148734	200.243	35.7917	515.808	76.7692	0.12912	0.0196137	1	1.06268
155	J18	GSK872	1	treatment	Cas1	190226_IDG_54	72	609	0.533203	0.150391	0.189453	0.0410156	0	0.0859375	512	97	0	97	0.159278	200.243	35.7917	515.808	76.7692	0.12912	0.030157	2	0.989174
95	G18	GSK949675	1	treatment	Cas1	190226_IDG_53	72	610	0.533207	0.159393	0.182163	0.0493359	0.00759013	0.0683112	527	83	0	83	0.136066	200.243	35.7917	515.808	76.7692	0.12912	0.0069451	1	1.0317
95	G18	GSK949675	1	treatment	Cas1	190226_IDG_54	72	612	0.49323	0.170213	0.237911	0.032882	0	0.065764	517	95	0	95	0.155229	200.243	35.7917	515.808	76.7692	0.12912	0.0261083	2	1.00339
63	F06	GW276655	1	treatment	Cas1	190226_IDG_53	72	465	0.437037	0.148148	0.251852	0.0493827	0	0.11358	405	60	0	60	0.129032	200.243	35.7917	515.808	76.7692	0.12912	-8.8219e-05	1	0.675281
63	F06	GW276655	1	treatment	Cas1	190226_IDG_54	72	486	0.414392	0.238213	0.191067	0.057072	0.00992556	0.08933	403	83	0	83	0.170782	200.243	35.7917	515.808	76.7692	0.12912	0.0416614	2	0.669217
180	L03	GW280670X	1	treatment	Cas1	190226_IDG_53	72	503	0.448037	0.161663	0.244804	0.0323326	0.0161663	0.0969977	433	70	0	70	0.139165	200.243	35.7917	515.808	76.7692	0.12912	0.0100445	1	0.759365
180	L03	GW280670X	1	treatment	Cas1	190226_IDG_54	72	458	0.448878	0.147132	0.259352	0.042394	0	0.102244	401	57	0	57	0.124454	200.243	35.7917	515.808	76.7692	0.12912	-0.00466633	2	0.663144
124	I07	GW282449A	1	treatment	Cas1	190226_IDG_53	72	551	0.433333	0.208333	0.204167	0.0520833	0	0.102083	480	71	0	71	0.128857	200.243	35.7917	515.808	76.7692	0.12912	-0.000263853	1	0.897318
124	I07	GW282449A	1	treatment	Cas1	190226_IDG_54	72	550	0.481953	0.18896	0.225053	0.0339703	0	0.0700637	471	79	0	79	0.143636	200.243	35.7917	515.808	76.7692	0.12912	0.0145159	2	0.871192
159	J22	GW282974X	1	treatment	Cas1	190226_IDG_53	72	631	0.481413	0.182156	0.230483	0.035316	0	0.070632	538	93	0	93	0.147385	200.243	35.7917	515.808	76.7692	0.12912	0.0182646	1	1.06268
159	J22	GW282974X	1	treatment	Cas1	190226_IDG_54	72	566	0.437247	0.216599	0.234818	0.0384615	0	0.0728745	494	72	0	72	0.127208	200.243	35.7917	515.808	76.7692	0.12912	-0.001912	2	0.9377
206	M09	GW296115X	1	treatment	Cas1	190226_IDG_53	72	682	0.426146	0.203735	0.249576	0.0424448	0.00169779	0.0764007	589	93	0	93	0.136364	200.243	35.7917	515.808	76.7692	0.12912	0.00724316	1	1.20417
206	M09	GW296115X	1	treatment	Cas1	190226_IDG_54	72	748	0.528736	0.216749	0.162562	0.0328407	0	0.0591133	609	139	0	139	0.185829	200.243	35.7917	515.808	76.7692	0.12912	0.0567084	2	1.25875
72	F15	GW300657X	1	treatment	Cas1	190226_IDG_53	72	603	0.511765	0.14902	0.194118	0.0607843	0	0.0843137	510	93	0	93	0.154229	200.243	35.7917	515.808	76.7692	0.12912	0.0251084	1	0.983479
72	F15	GW300657X	1	treatment	Cas1	190226_IDG_54	72	667	0.545775	0.153169	0.197183	0.0369718	0.00704225	0.0598592	568	99	0	99	0.148426	200.243	35.7917	515.808	76.7692	0.12912	0.0193053	2	1.14632
12	C15	GW300660X	1	treatment	Cas1	190226_IDG_53	72	637	0.454707	0.207815	0.209591	0.035524	0	0.0923623	563	74	0	74	0.11617	200.243	35.7917	515.808	76.7692	0.12912	-0.0129509	1	1.13247
12	C15	GW300660X	1	treatment	Cas1	190226_IDG_54	72	544	0.435946	0.1587	0.173996	0.0210325	0.114723	0.08413	523	21	0	21	0.0386029	200.243	35.7917	515.808	76.7692	0.12912	-0.0905175	2	1.02039
100	H03	GW305074X (also GW5074)	1	treatment	Cas1	190226_IDG_53	72	596	0.470476	0.16	0.255238	0.0361905	0.0152381	0.0628571	525	71	0	71	0.119128	200.243	35.7917	515.808	76.7692	0.12912	-0.00999296	1	1.02605
100	H03	GW305074X (also GW5074)	1	treatment	Cas1	190226_IDG_54	72	515	0.535484	0.230108	0.141935	0.0473118	0.00860215	0.0365591	465	50	0	50	0.0970874	200.243	35.7917	515.808	76.7692	0.12912	-0.0320331	2	0.8537
42	E05	GW335962X	1	treatment	Cas1	190226_IDG_53	72	594	0.470363	0.166348	0.217973	0.040153	0	0.105163	523	71	0	71	0.119529	200.243	35.7917	515.808	76.7692	0.12912	-0.00959186	1	1.02039
42	E05	GW335962X	1	treatment	Cas1	190226_IDG_54	72	554	0.50211	0.183544	0.198312	0.0337553	0	0.0822785	474	80	0	80	0.144404	200.243	35.7917	515.808	76.7692	0.12912	0.0152839	2	0.879915
9	C12	GW406108X	1	treatment	Cas1	190226_IDG_53	72	586	0.454373	0.173004	0.237643	0.0361217	0.00760456	0.0912548	526	60	0	60	0.102389	200.243	35.7917	515.808	76.7692	0.12912	-0.0267314	1	1.02887
9	C12	GW406108X	1	treatment	Cas1	190226_IDG_54	72	518	0.450111	0.190687	0.228381	0.0354767	0.00221729	0.0931264	451	67	0	67	0.129344	200.243	35.7917	515.808	76.7692	0.12912	0.000223152	2	0.812649
54	E17	GW412617	1	treatment	Cas1	190226_IDG_53	72	593	0.470238	0.190476	0.204365	0.0357143	0	0.0992063	504	89	0	89	0.150084	200.243	35.7917	515.808	76.7692	0.12912	0.0209638	1	0.966358
54	E17	GW412617	1	treatment	Cas1	190226_IDG_54	72	594	0.467857	0.1375	0.180357	0.0125	0.107143	0.0857143	560	34	0	34	0.0572391	200.243	35.7917	515.808	76.7692	0.12912	-0.0718814	2	1.12414
23	D06	GW416981X	1	treatment	Cas1	190226_IDG_53	72	419	0.453782	0.145658	0.254902	0.0336134	0	0.112045	357	62	0	62	0.147971	200.243	35.7917	515.808	76.7692	0.12912	0.0188509	1	0.527402
23	D06	GW416981X	1	treatment	Cas1	190226_IDG_54	72	343	0.484211	0.150877	0.252632	0.0280702	0	0.0842105	285	58	0	58	0.169096	200.243	35.7917	515.808	76.7692	0.12912	0.0399757	2	0.295067
83	G06	GW429374	1	treatment	Cas1	190226_IDG_53	72	587	0.486034	0.182495	0.189944	0.0372439	0	0.104283	537	50	0	50	0.0851789	200.243	35.7917	515.808	76.7692	0.12912	-0.0439416	1	1.05987
83	G06	GW429374	1	treatment	Cas1	190226_IDG_54	72	544	0.414583	0.175	0.2375	0.05625	0.00625	0.110417	480	64	0	64	0.117647	200.243	35.7917	515.808	76.7692	0.12912	-0.0114734	2	0.897318
84	G07	GW429374A	1	treatment	Cas1	190226_IDG_53	72	569	0.502879	0.159309	0.232246	0.0345489	0	0.0710173	521	48	0	48	0.0843585	200.243	35.7917	515.808	76.7692	0.12912	-0.044762	1	1.01473
84	G07	GW429374A	1	treatment	Cas1	190226_IDG_54	72	513	0.493333	0.173333	0.22	0.0311111	0	0.0822222	450	63	0	63	0.122807	200.243	35.7917	515.808	76.7692	0.12912	-0.00631346	2	0.809704
162	K05	GW434756X	1	treatment	Cas1	190226_IDG_53	72	700	0.486134	0.199021	0.194127	0.0391517	0.00978793	0.0717781	613	87	0	87	0.124286	200.243	35.7917	515.808	76.7692	0.12912	-0.00483476	1	1.26961
162	K05	GW434756X	1	treatment	Cas1	190226_IDG_54	72	622	0.473198	0.144177	0.247689	0.0314233	0.00184843	0.101664	541	81	0	81	0.130225	200.243	35.7917	515.808	76.7692	0.12912	0.0011046	2	1.0711
216	M19	GW435821X	1	treatment	Cas1	190226_IDG_53	72	533	0.478814	0.199153	0.207627	0.0317797	0	0.0826271	472	61	0	61	0.114447	200.243	35.7917	515.808	76.7692	0.12912	-0.0146739	1	0.874101
216	M19	GW435821X	1	treatment	Cas1	190226_IDG_54	72	713	0.475962	0.165064	0.203526	0.0304487	0.00641026	0.11859	624	89	0	89	0.124825	200.243	35.7917	515.808	76.7692	0.12912	-0.00429579	2	1.29938
114	H17	GW440135	1	treatment	Cas1	190226_IDG_53	72	551	0.5054	0.149028	0.239741	0.0323974	0	0.0734341	463	88	0	88	0.15971	200.243	35.7917	515.808	76.7692	0.12912	0.0305891	1	0.847856
114	H17	GW440135	1	treatment	Cas1	190226_IDG_54	72	589	0.459677	0.185484	0.215726	0.0383065	0	0.100806	496	93	0	93	0.157895	200.243	35.7917	515.808	76.7692	0.12912	0.0287743	2	0.943444
85	G08	GW440146	1	treatment	Cas1	190226_IDG_53	72	574	0.464286	0.204365	0.230159	0.031746	0	0.0694444	504	70	0	70	0.121951	200.243	35.7917	515.808	76.7692	0.12912	-0.00716926	1	0.966358
85	G08	GW440146	1	treatment	Cas1	190226_IDG_54	72	492	0.498771	0.181818	0.176904	0.041769	0	0.100737	407	85	0	85	0.172764	200.243	35.7917	515.808	76.7692	0.12912	0.0436438	2	0.681337
115	H18	GW442130X	1	treatment	Cas1	190226_IDG_53	72	637	0.518116	0.139493	0.195652	0.0362319	0	0.110507	552	85	0	85	0.133438	200.243	35.7917	515.808	76.7692	0.12912	0.00431751	1	1.10186
115	H18	GW442130X	1	treatment	Cas1	190226_IDG_54	72	647	0.504655	0.167598	0.208566	0.0335196	0	0.0856611	537	110	0	110	0.170015	200.243	35.7917	515.808	76.7692	0.12912	0.040895	2	1.05987
53	E16	GW513184X	1	treatment	Cas1	190226_IDG_53	72	633	0.508227	0.155393	0.206581	0.0511883	0	0.0786106	547	86	0	86	0.135861	200.243	35.7917	515.808	76.7692	0.12912	0.0067405	1	1.0879
53	E16	GW513184X	1	treatment	Cas1	190226_IDG_54	72	675	0.449573	0.160684	0.251282	0.042735	0	0.0957265	585	90	0	90	0.133333	200.243	35.7917	515.808	76.7692	0.12912	0.00421286	2	1.1932
145	J08	GW525701	1	treatment	Cas1	190226_IDG_53	72	233	0.206061	0.0727273	0.339394	0.193939	0	0.187879	165	68	0	68	0.291845	200.243	35.7917	515.808	76.7692	0.12912	0.162725	1	-0.132215
145	J08	GW525701	1	treatment	Cas1	190226_IDG_54	72	292	0.212435	0.103627	0.279793	0.207254	0	0.196891	193	99	0	99	0.339041	200.243	35.7917	515.808	76.7692	0.12912	0.209921	2	-0.0266259
111	H14	GW560459	1	treatment	Cas1	190226_IDG_53	72	625	0.477231	0.134791	0.275046	0.0273224	0.00728597	0.0783242	549	76	0	76	0.1216	200.243	35.7917	515.808	76.7692	0.12912	-0.00752048	1	1.09349
111	H14	GW560459	1	treatment	Cas1	190226_IDG_54	72	675	0.494828	0.163793	0.191379	0.0310345	0	0.118966	580	95	0	95	0.140741	200.243	35.7917	515.808	76.7692	0.12912	0.0116203	2	1.17945
52	E15	GW569293E	1	treatment	Cas1	190226_IDG_53	72	670	0.522337	0.202749	0.171821	0.0292096	0	0.0738832	582	88	0	88	0.131343	200.243	35.7917	515.808	76.7692	0.12912	0.00222281	1	1.18495
52	E15	GW569293E	1	treatment	Cas1	190226_IDG_54	72	686	0.490598	0.158974	0.218803	0.042735	0.0034188	0.0854701	585	101	0	101	0.14723	200.243	35.7917	515.808	76.7692	0.12912	0.0181098	2	1.1932
27	D10	GW572399X	1	treatment	Cas1	190226_IDG_53	72	516	0.458797	0.180401	0.202673	0.0445434	0.00890869	0.104677	449	67	0	67	0.129845	200.243	35.7917	515.808	76.7692	0.12912	0.000724484	1	0.806757
27	D10	GW572399X	1	treatment	Cas1	190226_IDG_54	72	567	0.50101	0.169697	0.193939	0.0262626	0.0262626	0.0828283	495	72	0	72	0.126984	200.243	35.7917	515.808	76.7692	0.12912	-0.00213635	2	0.940573
199	L22	GW576924A	1	treatment	Cas1	190226_IDG_53	72	560	0.45122	0.168699	0.231707	0.0284553	0	0.119919	492	68	0	68	0.121429	200.243	35.7917	515.808	76.7692	0.12912	-0.00769191	1	0.93195
199	L22	GW576924A	1	treatment	Cas1	190226_IDG_54	72	628	0.508711	0.151568	0.207317	0.033101	0.010453	0.0888502	574	54	0	54	0.0859873	200.243	35.7917	515.808	76.7692	0.12912	-0.0431332	2	1.16291
230	N13	GW578748X	1	treatment	Cas1	190226_IDG_53	72	583	0.503922	0.147059	0.188235	0.0352941	0.00784314	0.117647	510	73	0	73	0.125214	200.243	35.7917	515.808	76.7692	0.12912	-0.00390607	1	0.983479
230	N13	GW578748X	1	treatment	Cas1	190226_IDG_54	72	639	0.481216	0.157424	0.221825	0.0429338	0.0250447	0.0715564	559	80	0	80	0.125196	200.243	35.7917	515.808	76.7692	0.12912	-0.00392486	2	1.12136
144	J07	GW580509X	1	treatment	Cas1	190226_IDG_53	72	501	0.549774	0.162896	0.167421	0.0361991	0.00226244	0.081448	442	59	0	59	0.117764	200.243	35.7917	515.808	76.7692	0.12912	-0.011356	1	0.786079
144	J07	GW580509X	1	treatment	Cas1	190226_IDG_54	72	628	0.498168	0.1337	0.238095	0.0457875	0.003663	0.0805861	546	82	0	82	0.130573	200.243	35.7917	515.808	76.7692	0.12912	0.00145277	2	1.0851
93	G16	GW621970X	1	treatment	Cas1	190226_IDG_53	72	542	0.460952	0.169524	0.173333	0.0247619	0.0914286	0.0742857	525	17	0	17	0.0313653	200.243	35.7917	515.808	76.7692	0.12912	-0.0977552	1	1.02605
93	G16	GW621970X	1	treatment	Cas1	190226_IDG_54	72	602	0.458042	0.129371	0.190559	0.034965	0.104895	0.0769231	572	30	0	30	0.0498339	200.243	35.7917	515.808	76.7692	0.12912	-0.0792866	2	1.15739
172	K15	GW632580X	1	treatment	Cas1	190226_IDG_53	72	692	0.487765	0.192496	0.19739	0.0326264	0.00815661	0.0815661	613	79	0	79	0.114162	200.243	35.7917	515.808	76.7692	0.12912	-0.0149586	1	1.26961
172	K15	GW632580X	1	treatment	Cas1	190226_IDG_54	72	630	0.504655	0.145251	0.221601	0.0335196	0.00372439	0.0912477	537	93	0	93	0.147619	200.243	35.7917	515.808	76.7692	0.12912	0.0184986	2	1.05987
202	M05	GW642138X	1	treatment	Cas1	190226_IDG_53	72	590	0.525	0.155769	0.209615	0.0442308	0	0.0653846	520	70	0	70	0.118644	200.243	35.7917	515.808	76.7692	0.12912	-0.0104764	1	1.0119
202	M05	GW642138X	1	treatment	Cas1	190226_IDG_54	72	607	0.49703	0.182178	0.192079	0.0772277	0	0.0514851	505	102	0	102	0.16804	200.243	35.7917	515.808	76.7692	0.12912	0.0389191	2	0.969215
174	K17	GW651576X	1	treatment	Cas1	190226_IDG_53	72	594	0.485549	0.192678	0.204239	0.0192678	0.00770713	0.0905588	519	75	0	75	0.126263	200.243	35.7917	515.808	76.7692	0.12912	-0.00285785	1	1.00906
174	K17	GW651576X	1	treatment	Cas1	190226_IDG_54	72	706	0.5	0.160256	0.198718	0.0416667	0.00320513	0.0961538	624	82	0	82	0.116147	200.243	35.7917	515.808	76.7692	0.12912	-0.0129732	2	1.29938
203	M06	GW683134A	1	treatment	Cas1	190226_IDG_53	72	612	0.491682	0.194085	0.155268	0.0443623	0.00554529	0.109057	541	71	0	71	0.116013	200.243	35.7917	515.808	76.7692	0.12912	-0.0131074	1	1.0711
203	M06	GW683134A	1	treatment	Cas1	190226_IDG_54	72	655	0.418944	0.20765	0.216758	0.0382514	0	0.118397	549	106	0	106	0.161832	200.243	35.7917	515.808	76.7692	0.12912	0.0327116	2	1.09349
201	M04	GW684088	1	treatment	Cas1	190226_IDG_53	72	505	0.422274	0.171694	0.301624	0.0301624	0	0.0742459	431	74	0	74	0.146535	200.243	35.7917	515.808	76.7692	0.12912	0.0174142	1	0.753408
201	M04	GW684088	1	treatment	Cas1	190226_IDG_54	72	572	0.467742	0.179435	0.197581	0.0302419	0	0.125	496	76	0	76	0.132867	200.243	35.7917	515.808	76.7692	0.12912	0.00374666	2	0.943444
226	N09	GW693917A	1	treatment	Cas1	190226_IDG_53	72	582	0.454191	0.231969	0.161793	0.0331384	0	0.118908	513	69	0	69	0.118557	200.243	35.7917	515.808	76.7692	0.12912	-0.0105638	1	0.992019
226	N09	GW693917A	1	treatment	Cas1	190226_IDG_54	72	645	0.425182	0.171533	0.25365	0.0273723	0.00912409	0.113139	548	97	0	97	0.150388	200.243	35.7917	515.808	76.7692	0.12912	0.0212671	2	1.0907
221	N04	GW709042A	1	treatment	Cas1	190226_IDG_53	72	646	0.432384	0.170819	0.247331	0.0355872	0	0.113879	562	84	0	84	0.130031	200.243	35.7917	515.808	76.7692	0.12912	0.000910483	1	1.12969
221	N04	GW709042A	1	treatment	Cas1	190226_IDG_54	72	652	0.428832	0.220803	0.20438	0.0328467	0	0.113139	548	104	0	104	0.159509	200.243	35.7917	515.808	76.7692	0.12912	0.0303887	2	1.0907
229	N12	GW770249X	1	treatment	Cas1	190226_IDG_53	72	478	0.517677	0.136364	0.219697	0.0252525	0.020202	0.0808081	396	82	0	82	0.171548	200.243	35.7917	515.808	76.7692	0.12912	0.0424276	1	0.647927
229	N12	GW770249X	1	treatment	Cas1	190226_IDG_54	72	637	0.514925	0.134328	0.220149	0.0485075	0	0.0820896	536	101	0	101	0.158556	200.243	35.7917	515.808	76.7692	0.12912	0.0294353	2	1.05706
143	J06	GW780159X	1	treatment	Cas1	190226_IDG_53	72	408	0.494764	0.0837696	0.251309	0.0366492	0.013089	0.120419	382	26	0	26	0.0637255	200.243	35.7917	515.808	76.7692	0.12912	-0.065395	1	0.605044
143	J06	GW780159X	1	treatment	Cas1	190226_IDG_54	72	464	0.498771	0.0589681	0.226044	0.041769	0.002457	0.17199	407	57	0	57	0.122845	200.243	35.7917	515.808	76.7692	0.12912	-0.00627565	2	0.681337
141	J04	GW784752X	1	treatment	Cas1	190226_IDG_53	72	543	0.457516	0.156863	0.270153	0.0348584	0	0.08061	459	84	0	84	0.154696	200.243	35.7917	515.808	76.7692	0.12912	0.0255757	1	0.836148
141	J04	GW784752X	1	treatment	Cas1	190226_IDG_54	72	523	0.443662	0.164319	0.234742	0.0352113	0	0.122066	426	97	0	97	0.185468	200.243	35.7917	515.808	76.7692	0.12912	0.056348	2	0.738484
198	L21	GW792479	1	treatment	Cas1	190226_IDG_53	72	523	0.473002	0.174946	0.211663	0.0367171	0	0.103672	463	60	0	60	0.114723	200.243	35.7917	515.808	76.7692	0.12912	-0.0143977	1	0.847856
198	L21	GW792479	1	treatment	Cas1	190226_IDG_54	72	518	0.44086	0.139785	0.262366	0.027957	0.0193548	0.109677	465	53	0	53	0.102317	200.243	35.7917	515.808	76.7692	0.12912	-0.0268039	2	0.8537
227	N10	GW807982X	1	treatment	Cas1	190226_IDG_53	72	638	0.471119	0.16065	0.196751	0.0361011	0	0.135379	554	84	0	84	0.131661	200.243	35.7917	515.808	76.7692	0.12912	0.00254096	1	1.10744
227	N10	GW807982X	1	treatment	Cas1	190226_IDG_54	72	678	0.415358	0.172775	0.265271	0.04363	0	0.102967	573	105	0	105	0.154867	200.243	35.7917	515.808	76.7692	0.12912	0.0257468	2	1.16015
25	D08	GW810372X	1	treatment	Cas1	190226_IDG_53	72	483	0.477723	0.183168	0.217822	0.0470297	0	0.0742574	404	79	0	79	0.163561	200.243	35.7917	515.808	76.7692	0.12912	0.0344406	1	0.67225
25	D08	GW810372X	1	treatment	Cas1	190226_IDG_54	72	617	0.542214	0.174484	0.172608	0.0318949	0	0.0787992	533	84	0	84	0.136143	200.243	35.7917	515.808	76.7692	0.12912	0.00702215	2	1.04862
132	I15	GW811761X	1	treatment	Cas1	190226_IDG_53	72	588	0.552894	0.159681	0.175649	0.0359281	0	0.0758483	501	87	0	87	0.147959	200.243	35.7917	515.808	76.7692	0.12912	0.0188387	1	0.957776
132	I15	GW811761X	1	treatment	Cas1	190226_IDG_54	72	639	0.456053	0.139303	0.162521	0.0348259	0.119403	0.0729685	603	36	0	36	0.056338	200.243	35.7917	515.808	76.7692	0.12912	-0.0727824	2	1.24243
161	K04	GW814408X	1	treatment	Cas1	190226_IDG_53	72										0	0		200.243	35.7917	515.808	76.7692	0.12912
161	K04	GW814408X	1	treatment	Cas1	190226_IDG_54	72	531	0.437788	0.14977	0.239631	0.062212	0	0.110599	434	97	0	97	0.182674	200.243	35.7917	515.808	76.7692	0.12912	0.0535537	1	0.76234
166	K09	GW830263A	1	treatment	Cas1	190226_IDG_53	72	673	0.509532	0.154246	0.204506	0.0277296	0.0259965	0.0779896	577	96	0	96	0.142645	200.243	35.7917	515.808	76.7692	0.12912	0.0135244	1	1.17118
166	K09	GW830263A	1	treatment	Cas1	190226_IDG_54	72	525	0.5	0.147982	0.246637	0.0313901	0	0.073991	446	79	0	79	0.150476	200.243	35.7917	515.808	76.7692	0.12912	0.0213557	2	0.797906
233	N16	GW830900A	1	treatment	Cas1	190226_IDG_53	72	607	0.483932	0.162571	0.20794	0.0245747	0.0189036	0.102079	529	78	0	78	0.128501	200.243	35.7917	515.808	76.7692	0.12912	-0.000619653	1	1.03734
233	N16	GW830900A	1	treatment	Cas1	190226_IDG_54	72	571	0.463115	0.184426	0.204918	0.0327869	0	0.114754	488	83	0	83	0.145359	200.243	35.7917	515.808	76.7692	0.12912	0.0162385	2	0.920432
238	N21	GW832467	1	treatment	Cas1	190226_IDG_53	72	537	0.510504	0.17437	0.19958	0.0315126	0.00420168	0.0798319	476	61	0	61	0.113594	200.243	35.7917	515.808	76.7692	0.12912	-0.0155264	1	0.885723
238	N21	GW832467	1	treatment	Cas1	190226_IDG_54	72	602	0.467557	0.162214	0.23855	0.0438931	0.0209924	0.0667939	524	78	0	78	0.129568	200.243	35.7917	515.808	76.7692	0.12912	0.000447629	2	1.02322
51	E14	GW855857	1	treatment	Cas1	190226_IDG_53	72	412	0.478836	0.0343915	0.224868	0.047619	0	0.214286	378	34	0	34	0.0825243	200.243	35.7917	515.808	76.7692	0.12912	-0.0465962	1	0.592715
51	E14	GW855857	1	treatment	Cas1	190226_IDG_54	72	393	0.432507	0.0495868	0.283747	0.0413223	0	0.192837	363	30	0	30	0.0763359	200.243	35.7917	515.808	76.7692	0.12912	-0.0527846	2	0.546165
20	D03	GW867253	1	treatment	Cas1	190226_IDG_53	72	513	0.477958	0.160093	0.232019	0.0348028	0	0.0951276	431	82	0	82	0.159844	200.243	35.7917	515.808	76.7692	0.12912	0.0307236	1	0.753408
20	D03	GW867253	1	treatment	Cas1	190226_IDG_54	72	555	0.506579	0.164474	0.245614	0.0263158	0	0.0570175	456	99	0	99	0.178378	200.243	35.7917	515.808	76.7692	0.12912	0.0492579	2	0.827349
24	D07	GW868318	1	treatment	Cas1	190226_IDG_53	72	537	0.40592	0.238901	0.226216	0.0295983	0.00634249	0.0930233	473	64	0	64	0.119181	200.243	35.7917	515.808	76.7692	0.12912	-0.00993984	1	0.877009
24	D07	GW868318	1	treatment	Cas1	190226_IDG_54	72	664	0.549372	0.136445	0.211849	0.043088	0	0.059246	557	107	0	107	0.161145	200.243	35.7917	515.808	76.7692	0.12912	0.0320241	2	1.11579
48	E11	HG-10-102-01	1	treatment	Cas1	190226_IDG_53	72	641	0.430851	0.171986	0.230496	0.0496454	0.0265957	0.0904255	564	77	0	77	0.120125	200.243	35.7917	515.808	76.7692	0.12912	-0.00899567	1	1.13524
48	E11	HG-10-102-01	1	treatment	Cas1	190226_IDG_54	72	641	0.463415	0.16899	0.24216	0.0365854	0.00696864	0.0818815	574	67	0	67	0.104524	200.243	35.7917	515.808	76.7692	0.12912	-0.0245963	2	1.16291
88	G11	HTH-01-015	1	treatment	Cas1	190226_IDG_53	72	642	0.492119	0.155867	0.231173	0.0315236	0.00175131	0.0875657	571	71	0	71	0.110592	200.243	35.7917	515.808	76.7692	0.12912	-0.0185286	1	1.15462
88	G11	HTH-01-015	1	treatment	Cas1	190226_IDG_54	72	659	0.46875	0.170139	0.260417	0.0295139	0.00347222	0.0677083	576	83	0	83	0.125948	200.243	35.7917	515.808	76.7692	0.12912	-0.00317207	2	1.16843
107	H10	JH-II-127	1	treatment	Cas1	190226_IDG_53	72	499	0.535714	0.130102	0.183673	0.0637755	0	0.0867347	392	107	0	107	0.214429	200.243	35.7917	515.808	76.7692	0.12912	0.0853084	1	0.635717
107	H10	JH-II-127	1	treatment	Cas1	190226_IDG_54	72	526	0.493088	0.163594	0.237327	0.0368664	0.00460829	0.0645161	434	92	0	92	0.174905	200.243	35.7917	515.808	76.7692	0.12912	0.0457845	2	0.76234
7	C10	JNK-IN-7	1	treatment	Cas1	190226_IDG_53	72	553	0.568627	0	0.301961	0.054902	0.00980392	0.0647059	510	43	0	43	0.0777577	200.243	35.7917	515.808	76.7692	0.12912	-0.0513628	1	0.983479
7	C10	JNK-IN-7	1	treatment	Cas1	190226_IDG_54	72	499	0.531111	0	0.3	0.0866667	0.00222222	0.08	450	49	0	49	0.0981964	200.243	35.7917	515.808	76.7692	0.12912	-0.0309241	2	0.809704
188	L11	K05908	1	treatment	Cas1	190226_IDG_53	72	560	0.535573	0.106719	0.215415	0.027668	0.00592885	0.108696	506	54	0	54	0.0964286	200.243	35.7917	515.808	76.7692	0.12912	-0.0326919	1	0.972071
188	L11	K05908	1	treatment	Cas1	190226_IDG_54	72	599	0.549165	0.137291	0.213358	0.0333952	0.00185529	0.0649351	539	60	0	60	0.100167	200.243	35.7917	515.808	76.7692	0.12912	-0.0289535	2	1.06549
36	D19	NVP-2	1	treatment	Cas1	190226_IDG_53	72	552	0.492958	0.138833	0.231388	0.0402414	0.00603622	0.0905433	497	55	0	55	0.0996377	200.243	35.7917	515.808	76.7692	0.12912	-0.0294828	1	0.946314
36	D19	NVP-2	1	treatment	Cas1	190226_IDG_54	72	584	0.459302	0.187984	0.21124	0.0329457	0.00193798	0.106589	516	68	0	68	0.116438	200.243	35.7917	515.808	76.7692	0.12912	-0.0126821	2	1.00055
87	G10	NVS-PAK1-1	1	treatment	Cas1	190226_IDG_53	72	595	0.498031	0.175197	0.190945	0.023622	0	0.112205	508	87	0	87	0.146218	200.243	35.7917	515.808	76.7692	0.12912	0.017098	1	0.977778
87	G10	NVS-PAK1-1	1	treatment	Cas1	190226_IDG_54	72	619	0.507435	0.113383	0.232342	0.0501859	0.00557621	0.0910781	538	81	0	81	0.130856	200.243	35.7917	515.808	76.7692	0.12912	0.00173574	2	1.06268
3	C06	PFE-PKIS 1	1	treatment	Cas1	190226_IDG_53	72	553	0.477083	0.177083	0.216667	0.0291667	0	0.1	480	73	0	73	0.132007	200.243	35.7917	515.808	76.7692	0.12912	0.00288676	1	0.897318
3	C06	PFE-PKIS 1	1	treatment	Cas1	190226_IDG_54	72	509	0.495238	0.164286	0.221429	0.0309524	0	0.0880952	420	89	0	89	0.174853	200.243	35.7917	515.808	76.7692	0.12912	0.0457322	2	0.720513
43	E06	PFE-PKIS 12	1	treatment	Cas1	190226_IDG_53	72	535	0.472689	0.170168	0.22479	0.0315126	0.0147059	0.0861345	476	59	0	59	0.11028	200.243	35.7917	515.808	76.7692	0.12912	-0.0188401	1	0.885723
43	E06	PFE-PKIS 12	1	treatment	Cas1	190226_IDG_54	72	524	0.484848	0.162338	0.233766	0.0238095	0.004329	0.0909091	462	62	0	62	0.118321	200.243	35.7917	515.808	76.7692	0.12912	-0.0107999	2	0.844932
44	E07	PFE-PKIS 21 (PD 0325901)	1	treatment	Cas1	190226_IDG_53	72	399	0.60597	0.0686567	0.223881	0.0597015	0	0.041791	335	64	0	64	0.160401	200.243	35.7917	515.808	76.7692	0.12912	0.0312805	1	0.457866
44	E07	PFE-PKIS 21 (PD 0325901)	1	treatment	Cas1	190226_IDG_54	72	363	0.583893	0.120805	0.224832	0.0167785	0	0.0536913	298	65	0	65	0.179063	200.243	35.7917	515.808	76.7692	0.12912	0.0499429	2	0.338083
128	I11	PFE-PKIS 25	1	treatment	Cas1	190226_IDG_53	72	639	0.469203	0.224638	0.179348	0.0307971	0	0.0960145	552	87	0	87	0.13615	200.243	35.7917	515.808	76.7692	0.12912	0.00702976	1	1.10186
128	I11	PFE-PKIS 25	1	treatment	Cas1	190226_IDG_54	72	678	0.50423	0.160745	0.199662	0.0389171	0	0.0964467	591	87	0	87	0.128319	200.243	35.7917	515.808	76.7692	0.12912	-0.000801893	2	1.20965
237	N20	PFE-PKIS 29	1	treatment	Cas1	190226_IDG_53	72	318	0.654008	0.0506329	0.240506	0.0337553	0	0.021097	237	81	0	81	0.254717	200.243	35.7917	515.808	76.7692	0.12912	0.125597	1	0.131403
237	N20	PFE-PKIS 29	1	treatment	Cas1	190226_IDG_54	72	342	0.72314	0.0495868	0.157025	0.0413223	0	0.0289256	242	100	0	100	0.292398	200.243	35.7917	515.808	76.7692	0.12912	0.163277	2	0.148839
214	M17	PFE-PKIS 3	1	treatment	Cas1	190226_IDG_53	72	468	0.609756	0.1	0.17561	0.0365854	0.0170732	0.0609756	410	58	0	58	0.123932	200.243	35.7917	515.808	76.7692	0.12912	-0.00518885	1	0.690407
214	M17	PFE-PKIS 3	1	treatment	Cas1	190226_IDG_54	72	459	0.613466	0.122195	0.162095	0.0374065	0	0.0648379	401	58	0	58	0.126362	200.243	35.7917	515.808	76.7692	0.12912	-0.00275882	2	0.663144
189	L12	PFE-PKIS 32	1	treatment	Cas1	190226_IDG_53	72	417	0.587912	0.0824176	0.217033	0.0604396	0.00824176	0.043956	364	53	0	53	0.127098	200.243	35.7917	515.808	76.7692	0.12912	-0.00202216	1	0.549284
189	L12	PFE-PKIS 32	1	treatment	Cas1	190226_IDG_54	72	403	0.577904	0.104816	0.203966	0.0594901	0.0169972	0.0368272	353	50	0	50	0.124069	200.243	35.7917	515.808	76.7692	0.12912	-0.005051	2	0.514846
131	I14	PFE-PKIS 34	1	treatment	Cas1	190226_IDG_53	72	695	0.536752	0.140171	0.206838	0.042735	0	0.0735043	585	110	0	110	0.158273	200.243	35.7917	515.808	76.7692	0.12912	0.0291529	1	1.1932
131	I14	PFE-PKIS 34	1	treatment	Cas1	190226_IDG_54	72	621	0.475191	0.173664	0.227099	0.0362595	0	0.0877863	524	97	0	97	0.1562	200.243	35.7917	515.808	76.7692	0.12912	0.0270792	2	1.02322
10	C13	PFE-PKIS 39	1	treatment	Cas1	190226_IDG_53	72	535	0.458947	0.132632	0.231579	0.0231579	0.0147368	0.138947	475	60	0	60	0.11215	200.243	35.7917	515.808	76.7692	0.12912	-0.0169709	1	0.88282
10	C13	PFE-PKIS 39	1	treatment	Cas1	190226_IDG_54	72	573	0.553571	0.162698	0.172619	0.0138889	0	0.0972222	504	69	0	69	0.120419	200.243	35.7917	515.808	76.7692	0.12912	-0.00870163	2	0.966358
41	E04	PFE-PKIS 40	1	treatment	Cas1	190226_IDG_53	72	314	0.613281	0.0625	0.21875	0.0703125	0.0117188	0.0234375	256	58	0	58	0.184713	200.243	35.7917	515.808	76.7692	0.12912	0.0555929	1	0.197158
41	E04	PFE-PKIS 40	1	treatment	Cas1	190226_IDG_54	72	293	0.688679	0.0849057	0.179245	0.0283019	0	0.0188679	212	81	0	81	0.276451	200.243	35.7917	515.808	76.7692	0.12912	0.14733	2	0.0426831
109	H12	PFE-PKIS 41	1	treatment	Cas1	190226_IDG_53	72	552	0.491189	0.169604	0.196035	0.0462555	0	0.0969163	454	98	0	98	0.177536	200.243	35.7917	515.808	76.7692	0.12912	0.0484158	1	0.821474
109	H12	PFE-PKIS 41	1	treatment	Cas1	190226_IDG_54	72	620	0.498168	0.179487	0.205128	0.040293	0	0.0769231	546	74	0	74	0.119355	200.243	35.7917	515.808	76.7692	0.12912	-0.00976564	2	1.0851
70	F13	PFE-PKIS 44	1	treatment	Cas1	190226_IDG_53	72	426	0.565826	0.128852	0.201681	0.0364146	0.00280112	0.0644258	357	69	0	69	0.161972	200.243	35.7917	515.808	76.7692	0.12912	0.0328514	1	0.527402
70	F13	PFE-PKIS 44	1	treatment	Cas1	190226_IDG_54	72	446	0.511335	0.118388	0.24937	0.0352645	0.0125945	0.0730479	397	49	0	49	0.109865	200.243	35.7917	515.808	76.7692	0.12912	-0.019255	2	0.650975
76	F19	SB-216385	1	treatment	Cas1	190226_IDG_53	72	562	0.5	0.197917	0.2125	0.025	0	0.0645833	480	82	0	82	0.145907	200.243	35.7917	515.808	76.7692	0.12912	0.016787	1	0.897318
76	F19	SB-216385	1	treatment	Cas1	190226_IDG_54	72	685	0.478411	0.198618	0.214162	0.0310881	0	0.0777202	579	106	0	106	0.154745	200.243	35.7917	515.808	76.7692	0.12912	0.025624	2	1.17669
92	G15	SB-219980	1	treatment	Cas1	190226_IDG_53	72	693	0.412747	0.165402	0.177542	0.0227618	0.151745	0.060698	659	34	0	34	0.049062	200.243	35.7917	515.808	76.7692	0.12912	-0.0800584	1	1.39316
92	G15	SB-219980	1	treatment	Cas1	190226_IDG_54	72	602	0.43578	0.380734	0.087156	0.0366972	0.0137615	0.0458716	218	384	0	384	0.637874	200.243	35.7917	515.808	76.7692	0.12912	0.508753	2	0.0642199
223	N06	SB-242719	1	treatment	Cas1	190226_IDG_53	72	590	0.405039	0.174419	0.27907	0.0348837	0.00581395	0.100775	516	74	0	74	0.125424	200.243	35.7917	515.808	76.7692	0.12912	-0.00369675	1	1.00055
223	N06	SB-242719	1	treatment	Cas1	190226_IDG_54	72	643	0.451056	0.184261	0.228407	0.0364683	0	0.0998081	521	122	0	122	0.189736	200.243	35.7917	515.808	76.7692	0.12912	0.0606151	2	1.01473
147	J10	SB-282975	1	treatment	Cas1	190226_IDG_53	72	638	0.479204	0.186257	0.218807	0.0361664	0.00180832	0.0777577	553	85	0	85	0.133229	200.243	35.7917	515.808	76.7692	0.12912	0.00410836	1	1.10465
147	J10	SB-282975	1	treatment	Cas1	190226_IDG_54	72	620	0.465291	0.153846	0.268293	0.0393996	0	0.0731707	533	87	0	87	0.140323	200.243	35.7917	515.808	76.7692	0.12912	0.0112021	2	1.04862
194	L17	SB-517081	1	treatment	Cas1	190226_IDG_53	72	506	0.408207	0.218143	0.218143	0.0367171	0.00863931	0.110151	463	43	0	43	0.0849802	200.243	35.7917	515.808	76.7692	0.12912	-0.0441402	1	0.847856
194	L17	SB-517081	1	treatment	Cas1	190226_IDG_54	72	571	0.458078	0.143149	0.271984	0.0388548	0.00613497	0.0817996	489	82	0	82	0.143608	200.243	35.7917	515.808	76.7692	0.12912	0.0144872	2	0.923314
57	E20	SB-590885	1	treatment	Cas1	190226_IDG_53	72	638	0.447458	0.205085	0.211864	0.020339	0	0.115254	590	48	0	48	0.0752351	200.243	35.7917	515.808	76.7692	0.12912	-0.0538854	1	1.20691
57	E20	SB-590885	1	treatment	Cas1	190226_IDG_54	72	636	0.484346	0.191529	0.180479	0.0349908	0	0.108656	543	93	0	93	0.146226	200.243	35.7917	515.808	76.7692	0.12912	0.0171059	2	1.0767
140	J03	SB-633825	1	treatment	Cas1	190226_IDG_53	72	495	0.487356	0.167816	0.211494	0.0413793	0.0045977	0.0873563	435	60	0	60	0.121212	200.243	35.7917	515.808	76.7692	0.12912	-0.00790836	1	0.765314
140	J03	SB-633825	1	treatment	Cas1	190226_IDG_54	72	562	0.539877	0.157464	0.216769	0.0224949	0	0.0633947	489	73	0	73	0.129893	200.243	35.7917	515.808	76.7692	0.12912	0.000772761	2	0.923314
138	I21	SB-693162/GW549034	1	treatment	Cas1	190226_IDG_53	72	555	0.524008	0.139875	0.192067	0.0292276	0	0.114823	479	76	0	76	0.136937	200.243	35.7917	515.808	76.7692	0.12912	0.00781646	1	0.894422
138	I21	SB-693162/GW549034	1	treatment	Cas1	190226_IDG_54	72	748	0.369822	0.150888	0.218935	0.0473373	0.0399408	0.173077	676	72	0	72	0.0962567	200.243	35.7917	515.808	76.7692	0.12912	-0.0328638	2	1.43823
137	I20	SB-708998	1	treatment	Cas1	190226_IDG_53	72	616	0.496212	0.17803	0.214015	0.032197	0.00189394	0.0776515	528	88	0	88	0.142857	200.243	35.7917	515.808	76.7692	0.12912	0.0137367	1	1.03452
137	I20	SB-708998	1	treatment	Cas1	190226_IDG_54	72	646	0.508079	0.157989	0.217235	0.02693	0	0.0897666	557	89	0	89	0.137771	200.243	35.7917	515.808	76.7692	0.12912	0.00865042	2	1.11579
222	N05	SB-710397	1	treatment	Cas1	190226_IDG_53	72	588	0.496032	0.166667	0.230159	0.0396825	0	0.0674603	504	84	0	84	0.142857	200.243	35.7917	515.808	76.7692	0.12912	0.0137367	1	0.966358
222	N05	SB-710397	1	treatment	Cas1	190226_IDG_54	72	643	0.561372	0.144404	0.200361	0.0252708	0	0.0685921	554	89	0	89	0.138414	200.243	35.7917	515.808	76.7692	0.12912	0.00929321	2	1.10744
32	D15	SB-725317	1	treatment	Cas1	190226_IDG_53	72	430	0.527439	0.097561	0.195122	0.070122	0	0.109756	328	102	0	102	0.237209	200.243	35.7917	515.808	76.7692	0.12912	0.108089	1	0.435487
32	D15	SB-725317	1	treatment	Cas1	190226_IDG_54	72	532	0.534653	0.0940594	0.252475	0.0544554	0	0.0643564	404	128	0	128	0.240602	200.243	35.7917	515.808	76.7692	0.12912	0.111481	2	0.67225
225	N08	SB-732932	1	treatment	Cas1	190226_IDG_53	72	526	0.411111	0.184444	0.264444	0.0355556	0.00888889	0.0955556	450	76	0	76	0.144487	200.243	35.7917	515.808	76.7692	0.12912	0.0153662	1	0.809704
225	N08	SB-732932	1	treatment	Cas1	190226_IDG_54	72	569	0.35687	0.21374	0.175573	0.0114504	0.15458	0.0820611	524	45	0	45	0.0790861	200.243	35.7917	515.808	76.7692	0.12912	-0.0500344	2	1.02322
196	L19	SB-733894	1	treatment	Cas1	190226_IDG_53	72	670	0.424658	0.22089	0.210616	0.0376712	0.015411	0.0907534	584	86	0	86	0.128358	200.243	35.7917	515.808	76.7692	0.12912	-0.000762268	1	1.19045
196	L19	SB-733894	1	treatment	Cas1	190226_IDG_54	72	598	0.50099	0.229703	0.178218	0.0316832	0.0039604	0.0554455	505	93	0	93	0.155518	200.243	35.7917	515.808	76.7692	0.12912	0.0263979	2	0.969215
148	J11	SB-735464	1	treatment	Cas1	190226_IDG_53	72	546	0.485777	0.161926	0.227571	0.0525164	0	0.0722101	457	89	0	89	0.163004	200.243	35.7917	515.808	76.7692	0.12912	0.0338832	1	0.830284
148	J11	SB-735464	1	treatment	Cas1	190226_IDG_54	72	610	0.494275	0.173664	0.219466	0.0362595	0.00572519	0.0706107	524	86	0	86	0.140984	200.243	35.7917	515.808	76.7692	0.12912	0.0118631	2	1.02322
175	K18	SB-742609	1	treatment	Cas1	190226_IDG_53	72	699	0.504886	0.167752	0.221498	0.0228013	0.019544	0.0635179	614	85	0	85	0.121602	200.243	35.7917	515.808	76.7692	0.12912	-0.00751819	1	1.27232
175	K18	SB-742609	1	treatment	Cas1	190226_IDG_54	72	598	0.483495	0.182524	0.203883	0.0349515	0	0.0951456	515	83	0	83	0.138796	200.243	35.7917	515.808	76.7692	0.12912	0.00967551	2	0.997705
67	F10	SB-747651A	1	treatment	Cas1	190226_IDG_53	72	561	0.55814	0.176357	0.184109	0.0174419	0.00193798	0.0620155	516	45	0	45	0.0802139	200.243	35.7917	515.808	76.7692	0.12912	-0.0489066	1	1.00055
67	F10	SB-747651A	1	treatment	Cas1	190226_IDG_54	72	547	0.532389	0.168016	0.204453	0.0202429	0.00607287	0.0688259	494	53	0	53	0.0968921	200.243	35.7917	515.808	76.7692	0.12912	-0.0322283	2	0.9377
236	N19	SB-772077-B	1	treatment	Cas1	190226_IDG_53	72	475	0.5	0.171362	0.230047	0.028169	0	0.0704225	426	49	0	49	0.103158	200.243	35.7917	515.808	76.7692	0.12912	-0.0259626	1	0.738484
236	N19	SB-772077-B	1	treatment	Cas1	190226_IDG_54	72	512	0.570806	0.12854	0.198257	0.0283224	0	0.0740741	459	53	0	53	0.103516	200.243	35.7917	515.808	76.7692	0.12912	-0.0256049	2	0.836148
152	J15	TH257	1	treatment	Cas1	190226_IDG_53	72	719	0.462036	0.156704	0.231018	0.0436187	0	0.106624	619	100	0	100	0.139082	200.243	35.7917	515.808	76.7692	0.12912	0.00996158	1	1.28586
152	J15	TH257	1	treatment	Cas1	190226_IDG_54	72	688	0.523973	0.136986	0.208904	0.0393836	0	0.0907534	584	104	0	104	0.151163	200.243	35.7917	515.808	76.7692	0.12912	0.0220423	2	1.19045
204	M07	THZ1	1	treatment	Cas1	190226_IDG_53	72	117	0.34375	0.046875	0.4375	0.09375	0	0.078125	64	53	0	53	0.452991	200.243	35.7917	515.808	76.7692	0.12912	0.323871	1	-0.56638
204	M07	THZ1	1	treatment	Cas1	190226_IDG_54	72	127	0.54023	0	0.390805	0.0344828	0	0.0344828	87	40	0	40	0.314961	200.243	35.7917	515.808	76.7692	0.12912	0.18584	2	-0.457015
151	J14	THZ531	1	treatment	Cas1	190226_IDG_53	72	252	0.482955	0	0.340909	0.0397727	0	0.136364	176	76	0	76	0.301587	200.243	35.7917	515.808	76.7692	0.12912	0.172467	1	-0.0902022
151	J14	THZ531	1	treatment	Cas1	190226_IDG_54	72	248	0.417476	0.0873786	0.23301	0.0631068	0.145631	0.0533981	206	42	0	42	0.169355	200.243	35.7917	515.808	76.7692	0.12912	0.0402344	2	0.0209827
167	K10	TPKI-100	1	treatment	Cas1	190226_IDG_53	72	523	0.437908	0.178649	0.235294	0.0501089	0.0196078	0.0784314	459	64	0	64	0.122371	200.243	35.7917	515.808	76.7692	0.12912	-0.00674954	1	0.836148
167	K10	TPKI-100	1	treatment	Cas1	190226_IDG_54	72	611	0.456562	0.22366	0.192237	0.0443623	0.0166359	0.0665434	541	70	0	70	0.114566	200.243	35.7917	515.808	76.7692	0.12912	-0.0145542	2	1.0711
136	I19	TPKI-105	1	treatment	Cas1	190226_IDG_53	72	576	0.474903	0.185328	0.200772	0.027027	0.0135135	0.0984556	518	58	0	58	0.100694	200.243	35.7917	515.808	76.7692	0.12912	-0.028426	1	1.00622
136	I19	TPKI-105	1	treatment	Cas1	190226_IDG_54	72	574	0.521127	0.15493	0.2334	0.0342052	0	0.056338	497	77	0	77	0.134146	200.243	35.7917	515.808	76.7692	0.12912	0.00502586	2	0.946314
195	L18	TPKI-106	1	treatment	Cas1	190226_IDG_53	72	648	0.440767	0.200348	0.231707	0.0226481	0.0121951	0.0923345	574	74	0	74	0.114198	200.243	35.7917	515.808	76.7692	0.12912	-0.0149229	1	1.16291
195	L18	TPKI-106	1	treatment	Cas1	190226_IDG_54	72	672	0.507719	0.168096	0.205832	0.0325901	0.00686106	0.0789022	583	89	0	89	0.13244	200.243	35.7917	515.808	76.7692	0.12912	0.00332	2	1.1877
234	N17	TPKI-16	1	treatment	Cas1	190226_IDG_53	72	398	0.593939	0.0757576	0.245455	0.0424242	0.00909091	0.0333333	330	68	0	68	0.170854	200.243	35.7917	515.808	76.7692	0.12912	0.0417338	1	0.441894
234	N17	TPKI-16	1	treatment	Cas1	190226_IDG_54	72	398	0.70347	0.0536278	0.160883	0.0473186	0	0.0347003	317	81	0	81	0.203518	200.243	35.7917	515.808	76.7692	0.12912	0.0743971	2	0.400061
232	N15	TPKI-24	1	treatment	Cas1	190226_IDG_53	72	422	0.448454	0.0206186	0.283505	0.0824742	0	0.164948	194	228	0	228	0.540284	200.243	35.7917	515.808	76.7692	0.12912	0.411164	1	-0.0229339
232	N15	TPKI-24	1	treatment	Cas1	190226_IDG_54	72	407	0.25641	0.0871795	0.333333	0.184615	0	0.138462	195	212	0	212	0.520885	200.243	35.7917	515.808	76.7692	0.12912	0.391764	2	-0.0192469
168	K11	TPKI-26	1	treatment	Cas1	190226_IDG_53	72	485	0.269406	0.0776256	0.328767	0.205479	0	0.118721	219	266	0	266	0.548454	200.243	35.7917	515.808	76.7692	0.12912	0.419333	1	0.0677939
168	K11	TPKI-26	1	treatment	Cas1	190226_IDG_54	72	481	0.399083	0.0412844	0.243119	0.155963	0	0.16055	218	263	0	263	0.546778	200.243	35.7917	515.808	76.7692	0.12912	0.417657	2	0.0642199
149	J12	TPKI-39	1	treatment	Cas1	190226_IDG_53	72	559	0.446281	0.167355	0.252066	0.035124	0.00206612	0.0971074	484	75	0	75	0.134168	200.243	35.7917	515.808	76.7692	0.12912	0.00504768	1	0.908888
149	J12	TPKI-39	1	treatment	Cas1	190226_IDG_54	72	616	0.466292	0.183521	0.224719	0.0411985	0.00561798	0.0786517	534	82	0	82	0.133117	200.243	35.7917	515.808	76.7692	0.12912	0.00399641	2	1.05143
176	K19	TPKI-58	1	treatment	Cas1	190226_IDG_53	72	596	0.436673	0.198488	0.245747	0.0321361	0	0.0869565	529	67	0	67	0.112416	200.243	35.7917	515.808	76.7692	0.12912	-0.0167044	1	1.03734
176	K19	TPKI-58	1	treatment	Cas1	190226_IDG_54	72	730	0.516484	0.149137	0.213501	0.0376766	0.00470958	0.0784929	637	93	0	93	0.127397	200.243	35.7917	515.808	76.7692	0.12912	-0.00172322	2	1.33437
150	J13	TPKI-69	1	treatment	Cas1	190226_IDG_53	72	586	0.529293	0.163636	0.185859	0.040404	0	0.0808081	495	91	0	91	0.15529	200.243	35.7917	515.808	76.7692	0.12912	0.0261696	1	0.940573
150	J13	TPKI-69	1	treatment	Cas1	190226_IDG_54	72	610	0.521905	0.169524	0.209524	0.0247619	0.00190476	0.072381	525	85	0	85	0.139344	200.243	35.7917	515.808	76.7692	0.12912	0.0102238	2	1.02605
30	D13	TPKI-72	1	treatment	Cas1	190226_IDG_53	72	549	0.472103	0.206009	0.208155	0.0300429	0.0193133	0.0643777	466	83	0	83	0.151184	200.243	35.7917	515.808	76.7692	0.12912	0.0220635	1	0.85662
30	D13	TPKI-72	1	treatment	Cas1	190226_IDG_54	72	598	0.464762	0.194286	0.19619	0.0342857	0.0285714	0.0819048	525	73	0	73	0.122074	200.243	35.7917	515.808	76.7692	0.12912	-0.0070469	2	1.02605
38	D21	TPKI-85	1	treatment	Cas1	190226_IDG_53	72	695	0.477157	0.147208	0.22335	0.0406091	0	0.111675	591	104	0	104	0.14964	200.243	35.7917	515.808	76.7692	0.12912	0.0205198	1	1.20965
38	D21	TPKI-85	1	treatment	Cas1	190226_IDG_54	72	574	0.503119	0.185031	0.193347	0.043659	0.002079	0.0727651	481	93	0	93	0.162021	200.243	35.7917	515.808	76.7692	0.12912	0.0329004	2	0.900213
101	H04	TPKI-91	1	treatment	Cas1	190226_IDG_53	72	551	0.527383	0.182556	0.180527	0.0283976	0.010142	0.0709939	493	58	0	58	0.105263	200.243	35.7917	515.808	76.7692	0.12912	-0.0238573	1	0.934826
101	H04	TPKI-91	1	treatment	Cas1	190226_IDG_54	72	551	0.52193	0.173246	0.20614	0.0175439	0	0.0811404	456	95	0	95	0.172414	200.243	35.7917	515.808	76.7692	0.12912	0.0432933	2	0.827349
56	E19	TPKI-97	1	treatment	Cas1	190226_IDG_53	72	569	0.470103	0.212371	0.212371	0.0350515	0	0.0701031	485	84	0	84	0.147627	200.243	35.7917	515.808	76.7692	0.12912	0.0185069	1	0.911776
56	E19	TPKI-97	1	treatment	Cas1	190226_IDG_54	72	645	0.538879	0.148282	0.189873	0.0289331	0	0.0940325	553	92	0	92	0.142636	200.243	35.7917	515.808	76.7692	0.12912	0.0135152	2	1.10465
58	E21	TX-85-1	1	treatment	Cas1	190226_IDG_53	72	495	0.510588	0.134118	0.204706	0.0305882	0	0.12	425	70	0	70	0.141414	200.243	35.7917	515.808	76.7692	0.12912	0.0122937	1	0.735493
58	E21	TX-85-1	1	treatment	Cas1	190226_IDG_54	72	592	0.478448	0.211207	0.0862069	0.0344828	0.163793	0.0258621	232	360	0	360	0.608108	200.243	35.7917	515.808	76.7692	0.12912	0.478988	2	0.113867
108	H11	UNC-AA-1-0013 (SGC-AAK1-1)	1	treatment	Cas1	190226_IDG_53	72	527	0.526882	0.11828	0.249462	0.0344086	0	0.0709677	465	62	0	62	0.117647	200.243	35.7917	515.808	76.7692	0.12912	-0.0114734	1	0.8537
108	H11	UNC-AA-1-0013 (SGC-AAK1-1)	1	treatment	Cas1	190226_IDG_54	72	590	0.497076	0.202729	0.194932	0.0350877	0	0.0701754	513	77	0	77	0.130508	200.243	35.7917	515.808	76.7692	0.12912	0.001388	2	0.992019
164	K07	UNC-AA-1-0017	1	treatment	Cas1	190226_IDG_53	72	647	0.506261	0.152057	0.207513	0.0375671	0.00894454	0.0876565	559	88	0	88	0.136012	200.243	35.7917	515.808	76.7692	0.12912	0.00689189	1	1.12136
164	K07	UNC-AA-1-0017	1	treatment	Cas1	190226_IDG_54	72	572	0.411178	0.239521	0.225549	0.0339321	0.00798403	0.0818363	501	71	0	71	0.124126	200.243	35.7917	515.808	76.7692	0.12912	-0.0049946	2	0.957776
91	G14	VE-821	1	treatment	Cas1	190226_IDG_53	72	618	0.491429	0.125714	0.259048	0.0457143	0.00952381	0.0685714	525	93	0	93	0.150485	200.243	35.7917	515.808	76.7692	0.12912	0.021365	1	1.02605
91	G14	VE-821	1	treatment	Cas1	190226_IDG_54	72	619	0.520295	0.188192	0.197417	0.0350554	0	0.0590406	542	77	0	77	0.124394	200.243	35.7917	515.808	76.7692	0.12912	-0.00472629	2	1.0739
55	E18	VE-822	1	treatment	Cas1	190226_IDG_53	72	470	0.475196	0.120104	0.224543	0.0939948	0.0104439	0.075718	383	87	0	87	0.185106	200.243	35.7917	515.808	76.7692	0.12912	0.0559859	1	0.608121
55	E18	VE-822	1	treatment	Cas1	190226_IDG_54	72	510	0.519149	0.170213	0.0893617	0.0468085	0.165957	0.00851064	235	275	0	275	0.539216	200.243	35.7917	515.808	76.7692	0.12912	0.410095	2	0.1244
110	H13	Vertex 11e	1	treatment	Cas1	190226_IDG_53	72	560	0.468683	0.161987	0.235421	0.0431965	0	0.0907127	463	97	0	97	0.173214	200.243	35.7917	515.808	76.7692	0.12912	0.0440938	1	0.847856
110	H13	Vertex 11e	1	treatment	Cas1	190226_IDG_54	72	663	0.498227	0.173759	0.210993	0.0301418	0.0124113	0.0744681	564	99	0	99	0.149321	200.243	35.7917	515.808	76.7692	0.12912	0.0202008	2	1.13524
79	F22	WZ4003	1	treatment	Cas1	190226_IDG_53	72	514	0.46729	0.175234	0.200935	0.0373832	0	0.119159	428	86	0	86	0.167315	200.243	35.7917	515.808	76.7692	0.12912	0.0381947	1	0.744459
79	F22	WZ4003	1	treatment	Cas1	190226_IDG_54	72	633	0.471954	0.205029	0.185687	0.0444874	0	0.0928433	517	116	0	116	0.183254	200.243	35.7917	515.808	76.7692	0.12912	0.0541339	2	1.00339
133	I16	XMD-17-51	1	treatment	Cas1	190226_IDG_53	72	340	0.286885	0.0942623	0.241803	0.180328	0	0.196721	244	96	0	96	0.282353	200.243	35.7917	515.808	76.7692	0.12912	0.153232	1	0.155787
133	I16	XMD-17-51	1	treatment	Cas1	190226_IDG_54	72	350	0.211618	0.149378	0.385892	0.0954357	0.06639	0.0912863	241	109	0	109	0.311429	200.243	35.7917	515.808	76.7692	0.12912	0.182308	2	0.14536
71	F14	XMD8-87	1	treatment	Cas1	190226_IDG_53	72	642	0.407733	0.196837	0.226714	0.0544815	0.0210896	0.0931459	569	73	0	73	0.113707	200.243	35.7917	515.808	76.7692	0.12912	-0.0154133	1	1.14909
71	F14	XMD8-87	1	treatment	Cas1	190226_IDG_54	72	693	0.501689	0.138514	0.253378	0.0337838	0.00675676	0.0658784	592	101	0	101	0.145743	200.243	35.7917	515.808	76.7692	0.12912	0.0166227	2	1.21239
17	C20	XMD8-92	1	treatment	Cas1	190226_IDG_53	72	506	0.487414	0.15103	0.226545	0.0297483	0	0.105263	437	69	0	69	0.136364	200.243	35.7917	515.808	76.7692	0.12912	0.00724316	1	0.771256
17	C20	XMD8-92	1	treatment	Cas1	190226_IDG_54	72	561	0.523207	0.185654	0.170886	0.0400844	0.0021097	0.0780591	474	87	0	87	0.15508	200.243	35.7917	515.808	76.7692	0.12912	0.0259597	2	0.879915
0	H21	AH5015	1	treatment	Colo858	190219_IDG_23	72	9020	0.44071	0.337418	0.137021	0.0250934	0.00665266	0.0531046	8568	452	0	452	0.0501109	1106.53	66.5542	8615.3	650.558	0.0701842	-0.0200733	1	0.996285
0	H21	AH5015	1	treatment	Colo858	190219_IDG_24	72	8696	0.428977	0.351541	0.136621	0.0250308	0	0.0578298	8110	586	0	586	0.0673873	1106.53	66.5542	8615.3	650.558	0.0701842	-0.00279689	2	0.959587
1	H06	BI00007366	1	treatment	Colo858	190219_IDG_23	72	9708	0.455284	0.315721	0.140645	0.0243612	0.014725	0.0492638	9236	472	0	472	0.0486197	1106.53	66.5542	8615.3	650.558	0.0701842	-0.0215645	1	1.04755
1	H06	BI00007366	1	treatment	Colo858	190219_IDG_24	72	9742	0.439194	0.357322	0.129995	0.0217746	0.00860098	0.0431138	9185	557	0	557	0.0571751	1106.53	66.5542	8615.3	650.558	0.0701842	-0.0130091	2	1.04372
2	I17	BI00009348	1	treatment	Colo858	190219_IDG_23	72	9480	0.455785	0.325098	0.142202	0.023924	0	0.0529905	8945	535	0	535	0.0564346	1106.53	66.5542	8615.3	650.558	0.0701842	-0.0137496	1	1.02553
2	I17	BI00009348	1	treatment	Colo858	190219_IDG_24	72	8898	0.447807	0.346731	0.127202	0.0218702	0.00756591	0.0488237	8459	439	0	439	0.0493369	1106.53	66.5542	8615.3	650.558	0.0701842	-0.0208473	2	0.987671
3	M18	BI00036838	1	treatment	Colo858	190219_IDG_23	72	1676	0.416601	0.0516836	0.348473	0.0775255	0.0172279	0.0884886	1277	399	0	399	0.238067	1106.53	66.5542	8615.3	650.558	0.0701842	0.167883	1	0.0495835
3	M18	BI00036838	1	treatment	Colo858	190219_IDG_24	72	1481	0.447049	0.0651042	0.294271	0.0876736	0.0329861	0.0729167	1152	329	0	329	0.222147	1106.53	66.5542	8615.3	650.558	0.0701842	0.151963	2	0.0136944
4	K06	BI00047804	1	treatment	Colo858	190219_IDG_23	72	9502	0.456655	0.321922	0.14866	0.0219334	0	0.0508298	8617	885	0	885	0.0931383	1106.53	66.5542	8615.3	650.558	0.0701842	0.0229541	1	1.00013
4	K06	BI00047804	1	treatment	Colo858	190219_IDG_24	72	9853	0.452885	0.333782	0.141961	0.0215126	0	0.0498599	8925	928	0	928	0.0941845	1106.53	66.5542	8615.3	650.558	0.0701842	0.0240003	2	1.024
5	G04	BI00113608	1	treatment	Colo858	190219_IDG_23	72	9008	0.45	0.330676	0.141667	0.0235507	0	0.0541063	8280	728	0	728	0.0808171	1106.53	66.5542	8615.3	650.558	0.0701842	0.0106329	1	0.973365
5	G04	BI00113608	1	treatment	Colo858	190219_IDG_24	72	9222	0.449373	0.339758	0.13307	0.0213655	0	0.0564329	8612	610	0	610	0.0661462	1106.53	66.5542	8615.3	650.558	0.0701842	-0.00403802	2	0.999741
6	E10	BI00133844	1	treatment	Colo858	190219_IDG_23	72	8667	0.442769	0.324287	0.134439	0.0281442	0	0.0703606	7959	708	0	708	0.0816892	1106.53	66.5542	8615.3	650.558	0.0701842	0.011505	1	0.947187
6	E10	BI00133844	1	treatment	Colo858	190219_IDG_24	72	9147	0.447034	0.314588	0.140292	0.0249673	0	0.0731185	8411	736	0	736	0.0804635	1106.53	66.5542	8615.3	650.558	0.0701842	0.0102793	2	0.983855
7	H15	BI00601000	1	treatment	Colo858	190219_IDG_23	72	9311	0.459827	0.322073	0.137868	0.0249943	0	0.0552385	8762	549	0	549	0.0589625	1106.53	66.5542	8615.3	650.558	0.0701842	-0.0112217	1	1.01144
7	H15	BI00601000	1	treatment	Colo858	190219_IDG_24	72	9202	0.437311	0.350081	0.137241	0.0207025	0.0123284	0.0423354	8598	604	0	604	0.0656379	1106.53	66.5542	8615.3	650.558	0.0701842	-0.00454629	2	0.998643
8	C21	BI00604564	1	treatment	Colo858	190219_IDG_23	72	9092	0.448042	0.346581	0.130801	0.0217417	0	0.0528346	8555	537	0	537	0.0590629	1106.53	66.5542	8615.3	650.558	0.0701842	-0.0111213	1	0.995261
8	C21	BI00604564	1	treatment	Colo858	190219_IDG_24	72	8977	0.457701	0.325118	0.128436	0.0283175	0.0189573	0.0414692	8440	537	0	537	0.0598195	1106.53	66.5542	8615.3	650.558	0.0701842	-0.0103647	2	0.986162
9	L14	BI00614644	1	treatment	Colo858	190219_IDG_23	72	9472	0.425747	0.323635	0.145136	0.0235902	0.00876208	0.0731296	8902	570	0	570	0.0601774	1106.53	66.5542	8615.3	650.558	0.0701842	-0.0100068	1	1.02224
9	L14	BI00614644	1	treatment	Colo858	190219_IDG_24	72	9413	0.418626	0.328109	0.147757	0.0253265	0.010335	0.0698467	8805	608	0	608	0.0645915	1106.53	66.5542	8615.3	650.558	0.0701842	-0.00559267	2	1.01477
10	G19	BI00645435	1	treatment	Colo858	190219_IDG_23	72	8554	0.544072	0.269255	0.114724	0.0279392	0.00667573	0.0373347	8089	465	0	465	0.0543605	1106.53	66.5542	8615.3	650.558	0.0701842	-0.0158237	1	0.957872
10	G19	BI00645435	1	treatment	Colo858	190219_IDG_24	72	9183	0.548562	0.265823	0.12382	0.0204833	0	0.0413119	8690	493	0	493	0.0536862	1106.53	66.5542	8615.3	650.558	0.0701842	-0.016498	2	1.00584
11	F21	BI00801818	1	treatment	Colo858	190219_IDG_23	72	8829	0.428999	0.33577	0.140563	0.0260036	0	0.0686639	8345	484	0	484	0.0548193	1106.53	66.5542	8615.3	650.558	0.0701842	-0.0153649	1	0.978583
11	F21	BI00801818	1	treatment	Colo858	190219_IDG_24	72	8788	0.433215	0.33411	0.136637	0.0250215	0	0.0710168	8153	635	0	635	0.0722576	1106.53	66.5542	8615.3	650.558	0.0701842	0.00207343	2	0.96309
12	K14	BI00865461	1	treatment	Colo858	190219_IDG_23	72	1115	0.892807	0.0239774	0.0634697	0.0183357	0	0.00141044	709	406	0	406	0.364126	1106.53	66.5542	8615.3	650.558	0.0701842	0.293941	1	-0.139582
12	K14	BI00865461	1	treatment	Colo858	190219_IDG_24	72	825	0.906716	0.0242537	0.0298507	0.0223881	0.016791	0	536	289	0	289	0.350303	1106.53	66.5542	8615.3	650.558	0.0701842	0.280119	2	-0.217147
13	K21	BI01125081	1	treatment	Colo858	190219_IDG_23	72	9215	0.439396	0.346194	0.13097	0.0264962	0	0.0569436	8605	610	0	610	0.0661964	1106.53	66.5542	8615.3	650.558	0.0701842	-0.00398778	1	0.999192
13	K21	BI01125081	1	treatment	Colo858	190219_IDG_24	72	9286	0.445182	0.34986	0.135475	0.0196695	0	0.0498138	8592	694	0	694	0.0747362	1106.53	66.5542	8615.3	650.558	0.0701842	0.00455197	2	0.998172
14	K16	BI2536	1	treatment	Colo858	190219_IDG_23	72	1898	0.0780182	0.0102506	0.774487	0.0455581	0	0.0916856	1756	142	0	142	0.0748156	1106.53	66.5542	8615.3	650.558	0.0701842	0.0046314	1	0.168793
14	K16	BI2536	1	treatment	Colo858	190219_IDG_24	72	1790	0.0568955	0.00989487	0.745826	0.0420532	0	0.145331	1617	173	0	173	0.096648	1106.53	66.5542	8615.3	650.558	0.0701842	0.0264638	2	0.136689
15	K08	BIBF0846CL	1	treatment	Colo858	190219_IDG_23	72	9154	0.435131	0.328913	0.146253	0.0270236	0	0.0626798	7993	1161	0	1161	0.12683	1106.53	66.5542	8615.3	650.558	0.0701842	0.0566456	1	0.949993
15	K08	BIBF0846CL	1	treatment	Colo858	190219_IDG_24	72	9840	0.427157	0.343543	0.147316	0.0209619	0	0.0610225	8587	1253	0	1253	0.127337	1106.53	66.5542	8615.3	650.558	0.0701842	0.0571532	2	0.997779
16	E09	BIBW3133BS	1	treatment	Colo858	190219_IDG_23	72	8915	0.430671	0.332899	0.133681	0.0302204	0.0240578	0.0484712	8438	477	0	477	0.0535053	1106.53	66.5542	8615.3	650.558	0.0701842	-0.0166789	1	0.986003
16	E09	BIBW3133BS	1	treatment	Colo858	190219_IDG_24	72	9065	0.433561	0.336921	0.136706	0.0283459	0	0.064466	8361	704	0	704	0.0776613	1106.53	66.5542	8615.3	650.558	0.0701842	0.00747714	2	0.979864
17	K20	BIRB0876BS	1	treatment	Colo858	190219_IDG_23	72	9819	0.403967	0.350393	0.141001	0.024963	0	0.0796763	8773	1046	0	1046	0.106528	1106.53	66.5542	8615.3	650.558	0.0701842	0.036344	1	1.01229
17	K20	BIRB0876BS	1	treatment	Colo858	190219_IDG_24	72	9398	0.419116	0.339172	0.14143	0.0189278	0	0.0813543	8506	892	0	892	0.0949138	1106.53	66.5542	8615.3	650.558	0.0701842	0.0247296	2	0.991394
18	F11	BIRZ0518XX	1	treatment	Colo858	190219_IDG_23	72	9254	0.441423	0.333907	0.142972	0.0222605	0	0.0594378	8715	539	0	539	0.0582451	1106.53	66.5542	8615.3	650.558	0.0701842	-0.0119391	1	1.00779
18	F11	BIRZ0518XX	1	treatment	Colo858	190219_IDG_24	72	9520	0.430752	0.33953	0.147103	0.0270797	0	0.0555364	8715	805	0	805	0.0845588	1106.53	66.5542	8615.3	650.558	0.0701842	0.0143746	1	1.00779
19	F18	BMX-IN-1	1	treatment	Colo858	190219_IDG_23	72	8687	0.45482	0.332648	0.124955	0.0237087	0.00568525	0.0581831	8267	420	0	420	0.0483481	1106.53	66.5542	8615.3	650.558	0.0701842	-0.0218361	1	0.972318
19	F18	BMX-IN-1	1	treatment	Colo858	190219_IDG_24	72	8529	0.455222	0.307368	0.13483	0.0295212	0.0291491	0.0439097	8062	467	0	467	0.0547544	1106.53	66.5542	8615.3	650.558	0.0701842	-0.0154298	2	0.955662
20	F04	CA93.0	1	treatment	Colo858	190219_IDG_23	72	5870	0.558093	0.110626	0.180139	0.0474677	0.00873883	0.0949355	5035	835	0	835	0.142249	1106.53	66.5542	8615.3	650.558	0.0701842	0.0720645	1	0.668189
20	F04	CA93.0	1	treatment	Colo858	190219_IDG_24	72	5566	0.530429	0.106711	0.190079	0.049604	0.0298041	0.0933722	4798	768	0	768	0.137981	1106.53	66.5542	8615.3	650.558	0.0701842	0.0677964	2	0.641244
21	I04	CCT241533	1	treatment	Colo858	190219_IDG_23	72	9298	0.427196	0.348168	0.140089	0.0232504	0	0.0612964	8516	782	0	782	0.0841041	1106.53	66.5542	8615.3	650.558	0.0701842	0.0139199	1	0.992185
21	I04	CCT241533	1	treatment	Colo858	190219_IDG_24	72	9779	0.412811	0.346364	0.142694	0.0235924	0	0.0745384	8774	1005	0	1005	0.102771	1106.53	66.5542	8615.3	650.558	0.0701842	0.032587	2	1.01237
22	D04	CCT244747	1	treatment	Colo858	190219_IDG_23	72	7261	0.518164	0.202824	0.15267	0.0623621	0.00367701	0.060303	6799	462	0	462	0.0636276	1106.53	66.5542	8615.3	650.558	0.0701842	-0.0065566	1	0.846298
22	D04	CCT244747	1	treatment	Colo858	190219_IDG_24	72	7273	0.512199	0.214463	0.145069	0.0596056	0.00350621	0.065157	6845	428	0	428	0.0588478	1106.53	66.5542	8615.3	650.558	0.0701842	-0.0113364	2	0.850508
23	I18	CCT251545	1	treatment	Colo858	190219_IDG_23	72	6966	0.503071	0.276894	0.139392	0.032131	0	0.0485116	6349	617	0	617	0.0885731	1106.53	66.5542	8615.3	650.558	0.0701842	0.0183889	1	0.804087
23	I18	CCT251545	1	treatment	Colo858	190219_IDG_24	72	7171	0.509379	0.280443	0.132841	0.028444	0	0.048893	6504	667	0	667	0.0930135	1106.53	66.5542	8615.3	650.558	0.0701842	0.0228293	2	0.818844
24	F03	CCT251921	1	treatment	Colo858	190219_IDG_23	72	6902	0.500938	0.257348	0.141651	0.0295497	0.0229831	0.0475297	6396	506	0	506	0.0733121	1106.53	66.5542	8615.3	650.558	0.0701842	0.00312789	1	0.808587
24	F03	CCT251921	1	treatment	Colo858	190219_IDG_24	72	6906	0.494704	0.257165	0.140187	0.0339564	0.0227414	0.0512461	6420	486	0	486	0.0703736	1106.53	66.5542	8615.3	650.558	0.0701842	0.000189391	2	0.810876
25	L06	D2202-1	1	treatment	Colo858	190219_IDG_23	72	9638	0.431872	0.310696	0.141137	0.0276633	0.0398134	0.0488175	9218	420	0	420	0.0435775	1106.53	66.5542	8615.3	650.558	0.0701842	-0.0266067	1	1.0462
25	L06	D2202-1	1	treatment	Colo858	190219_IDG_24	72	9911	0.425577	0.340462	0.1381	0.0220236	0.0350037	0.0388339	9399	512	0	512	0.0516598	1106.53	66.5542	8615.3	650.558	0.0701842	-0.0185244	2	1.05968
26	C19	DDR1-IN-1	1	treatment	Colo858	190219_IDG_23	72	8781	0.427684	0.345437	0.134519	0.0265627	0.00950408	0.0562934	8207	574	0	574	0.0653684	1106.53	66.5542	8615.3	650.558	0.0701842	-0.00481579	1	0.967472
26	C19	DDR1-IN-1	1	treatment	Colo858	190219_IDG_24	72	8698	0.438014	0.335053	0.130851	0.0270303	0.0223615	0.0466888	8139	559	0	559	0.0642676	1106.53	66.5542	8615.3	650.558	0.0701842	-0.00591655	2	0.961951
79	C17	ERK5-IN-1	1	treatment	Colo858	190219_IDG_23	72	8441	0.503109	0.26393	0.138806	0.0287313	0.015796	0.0496269	8040	401	0	401	0.0475062	1106.53	66.5542	8615.3	650.558	0.0701842	-0.022678	1	0.953858
79	C17	ERK5-IN-1	1	treatment	Colo858	190219_IDG_24	72	7934	0.467543	0.294703	0.139519	0.0252224	0.0269481	0.046064	7533	401	0	401	0.050542	1106.53	66.5542	8615.3	650.558	0.0701842	-0.0196422	2	0.911345
80	L04	FM-381	1	treatment	Colo858	190219_IDG_23	72	9707	0.438272	0.325103	0.135586	0.0233918	0.0232835	0.0543643	9234	473	0	473	0.0487277	1106.53	66.5542	8615.3	650.558	0.0701842	-0.0214565	1	1.0474
80	L04	FM-381	1	treatment	Colo858	190219_IDG_24	72	9504	0.43134	0.325315	0.141553	0.0261722	0.0187103	0.0569106	8979	525	0	525	0.0552399	1106.53	66.5542	8615.3	650.558	0.0701842	-0.0149443	2	1.02813
81	E08	GNF-5	1	treatment	Colo858	190219_IDG_23	72	9083	0.43862	0.323073	0.146327	0.027053	0	0.0649273	8317	766	0	766	0.0843334	1106.53	66.5542	8615.3	650.558	0.0701842	0.0141492	1	0.976339
81	E08	GNF-5	1	treatment	Colo858	190219_IDG_24	72	8508	0.425442	0.357417	0.13733	0.0257494	0	0.054061	7806	702	0	702	0.0825106	1106.53	66.5542	8615.3	650.558	0.0701842	0.0123264	2	0.934464
82	F17	GR269666A	1	treatment	Colo858	190219_IDG_23	72	9196	0.427293	0.348215	0.130609	0.0244462	0.0140021	0.0554344	8713	483	0	483	0.0525228	1106.53	66.5542	8615.3	650.558	0.0701842	-0.0176614	1	1.00763
82	F17	GR269666A	1	treatment	Colo858	190219_IDG_24	72	9701	0.43626	0.325551	0.13592	0.0258687	0.0240053	0.052395	9123	578	0	578	0.0595815	1106.53	66.5542	8615.3	650.558	0.0701842	-0.0106027	2	1.03905
83	M21	GSK1070916	1	treatment	Colo858	190219_IDG_23	72	1824	0.10665	0.0332497	0.177541	0.0752823	0	0.607277	1594	230	0	230	0.126096	1106.53	66.5542	8615.3	650.558	0.0701842	0.0559123	1	0.131203
83	M21	GSK1070916	1	treatment	Colo858	190219_IDG_24	72	1784	0.119718	0.0230474	0.159411	0.0537772	0	0.644046	1562	222	0	222	0.124439	1106.53	66.5542	8615.3	650.558	0.0701842	0.0542553	2	0.123481
84	C16	GSK1122999	1	treatment	Colo858	190219_IDG_23	72	9117	0.425924	0.323619	0.139129	0.0252408	0	0.0860871	8201	916	0	916	0.100472	1106.53	66.5542	8615.3	650.558	0.0701842	0.0302874	1	0.966986
84	C16	GSK1122999	1	treatment	Colo858	190219_IDG_24	72	9126	0.452018	0.320672	0.137854	0.0257958	0	0.0636611	8451	675	0	675	0.0739645	1106.53	66.5542	8615.3	650.558	0.0701842	0.0037803	2	0.987036
85	L15	GSK114	1	treatment	Colo858	190219_IDG_23	72	8564	0.421059	0.334678	0.142749	0.0226986	0	0.0788146	7930	634	0	634	0.0740308	1106.53	66.5542	8615.3	650.558	0.0701842	0.00384663	1	0.944788
85	L15	GSK114	1	treatment	Colo858	190219_IDG_24	72	8877	0.42057	0.33154	0.145408	0.024948	0	0.0775345	8177	700	0	700	0.0788555	1106.53	66.5542	8615.3	650.558	0.0701842	0.00867127	2	0.96504
86	M10	GSK1379710	1	treatment	Colo858	190219_IDG_23	72	9712	0.423863	0.332191	0.156645	0.0264619	0	0.0608387	8465	1247	0	1247	0.128398	1106.53	66.5542	8615.3	650.558	0.0701842	0.0582137	1	0.988147
86	M10	GSK1379710	1	treatment	Colo858	190219_IDG_24	72	9377	0.40534	0.363658	0.144255	0.0211429	0	0.0656035	8277	1100	0	1100	0.117308	1106.53	66.5542	8615.3	650.558	0.0701842	0.0471241	2	0.973123
87	M14	GSK1379712	1	treatment	Colo858	190219_IDG_23	72	8889	0.388867	0.362441	0.148491	0.0241449	0	0.0760563	7455	1434	0	1434	0.161323	1106.53	66.5542	8615.3	650.558	0.0701842	0.0911388	1	0.904637
87	M14	GSK1379712	1	treatment	Colo858	190219_IDG_24	72	8995	0.426591	0.34196	0.146327	0.0202379	0	0.0648841	8153	842	0	842	0.0936076	1106.53	66.5542	8615.3	650.558	0.0701842	0.0234234	2	0.96309
88	H19	GSK1379761	1	treatment	Colo858	190219_IDG_23	72	8860	0.433673	0.344038	0.138286	0.0252846	0	0.0587178	8345	515	0	515	0.0581264	1106.53	66.5542	8615.3	650.558	0.0701842	-0.0120578	1	0.978583
88	H19	GSK1379761	1	treatment	Colo858	190219_IDG_24	72	8299	0.456497	0.319954	0.144672	0.0251492	0.00889115	0.0448368	7873	426	0	426	0.0513315	1106.53	66.5542	8615.3	650.558	0.0701842	-0.0188527	2	0.940056
89	H07	GSK1379762	1	treatment	Colo858	190219_IDG_23	72	9047	0.446174	0.339574	0.130587	0.0208285	0.00573368	0.0571027	8546	501	0	501	0.0553775	1106.53	66.5542	8615.3	650.558	0.0701842	-0.0148067	1	0.994552
89	H07	GSK1379762	1	treatment	Colo858	190219_IDG_24	72	8509	0.438273	0.339434	0.137592	0.0249937	0.00833123	0.0513759	7922	587	0	587	0.0689858	1106.53	66.5542	8615.3	650.558	0.0701842	-0.00119842	2	0.944125
90	H22	GSK1392956A	1	treatment	Colo858	190219_IDG_23	72	8750	0.449771	0.325223	0.134185	0.0257769	0.00686582	0.0581788	8302	448	0	448	0.0512	1106.53	66.5542	8615.3	650.558	0.0701842	-0.0189842	1	0.975134
90	H22	GSK1392956A	1	treatment	Colo858	190219_IDG_24	72	9109	0.456251	0.327703	0.131597	0.0267417	0	0.0577058	8526	583	0	583	0.0640026	1106.53	66.5542	8615.3	650.558	0.0701842	-0.00618156	2	0.992974
91	H08	GSK1398477	1	treatment	Colo858	190219_IDG_23	72	5559	0.491624	0.280632	0.124788	0.0231508	0.00884623	0.070958	5313	246	0	246	0.0442526	1106.53	66.5542	8615.3	650.558	0.0701842	-0.0259316	1	0.698745
91	H08	GSK1398477	1	treatment	Colo858	190219_IDG_24	72	5695	0.4833	0.27422	0.136741	0.0278649	0.0177154	0.0601587	5419	276	0	276	0.0484636	1106.53	66.5542	8615.3	650.558	0.0701842	-0.0217206	2	0.710117
92	J17	GSK1838705	1	treatment	Colo858	190219_IDG_23	72	7828	0.458412	0.310891	0.1356	0.0257383	0.0112436	0.0581143	7382	446	0	446	0.056975	1106.53	66.5542	8615.3	650.558	0.0701842	-0.0132092	1	0.898318
92	J17	GSK1838705	1	treatment	Colo858	190219_IDG_24	72	7629	0.434395	0.340337	0.123139	0.0258801	0.021845	0.0544038	7187	442	0	442	0.0579368	1106.53	66.5542	8615.3	650.558	0.0701842	-0.0122474	2	0.881231
93	L13	GSK1904529	1	treatment	Colo858	190219_IDG_23	72	8759	0.408299	0.333292	0.152467	0.0220967	0.0104346	0.0734103	8146	613	0	613	0.0699852	1106.53	66.5542	8615.3	650.558	0.0701842	-0.000199039	1	0.96252
93	L13	GSK1904529	1	treatment	Colo858	190219_IDG_24	72	9363	0.411539	0.351285	0.143771	0.0222171	0	0.0711876	8597	766	0	766	0.0818114	1106.53	66.5542	8615.3	650.558	0.0701842	0.0116272	2	0.998564
94	G05	GSK190937	1	treatment	Colo858	190219_IDG_23	72	9332	0.450577	0.333974	0.131984	0.0231848	0.00746437	0.0528161	8842	490	0	490	0.0525075	1106.53	66.5542	8615.3	650.558	0.0701842	-0.0176767	1	1.01762
94	G05	GSK190937	1	treatment	Colo858	190219_IDG_24	72	9176	0.458178	0.343313	0.122787	0.0266775	0	0.0490447	8584	592	0	592	0.0645161	1106.53	66.5542	8615.3	650.558	0.0701842	-0.00566807	2	0.997543
95	D18	GSK200398A	1	treatment	Colo858	190219_IDG_23	72	7689	0.455446	0.320901	0.127085	0.020887	0.0188526	0.056829	7373	316	0	316	0.0410977	1106.53	66.5542	8615.3	650.558	0.0701842	-0.0290865	1	0.897536
95	D18	GSK200398A	1	treatment	Colo858	190219_IDG_24	72	8044	0.445557	0.321322	0.128008	0.0265383	0.0166515	0.0619227	7687	357	0	357	0.0443809	1106.53	66.5542	8615.3	650.558	0.0701842	-0.0258033	2	0.924453
96	F12	GSK204607	1	treatment	Colo858	190219_IDG_23	72	9668	0.419278	0.330214	0.1469	0.0257046	0.0126268	0.0652762	8870	798	0	798	0.0825403	1106.53	66.5542	8615.3	650.558	0.0701842	0.0123561	1	1.01978
96	F12	GSK204607	1	treatment	Colo858	190219_IDG_24	72	9223	0.436319	0.32808	0.140572	0.0286244	0.0200487	0.0463553	8629	594	0	594	0.0644042	1106.53	66.5542	8615.3	650.558	0.0701842	-0.00577999	2	1.00107
97	M20	GSK204919	1	treatment	Colo858	190219_IDG_23	72	8515	0.523156	0.292223	0.124969	0.0191291	0	0.0405235	7946	569	0	569	0.0668233	1106.53	66.5542	8615.3	650.558	0.0701842	-0.00336094	1	0.946113
97	M20	GSK204919	1	treatment	Colo858	190219_IDG_24	72	8038	0.519383	0.287955	0.119538	0.0212628	0.0136134	0.0382471	7713	325	0	325	0.0404329	1106.53	66.5542	8615.3	650.558	0.0701842	-0.0297513	2	0.926649
98	M08	GSK2219385	1	treatment	Colo858	190219_IDG_23	72	9075	0.405385	0.34147	0.145949	0.0223956	0	0.0848012	7948	1127	0	1127	0.124187	1106.53	66.5542	8615.3	650.558	0.0701842	0.0540031	1	0.946278
98	M08	GSK2219385	1	treatment	Colo858	190219_IDG_24	72	9409	0.417673	0.353462	0.149109	0.0259476	0	0.0538084	8363	1046	0	1046	0.11117	1106.53	66.5542	8615.3	650.558	0.0701842	0.040986	2	0.980024
99	M11	GSK223675	1	treatment	Colo858	190219_IDG_23	72	9306	0.477531	0.307755	0.124721	0.0263992	0.0312097	0.032383	8523	783	0	783	0.0841393	1106.53	66.5542	8615.3	650.558	0.0701842	0.0139551	1	0.992738
99	M11	GSK223675	1	treatment	Colo858	190219_IDG_24	72	9340	0.489827	0.310571	0.133068	0.0187091	0	0.0478251	8552	788	0	788	0.0843683	1106.53	66.5542	8615.3	650.558	0.0701842	0.0141841	2	0.995025
100	L08	GSK2250882	1	treatment	Colo858	190219_IDG_23	72	9454	0.400202	0.34295	0.142905	0.0231253	0.0202066	0.0706107	8908	546	0	546	0.0577533	1106.53	66.5542	8615.3	650.558	0.0701842	-0.0124309	1	1.0227
100	L08	GSK2250882	1	treatment	Colo858	190219_IDG_24	72	9683	0.407666	0.34563	0.144899	0.025036	0.0122964	0.0644732	9027	656	0	656	0.0677476	1106.53	66.5542	8615.3	650.558	0.0701842	-0.0024366	2	1.03178
101	I05	GSK2269557	1	treatment	Colo858	190219_IDG_23	72	9234	0.451349	0.321074	0.139728	0.0259396	0.00991469	0.0519945	8674	560	0	560	0.0606454	1106.53	66.5542	8615.3	650.558	0.0701842	-0.00953876	1	1.00459
101	I05	GSK2269557	1	treatment	Colo858	190219_IDG_24	72	9005	0.459871	0.339722	0.125779	0.0229995	0	0.0516291	8348	657	0	657	0.0729595	1106.53	66.5542	8615.3	650.558	0.0701842	0.00277527	2	0.978824
102	D14	GSK2283293	1	treatment	Colo858	190219_IDG_23	72	9482	0.424715	0.332118	0.13918	0.0268793	0	0.0771071	8780	702	0	702	0.074035	1106.53	66.5542	8615.3	650.558	0.0701842	0.00385082	1	1.01283
102	D14	GSK2283293	1	treatment	Colo858	190219_IDG_24	72	8941	0.411249	0.349525	0.136474	0.0225225	0	0.0802289	8214	727	0	727	0.0813108	1106.53	66.5542	8615.3	650.558	0.0701842	0.0111266	2	0.968038
103	I10	GSK2288359	1	treatment	Colo858	190219_IDG_23	72	9023	0.422509	0.346941	0.134136	0.0212185	0	0.0751954	8059	964	0	964	0.106838	1106.53	66.5542	8615.3	650.558	0.0701842	0.0366539	1	0.955416
103	I10	GSK2288359	1	treatment	Colo858	190219_IDG_24	72	9638	0.446072	0.335604	0.129314	0.0245232	0	0.0644868	8808	830	0	830	0.0861175	1106.53	66.5542	8615.3	650.558	0.0701842	0.0159333	2	1.015
104	I06	GSK2292767	1	treatment	Colo858	190219_IDG_23	72	7673	0.501887	0.278546	0.134032	0.027673	0	0.0578616	7155	518	0	518	0.0675094	1106.53	66.5542	8615.3	650.558	0.0701842	-0.00267475	1	0.878398
104	I06	GSK2292767	1	treatment	Colo858	190219_IDG_24	72	7673	0.495189	0.274439	0.143774	0.0271929	0.0101799	0.049226	7171	502	0	502	0.0654242	1106.53	66.5542	8615.3	650.558	0.0701842	-0.00475998	2	0.879816
105	C09	GSK2297428	1	treatment	Colo858	190219_IDG_23	72	8275	0.360104	0.3233	0.156793	0.0291422	0	0.130661	7309	966	0	966	0.116737	1106.53	66.5542	8615.3	650.558	0.0701842	0.046553	1	0.891957
105	C09	GSK2297428	1	treatment	Colo858	190219_IDG_24	72	8834	0.393654	0.33901	0.148616	0.0258515	0.0281794	0.06469	8162	672	0	672	0.0760697	1106.53	66.5542	8615.3	650.558	0.0701842	0.00588553	2	0.963821
106	I09	GSK2298859	1	treatment	Colo858	190219_IDG_23	72	9380	0.467704	0.33029	0.125127	0.0229963	0	0.0538834	8871	509	0	509	0.0542644	1106.53	66.5542	8615.3	650.558	0.0701842	-0.0159198	1	1.01985
106	I09	GSK2298859	1	treatment	Colo858	190219_IDG_24	72	9865	0.447954	0.339779	0.13256	0.0232034	0	0.0565045	9309	556	0	556	0.0563609	1106.53	66.5542	8615.3	650.558	0.0701842	-0.0138233	2	1.053
107	G09	GSK2328680	1	treatment	Colo858	190219_IDG_23	72	9117	0.453954	0.314017	0.143073	0.0247358	0.00627105	0.0579491	8611	506	0	506	0.0555007	1106.53	66.5542	8615.3	650.558	0.0701842	-0.0146835	1	0.999663
107	G09	GSK2328680	1	treatment	Colo858	190219_IDG_24	72	8984	0.458698	0.321784	0.136554	0.0263757	0	0.0565879	8341	643	0	643	0.0715717	1106.53	66.5542	8615.3	650.558	0.0701842	0.00138749	2	0.978263
108	J21	GSK2334470	1	treatment	Colo858	190219_IDG_23	72	9050	0.462627	0.327281	0.13287	0.0244046	0.00907805	0.0437397	8482	568	0	568	0.0627624	1106.53	66.5542	8615.3	650.558	0.0701842	-0.00742177	1	0.989495
108	J21	GSK2334470	1	treatment	Colo858	190219_IDG_24	72	9693	0.464223	0.32288	0.1303	0.021864	0	0.0607332	9056	637	0	637	0.0657175	1106.53	66.5542	8615.3	650.558	0.0701842	-0.00446667	2	1.03398
109	C04	GSK2336394	1	treatment	Colo858	190219_IDG_23	72	8919	0.460293	0.319594	0.142874	0.0262299	0.00834038	0.0426689	8273	646	0	646	0.0724296	1106.53	66.5542	8615.3	650.558	0.0701842	0.00224545	1	0.972801
109	C04	GSK2336394	1	treatment	Colo858	190219_IDG_24	72	9056	0.452947	0.340407	0.128062	0.024618	0	0.0539656	8246	810	0	810	0.0894435	1106.53	66.5542	8615.3	650.558	0.0701842	0.0192593	2	0.970624
110	C05	GSK2373690	1	treatment	Colo858	190219_IDG_23	72	8542	0.444738	0.296743	0.157802	0.0261537	0	0.0745631	7953	589	0	589	0.0689534	1106.53	66.5542	8615.3	650.558	0.0701842	-0.00123079	1	0.946692
110	C05	GSK2373690	1	treatment	Colo858	190219_IDG_24	72	8939	0.436462	0.329192	0.146512	0.0258334	0	0.0620002	8129	810	0	810	0.0906142	1106.53	66.5542	8615.3	650.558	0.0701842	0.02043	2	0.961136
111	G17	GSK2376236	1	treatment	Colo858	190219_IDG_23	72	9618	0.451549	0.335531	0.131949	0.0209844	0.00560316	0.0543837	9102	516	0	516	0.0536494	1106.53	66.5542	8615.3	650.558	0.0701842	-0.0165348	1	1.03747
111	G17	GSK2376236	1	treatment	Colo858	190219_IDG_24	72	8731	0.438042	0.318828	0.144286	0.0284474	0.0260366	0.0443587	8296	435	0	435	0.0498225	1106.53	66.5542	8615.3	650.558	0.0701842	-0.0203617	2	0.974652
112	F08	GSK237701A	1	treatment	Colo858	190219_IDG_23	72	720	0.206593	0.010989	0.345055	0.21978	0.101099	0.116484	455	265	0	265	0.368056	1106.53	66.5542	8615.3	650.558	0.0701842	0.297871	1	-0.259289
112	F08	GSK237701A	1	treatment	Colo858	190219_IDG_24	72	660	0.216749	0.0320197	0.403941	0.162562	0	0.184729	406	254	0	254	0.384848	1106.53	66.5542	8615.3	650.558	0.0701842	0.314664	2	-0.287252
113	J19	GSK2578215	1	treatment	Colo858	190219_IDG_23	72	9721	0.438884	0.341563	0.12965	0.0225864	0	0.0673162	9032	689	0	689	0.0708775	1106.53	66.5542	8615.3	650.558	0.0701842	0.000693285	1	1.03216
113	J19	GSK2578215	1	treatment	Colo858	190219_IDG_24	72	9089	0.454642	0.339948	0.134184	0.0178361	0	0.05339	8466	623	0	623	0.0685444	1106.53	66.5542	8615.3	650.558	0.0701842	-0.0016398	2	0.988227
114	L07	GSK2606414	1	treatment	Colo858	190219_IDG_23	72	8265	0.449321	0.302423	0.140302	0.0208043	0.0153495	0.0718001	7883	382	0	382	0.046219	1106.53	66.5542	8615.3	650.558	0.0701842	-0.0239652	1	0.940888
114	L07	GSK2606414	1	treatment	Colo858	190219_IDG_24	72	9052	0.455489	0.301615	0.145384	0.0214597	0.00955076	0.0665016	8481	571	0	571	0.06308	1106.53	66.5542	8615.3	650.558	0.0701842	-0.00710421	2	0.989416
115	F07	GSK2656157	1	treatment	Colo858	190219_IDG_23	72	8445	0.44252	0.322038	0.142947	0.0243474	0.00527108	0.0628765	7968	477	0	477	0.0564831	1106.53	66.5542	8615.3	650.558	0.0701842	-0.0137011	1	0.947931
115	F07	GSK2656157	1	treatment	Colo858	190219_IDG_24	72	8490	0.450424	0.314676	0.142966	0.0241864	0	0.0677472	7897	593	0	593	0.0698469	1106.53	66.5542	8615.3	650.558	0.0701842	-0.000337318	2	0.942051
116	C08	GSK270822A	1	treatment	Colo858	190219_IDG_23	72	9378	0.520999	0.310436	0.11253	0.0232424	0.0105857	0.0222069	8691	687	0	687	0.0732566	1106.53	66.5542	8615.3	650.558	0.0701842	0.00307236	1	1.00592
116	C08	GSK270822A	1	treatment	Colo858	190219_IDG_24	72	10122	0.499894	0.317844	0.120199	0.0229153	0.0138977	0.0252493	9426	696	0	696	0.0687611	1106.53	66.5542	8615.3	650.558	0.0701842	-0.00142308	2	1.06168
117	G21	GSK2850163	1	treatment	Colo858	190219_IDG_23	72	8997	0.446249	0.342539	0.132275	0.0241792	0	0.0547588	8437	560	0	560	0.062243	1106.53	66.5542	8615.3	650.558	0.0701842	-0.00794123	1	0.985924
117	G21	GSK2850163	1	treatment	Colo858	190219_IDG_24	72	9187	0.451151	0.334899	0.1314	0.026186	0	0.0563645	8516	671	0	671	0.073038	1106.53	66.5542	8615.3	650.558	0.0701842	0.00285379	2	0.992185
118	G20	GSK299115A	1	treatment	Colo858	190219_IDG_23	72	9687	0.510045	0.332089	0.105829	0.0192118	0	0.0328247	9109	578	0	578	0.0596676	1106.53	66.5542	8615.3	650.558	0.0701842	-0.0105166	1	1.038
118	G20	GSK299115A	1	treatment	Colo858	190219_IDG_24	72	9794	0.527202	0.313364	0.110427	0.0197539	0	0.029253	9264	530	0	530	0.0541148	1106.53	66.5542	8615.3	650.558	0.0701842	-0.0160694	2	1.04964
119	D11	GSK312879	1	treatment	Colo858	190219_IDG_23	72	8810	0.411223	0.321095	0.149435	0.0273821	0	0.0908644	8144	666	0	666	0.0755959	1106.53	66.5542	8615.3	650.558	0.0701842	0.00541172	1	0.962358
119	D11	GSK312879	1	treatment	Colo858	190219_IDG_24	72	8682	0.419708	0.336522	0.146866	0.027561	0	0.0693431	7946	736	0	736	0.0847731	1106.53	66.5542	8615.3	650.558	0.0701842	0.0145889	2	0.946113
120	D12	GSK336313	1	treatment	Colo858	190219_IDG_23	72	9359	0.42668	0.326312	0.144222	0.0241713	0.00966851	0.0689457	8688	671	0	671	0.0716957	1106.53	66.5542	8615.3	650.558	0.0701842	0.0015115	1	1.00568
120	D12	GSK336313	1	treatment	Colo858	190219_IDG_24	72	9341	0.423762	0.337798	0.143972	0.0301689	0	0.0642982	8585	756	0	756	0.0809335	1106.53	66.5542	8615.3	650.558	0.0701842	0.0107493	2	0.997622
121	D17	GSK461364	1	treatment	Colo858	190219_IDG_23	72	1207	0.270619	0.0373711	0.360825	0.155928	0	0.175258	776	431	0	431	0.357084	1106.53	66.5542	8615.3	650.558	0.0701842	0.286899	1	-0.112938
121	D17	GSK461364	1	treatment	Colo858	190219_IDG_24	72	1396	0.220513	0.00923077	0.364103	0.129231	0	0.276923	975	421	0	421	0.301576	1106.53	66.5542	8615.3	650.558	0.0701842	0.231392	2	-0.0418389
122	L10	GSK481	1	treatment	Colo858	190219_IDG_23	72	9424	0.442226	0.310972	0.144492	0.0224366	0.0194077	0.0604667	8914	510	0	510	0.0541171	1106.53	66.5542	8615.3	650.558	0.0701842	-0.016067	1	1.02316
122	L10	GSK481	1	treatment	Colo858	190219_IDG_24	72	9398	0.425381	0.326114	0.151382	0.0190637	0.013198	0.0648618	8865	533	0	533	0.0567142	1106.53	66.5542	8615.3	650.558	0.0701842	-0.01347	2	1.01939
123	I08	GSK579289A	1	treatment	Colo858	190219_IDG_23	72	697	0.319249	0.00938967	0.316901	0.204225	0	0.150235	426	271	0	271	0.388809	1106.53	66.5542	8615.3	650.558	0.0701842	0.318625	1	-0.275582
123	I08	GSK579289A	1	treatment	Colo858	190219_IDG_24	72	789	0.313609	0.00986193	0.323471	0.179487	0	0.17357	507	282	0	282	0.357414	1106.53	66.5542	8615.3	650.558	0.0701842	0.28723	2	-0.231716
124	D22	GSK583	1	treatment	Colo858	190219_IDG_23	72	9083	0.447831	0.333837	0.127486	0.025474	0.00628126	0.0590904	8597	486	0	486	0.0535066	1106.53	66.5542	8615.3	650.558	0.0701842	-0.0166776	1	0.998564
124	D22	GSK583	1	treatment	Colo858	190219_IDG_24	72	8603	0.427085	0.349455	0.130525	0.0287743	0.0179993	0.0461614	8167	436	0	436	0.05068	1106.53	66.5542	8615.3	650.558	0.0701842	-0.0195042	2	0.964228
125	M15	GSK840	1	treatment	Colo858	190219_IDG_23	72	9542	0.382802	0.347565	0.147565	0.0253758	0	0.0966927	8315	1227	0	1227	0.128589	1106.53	66.5542	8615.3	650.558	0.0701842	0.0584052	1	0.976178
125	M15	GSK840	1	treatment	Colo858	190219_IDG_24	72	9068	0.447142	0.317149	0.144343	0.0232002	0	0.0681655	8362	706	0	706	0.0778562	1106.53	66.5542	8615.3	650.558	0.0701842	0.007672	2	0.979944
126	M16	GSK843	1	treatment	Colo858	190219_IDG_23	72	9261	0.448494	0.32464	0.138025	0.0234608	0	0.0653805	8397	864	0	864	0.0932945	1106.53	66.5542	8615.3	650.558	0.0701842	0.0231103	1	0.982739
126	M16	GSK843	1	treatment	Colo858	190219_IDG_24	72	8705	0.452485	0.31664	0.152873	0.0179041	0	0.0600977	7987	718	0	718	0.0824813	1106.53	66.5542	8615.3	650.558	0.0701842	0.0122971	2	0.949498
127	J18	GSK872	1	treatment	Colo858	190219_IDG_23	72	9162	0.434536	0.349757	0.133472	0.0230164	0	0.0592181	8646	516	0	516	0.0563196	1106.53	66.5542	8615.3	650.558	0.0701842	-0.0138646	1	1.0024
127	J18	GSK872	1	treatment	Colo858	190219_IDG_24	72	8657	0.445987	0.342018	0.129778	0.0238417	0	0.0583753	8137	520	0	520	0.060067	1106.53	66.5542	8615.3	650.558	0.0701842	-0.0101172	2	0.961788
128	G18	GSK949675	1	treatment	Colo858	190219_IDG_23	72	9056	0.449615	0.339136	0.133925	0.0221433	0	0.0551806	8445	611	0	611	0.0674691	1106.53	66.5542	8615.3	650.558	0.0701842	-0.00271512	1	0.986559
128	G18	GSK949675	1	treatment	Colo858	190219_IDG_24	72	9250	0.448841	0.338678	0.12735	0.0268774	0	0.0582535	8669	581	0	581	0.0628108	1106.53	66.5542	8615.3	650.558	0.0701842	-0.00737339	2	1.0042
129	F06	GW276655	1	treatment	Colo858	190219_IDG_23	72	6594	0.408245	0.287582	0.189207	0.0383777	0.0532931	0.0232948	5967	627	0	627	0.0950864	1106.53	66.5542	8615.3	650.558	0.0701842	0.0249022	1	0.766671
129	F06	GW276655	1	treatment	Colo858	190219_IDG_24	72	6756	0.440364	0.268817	0.179653	0.0421836	0.0415219	0.0274607	6045	711	0	711	0.10524	1106.53	66.5542	8615.3	650.558	0.0701842	0.0350556	2	0.774437
130	L03	GW280670X	1	treatment	Colo858	190219_IDG_23	72	9110	0.486782	0.290448	0.146869	0.0236165	0.00610974	0.0461755	8511	599	0	599	0.0657519	1106.53	66.5542	8615.3	650.558	0.0701842	-0.00443228	1	0.99179
130	L03	GW280670X	1	treatment	Colo858	190219_IDG_24	72	8927	0.473684	0.297888	0.144647	0.0257787	0.0170665	0.0409357	8379	548	0	548	0.0613868	1106.53	66.5542	8615.3	650.558	0.0701842	-0.00879739	2	0.981302
131	I07	GW282449A	1	treatment	Colo858	190219_IDG_23	72	9330	0.448083	0.328047	0.14377	0.0225924	0	0.057508	8764	566	0	566	0.0606645	1106.53	66.5542	8615.3	650.558	0.0701842	-0.00951967	1	1.01159
131	I07	GW282449A	1	treatment	Colo858	190219_IDG_24	72	9704	0.439925	0.329696	0.140653	0.0220459	0.0169753	0.0507055	9072	632	0	632	0.0651278	1106.53	66.5542	8615.3	650.558	0.0701842	-0.00505641	2	1.0352
132	J22	GW282974X	1	treatment	Colo858	190219_IDG_23	72	9219	0.438768	0.34917	0.129728	0.0257149	0	0.056619	8672	547	0	547	0.059334	1106.53	66.5542	8615.3	650.558	0.0701842	-0.0108502	1	1.00444
132	J22	GW282974X	1	treatment	Colo858	190219_IDG_24	72	9014	0.45873	0.325702	0.138077	0.0200775	0	0.0574146	8517	497	0	497	0.0551365	1106.53	66.5542	8615.3	650.558	0.0701842	-0.0150477	2	0.992264
133	M09	GW296115X	1	treatment	Colo858	190219_IDG_23	72	12104	0.51166	0.302175	0.129588	0.0285349	0	0.0280429	10163	1941	0	1941	0.16036	1106.53	66.5542	8615.3	650.558	0.0701842	0.090176	1	1.11477
133	M09	GW296115X	1	treatment	Colo858	190219_IDG_24	72	10930	0.520945	0.29066	0.139667	0.0236162	0	0.0251122	9358	1572	0	1572	0.143824	1106.53	66.5542	8615.3	650.558	0.0701842	0.0736401	2	1.05664
134	F15	GW300657X	1	treatment	Colo858	190219_IDG_23	72	9537	0.437977	0.342082	0.134253	0.0228802	0.00897263	0.0538358	8916	621	0	621	0.0651148	1106.53	66.5542	8615.3	650.558	0.0701842	-0.00506938	1	1.02331
134	F15	GW300657X	1	treatment	Colo858	190219_IDG_24	72	9584	0.44706	0.329125	0.144661	0.0253611	0	0.0537928	8793	791	0	791	0.0825334	1106.53	66.5542	8615.3	650.558	0.0701842	0.0123492	2	1.01384
135	C15	GW300660X	1	treatment	Colo858	190219_IDG_23	72	8779	0.415042	0.327961	0.138806	0.0263618	0	0.0918291	8004	775	0	775	0.0882788	1106.53	66.5542	8615.3	650.558	0.0701842	0.0180947	1	0.950899
135	C15	GW300660X	1	treatment	Colo858	190219_IDG_24	72	9148	0.415403	0.337064	0.145487	0.0256318	0	0.076414	8310	838	0	838	0.0916047	1106.53	66.5542	8615.3	650.558	0.0701842	0.0214205	2	0.975777
136	H03	GW305074X (also GW5074)	1	treatment	Colo858	190219_IDG_23	72	8919	0.458446	0.339955	0.126131	0.0233925	0.0122252	0.0398495	8507	412	0	412	0.0461935	1106.53	66.5542	8615.3	650.558	0.0701842	-0.0239907	1	0.991473
136	H03	GW305074X (also GW5074)	1	treatment	Colo858	190219_IDG_24	72	9593	0.458904	0.333628	0.135219	0.0217631	0	0.0504861	9052	541	0	541	0.0563953	1106.53	66.5542	8615.3	650.558	0.0701842	-0.0137889	2	1.03368
137	E05	GW335962X	1	treatment	Colo858	190219_IDG_23	72	9962	0.461928	0.337575	0.133844	0.022541	0	0.0441113	9272	690	0	690	0.0692632	1106.53	66.5542	8615.3	650.558	0.0701842	-0.000920997	1	1.05024
137	E05	GW335962X	1	treatment	Colo858	190219_IDG_24	72	10004	0.460273	0.321702	0.145683	0.0227803	0	0.0495611	8999	1005	0	1005	0.10046	1106.53	66.5542	8615.3	650.558	0.0701842	0.0302756	2	1.02965
138	C12	GW406108X	1	treatment	Colo858	190219_IDG_23	72	10471	0.399648	0.355487	0.148962	0.0227398	0	0.0731627	9103	1368	0	1368	0.130647	1106.53	66.5542	8615.3	650.558	0.0701842	0.0604624	1	1.03754
138	C12	GW406108X	1	treatment	Colo858	190219_IDG_24	72	10446	0.402844	0.357281	0.149181	0.0325291	0	0.0581646	9284	1162	0	1162	0.111239	1106.53	66.5542	8615.3	650.558	0.0701842	0.0410546	2	1.05114
139	E17	GW412617	1	treatment	Colo858	190219_IDG_23	72	9461	0.443413	0.328115	0.13554	0.0275106	0.00715724	0.0582644	8942	519	0	519	0.0548568	1106.53	66.5542	8615.3	650.558	0.0701842	-0.0153274	1	1.0253
139	E17	GW412617	1	treatment	Colo858	190219_IDG_24	72	9128	0.438758	0.330464	0.137025	0.0262882	0.00744446	0.0600209	8597	531	0	531	0.0581727	1106.53	66.5542	8615.3	650.558	0.0701842	-0.0120115	2	0.998564
140	D06	GW416981X	1	treatment	Colo858	190219_IDG_23	72	6500	0.454623	0.244982	0.164351	0.0411734	0.0516384	0.0432321	5829	671	0	671	0.103231	1106.53	66.5542	8615.3	650.558	0.0701842	0.0330466	1	0.752765
140	D06	GW416981X	1	treatment	Colo858	190219_IDG_24	72	6592	0.468417	0.253514	0.162574	0.0392887	0.0335309	0.0426757	5905	687	0	687	0.104217	1106.53	66.5542	8615.3	650.558	0.0701842	0.034033	2	0.76045
141	G06	GW429374	1	treatment	Colo858	190219_IDG_23	72	10645	0.421623	0.353591	0.139638	0.024916	0	0.0602318	9231	1414	0	1414	0.132832	1106.53	66.5542	8615.3	650.558	0.0701842	0.0626481	1	1.04717
141	G06	GW429374	1	treatment	Colo858	190219_IDG_24	72	10638	0.423887	0.360043	0.14354	0.0239957	0	0.0485342	9210	1428	0	1428	0.134236	1106.53	66.5542	8615.3	650.558	0.0701842	0.0640516	2	1.0456
142	G07	GW429374A	1	treatment	Colo858	190219_IDG_23	72	9117	0.454076	0.32934	0.138008	0.0225511	0	0.0560254	8514	603	0	603	0.0661402	1106.53	66.5542	8615.3	650.558	0.0701842	-0.00404402	1	0.992027
142	G07	GW429374A	1	treatment	Colo858	190219_IDG_24	72	8987	0.43134	0.356	0.139006	0.0225057	0	0.0511494	8309	678	0	678	0.0754423	1106.53	66.5542	8615.3	650.558	0.0701842	0.00525811	2	0.975696
143	K05	GW434756X	1	treatment	Colo858	190219_IDG_23	72	9364	0.444822	0.330164	0.138766	0.0235427	0.0073571	0.055348	8835	529	0	529	0.056493	1106.53	66.5542	8615.3	650.558	0.0701842	-0.0136912	1	1.01708
143	K05	GW434756X	1	treatment	Colo858	190219_IDG_24	72	9165	0.420383	0.350455	0.134252	0.0248657	0.0259164	0.0441279	8566	599	0	599	0.0653573	1106.53	66.5542	8615.3	650.558	0.0701842	-0.00482686	2	0.996127
144	M19	GW435821X	1	treatment	Colo858	190219_IDG_23	72	7820	0.496634	0.267619	0.141915	0.0248661	0.0074186	0.0615469	7279	541	0	541	0.0691816	1106.53	66.5542	8615.3	650.558	0.0701842	-0.00100261	1	0.88933
144	M19	GW435821X	1	treatment	Colo858	190219_IDG_24	72	7808	0.514207	0.256966	0.133288	0.02814	0.00700069	0.0603981	7285	523	0	523	0.0669826	1106.53	66.5542	8615.3	650.558	0.0701842	-0.00320161	2	0.889856
145	H17	GW440135	1	treatment	Colo858	190219_IDG_23	72	8657	0.435256	0.317374	0.140007	0.0253899	0.0143876	0.0675855	8271	386	0	386	0.0445882	1106.53	66.5542	8615.3	650.558	0.0701842	-0.025596	1	0.97264
145	H17	GW440135	1	treatment	Colo858	190219_IDG_24	72	8872	0.444286	0.3133	0.138099	0.0276197	0.0142248	0.0624704	8436	436	0	436	0.0491434	1106.53	66.5542	8615.3	650.558	0.0701842	-0.0210408	2	0.985844
146	G08	GW440146	1	treatment	Colo858	190219_IDG_23	72	7769	0.436584	0.341007	0.140226	0.026929	0.00962746	0.0456258	7167	602	0	602	0.0774875	1106.53	66.5542	8615.3	650.558	0.0701842	0.00730325	1	0.879462
146	G08	GW440146	1	treatment	Colo858	190219_IDG_24	72	7327	0.446783	0.326513	0.137936	0.0291477	0.00956867	0.0500515	6793	534	0	534	0.0728811	1106.53	66.5542	8615.3	650.558	0.0701842	0.00269693	2	0.845748
147	H18	GW442130X	1	treatment	Colo858	190219_IDG_23	72	9369	0.469994	0.309478	0.134156	0.0274818	0.00773976	0.0511497	8915	454	0	454	0.0484577	1106.53	66.5542	8615.3	650.558	0.0701842	-0.0217265	1	1.02323
147	H18	GW442130X	1	treatment	Colo858	190219_IDG_24	72	8717	0.434878	0.341968	0.131704	0.026511	0.0183631	0.0465767	8223	494	0	494	0.0566709	1106.53	66.5542	8615.3	650.558	0.0701842	-0.0135133	2	0.968766
148	E16	GW513184X	1	treatment	Colo858	190219_IDG_23	72	8790	0.49781	0.307786	0.128832	0.0233577	0	0.0422141	8220	570	0	570	0.0648464	1106.53	66.5542	8615.3	650.558	0.0701842	-0.00533778	1	0.968524
148	E16	GW513184X	1	treatment	Colo858	190219_IDG_24	72	8667	0.484014	0.311073	0.123812	0.0277743	0.0238242	0.0295025	8101	566	0	566	0.0653052	1106.53	66.5542	8615.3	650.558	0.0701842	-0.00487902	2	0.958852
149	J08	GW525701	1	treatment	Colo858	190219_IDG_23	72	858	0.17052	0.0361272	0.419075	0.119942	0	0.254335	692	166	0	166	0.193473	1106.53	66.5542	8615.3	650.558	0.0701842	0.123289	1	-0.146606
149	J08	GW525701	1	treatment	Colo858	190219_IDG_24	72	924	0.138313	0.0262794	0.448133	0.124481	0	0.262794	723	201	0	201	0.217532	1106.53	66.5542	8615.3	650.558	0.0701842	0.147348	2	-0.133881
150	H14	GW560459	1	treatment	Colo858	190219_IDG_23	72	9134	0.45031	0.31501	0.141152	0.0227221	0.0136562	0.0571494	8714	420	0	420	0.045982	1106.53	66.5542	8615.3	650.558	0.0701842	-0.0242022	1	1.00771
150	H14	GW560459	1	treatment	Colo858	190219_IDG_24	72	9112	0.455466	0.334614	0.125626	0.023402	0.0111771	0.0497148	8589	523	0	523	0.0573968	1106.53	66.5542	8615.3	650.558	0.0701842	-0.0127874	2	0.997936
151	E15	GW569293E	1	treatment	Colo858	190219_IDG_23	72	9534	0.424115	0.335753	0.148593	0.0302858	0	0.0612523	8816	718	0	718	0.0753094	1106.53	66.5542	8615.3	650.558	0.0701842	0.00512522	1	1.01562
151	E15	GW569293E	1	treatment	Colo858	190219_IDG_24	72	9657	0.426153	0.337878	0.140991	0.027721	0	0.0672574	8802	855	0	855	0.0885368	1106.53	66.5542	8615.3	650.558	0.0701842	0.0183526	2	1.01453
152	D10	GW572399X	1	treatment	Colo858	190219_IDG_23	72	8106	0.457908	0.29418	0.154978	0.029829	0.0143179	0.048787	7543	563	0	563	0.0694547	1106.53	66.5542	8615.3	650.558	0.0701842	-0.000729472	1	0.912201
152	D10	GW572399X	1	treatment	Colo858	190219_IDG_24	72	8379	0.446014	0.299546	0.157745	0.0292936	0.0185353	0.0488658	7715	664	0	664	0.0792457	1106.53	66.5542	8615.3	650.558	0.0701842	0.00906154	2	0.926818
153	L22	GW576924A	1	treatment	Colo858	190219_IDG_23	72	9149	0.462108	0.320028	0.138609	0.0233715	0	0.0558834	8643	506	0	506	0.0553066	1106.53	66.5542	8615.3	650.558	0.0701842	-0.0148776	1	1.00217
153	L22	GW576924A	1	treatment	Colo858	190219_IDG_24	72	9223	0.455331	0.328876	0.135562	0.0205187	0.0111816	0.0485303	8675	548	0	548	0.0594167	1106.53	66.5542	8615.3	650.558	0.0701842	-0.0107675	2	1.00467
154	N13	GW578748X	1	treatment	Colo858	190219_IDG_23	72	9505	0.392869	0.330735	0.149146	0.0272842	0.0163934	0.0835722	8723	782	0	782	0.0822725	1106.53	66.5542	8615.3	650.558	0.0701842	0.0120883	1	1.00841
154	N13	GW578748X	1	treatment	Colo858	190219_IDG_24	72	8912	0.401744	0.322157	0.152051	0.0275117	0.0165807	0.0799558	8142	770	0	770	0.0864004	1106.53	66.5542	8615.3	650.558	0.0701842	0.0162162	2	0.962195
155	J07	GW580509X	1	treatment	Colo858	190219_IDG_23	72	9051	0.432986	0.331636	0.141605	0.0206015	0.0236798	0.0494909	8446	605	0	605	0.0668434	1106.53	66.5542	8615.3	650.558	0.0701842	-0.00334075	1	0.986639
155	J07	GW580509X	1	treatment	Colo858	190219_IDG_24	72	9552	0.456595	0.338557	0.128861	0.0197294	0	0.056257	8870	682	0	682	0.0713987	1106.53	66.5542	8615.3	650.558	0.0701842	0.00121446	2	1.01978
156	G16	GW621970X	1	treatment	Colo858	190219_IDG_23	72	8750	0.447798	0.340178	0.130381	0.0278328	0	0.05381	8084	666	0	666	0.0761143	1106.53	66.5542	8615.3	650.558	0.0701842	0.00593009	1	0.957463
156	G16	GW621970X	1	treatment	Colo858	190219_IDG_24	72	8867	0.443561	0.326105	0.14167	0.0274666	0.0134924	0.0477051	8301	566	0	566	0.0638322	1106.53	66.5542	8615.3	650.558	0.0701842	-0.00635201	2	0.975054
157	K15	GW632580X	1	treatment	Colo858	190219_IDG_23	72	9693	0.429853	0.318268	0.14321	0.0236627	0	0.0850062	8917	776	0	776	0.0800578	1106.53	66.5542	8615.3	650.558	0.0701842	0.00987358	1	1.02339
157	K15	GW632580X	1	treatment	Colo858	190219_IDG_24	72	9483	0.432865	0.341914	0.145384	0.020753	0	0.0590837	8818	665	0	665	0.0701255	1106.53	66.5542	8615.3	650.558	0.0701842	-5.87092e-05	2	1.01577
158	M05	GW642138X	1	treatment	Colo858	190219_IDG_23	72	8975	0.460073	0.312948	0.135834	0.0251676	0.00717394	0.0588028	8503	472	0	472	0.0525905	1106.53	66.5542	8615.3	650.558	0.0701842	-0.0175937	1	0.991157
158	M05	GW642138X	1	treatment	Colo858	190219_IDG_24	72	8784	0.438911	0.322988	0.151865	0.0209764	0	0.0652601	8152	632	0	632	0.071949	1106.53	66.5542	8615.3	650.558	0.0701842	0.0017648	2	0.963008
159	K17	GW651576X	1	treatment	Colo858	190219_IDG_23	72	9534	0.446038	0.323882	0.140872	0.0265606	0	0.0626471	8923	611	0	611	0.0640864	1106.53	66.5542	8615.3	650.558	0.0701842	-0.00609777	1	1.02385
159	K17	GW651576X	1	treatment	Colo858	190219_IDG_24	72	9701	0.450357	0.332748	0.137137	0.0190894	0	0.0606692	9115	586	0	586	0.0604061	1106.53	66.5542	8615.3	650.558	0.0701842	-0.00977805	2	1.03845
160	M06	GW683134A	1	treatment	Colo858	190219_IDG_23	72	8195	0.524268	0.276773	0.11529	0.0253741	0.0269356	0.0313598	7685	510	0	510	0.0622331	1106.53	66.5542	8615.3	650.558	0.0701842	-0.00795113	1	0.924284
160	M06	GW683134A	1	treatment	Colo858	190219_IDG_24	72	8397	0.52747	0.266129	0.123614	0.0226815	0.0230595	0.0370464	7936	461	0	461	0.0549006	1106.53	66.5542	8615.3	650.558	0.0701842	-0.0152836	2	0.945285
161	M04	GW684088	1	treatment	Colo858	190219_IDG_23	72	9819	0.475255	0.334166	0.130647	0.0231555	0	0.0367764	8810	1009	0	1009	0.10276	1106.53	66.5542	8615.3	650.558	0.0701842	0.0325758	1	1.01515
161	M04	GW684088	1	treatment	Colo858	190219_IDG_24	72	10011	0.441289	0.352922	0.130687	0.019954	0.018419	0.0367284	9121	890	0	890	0.0889022	1106.53	66.5542	8615.3	650.558	0.0701842	0.018718	2	1.0389
162	N09	GW693917A	1	treatment	Colo858	190219_IDG_23	72	8397	0.534199	0.24014	0.122941	0.0209685	0.027334	0.0544184	8012	385	0	385	0.0458497	1106.53	66.5542	8615.3	650.558	0.0701842	-0.0243345	1	0.951557
162	N09	GW693917A	1	treatment	Colo858	190219_IDG_24	72	8981	0.520797	0.248631	0.121752	0.0238844	0.0471863	0.037749	8583	398	0	398	0.0443158	1106.53	66.5542	8615.3	650.558	0.0701842	-0.0258684	2	0.997465
163	N04	GW709042A	1	treatment	Colo858	190219_IDG_23	72	9337	0.471253	0.304251	0.128523	0.0236018	0.00973154	0.0626398	8940	397	0	397	0.042519	1106.53	66.5542	8615.3	650.558	0.0701842	-0.0276652	1	1.02515
163	N04	GW709042A	1	treatment	Colo858	190219_IDG_24	72	9031	0.465143	0.308317	0.124812	0.0235472	0.0318989	0.0462823	8621	410	0	410	0.0453992	1106.53	66.5542	8615.3	650.558	0.0701842	-0.024785	2	1.00045
164	N12	GW770249X	1	treatment	Colo858	190219_IDG_23	72	7877	0.453791	0.292364	0.125357	0.0265414	0.0170137	0.0849326	7347	530	0	530	0.0672845	1106.53	66.5542	8615.3	650.558	0.0701842	-0.0028997	1	0.895273
164	N12	GW770249X	1	treatment	Colo858	190219_IDG_24	72	7831	0.44973	0.266537	0.153654	0.0234364	0.0273194	0.0793233	7211	620	0	620	0.0791725	1106.53	66.5542	8615.3	650.558	0.0701842	0.00898832	2	0.883351
165	J06	GW780159X	1	treatment	Colo858	190219_IDG_23	72	9711	0.518145	0.294825	0.113485	0.0224393	0.0181447	0.0329611	9314	397	0	397	0.0408815	1106.53	66.5542	8615.3	650.558	0.0701842	-0.0293027	1	1.05337
165	J06	GW780159X	1	treatment	Colo858	190219_IDG_24	72	8971	0.521987	0.2906	0.115984	0.023732	0.0173336	0.030363	8596	375	0	375	0.0418014	1106.53	66.5542	8615.3	650.558	0.0701842	-0.0283828	2	0.998486
166	J04	GW784752X	1	treatment	Colo858	190219_IDG_23	72	8218	0.459355	0.308334	0.130859	0.0310774	0.0228586	0.0475151	7787	431	0	431	0.0524459	1106.53	66.5542	8615.3	650.558	0.0701842	-0.0177383	1	0.932872
166	J04	GW784752X	1	treatment	Colo858	190219_IDG_24	72	7923	0.442904	0.312739	0.132541	0.0273267	0.0454125	0.0390759	7575	348	0	348	0.0439228	1106.53	66.5542	8615.3	650.558	0.0701842	-0.0262614	2	0.914937
167	L21	GW792479	1	treatment	Colo858	190219_IDG_23	72	8795	0.483407	0.32354	0.119424	0.0220055	0.00594742	0.0456762	8407	388	0	388	0.044116	1106.53	66.5542	8615.3	650.558	0.0701842	-0.0260682	1	0.983536
167	L21	GW792479	1	treatment	Colo858	190219_IDG_24	72	9206	0.494224	0.310767	0.12604	0.0196396	0	0.0493299	8656	550	0	550	0.0597436	1106.53	66.5542	8615.3	650.558	0.0701842	-0.0104406	2	1.00319
168	N10	GW807982X	1	treatment	Colo858	190219_IDG_23	72	7490	0.454198	0.283166	0.139176	0.0242107	0.0270423	0.0722073	7063	427	0	427	0.0570093	1106.53	66.5542	8615.3	650.558	0.0701842	-0.0131749	1	0.870206
168	N10	GW807982X	1	treatment	Colo858	190219_IDG_24	72	7474	0.454481	0.277473	0.133952	0.0275784	0.0500915	0.0564232	7107	367	0	367	0.0491036	1106.53	66.5542	8615.3	650.558	0.0701842	-0.0210806	2	0.874133
169	D08	GW810372X	1	treatment	Colo858	190219_IDG_23	72	7525	0.513029	0.245337	0.141393	0.0257725	0.0133846	0.061085	7023	502	0	502	0.066711	1106.53	66.5542	8615.3	650.558	0.0701842	-0.00347323	1	0.866622
169	D08	GW810372X	1	treatment	Colo858	190219_IDG_24	72	7688	0.505592	0.254729	0.136131	0.0312025	0.0249896	0.0473561	7243	445	0	445	0.0578824	1106.53	66.5542	8615.3	650.558	0.0701842	-0.0123018	2	0.886169
170	I15	GW811761X	1	treatment	Colo858	190219_IDG_23	72	7198	0.50264	0.257407	0.13875	0.0271341	0.0074802	0.0665884	6818	380	0	380	0.0527924	1106.53	66.5542	8615.3	650.558	0.0701842	-0.0173918	1	0.848039
170	I15	GW811761X	1	treatment	Colo858	190219_IDG_24	72	7250	0.497144	0.258825	0.150286	0.0287095	0.0083492	0.0566867	6827	423	0	423	0.0583448	1106.53	66.5542	8615.3	650.558	0.0701842	-0.0118394	2	0.848863
171	K04	GW814408X	1	treatment	Colo858	190219_IDG_23	72	3418	0.367507	0.121935	0.286444	0.0677793	0.0207766	0.135559	2936	482	0	482	0.141018	1106.53	66.5542	8615.3	650.558	0.0701842	0.0708339	1	0.390375
171	K04	GW814408X	1	treatment	Colo858	190219_IDG_24	72	3345	0.349725	0.134113	0.280261	0.0601788	0.0264787	0.149243	2908	437	0	437	0.130643	1106.53	66.5542	8615.3	650.558	0.0701842	0.0604586	2	0.385882
172	K09	GW830263A	1	treatment	Colo858	190219_IDG_23	72	9328	0.42981	0.319421	0.144144	0.0265709	0.00684229	0.0732125	8769	559	0	559	0.0599271	1106.53	66.5542	8615.3	650.558	0.0701842	-0.0102571	1	1.01198
172	K09	GW830263A	1	treatment	Colo858	190219_IDG_24	72	9580	0.411441	0.336848	0.138867	0.0264722	0.0316321	0.0547392	8915	665	0	665	0.0694154	1106.53	66.5542	8615.3	650.558	0.0701842	-0.000768748	2	1.02323
173	N16	GW830900A	1	treatment	Colo858	190219_IDG_23	72	9011	0.394812	0.339138	0.142028	0.019782	0.0107794	0.0934613	8442	569	0	569	0.063145	1106.53	66.5542	8615.3	650.558	0.0701842	-0.00703915	1	0.986321
173	N16	GW830900A	1	treatment	Colo858	190219_IDG_24	72	8926	0.39467	0.332931	0.149403	0.0259255	0.0449777	0.0520921	8293	633	0	633	0.0709164	1106.53	66.5542	8615.3	650.558	0.0701842	0.000732227	2	0.974411
174	N21	GW832467	1	treatment	Colo858	190219_IDG_23	72	10116	0.464233	0.334172	0.128383	0.0202433	0	0.0529683	9534	582	0	582	0.0575326	1106.53	66.5542	8615.3	650.558	0.0701842	-0.0126516	1	1.06963
174	N21	GW832467	1	treatment	Colo858	190219_IDG_24	72	9795	0.442958	0.322653	0.142488	0.0276995	0	0.0642019	8520	1275	0	1275	0.130168	1106.53	66.5542	8615.3	650.558	0.0701842	0.0599843	2	0.992501
175	E14	GW855857	1	treatment	Colo858	190219_IDG_23	72	8559	0.550937	0.256608	0.122472	0.0253133	0.00694875	0.0377218	8059	500	0	500	0.058418	1106.53	66.5542	8615.3	650.558	0.0701842	-0.0117662	1	0.955416
175	E14	GW855857	1	treatment	Colo858	190219_IDG_24	72	8279	0.536122	0.259592	0.125882	0.0238676	0.0247658	0.0297703	7793	486	0	486	0.0587027	1106.53	66.5542	8615.3	650.558	0.0701842	-0.0114815	2	0.933375
176	D03	GW867253	1	treatment	Colo858	190219_IDG_23	72	9148	0.435993	0.337314	0.137987	0.0255102	0.0062616	0.0569341	8624	524	0	524	0.0572803	1106.53	66.5542	8615.3	650.558	0.0701842	-0.0129039	1	1.00068
176	D03	GW867253	1	treatment	Colo858	190219_IDG_24	72	9466	0.447428	0.342509	0.127482	0.0231273	0.0100406	0.0494134	8864	602	0	602	0.063596	1106.53	66.5542	8615.3	650.558	0.0701842	-0.00658817	2	1.01932
177	D07	GW868318	1	treatment	Colo858	190219_IDG_23	72	9136	0.45384	0.32071	0.140421	0.0231683	0	0.0618605	8503	633	0	633	0.0692863	1106.53	66.5542	8615.3	650.558	0.0701842	-0.000897857	1	0.991157
177	D07	GW868318	1	treatment	Colo858	190219_IDG_24	72	8693	0.437183	0.331353	0.131823	0.0262409	0.0238891	0.0495111	8079	614	0	614	0.0706315	1106.53	66.5542	8615.3	650.558	0.0701842	0.000447346	2	0.957054
178	E11	HG-10-102-01	1	treatment	Colo858	190219_IDG_23	72	9027	0.415156	0.331212	0.14423	0.0266603	0	0.0827429	8327	700	0	700	0.0775451	1106.53	66.5542	8615.3	650.558	0.0701842	0.00736095	1	0.977141
178	E11	HG-10-102-01	1	treatment	Colo858	190219_IDG_24	72	9420	0.441409	0.33283	0.143571	0.0233667	0	0.0588235	8602	818	0	818	0.0868365	1106.53	66.5542	8615.3	650.558	0.0701842	0.0166523	2	0.998957
179	G11	HTH-01-015	1	treatment	Colo858	190219_IDG_23	72	9134	0.43528	0.339115	0.140649	0.0239528	0	0.0610029	8475	659	0	659	0.072148	1106.53	66.5542	8615.3	650.558	0.0701842	0.00196382	1	0.98894
179	G11	HTH-01-015	1	treatment	Colo858	190219_IDG_24	72	9102	0.44496	0.336189	0.13162	0.0248721	0	0.0623587	8403	699	0	699	0.0767963	1106.53	66.5542	8615.3	650.558	0.0701842	0.00661211	2	0.983217
180	H10	JH-II-127	1	treatment	Colo858	190219_IDG_23	72	6196	0.526867	0.177948	0.159979	0.040649	0.0437893	0.0507676	5732	464	0	464	0.074887	1106.53	66.5542	8615.3	650.558	0.0701842	0.00470283	1	0.742859
180	H10	JH-II-127	1	treatment	Colo858	190219_IDG_24	72	6562	0.563352	0.160126	0.164616	0.0422348	0.0159628	0.053708	6014	548	0	548	0.0835111	1106.53	66.5542	8615.3	650.558	0.0701842	0.0133269	2	0.771359
181	C10	JNK-IN-7	1	treatment	Colo858	190219_IDG_23	72	8176	0.376907	0.372721	0.13977	0.021607	0	0.0889939	7405	771	0	771	0.0943004	1106.53	66.5542	8615.3	650.558	0.0701842	0.0241162	1	0.900313
181	C10	JNK-IN-7	1	treatment	Colo858	190219_IDG_24	72	8511	0.375787	0.37931	0.136295	0.0247923	0.0112006	0.0726152	7946	565	0	565	0.0663847	1106.53	66.5542	8615.3	650.558	0.0701842	-0.00379952	2	0.946113
182	L11	K05908	1	treatment	Colo858	190219_IDG_23	72	9233	0.409387	0.336362	0.145819	0.0244584	0.0150245	0.0689495	8586	647	0	647	0.0700747	1106.53	66.5542	8615.3	650.558	0.0701842	-0.000109465	1	0.9977
182	L11	K05908	1	treatment	Colo858	190219_IDG_24	72	9870	0.43682	0.342681	0.135599	0.0226548	0	0.0622457	9093	777	0	777	0.0787234	1106.53	66.5542	8615.3	650.558	0.0701842	0.00853921	2	1.03679
183	D19	NVP-2	1	treatment	Colo858	190219_IDG_23	72	9235	0.449559	0.328066	0.126761	0.0240467	0	0.0715676	8733	502	0	502	0.0543584	1106.53	66.5542	8615.3	650.558	0.0701842	-0.0158258	1	1.00919
183	D19	NVP-2	1	treatment	Colo858	190219_IDG_24	72	9504	0.443586	0.332235	0.138848	0.0278377	0	0.0574935	8801	703	0	703	0.0739689	1106.53	66.5542	8615.3	650.558	0.0701842	0.00378466	2	1.01446
184	G10	NVS-PAK1-1	1	treatment	Colo858	190219_IDG_23	72	8852	0.428483	0.346025	0.147361	0.0257139	0	0.0524169	8089	763	0	763	0.0861952	1106.53	66.5542	8615.3	650.558	0.0701842	0.016011	1	0.957872
184	G10	NVS-PAK1-1	1	treatment	Colo858	190219_IDG_24	72	8965	0.442821	0.330739	0.13675	0.0267034	0.0120944	0.0508921	8351	614	0	614	0.0684886	1106.53	66.5542	8615.3	650.558	0.0701842	-0.00169563	2	0.979064
185	C06	PFE-PKIS 1	1	treatment	Colo858	190219_IDG_23	72	8481	0.454133	0.324597	0.138861	0.0223034	0	0.0601058	7936	545	0	545	0.0642613	1106.53	66.5542	8615.3	650.558	0.0701842	-0.00592291	1	0.945285
185	C06	PFE-PKIS 1	1	treatment	Colo858	190219_IDG_24	72	9245	0.421452	0.351685	0.135857	0.0246796	0.0135263	0.0528002	8428	817	0	817	0.0883721	1106.53	66.5542	8615.3	650.558	0.0701842	0.0181879	2	0.985208
186	E06	PFE-PKIS 12	1	treatment	Colo858	190219_IDG_23	72	8508	0.452303	0.338183	0.135121	0.0220142	0	0.0523785	7904	604	0	604	0.070992	1106.53	66.5542	8615.3	650.558	0.0701842	0.000807811	1	0.942632
186	E06	PFE-PKIS 12	1	treatment	Colo858	190219_IDG_24	72	9000	0.443683	0.337782	0.135039	0.0258325	0	0.0576641	8168	832	0	832	0.0924444	1106.53	66.5542	8615.3	650.558	0.0701842	0.0222602	2	0.964309
187	E07	PFE-PKIS 21 (PD 0325901)	1	treatment	Colo858	190219_IDG_23	72	301	0.87931	0.00574713	0.0229885	0.0862069	0	0.00574713	174	127	0	127	0.421927	1106.53	66.5542	8615.3	650.558	0.0701842	0.351743	1	-0.464628
187	E07	PFE-PKIS 21 (PD 0325901)	1	treatment	Colo858	190219_IDG_24	72	463	0.880546	0.00682594	0.0853242	0.0204778	0	0.00682594	293	170	0	170	0.367171	1106.53	66.5542	8615.3	650.558	0.0701842	0.296986	2	-0.361601
188	I11	PFE-PKIS 25	1	treatment	Colo858	190219_IDG_23	72	9877	0.416777	0.365079	0.130181	0.0233686	0	0.0645944	9072	805	0	805	0.0815025	1106.53	66.5542	8615.3	650.558	0.0701842	0.0113183	1	1.0352
188	I11	PFE-PKIS 25	1	treatment	Colo858	190219_IDG_24	72	10040	0.430133	0.365083	0.130317	0.0184003	0	0.0560667	9239	801	0	801	0.0797809	1106.53	66.5542	8615.3	650.558	0.0701842	0.00959668	2	1.04777
189	N20	PFE-PKIS 29	1	treatment	Colo858	190219_IDG_23	72	3182	0.635319	0.215256	0.092999	0.0233368	0	0.0330895	2871	311	0	311	0.0977373	1106.53	66.5542	8615.3	650.558	0.0701842	0.0275531	1	0.379901
189	N20	PFE-PKIS 29	1	treatment	Colo858	190219_IDG_24	72	3283	0.614333	0.214667	0.100333	0.0266667	0.0133333	0.0306667	3000	283	0	283	0.0862016	1106.53	66.5542	8615.3	650.558	0.0701842	0.0160174	2	0.400538
190	M17	PFE-PKIS 3	1	treatment	Colo858	190219_IDG_23	72	9184	0.423162	0.332094	0.139157	0.0223022	0.00894413	0.0743408	8609	575	0	575	0.0626089	1106.53	66.5542	8615.3	650.558	0.0701842	-0.00757531	1	0.999506
190	M17	PFE-PKIS 3	1	treatment	Colo858	190219_IDG_24	72	9128	0.419381	0.327612	0.147694	0.0225336	0.00945709	0.0733217	8565	563	0	563	0.0616784	1106.53	66.5542	8615.3	650.558	0.0701842	-0.00850584	2	0.996049
191	L12	PFE-PKIS 32	1	treatment	Colo858	190219_IDG_23	72	6326	0.636033	0.171405	0.104793	0.0216529	0.0390083	0.0271074	6050	276	0	276	0.0436295	1106.53	66.5542	8615.3	650.558	0.0701842	-0.0265547	1	0.774933
191	L12	PFE-PKIS 32	1	treatment	Colo858	190219_IDG_24	72	6427	0.675053	0.161337	0.0910566	0.0293783	0	0.0431748	6161	266	0	266	0.0413879	1106.53	66.5542	8615.3	650.558	0.0701842	-0.0287963	2	0.785865
192	I14	PFE-PKIS 34	1	treatment	Colo858	190219_IDG_23	72	9233	0.421253	0.349178	0.144865	0.0241839	0	0.0605194	8394	839	0	839	0.0908697	1106.53	66.5542	8615.3	650.558	0.0701842	0.0206855	1	0.982499
192	I14	PFE-PKIS 34	1	treatment	Colo858	190219_IDG_24	72	9433	0.39168	0.363949	0.149799	0.0245319	0	0.0700403	8438	995	0	995	0.105481	1106.53	66.5542	8615.3	650.558	0.0701842	0.0352966	2	0.986003
193	C13	PFE-PKIS 39	1	treatment	Colo858	190219_IDG_23	72	9286	0.436763	0.330492	0.138736	0.0231227	0	0.0708864	8563	723	0	723	0.0778591	1106.53	66.5542	8615.3	650.558	0.0701842	0.00767495	1	0.995891
193	C13	PFE-PKIS 39	1	treatment	Colo858	190219_IDG_24	72	9263	0.416481	0.346637	0.138866	0.024416	0.0138514	0.0597488	8519	744	0	744	0.0803196	1106.53	66.5542	8615.3	650.558	0.0701842	0.0101354	2	0.992422
194	E04	PFE-PKIS 40	1	treatment	Colo858	190219_IDG_23	72	5270	0.573108	0.242524	0.114663	0.0247474	0.00928026	0.0356775	4849	421	0	421	0.0798861	1106.53	66.5542	8615.3	650.558	0.0701842	0.00970195	1	0.647115
194	E04	PFE-PKIS 40	1	treatment	Colo858	190219_IDG_24	72	4644	0.530236	0.275274	0.117441	0.0263834	0.0102732	0.0403922	4283	361	0	361	0.0777347	1106.53	66.5542	8615.3	650.558	0.0701842	0.00755051	2	0.579496
195	H12	PFE-PKIS 41	1	treatment	Colo858	190219_IDG_23	72	9478	0.449551	0.33382	0.128202	0.0233708	0.00617978	0.0588764	8900	578	0	578	0.0609833	1106.53	66.5542	8615.3	650.558	0.0701842	-0.00920087	1	1.02208
195	H12	PFE-PKIS 41	1	treatment	Colo858	190219_IDG_24	72	9266	0.450207	0.322969	0.136989	0.0266177	0.0107848	0.0524323	8716	550	0	550	0.0593568	1106.53	66.5542	8615.3	650.558	0.0701842	-0.0108274	2	1.00787
196	F13	PFE-PKIS 44	1	treatment	Colo858	190219_IDG_23	72	6678	0.622754	0.204538	0.0983297	0.0242673	0.035613	0.0144973	6346	332	0	332	0.0497155	1106.53	66.5542	8615.3	650.558	0.0701842	-0.0204687	1	0.803799
196	F13	PFE-PKIS 44	1	treatment	Colo858	190219_IDG_24	72	6530	0.61429	0.199806	0.107986	0.0252182	0.0329777	0.019722	6186	344	0	344	0.0526799	1106.53	66.5542	8615.3	650.558	0.0701842	-0.0175043	2	0.788309
197	F19	SB-216385	1	treatment	Colo858	190219_IDG_23	72	9437	0.457066	0.338422	0.125379	0.0250309	0	0.0541026	8909	528	0	528	0.05595	1106.53	66.5542	8615.3	650.558	0.0701842	-0.0142342	1	1.02277
197	F19	SB-216385	1	treatment	Colo858	190219_IDG_24	72	9111	0.437301	0.345108	0.133993	0.0263747	0.0127164	0.0445072	8493	618	0	618	0.0678301	1106.53	66.5542	8615.3	650.558	0.0701842	-0.0023541	2	0.990366
198	G15	SB-219980	1	treatment	Colo858	190219_IDG_23	72	7499	0.512081	0.271867	0.129009	0.024728	0.0155433	0.0467712	7077	422	0	422	0.0562742	1106.53	66.5542	8615.3	650.558	0.0701842	-0.01391	1	0.871457
198	G15	SB-219980	1	treatment	Colo858	190219_IDG_24	72	7613	0.497193	0.274067	0.137104	0.0305922	0.00659557	0.0544485	7126	487	0	487	0.0639695	1106.53	66.5542	8615.3	650.558	0.0701842	-0.00621467	2	0.875824
199	N06	SB-242719	1	treatment	Colo858	190219_IDG_23	72	9707	0.441148	0.321161	0.13629	0.0229323	0.0264102	0.0520596	9201	506	0	506	0.0521273	1106.53	66.5542	8615.3	650.558	0.0701842	-0.0180569	1	1.04493
199	N06	SB-242719	1	treatment	Colo858	190219_IDG_24	72	9214	0.408669	0.339525	0.13909	0.0238505	0.0483889	0.040477	8721	493	0	493	0.0535055	1106.53	66.5542	8615.3	650.558	0.0701842	-0.0166787	2	1.00825
200	J10	SB-282975	1	treatment	Colo858	190219_IDG_23	72	9127	0.454472	0.31696	0.133689	0.0228221	0.00671918	0.0653383	8632	495	0	495	0.0542347	1106.53	66.5542	8615.3	650.558	0.0701842	-0.0159495	1	1.00131
200	J10	SB-282975	1	treatment	Colo858	190219_IDG_24	72	9343	0.450068	0.325124	0.140081	0.0170583	0.00881157	0.0588568	8852	491	0	491	0.0525527	1106.53	66.5542	8615.3	650.558	0.0701842	-0.0176315	2	1.01839
201	L17	SB-517081	1	treatment	Colo858	190219_IDG_23	72	9361	0.422151	0.352002	0.134596	0.0216722	0.00809855	0.0614806	8767	594	0	594	0.0634548	1106.53	66.5542	8615.3	650.558	0.0701842	-0.00672944	1	1.01183
201	L17	SB-517081	1	treatment	Colo858	190219_IDG_24	72	9584	0.440933	0.328434	0.133606	0.0216599	0.0102774	0.0650901	9049	535	0	535	0.0558222	1106.53	66.5542	8615.3	650.558	0.0701842	-0.014362	2	1.03345
202	E20	SB-590885	1	treatment	Colo858	190219_IDG_23	72	1962	0.782669	0.132774	0.0600978	0.0188679	0	0.0055905	1431	531	0	531	0.270642	1106.53	66.5542	8615.3	650.558	0.0701842	0.200458	1	0.0907313
202	E20	SB-590885	1	treatment	Colo858	190219_IDG_24	72	1820	0.779797	0.135174	0.056686	0.0225291	0	0.00581395	1376	444	0	444	0.243956	1106.53	66.5542	8615.3	650.558	0.0701842	0.173772	2	0.0763885
203	J03	SB-633825	1	treatment	Colo858	190219_IDG_23	72	9402	0.458301	0.327596	0.129039	0.0230983	0.0299833	0.0319822	9005	397	0	397	0.0422251	1106.53	66.5542	8615.3	650.558	0.0701842	-0.0279591	1	1.03011
203	J03	SB-633825	1	treatment	Colo858	190219_IDG_24	72	9402	0.477486	0.325903	0.121378	0.0246322	0.0117031	0.0388988	8972	430	0	430	0.045735	1106.53	66.5542	8615.3	650.558	0.0701842	-0.0244492	2	1.02759
204	I21	SB-693162/GW549034	1	treatment	Colo858	190219_IDG_23	72	9471	0.43578	0.348853	0.132913	0.0237385	0	0.0587156	8720	751	0	751	0.0792947	1106.53	66.5542	8615.3	650.558	0.0701842	0.00911049	1	1.00818
204	I21	SB-693162/GW549034	1	treatment	Colo858	190219_IDG_24	72	9921	0.452158	0.343781	0.132877	0.0216312	0	0.049553	9061	860	0	860	0.0866848	1106.53	66.5542	8615.3	650.558	0.0701842	0.0165006	2	1.03436
205	I20	SB-708998	1	treatment	Colo858	190219_IDG_23	72	8527	0.459921	0.330379	0.129163	0.0259592	0	0.0545777	7897	630	0	630	0.073883	1106.53	66.5542	8615.3	650.558	0.0701842	0.00369876	1	0.942051
205	I20	SB-708998	1	treatment	Colo858	190219_IDG_24	72	8949	0.445897	0.340838	0.137981	0.0237231	0	0.0515614	8262	687	0	687	0.0767684	1106.53	66.5542	8615.3	650.558	0.0701842	0.00658416	2	0.971915
206	N05	SB-710397	1	treatment	Colo858	190219_IDG_23	72	8879	0.414947	0.338671	0.136892	0.0245552	0.0162515	0.0686833	8430	449	0	449	0.0505688	1106.53	66.5542	8615.3	650.558	0.0701842	-0.0196154	1	0.985367
206	N05	SB-710397	1	treatment	Colo858	190219_IDG_24	72	8823	0.403214	0.321889	0.14804	0.0252009	0.0102264	0.0914293	8214	609	0	609	0.0690241	1106.53	66.5542	8615.3	650.558	0.0701842	-0.00116006	2	0.968038
207	D15	SB-725317	1	treatment	Colo858	190219_IDG_23	72	2406	0.407447	0.0636805	0.320022	0.0966001	0.0426336	0.0696168	1853	553	0	553	0.229842	1106.53	66.5542	8615.3	650.558	0.0701842	0.159658	1	0.190212
207	D15	SB-725317	1	treatment	Colo858	190219_IDG_24	72	2616	0.390172	0.0648649	0.318428	0.0894349	0.0727273	0.0643735	2035	581	0	581	0.222095	1106.53	66.5542	8615.3	650.558	0.0701842	0.151911	2	0.228476
208	N08	SB-732932	1	treatment	Colo858	190219_IDG_23	72	9491	0.427511	0.307727	0.150827	0.023282	0.0392532	0.0514003	8891	600	0	600	0.0632178	1106.53	66.5542	8615.3	650.558	0.0701842	-0.00696641	1	1.02139
208	N08	SB-732932	1	treatment	Colo858	190219_IDG_24	72	9967	0.432139	0.31396	0.141642	0.0270154	0.04316	0.0420837	9291	676	0	676	0.0678238	1106.53	66.5542	8615.3	650.558	0.0701842	-0.00236038	2	1.05166
209	L19	SB-733894	1	treatment	Colo858	190219_IDG_23	72	10368	0.48426	0.324156	0.129662	0.0230649	0	0.0388571	9625	743	0	743	0.0716628	1106.53	66.5542	8615.3	650.558	0.0701842	0.00147861	1	1.07628
209	L19	SB-733894	1	treatment	Colo858	190219_IDG_24	72	9892	0.484697	0.329173	0.129802	0.0162796	0	0.0400478	9214	678	0	678	0.0685402	1106.53	66.5542	8615.3	650.558	0.0701842	-0.00164396	2	1.0459
210	J11	SB-735464	1	treatment	Colo858	190219_IDG_23	72	8350	0.564721	0.229313	0.133074	0.0245136	0.007393	0.0409857	7710	640	0	640	0.0766467	1106.53	66.5542	8615.3	650.558	0.0701842	0.00646251	1	0.926396
210	J11	SB-735464	1	treatment	Colo858	190219_IDG_24	72	8174	0.558656	0.235948	0.129348	0.0306838	0.0101838	0.0351805	7561	613	0	613	0.0749939	1106.53	66.5542	8615.3	650.558	0.0701842	0.00480969	2	0.913741
211	K18	SB-742609	1	treatment	Colo858	190219_IDG_23	72	9509	0.480358	0.311969	0.128187	0.0232024	0	0.056283	8706	803	0	803	0.0844463	1106.53	66.5542	8615.3	650.558	0.0701842	0.0142621	1	1.00709
211	K18	SB-742609	1	treatment	Colo858	190219_IDG_24	72	8906	0.476053	0.338015	0.125315	0.0184852	0	0.0421318	8331	575	0	575	0.0645632	1106.53	66.5542	8615.3	650.558	0.0701842	-0.00562098	2	0.977462
212	F10	SB-747651A	1	treatment	Colo858	190219_IDG_23	72	9577	0.460851	0.327415	0.12715	0.0254742	0.00694751	0.0521614	9068	509	0	509	0.0531482	1106.53	66.5542	8615.3	650.558	0.0701842	-0.017036	1	1.03489
212	F10	SB-747651A	1	treatment	Colo858	190219_IDG_24	72	9180	0.446092	0.32954	0.131264	0.0236782	0.0335632	0.0358621	8700	480	0	480	0.0522876	1106.53	66.5542	8615.3	650.558	0.0701842	-0.0178966	2	1.00662
213	N19	SB-772077-B	1	treatment	Colo858	190219_IDG_23	72	10085	0.498394	0.345664	0.108901	0.0153352	0.00725313	0.0244534	9651	434	0	434	0.0430342	1106.53	66.5542	8615.3	650.558	0.0701842	-0.02715	1	1.07817
213	N19	SB-772077-B	1	treatment	Colo858	190219_IDG_24	72	9984	0.522996	0.317863	0.107177	0.0146674	0.015296	0.022001	9545	439	0	439	0.0439704	1106.53	66.5542	8615.3	650.558	0.0701842	-0.0262138	2	1.07043
214	J15	TH257	1	treatment	Colo858	190219_IDG_23	72	9386	0.439705	0.330913	0.14532	0.0271129	0	0.0569484	8815	571	0	571	0.0608353	1106.53	66.5542	8615.3	650.558	0.0701842	-0.00934891	1	1.01554
214	J15	TH257	1	treatment	Colo858	190219_IDG_24	72	8987	0.455574	0.327061	0.133278	0.0277513	0	0.0563364	8396	591	0	591	0.0657617	1106.53	66.5542	8615.3	650.558	0.0701842	-0.00442254	2	0.982659
215	M07	THZ1	1	treatment	Colo858	190219_IDG_23	72	446	0.440252	0.0503145	0.31761	0.081761	0	0.110063	318	128	0	128	0.286996	1106.53	66.5542	8615.3	650.558	0.0701842	0.216811	1	-0.343701
215	M07	THZ1	1	treatment	Colo858	190219_IDG_24	72	351	0.410788	0.033195	0.3361	0.124481	0	0.0954357	241	110	0	110	0.31339	1106.53	66.5542	8615.3	650.558	0.0701842	0.243206	2	-0.402367
216	J14	THZ531	1	treatment	Colo858	190219_IDG_23	72	5199	0.518769	0.229158	0.140332	0.0373199	0.0192056	0.0552161	4582	617	0	617	0.118677	1106.53	66.5542	8615.3	650.558	0.0701842	0.0484925	1	0.615908
216	J14	THZ531	1	treatment	Colo858	190219_IDG_24	72	4949	0.511457	0.227085	0.136801	0.0410174	0.0350596	0.0485793	4364	585	0	585	0.118206	1106.53	66.5542	8615.3	650.558	0.0701842	0.0480215	2	0.589522
217	K10	TPKI-100	1	treatment	Colo858	190219_IDG_23	72	9658	0.45169	0.31649	0.149539	0.0217367	0	0.060544	8787	871	0	871	0.0901843	1106.53	66.5542	8615.3	650.558	0.0701842	0.0200001	1	1.01337
217	K10	TPKI-100	1	treatment	Colo858	190219_IDG_24	72	9424	0.445302	0.337541	0.137447	0.0244273	0	0.0552828	8556	868	0	868	0.0921053	1106.53	66.5542	8615.3	650.558	0.0701842	0.0219211	2	0.99534
218	I19	TPKI-105	1	treatment	Colo858	190219_IDG_23	72	9670	0.447565	0.323303	0.141424	0.0259668	0	0.0617408	8973	697	0	697	0.0720786	1106.53	66.5542	8615.3	650.558	0.0701842	0.0018944	1	1.02767
218	I19	TPKI-105	1	treatment	Colo858	190219_IDG_24	72	9368	0.43428	0.349553	0.132242	0.0250744	0	0.0588505	8734	634	0	634	0.0676772	1106.53	66.5542	8615.3	650.558	0.0701842	-0.002507	2	1.00926
219	L18	TPKI-106	1	treatment	Colo858	190219_IDG_23	72	8746	0.44154	0.331881	0.135681	0.0208182	0.00835149	0.0617284	8262	484	0	484	0.0553396	1106.53	66.5542	8615.3	650.558	0.0701842	-0.0148446	1	0.971915
219	L18	TPKI-106	1	treatment	Colo858	190219_IDG_24	72	9052	0.442646	0.316598	0.147194	0.0233904	0.0115771	0.0585942	8465	587	0	587	0.0648475	1106.53	66.5542	8615.3	650.558	0.0701842	-0.00533665	2	0.988147
220	N17	TPKI-16	1	treatment	Colo858	190219_IDG_23	72	646	0.828157	0	0.10352	0.0538302	0	0.0144928	483	163	0	163	0.252322	1106.53	66.5542	8615.3	650.558	0.0701842	0.182138	1	-0.244197
220	N17	TPKI-16	1	treatment	Colo858	190219_IDG_24	72	400	0.917603	0	0.0449438	0.0337079	0	0.00374532	267	133	0	133	0.3325	1106.53	66.5542	8615.3	650.558	0.0701842	0.262316	2	-0.381326
221	N15	TPKI-24	1	treatment	Colo858	190219_IDG_23	72	766	0.191571	0.126437	0.340996	0.12069	0	0.218391	522	244	0	244	0.318538	1106.53	66.5542	8615.3	650.558	0.0701842	0.248354	1	-0.224113
221	N15	TPKI-24	1	treatment	Colo858	190219_IDG_24	72	847	0.244186	0.0149502	0.375415	0.142857	0	0.222591	602	245	0	245	0.289256	1106.53	66.5542	8615.3	650.558	0.0701842	0.219072	2	-0.185834
222	K11	TPKI-26	1	treatment	Colo858	190219_IDG_23	72	584	0.324397	0.00268097	0.353887	0.211796	0	0.107239	373	211	0	211	0.361301	1106.53	66.5542	8615.3	650.558	0.0701842	0.291117	1	-0.30737
222	K11	TPKI-26	1	treatment	Colo858	190219_IDG_24	72	654	0.314554	0	0.338028	0.215962	0	0.131455	426	228	0	228	0.348624	1106.53	66.5542	8615.3	650.558	0.0701842	0.27844	2	-0.275582
223	J12	TPKI-39	1	treatment	Colo858	190219_IDG_23	72	9405	0.42094	0.340141	0.133543	0.0248008	0.028953	0.0516216	8911	494	0	494	0.0525253	1106.53	66.5542	8615.3	650.558	0.0701842	-0.0176589	1	1.02293
223	J12	TPKI-39	1	treatment	Colo858	190219_IDG_24	72	9163	0.439712	0.335732	0.13102	0.0263433	0.0103284	0.0568643	8617	546	0	546	0.0595875	1106.53	66.5542	8615.3	650.558	0.0701842	-0.0105967	2	1.00013
224	K19	TPKI-58	1	treatment	Colo858	190219_IDG_23	72	9676	0.456365	0.329516	0.131184	0.0213452	0	0.0615898	8995	681	0	681	0.0703803	1106.53	66.5542	8615.3	650.558	0.0701842	0.000196126	1	1.02935
224	K19	TPKI-58	1	treatment	Colo858	190219_IDG_24	72	9553	0.435964	0.350208	0.136154	0.0259288	0	0.0517454	8909	644	0	644	0.0674134	1106.53	66.5542	8615.3	650.558	0.0701842	-0.00277082	2	1.02277
225	J13	TPKI-69	1	treatment	Colo858	190219_IDG_23	72	9475	0.442183	0.324275	0.143718	0.023195	0	0.0666288	8795	680	0	680	0.0717678	1106.53	66.5542	8615.3	650.558	0.0701842	0.00158361	1	1.01399
225	J13	TPKI-69	1	treatment	Colo858	190219_IDG_24	72	9089	0.435289	0.332902	0.143411	0.0205713	0	0.0678265	8507	582	0	582	0.0640334	1106.53	66.5542	8615.3	650.558	0.0701842	-0.00615075	2	0.991473
226	D13	TPKI-72	1	treatment	Colo858	190219_IDG_23	72	8787	0.419892	0.33415	0.145149	0.0247428	0	0.0760657	8164	623	0	623	0.0709002	1106.53	66.5542	8615.3	650.558	0.0701842	0.000715997	1	0.963984
226	D13	TPKI-72	1	treatment	Colo858	190219_IDG_24	72	9377	0.417549	0.337251	0.141627	0.0292098	0	0.0743629	8593	784	0	784	0.0836088	1106.53	66.5542	8615.3	650.558	0.0701842	0.0134246	2	0.99825
227	D21	TPKI-85	1	treatment	Colo858	190219_IDG_23	72	8791	0.44331	0.355207	0.124438	0.022603	0	0.0544416	8229	562	0	562	0.063929	1106.53	66.5542	8615.3	650.558	0.0701842	-0.00625518	1	0.969251
227	D21	TPKI-85	1	treatment	Colo858	190219_IDG_24	72	9374	0.438205	0.343613	0.143038	0.0238205	0	0.0513234	8690	684	0	684	0.0729678	1106.53	66.5542	8615.3	650.558	0.0701842	0.00278359	2	1.00584
228	H04	TPKI-91	1	treatment	Colo858	190219_IDG_23	72	8778	0.46098	0.32108	0.124673	0.0258149	0.0172496	0.0502022	8406	372	0	372	0.0423787	1106.53	66.5542	8615.3	650.558	0.0701842	-0.0278055	1	0.983456
228	H04	TPKI-91	1	treatment	Colo858	190219_IDG_24	72	9242	0.452817	0.320202	0.128836	0.0275996	0.0193541	0.051191	8732	510	0	510	0.0551829	1106.53	66.5542	8615.3	650.558	0.0701842	-0.0150013	2	1.00911
229	E19	TPKI-97	1	treatment	Colo858	190219_IDG_23	72	9410	0.458688	0.316854	0.131151	0.0235254	0	0.0697807	8799	611	0	611	0.0649309	1106.53	66.5542	8615.3	650.558	0.0701842	-0.00525327	1	1.0143
229	E19	TPKI-97	1	treatment	Colo858	190219_IDG_24	72	8962	0.432345	0.3317	0.138776	0.0248625	0.0237868	0.0485298	8366	596	0	596	0.066503	1106.53	66.5542	8615.3	650.558	0.0701842	-0.00368118	2	0.980264
230	E21	TX-85-1	1	treatment	Colo858	190219_IDG_23	72	8794	0.451242	0.336351	0.130674	0.0267955	0	0.054937	8173	621	0	621	0.0706163	1106.53	66.5542	8615.3	650.558	0.0701842	0.000432132	1	0.964715
230	E21	TX-85-1	1	treatment	Colo858	190219_IDG_24	72	8505	0.443964	0.34028	0.132656	0.0273189	0	0.0557814	7870	635	0	635	0.074662	1106.53	66.5542	8615.3	650.558	0.0701842	0.00447777	2	0.939806
231	H11	UNC-AA-1-0013 (SGC-AAK1-1)	1	treatment	Colo858	190219_IDG_23	72	8681	0.453377	0.316446	0.14048	0.0241067	0.00624082	0.059349	8172	509	0	509	0.0586338	1106.53	66.5542	8615.3	650.558	0.0701842	-0.0115504	1	0.964634
231	H11	UNC-AA-1-0013 (SGC-AAK1-1)	1	treatment	Colo858	190219_IDG_24	72	8645	0.473093	0.31263	0.126297	0.0258694	0.00866382	0.0534472	8195	450	0	450	0.0520532	1106.53	66.5542	8615.3	650.558	0.0701842	-0.018131	2	0.966499
232	K07	UNC-AA-1-0017	1	treatment	Colo858	190219_IDG_23	72	8963	0.444007	0.311127	0.15437	0.0211318	0	0.0693649	8376	587	0	587	0.0654915	1106.53	66.5542	8615.3	650.558	0.0701842	-0.00469273	1	0.981063
232	K07	UNC-AA-1-0017	1	treatment	Colo858	190219_IDG_24	72	8940	0.42678	0.334926	0.13999	0.023053	0.0281892	0.0470616	8372	568	0	568	0.0635347	1106.53	66.5542	8615.3	650.558	0.0701842	-0.00664952	2	0.980743
233	G14	VE-821	1	treatment	Colo858	190219_IDG_23	72	9321	0.552082	0.239474	0.132311	0.0242242	0	0.0519091	8669	652	0	652	0.0699496	1106.53	66.5542	8615.3	650.558	0.0701842	-0.000234621	1	1.0042
233	G14	VE-821	1	treatment	Colo858	190219_IDG_24	72	9172	0.532316	0.262805	0.131113	0.0238178	0	0.049948	8649	523	0	523	0.0570214	1106.53	66.5542	8615.3	650.558	0.0701842	-0.0131628	2	1.00264
234	E18	VE-822	1	treatment	Colo858	190219_IDG_23	72	6317	0.660193	0.105556	0.124303	0.0472893	0	0.0626583	5921	396	0	396	0.062688	1106.53	66.5542	8615.3	650.558	0.0701842	-0.00749621	1	0.762059
234	E18	VE-822	1	treatment	Colo858	190219_IDG_24	72	6646	0.636364	0.106484	0.137953	0.0468849	0.0251113	0.0472028	6292	354	0	354	0.0532651	1106.53	66.5542	8615.3	650.558	0.0701842	-0.0169191	2	0.798601
235	H13	Vertex 11e	1	treatment	Colo858	190219_IDG_23	72	3145	0.659059	0.244467	0.0719225	0.0152144	0.00311203	0.00622407	2892	253	0	253	0.0804452	1106.53	66.5542	8615.3	650.558	0.0701842	0.010261	1	0.383302
235	H13	Vertex 11e	1	treatment	Colo858	190219_IDG_24	72	3227	0.667335	0.236807	0.0748163	0.00601202	0	0.0150301	2994	233	0	233	0.0722033	1106.53	66.5542	8615.3	650.558	0.0701842	0.00201909	2	0.399591
236	F22	WZ4003	1	treatment	Colo858	190219_IDG_23	72	9268	0.443642	0.343997	0.128426	0.0256851	0	0.0582502	8721	547	0	547	0.0590203	1106.53	66.5542	8615.3	650.558	0.0701842	-0.0111639	1	1.00825
236	F22	WZ4003	1	treatment	Colo858	190219_IDG_24	72	8847	0.451275	0.342156	0.125481	0.0237007	0	0.0573869	8312	535	0	535	0.0604725	1106.53	66.5542	8615.3	650.558	0.0701842	-0.00971172	2	0.975937
237	I16	XMD-17-51	1	treatment	Colo858	190219_IDG_23	72	1788	0.0832321	0.0194411	0.166464	0.0467801	0	0.684083	1646	142	0	142	0.0794183	1106.53	66.5542	8615.3	650.558	0.0701842	0.00923415	1	0.143534
237	I16	XMD-17-51	1	treatment	Colo858	190219_IDG_24	72	1675	0.0710932	0.0187793	0.18444	0.0375587	0	0.688129	1491	184	0	184	0.109851	1106.53	66.5542	8615.3	650.558	0.0701842	0.0396665	2	0.105968
238	F14	XMD8-87	1	treatment	Colo858	190219_IDG_23	72	9610	0.443037	0.327457	0.132768	0.0252314	0.013442	0.0580652	9076	534	0	534	0.0555671	1106.53	66.5542	8615.3	650.558	0.0701842	-0.0146171	1	1.0355
238	F14	XMD8-87	1	treatment	Colo858	190219_IDG_24	72	9073	0.417863	0.338704	0.136369	0.0248687	0.0314069	0.0507881	8565	508	0	508	0.0559903	1106.53	66.5542	8615.3	650.558	0.0701842	-0.0141939	2	0.996049
239	C20	XMD8-92	1	treatment	Colo858	190219_IDG_23	72	8539	0.472153	0.299602	0.138488	0.026355	0	0.0634013	8044	495	0	495	0.0579693	1106.53	66.5542	8615.3	650.558	0.0701842	-0.0122149	1	0.954186
239	C20	XMD8-92	1	treatment	Colo858	190219_IDG_24	72	8366	0.432672	0.313567	0.142243	0.0280693	0.034897	0.0485523	7909	457	0	457	0.0546259	1106.53	66.5542	8615.3	650.558	0.0701842	-0.0155583	2	0.943047
0	H21	AH5015	1	treatment	DU145	190219_IDG_29	72	2570	0.414407	0.314852	0.197491	0.0186159	0	0.0546338	2471	99	0	99	0.0385214	630.615	14.6958	2805.8	93.5	0.0325273	0.00599409	1	0.88541
0	H21	AH5015	1	treatment	DU145	190219_IDG_30	72	2356	0.469201	0.310616	0.158585	0.0139799	0.00131062	0.0463084	2289	67	0	67	0.028438	630.615	14.6958	2805.8	93.5	0.0325273	-0.00408928	2	0.819605
1	H06	BI00007366	1	treatment	DU145	190219_IDG_29	72	1919	0.623276	0.177055	0.144512	0.0248207	0.00275786	0.0275786	1813	106	0	106	0.0552371	630.615	14.6958	2805.8	93.5	0.0325273	0.0227098	1	0.632914
1	H06	BI00007366	1	treatment	DU145	190219_IDG_30	72	1972	0.643554	0.15493	0.152763	0.0276273	0	0.0211268	1846	126	0	126	0.0638945	630.615	14.6958	2805.8	93.5	0.0325273	0.0313672	2	0.646649
2	I17	BI00009348	1	treatment	DU145	190219_IDG_29	72	2700	0.439787	0.317835	0.170351	0.0182927	0.00152439	0.0522104	2624	76	0	76	0.0281481	630.615	14.6958	2805.8	93.5	0.0325273	-0.00437917	1	0.938747
2	I17	BI00009348	1	treatment	DU145	190219_IDG_30	72	2929	0.480702	0.298596	0.153333	0.0192982	0	0.0480702	2850	79	0	79	0.0269717	630.615	14.6958	2805.8	93.5	0.0325273	-0.00555565	2	1.01457
3	M18	BI00036838	1	treatment	DU145	190219_IDG_29	72	2376	0.292526	0.398625	0.216065	0.0227663	0.000429553	0.0695876	2328	48	0	48	0.020202	630.615	14.6958	2805.8	93.5	0.0325273	-0.0123253	1	0.833936
3	M18	BI00036838	1	treatment	DU145	190219_IDG_30	72	2381	0.298746	0.420233	0.20147	0.0216169	0	0.0579334	2313	68	0	68	0.0285594	630.615	14.6958	2805.8	93.5	0.0325273	-0.00396788	2	0.828439
4	K06	BI00047804	1	treatment	DU145	190219_IDG_29	72	2857	0.473533	0.278358	0.167447	0.0234066	0.00288081	0.0543752	2777	80	0	80	0.0280014	630.615	14.6958	2805.8	93.5	0.0325273	-0.00452591	1	0.990442
4	K06	BI00047804	1	treatment	DU145	190219_IDG_30	72	3026	0.456647	0.300238	0.187691	0.0214213	0.00034002	0.033662	2941	85	0	85	0.0280899	630.615	14.6958	2805.8	93.5	0.0325273	-0.00443743	2	1.04419
5	G04	BI00113608	1	treatment	DU145	190219_IDG_29	72	1859	0.685498	0.139196	0.13046	0.0192196	0	0.0256261	1717	142	0	142	0.0763852	630.615	14.6958	2805.8	93.5	0.0325273	0.0438578	1	0.59218
5	G04	BI00113608	1	treatment	DU145	190219_IDG_30	72	2004	0.655531	0.16046	0.139102	0.0230011	0.00383352	0.0180723	1826	178	0	178	0.0888224	630.615	14.6958	2805.8	93.5	0.0325273	0.056295	2	0.63834
6	E10	BI00133844	1	treatment	DU145	190219_IDG_29	72	1800	0.704851	0.134424	0.116891	0.0181181	0	0.025716	1711	89	0	89	0.0494444	630.615	14.6958	2805.8	93.5	0.0325273	0.0169171	1	0.589594
6	E10	BI00133844	1	treatment	DU145	190219_IDG_30	72	1975	0.7163	0.124083	0.123519	0.0180485	0	0.0180485	1773	202	0	202	0.102278	630.615	14.6958	2805.8	93.5	0.0325273	0.0697512	2	0.616085
7	H15	BI00601000	1	treatment	DU145	190219_IDG_29	72	2832	0.455692	0.299352	0.175793	0.0306196	0.00108069	0.037464	2776	56	0	56	0.019774	630.615	14.6958	2805.8	93.5	0.0325273	-0.0127533	1	0.990109
7	H15	BI00601000	1	treatment	DU145	190219_IDG_30	72	2862	0.445516	0.301536	0.183994	0.0221508	0.0096463	0.0371561	2799	63	0	63	0.0220126	630.615	14.6958	2805.8	93.5	0.0325273	-0.0105147	2	0.997748
8	C21	BI00604564	1	treatment	DU145	190219_IDG_29	72	2309	0.489228	0.285009	0.159785	0.0233393	0	0.0426391	2228	81	0	81	0.0350801	630.615	14.6958	2805.8	93.5	0.0325273	0.00255281	1	0.796926
8	C21	BI00604564	1	treatment	DU145	190219_IDG_30	72	2651	0.43975	0.285994	0.184664	0.0223005	0	0.0672926	2556	95	0	95	0.0358355	630.615	14.6958	2805.8	93.5	0.0325273	0.00330822	2	0.915253
9	L14	BI00614644	1	treatment	DU145	190219_IDG_29	72	3374	0.474962	0.285888	0.172989	0.0176024	0.00091047	0.047648	3295	79	0	79	0.0234143	630.615	14.6958	2805.8	93.5	0.0325273	-0.00911297	1	1.15497
9	L14	BI00614644	1	treatment	DU145	190219_IDG_30	72	3340	0.460111	0.290971	0.170377	0.0185529	0.00896722	0.0510204	3234	106	0	106	0.0317365	630.615	14.6958	2805.8	93.5	0.0325273	-0.000790787	2	1.13635
10	G19	BI00645435	1	treatment	DU145	190219_IDG_29	72	2781	0.524203	0.238274	0.163602	0.0228893	0	0.0510319	2665	116	0	116	0.0417116	630.615	14.6958	2805.8	93.5	0.0325273	0.0091843	1	0.952755
10	G19	BI00645435	1	treatment	DU145	190219_IDG_30	72	2464	0.485182	0.292125	0.15326	0.0203218	0	0.0491109	2362	102	0	102	0.0413961	630.615	14.6958	2805.8	93.5	0.0325273	0.00886879	2	0.846324
11	F21	BI00801818	1	treatment	DU145	190219_IDG_29	72	2614	0.471215	0.292192	0.176656	0.023265	0	0.0366719	2536	78	0	78	0.0298393	630.615	14.6958	2805.8	93.5	0.0325273	-0.00268799	1	0.90828
11	F21	BI00801818	1	treatment	DU145	190219_IDG_30	72	2588	0.458152	0.287584	0.186831	0.0190401	0.000793336	0.0476002	2521	67	0	67	0.0258887	630.615	14.6958	2805.8	93.5	0.0325273	-0.0066386	2	0.90303
12	K14	BI00865461	1	treatment	DU145	190219_IDG_29	72	3176	0.418672	0.342316	0.169073	0.0182868	0.00256657	0.0490857	3117	59	0	59	0.0185768	630.615	14.6958	2805.8	93.5	0.0325273	-0.0139505	1	1.10011
12	K14	BI00865461	1	treatment	DU145	190219_IDG_30	72	3187	0.472481	0.305761	0.163502	0.0202768	0.000965562	0.0370132	3107	80	0	80	0.025102	630.615	14.6958	2805.8	93.5	0.0325273	-0.00742534	2	1.09698
13	K21	BI01125081	1	treatment	DU145	190219_IDG_29	72	3007	0.48549	0.278252	0.164561	0.0252646	0.00170707	0.0447252	2929	78	0	78	0.0259395	630.615	14.6958	2805.8	93.5	0.0325273	-0.00658784	1	1.04031
13	K21	BI01125081	1	treatment	DU145	190219_IDG_30	72	2594	0.433052	0.307197	0.18456	0.0253317	0	0.0498593	2487	107	0	107	0.041249	630.615	14.6958	2805.8	93.5	0.0325273	0.00872172	2	0.891069
14	K16	BI2536	1	treatment	DU145	190219_IDG_29	72	387	0.0932476	0.0514469	0.540193	0.0707395	0.0257235	0.21865	311	76	0	76	0.196382	630.615	14.6958	2805.8	93.5	0.0325273	0.163855	1	-0.279814
14	K16	BI2536	1	treatment	DU145	190219_IDG_30	72	406	0.130058	0.0260116	0.560694	0.0809249	0.0202312	0.182081	346	60	0	60	0.147783	630.615	14.6958	2805.8	93.5	0.0325273	0.115256	2	-0.243252
15	K08	BIBF0846CL	1	treatment	DU145	190219_IDG_29	72	3054	0.458515	0.301646	0.163923	0.0204904	0.00100773	0.0544172	2977	77	0	77	0.0252128	630.615	14.6958	2805.8	93.5	0.0325273	-0.00731448	1	1.05577
15	K08	BIBF0846CL	1	treatment	DU145	190219_IDG_30	72	3101	0.450149	0.318317	0.17423	0.0165618	0.000331236	0.0404107	3019	82	0	82	0.0264431	630.615	14.6958	2805.8	93.5	0.0325273	-0.00608423	2	1.06918
16	E09	BIBW3133BS	1	treatment	DU145	190219_IDG_29	72	1923	0.617401	0.184049	0.139989	0.0306748	0.00557724	0.022309	1793	130	0	130	0.0676027	630.615	14.6958	2805.8	93.5	0.0325273	0.0350754	1	0.624525
16	E09	BIBW3133BS	1	treatment	DU145	190219_IDG_30	72	2175	0.635859	0.188384	0.136869	0.0151515	0.0030303	0.0207071	1980	195	0	195	0.0896552	630.615	14.6958	2805.8	93.5	0.0325273	0.0571279	2	0.70111
17	K20	BIRB0876BS	1	treatment	DU145	190219_IDG_29	72	2953	0.476454	0.305055	0.155471	0.0207756	0.000692521	0.0415512	2888	65	0	65	0.0220115	630.615	14.6958	2805.8	93.5	0.0325273	-0.0105158	1	1.027
17	K20	BIRB0876BS	1	treatment	DU145	190219_IDG_30	72	3015	0.460801	0.28278	0.178706	0.0201986	0	0.0575145	2921	94	0	94	0.0311774	630.615	14.6958	2805.8	93.5	0.0325273	-0.00134987	2	1.03772
18	F11	BIRZ0518XX	1	treatment	DU145	190219_IDG_29	72	2958	0.474653	0.290278	0.16875	0.025	0.0100694	0.03125	2880	78	0	78	0.0263692	630.615	14.6958	2805.8	93.5	0.0325273	-0.00615815	1	1.02439
18	F11	BIRZ0518XX	1	treatment	DU145	190219_IDG_30	72	2773	0.481578	0.286193	0.164868	0.0249349	0.000744325	0.0416822	2687	86	0	86	0.0310133	630.615	14.6958	2805.8	93.5	0.0325273	-0.00151397	2	0.960223
19	F18	BMX-IN-1	1	treatment	DU145	190219_IDG_29	72	2781	0.43568	0.297825	0.195724	0.0239587	0	0.0468116	2713	68	0	68	0.0244516	630.615	14.6958	2805.8	93.5	0.0325273	-0.00807568	1	0.969008
19	F18	BMX-IN-1	1	treatment	DU145	190219_IDG_30	72	2968	0.448916	0.313037	0.169935	0.0199518	0.00722394	0.0409357	2907	61	0	61	0.0205526	630.615	14.6958	2805.8	93.5	0.0325273	-0.0119748	2	1.03318
20	F04	CA93.0	1	treatment	DU145	190219_IDG_29	72	2976	0.484251	0.273105	0.170993	0.0207684	0	0.0508827	2889	87	0	87	0.0292339	630.615	14.6958	2805.8	93.5	0.0325273	-0.00329344	1	1.02732
20	F04	CA93.0	1	treatment	DU145	190219_IDG_30	72	2858	0.482149	0.28929	0.164152	0.0202429	0	0.0441664	2717	141	0	141	0.0493352	630.615	14.6958	2805.8	93.5	0.0325273	0.0168079	2	0.970356
21	I04	CCT241533	1	treatment	DU145	190219_IDG_29	72	2769	0.474254	0.306716	0.167537	0.0152985	0	0.036194	2680	89	0	89	0.0321416	630.615	14.6958	2805.8	93.5	0.0325273	-0.000385746	1	0.957851
21	I04	CCT241533	1	treatment	DU145	190219_IDG_30	72	2571	0.466238	0.30426	0.161174	0.0249196	0.00120579	0.0422026	2488	83	0	83	0.0322832	630.615	14.6958	2805.8	93.5	0.0325273	-0.000244155	2	0.891422
22	D04	CCT244747	1	treatment	DU145	190219_IDG_29	72	2874	0.509292	0.275197	0.151179	0.0196569	0.00964975	0.035025	2798	76	0	76	0.026444	630.615	14.6958	2805.8	93.5	0.0325273	-0.00608333	1	0.997417
22	D04	CCT244747	1	treatment	DU145	190219_IDG_30	72	3172	0.479921	0.300856	0.15767	0.0243581	0	0.0371955	3038	134	0	134	0.0422446	630.615	14.6958	2805.8	93.5	0.0325273	0.00971733	2	1.07522
23	I18	CCT251545	1	treatment	DU145	190219_IDG_29	72	2716	0.501142	0.282344	0.163242	0.021309	0.00266362	0.0292998	2628	88	0	88	0.0324006	630.615	14.6958	2805.8	93.5	0.0325273	-0.000126724	1	0.940118
23	I18	CCT251545	1	treatment	DU145	190219_IDG_30	72	2744	0.483232	0.277439	0.18064	0.0201982	0	0.0384909	2624	120	0	120	0.0437318	630.615	14.6958	2805.8	93.5	0.0325273	0.0112045	2	0.938747
24	F03	CCT251921	1	treatment	DU145	190219_IDG_29	72	2421	0.499566	0.287077	0.158716	0.0182134	0	0.0364267	2306	115	0	115	0.047501	630.615	14.6958	2805.8	93.5	0.0325273	0.0149737	1	0.825868
24	F03	CCT251921	1	treatment	DU145	190219_IDG_30	72	2484	0.477138	0.290432	0.178662	0.0177815	0.00254022	0.0334462	2362	122	0	122	0.0491143	630.615	14.6958	2805.8	93.5	0.0325273	0.016587	2	0.846324
25	L06	D2202-1	1	treatment	DU145	190219_IDG_29	72	3169	0.488334	0.299741	0.159754	0.0168503	0.00129618	0.0340246	3086	83	0	83	0.0261912	630.615	14.6958	2805.8	93.5	0.0325273	-0.00633609	1	1.09038
25	L06	D2202-1	1	treatment	DU145	190219_IDG_30	72	3182	0.502614	0.278105	0.158824	0.0186275	0.00130719	0.0405229	3060	122	0	122	0.0383407	630.615	14.6958	2805.8	93.5	0.0325273	0.00581335	2	1.08219
26	C19	DDR1-IN-1	1	treatment	DU145	190219_IDG_29	72	3047	0.426296	0.312775	0.180956	0.0271095	0	0.0528634	2951	96	0	96	0.0315064	630.615	14.6958	2805.8	93.5	0.0325273	-0.00102091	1	1.04741
26	C19	DDR1-IN-1	1	treatment	DU145	190219_IDG_30	72	2854	0.483906	0.28932	0.165691	0.0234089	0.00109729	0.0365764	2734	120	0	120	0.0420463	630.615	14.6958	2805.8	93.5	0.0325273	0.00951894	2	0.976071
79	C17	ERK5-IN-1	1	treatment	DU145	190219_IDG_29	72	2328	0.499108	0.26851	0.171276	0.0276539	0	0.0334523	2242	86	0	86	0.0369416	630.615	14.6958	2805.8	93.5	0.0325273	0.00441427	1	0.80216
79	C17	ERK5-IN-1	1	treatment	DU145	190219_IDG_30	72	2800	0.436756	0.288318	0.196429	0.0260417	0.00223214	0.0502232	2688	112	0	112	0.04	630.615	14.6958	2805.8	93.5	0.0325273	0.00747269	2	0.960562
80	L04	FM-381	1	treatment	DU145	190219_IDG_29	72	2710	0.487373	0.280437	0.156804	0.022239	0.000753864	0.0523935	2653	57	0	57	0.0210332	630.615	14.6958	2805.8	93.5	0.0325273	-0.0114941	1	0.948667
80	L04	FM-381	1	treatment	DU145	190219_IDG_30	72	2905	0.480246	0.279087	0.176513	0.0170352	0	0.0471185	2759	146	0	146	0.0502582	630.615	14.6958	2805.8	93.5	0.0325273	0.0177309	2	0.984441
81	E08	GNF-5	1	treatment	DU145	190219_IDG_29	72	3210	0.457643	0.304777	0.173248	0.0187898	0.00286624	0.0426752	3140	70	0	70	0.0218069	630.615	14.6958	2805.8	93.5	0.0325273	-0.0107205	1	1.10729
81	E08	GNF-5	1	treatment	DU145	190219_IDG_30	72	3053	0.40605	0.317647	0.21042	0.0248739	0.00537815	0.0356303	2975	78	0	78	0.0255486	630.615	14.6958	2805.8	93.5	0.0325273	-0.00697867	2	1.05513
82	F17	GR269666A	1	treatment	DU145	190219_IDG_29	72	2856	0.472222	0.286436	0.182179	0.018759	0.0021645	0.0382395	2772	84	0	84	0.0294118	630.615	14.6958	2805.8	93.5	0.0325273	-0.00311555	1	0.988777
82	F17	GR269666A	1	treatment	DU145	190219_IDG_30	72	2746	0.467547	0.294717	0.16	0.0245283	0.00188679	0.0513208	2650	96	0	96	0.0349599	630.615	14.6958	2805.8	93.5	0.0325273	0.00243263	2	0.947643
83	M21	GSK1070916	1	treatment	DU145	190219_IDG_29	72	827	0.0595084	0.0970246	0.122898	0.0595084	0	0.661061	773	54	0	54	0.0652963	630.615	14.6958	2805.8	93.5	0.0325273	0.0327689	1	0.099145
83	M21	GSK1070916	1	treatment	DU145	190219_IDG_30	72	717	0.0795796	0.0885886	0.114114	0.0765766	0	0.641141	666	51	0	51	0.0711297	630.615	14.6958	2805.8	93.5	0.0325273	0.0386024	2	0.0256744
84	C16	GSK1122999	1	treatment	DU145	190219_IDG_29	72	2896	0.454872	0.295937	0.178713	0.0248112	0	0.045667	2781	115	0	115	0.0397099	630.615	14.6958	2805.8	93.5	0.0325273	0.00718263	1	0.991773
84	C16	GSK1122999	1	treatment	DU145	190219_IDG_30	72	2789	0.446349	0.299925	0.181818	0.023845	0	0.0480626	2684	105	0	105	0.0376479	630.615	14.6958	2805.8	93.5	0.0325273	0.00512059	2	0.959207
85	L15	GSK114	1	treatment	DU145	190219_IDG_29	72	2427	0.439024	0.332212	0.158537	0.0239697	0.000841043	0.0454163	2378	49	0	49	0.0201895	630.615	14.6958	2805.8	93.5	0.0325273	-0.0123378	1	0.852121
85	L15	GSK114	1	treatment	DU145	190219_IDG_30	72	2345	0.458352	0.301559	0.167483	0.0276169	0.0013363	0.0436526	2245	100	0	100	0.0426439	630.615	14.6958	2805.8	93.5	0.0325273	0.0101166	2	0.803279
86	M10	GSK1379710	1	treatment	DU145	190219_IDG_29	72	2849	0.436769	0.289474	0.186404	0.0233918	0	0.063962	2736	113	0	113	0.039663	630.615	14.6958	2805.8	93.5	0.0325273	0.00713573	1	0.976742
86	M10	GSK1379710	1	treatment	DU145	190219_IDG_30	72	2786	0.469562	0.296956	0.162584	0.0241277	0.00074239	0.0460282	2694	92	0	92	0.0330223	630.615	14.6958	2805.8	93.5	0.0325273	0.000494941	2	0.962593
87	M14	GSK1379712	1	treatment	DU145	190219_IDG_29	72	2922	0.475889	0.283351	0.170363	0.0186554	0.00246392	0.0492784	2841	81	0	81	0.0277207	630.615	14.6958	2805.8	93.5	0.0325273	-0.00480657	1	1.01161
87	M14	GSK1379712	1	treatment	DU145	190219_IDG_30	72	2842	0.441422	0.294523	0.185709	0.0261153	0.00145085	0.0507798	2757	85	0	85	0.0299085	630.615	14.6958	2805.8	93.5	0.0325273	-0.0026188	2	0.983772
88	H19	GSK1379761	1	treatment	DU145	190219_IDG_29	72	2850	0.485252	0.276978	0.168705	0.0223022	0	0.0467626	2780	70	0	70	0.0245614	630.615	14.6958	2805.8	93.5	0.0325273	-0.00796591	1	0.99144
88	H19	GSK1379761	1	treatment	DU145	190219_IDG_30	72	2750	0.460938	0.31994	0.15067	0.0197173	0.00372024	0.0450149	2688	62	0	62	0.0225455	630.615	14.6958	2805.8	93.5	0.0325273	-0.00998186	2	0.960562
89	H07	GSK1379762	1	treatment	DU145	190219_IDG_29	72	2852	0.503781	0.276197	0.166367	0.0212459	0.00252071	0.0298884	2777	75	0	75	0.0262973	630.615	14.6958	2805.8	93.5	0.0325273	-0.00622998	1	0.990442
89	H07	GSK1379762	1	treatment	DU145	190219_IDG_30	72	2911	0.486563	0.300212	0.149222	0.0194484	0.000707214	0.0438472	2828	83	0	83	0.0285125	630.615	14.6958	2805.8	93.5	0.0325273	-0.00401477	2	1.00733
90	H22	GSK1392956A	1	treatment	DU145	190219_IDG_29	72	2180	0.525891	0.246556	0.167221	0.0223278	0	0.0380048	2105	75	0	75	0.0344037	630.615	14.6958	2805.8	93.5	0.0325273	0.00187636	1	0.750161
90	H22	GSK1392956A	1	treatment	DU145	190219_IDG_30	72	2577	0.507031	0.260346	0.165528	0.0188831	0.00361591	0.0445962	2489	88	0	88	0.0341482	630.615	14.6958	2805.8	93.5	0.0325273	0.00162092	2	0.891775
91	H08	GSK1398477	1	treatment	DU145	190219_IDG_29	72	2290	0.489257	0.272158	0.165175	0.022829	0	0.0505819	2234	56	0	56	0.0244541	630.615	14.6958	2805.8	93.5	0.0325273	-0.00807316	1	0.799171
91	H08	GSK1398477	1	treatment	DU145	190219_IDG_30	72	2250	0.492707	0.275296	0.158614	0.0195989	0	0.053783	2194	56	0	56	0.0248889	630.615	14.6958	2805.8	93.5	0.0325273	-0.00763842	2	0.78414
92	J17	GSK1838705	1	treatment	DU145	190219_IDG_29	72	2514	0.570726	0.191472	0.165232	0.0229602	0.000820008	0.0487905	2439	75	0	75	0.0298329	630.615	14.6958	2805.8	93.5	0.0325273	-0.00269438	1	0.874033
92	J17	GSK1838705	1	treatment	DU145	190219_IDG_30	72	2335	0.545813	0.221394	0.147304	0.0219202	0.00482245	0.0587462	2281	54	0	54	0.0231263	630.615	14.6958	2805.8	93.5	0.0325273	-0.00940098	2	0.816649
93	L13	GSK1904529	1	treatment	DU145	190219_IDG_29	72	3048	0.454362	0.326709	0.156955	0.0181879	0.0023577	0.0414281	2969	79	0	79	0.0259186	630.615	14.6958	2805.8	93.5	0.0325273	-0.00660868	1	1.0532
93	L13	GSK1904529	1	treatment	DU145	190219_IDG_30	72	2800	0.420392	0.309198	0.208718	0.0192095	0.00110824	0.0413742	2707	93	0	93	0.0332143	630.615	14.6958	2805.8	93.5	0.0325273	0.000686972	2	0.966985
94	G05	GSK190937	1	treatment	DU145	190219_IDG_29	72	2599	0.467011	0.298092	0.161765	0.022655	0.0111288	0.0393482	2516	83	0	83	0.0319354	630.615	14.6958	2805.8	93.5	0.0325273	-0.000591954	1	0.901277
94	G05	GSK190937	1	treatment	DU145	190219_IDG_30	72	2757	0.495475	0.277149	0.170437	0.0180995	0	0.0388386	2652	105	0	105	0.0380849	630.615	14.6958	2805.8	93.5	0.0325273	0.00555756	2	0.948326
95	D18	GSK200398A	1	treatment	DU145	190219_IDG_29	72	1713	0.616044	0.192284	0.146356	0.016534	0	0.0287814	1633	80	0	80	0.0467017	630.615	14.6958	2805.8	93.5	0.0325273	0.0141744	1	0.555524
95	D18	GSK200398A	1	treatment	DU145	190219_IDG_30	72	2013	0.58266	0.214324	0.146473	0.0204631	0.00430802	0.0317717	1857	156	0	156	0.0774963	630.615	14.6958	2805.8	93.5	0.0325273	0.044969	2	0.651198
96	F12	GSK204607	1	treatment	DU145	190219_IDG_29	72	2987	0.43016	0.316539	0.174427	0.0277971	0.00833912	0.042738	2878	109	0	109	0.0364915	630.615	14.6958	2805.8	93.5	0.0325273	0.00396415	1	1.02374
96	F12	GSK204607	1	treatment	DU145	190219_IDG_30	72	3113	0.438851	0.295608	0.177365	0.0212838	0.0128378	0.0540541	2960	153	0	153	0.0491487	630.615	14.6958	2805.8	93.5	0.0325273	0.0166214	2	1.05031
97	M20	GSK204919	1	treatment	DU145	190219_IDG_29	72	2713	0.479174	0.291932	0.15985	0.0157598	0	0.0532833	2665	48	0	48	0.0176926	630.615	14.6958	2805.8	93.5	0.0325273	-0.0148347	1	0.952755
97	M20	GSK204919	1	treatment	DU145	190219_IDG_30	72	2984	0.484859	0.285272	0.163455	0.0203028	0	0.0461115	2906	78	0	78	0.0261394	630.615	14.6958	2805.8	93.5	0.0325273	-0.0063879	2	1.03285
98	M08	GSK2219385	1	treatment	DU145	190219_IDG_29	72	3068	0.494595	0.271622	0.170946	0.0209459	0	0.0418919	2960	108	0	108	0.0352021	630.615	14.6958	2805.8	93.5	0.0325273	0.00267477	1	1.05031
98	M08	GSK2219385	1	treatment	DU145	190219_IDG_30	72	2810	0.485618	0.289877	0.153157	0.0183041	0	0.0530445	2677	133	0	133	0.047331	630.615	14.6958	2805.8	93.5	0.0325273	0.0148036	2	0.956833
99	M11	GSK223675	1	treatment	DU145	190219_IDG_29	72	3097	0.455552	0.310634	0.163033	0.0187856	0.00201275	0.0499832	2981	116	0	116	0.0374556	630.615	14.6958	2805.8	93.5	0.0325273	0.00492829	1	1.05705
99	M11	GSK223675	1	treatment	DU145	190219_IDG_30	72	3017	0.444406	0.319793	0.173494	0.0199656	0	0.0423408	2905	112	0	112	0.037123	630.615	14.6958	2805.8	93.5	0.0325273	0.00459566	2	1.03253
100	L08	GSK2250882	1	treatment	DU145	190219_IDG_29	72	3321	0.44226	0.30344	0.186425	0.0175061	0.000921376	0.0494472	3256	65	0	65	0.0195724	630.615	14.6958	2805.8	93.5	0.0325273	-0.0129549	1	1.14309
100	L08	GSK2250882	1	treatment	DU145	190219_IDG_30	72	2912	0.461703	0.291414	0.164945	0.0245814	0.00178126	0.0555753	2807	105	0	105	0.0360577	630.615	14.6958	2805.8	93.5	0.0325273	0.00353038	2	1.0004
101	I05	GSK2269557	1	treatment	DU145	190219_IDG_29	72	2958	0.480293	0.282525	0.167771	0.0254622	0	0.0439484	2867	91	0	91	0.030764	630.615	14.6958	2805.8	93.5	0.0325273	-0.00176328	1	1.02014
101	I05	GSK2269557	1	treatment	DU145	190219_IDG_30	72	2609	0.461754	0.300761	0.171806	0.020024	0	0.0456548	2497	112	0	112	0.0429283	630.615	14.6958	2805.8	93.5	0.0325273	0.010401	2	0.894596
102	D14	GSK2283293	1	treatment	DU145	190219_IDG_29	72	3035	0.455666	0.289284	0.175282	0.0243067	0	0.0554605	2921	114	0	114	0.0375618	630.615	14.6958	2805.8	93.5	0.0325273	0.00503447	1	1.03772
102	D14	GSK2283293	1	treatment	DU145	190219_IDG_30	72	2727	0.489068	0.283468	0.165324	0.0237821	0	0.0383583	2607	120	0	120	0.0440044	630.615	14.6958	2805.8	93.5	0.0325273	0.0114771	2	0.932904
103	I10	GSK2288359	1	treatment	DU145	190219_IDG_29	72	2946	0.486957	0.284174	0.173565	0.0215652	0.0013913	0.0323478	2875	71	0	71	0.0241005	630.615	14.6958	2805.8	93.5	0.0325273	-0.00842684	1	1.02276
103	I10	GSK2288359	1	treatment	DU145	190219_IDG_30	72	3092	0.463918	0.286332	0.162953	0.026272	0	0.0605254	3007	85	0	85	0.0274903	630.615	14.6958	2805.8	93.5	0.0325273	-0.00503702	2	1.06536
104	I06	GSK2292767	1	treatment	DU145	190219_IDG_29	72	1955	0.579144	0.193583	0.16631	0.0235294	0	0.0374332	1870	85	0	85	0.0434783	630.615	14.6958	2805.8	93.5	0.0325273	0.0109509	1	0.656555
104	I06	GSK2292767	1	treatment	DU145	190219_IDG_30	72	2207	0.546318	0.20285	0.187648	0.0251781	0	0.0380048	2105	102	0	102	0.0462166	630.615	14.6958	2805.8	93.5	0.0325273	0.0136893	2	0.750161
105	C09	GSK2297428	1	treatment	DU145	190219_IDG_29	72	2905	0.476488	0.276635	0.176708	0.0180015	0	0.0521675	2722	183	0	183	0.0629948	630.615	14.6958	2805.8	93.5	0.0325273	0.0304675	1	0.972038
105	C09	GSK2297428	1	treatment	DU145	190219_IDG_30	72	2902	0.425037	0.314254	0.182422	0.0210487	0	0.0572378	2708	194	0	194	0.0668504	630.615	14.6958	2805.8	93.5	0.0325273	0.0343231	2	0.967322
106	I09	GSK2298859	1	treatment	DU145	190219_IDG_29	72	2392	0.496137	0.277682	0.166094	0.0180258	0.000429185	0.0416309	2330	62	0	62	0.0259197	630.615	14.6958	2805.8	93.5	0.0325273	-0.00660758	1	0.834667
106	I09	GSK2298859	1	treatment	DU145	190219_IDG_30	72	2463	0.495166	0.265237	0.179487	0.0197562	0	0.0403531	2379	84	0	84	0.0341048	630.615	14.6958	2805.8	93.5	0.0325273	0.00157744	2	0.852483
107	G09	GSK2328680	1	treatment	DU145	190219_IDG_29	72	2755	0.465446	0.268958	0.182294	0.0268958	0.00112066	0.0552858	2677	78	0	78	0.0283122	630.615	14.6958	2805.8	93.5	0.0325273	-0.00421515	1	0.956833
107	G09	GSK2328680	1	treatment	DU145	190219_IDG_30	72	2870	0.482033	0.26824	0.181488	0.0192377	0	0.0490018	2755	115	0	115	0.0400697	630.615	14.6958	2805.8	93.5	0.0325273	0.00754237	2	0.983104
108	J21	GSK2334470	1	treatment	DU145	190219_IDG_29	72	2225	0.522514	0.242495	0.164165	0.0173546	0	0.0534709	2132	93	0	93	0.0417978	630.615	14.6958	2805.8	93.5	0.0325273	0.00927044	1	0.760549
108	J21	GSK2334470	1	treatment	DU145	190219_IDG_30	72	2195	0.493908	0.273664	0.167291	0.0187441	0.00140581	0.0449859	2134	61	0	61	0.0277904	630.615	14.6958	2805.8	93.5	0.0325273	-0.00473688	2	0.761316
109	C04	GSK2336394	1	treatment	DU145	190219_IDG_29	72	2513	0.50483	0.276354	0.163377	0.0197396	0	0.0356993	2381	132	0	132	0.0525269	630.615	14.6958	2805.8	93.5	0.0325273	0.0199995	1	0.853206
109	C04	GSK2336394	1	treatment	DU145	190219_IDG_30	72	2346	0.482543	0.260519	0.187556	0.0174575	0	0.0519248	2234	112	0	112	0.0477408	630.615	14.6958	2805.8	93.5	0.0325273	0.0152135	2	0.799171
110	C05	GSK2373690	1	treatment	DU145	190219_IDG_29	72	2698	0.498834	0.266719	0.17535	0.0225505	0.00349922	0.0330482	2572	126	0	126	0.0467013	630.615	14.6958	2805.8	93.5	0.0325273	0.0141739	1	0.920811
110	C05	GSK2373690	1	treatment	DU145	190219_IDG_30	72	2446	0.480979	0.296021	0.16878	0.0249235	0.00174902	0.027547	2287	159	0	159	0.0650041	630.615	14.6958	2805.8	93.5	0.0325273	0.0324768	2	0.818867
111	G17	GSK2376236	1	treatment	DU145	190219_IDG_29	72	2363	0.507632	0.268644	0.162669	0.0152638	0	0.0457915	2293	70	0	70	0.0296234	630.615	14.6958	2805.8	93.5	0.0325273	-0.00290395	1	0.821081
111	G17	GSK2376236	1	treatment	DU145	190219_IDG_30	72	2356	0.508075	0.26364	0.167612	0.0270624	0.00567438	0.0279354	2291	65	0	65	0.0275891	630.615	14.6958	2805.8	93.5	0.0325273	-0.00493818	2	0.820343
112	F08	GSK237701A	1	treatment	DU145	190219_IDG_29	72	284	0.183246	0.0837696	0.272251	0.376963	0	0.0837696	191	93	0	93	0.327465	630.615	14.6958	2805.8	93.5	0.0325273	0.294937	1	-0.425711
112	F08	GSK237701A	1	treatment	DU145	190219_IDG_30	72	345	0.212121	0.0340909	0.193182	0.424242	0	0.136364	264	81	0	81	0.234783	630.615	14.6958	2805.8	93.5	0.0325273	0.202255	2	-0.332573
113	J19	GSK2578215	1	treatment	DU145	190219_IDG_29	72	2982	0.48768	0.283368	0.170089	0.0195072	0.00205339	0.0373032	2922	60	0	60	0.0201207	630.615	14.6958	2805.8	93.5	0.0325273	-0.0124066	1	1.03804
113	J19	GSK2578215	1	treatment	DU145	190219_IDG_30	72	2953	0.479189	0.257433	0.193424	0.0181882	0.00104932	0.050717	2859	94	0	94	0.031832	630.615	14.6958	2805.8	93.5	0.0325273	-0.000695278	2	1.01752
114	L07	GSK2606414	1	treatment	DU145	190219_IDG_29	72	2601	0.519124	0.252988	0.172908	0.0203187	0	0.0346614	2510	91	0	91	0.0349865	630.615	14.6958	2805.8	93.5	0.0325273	0.00245923	1	0.89917
114	L07	GSK2606414	1	treatment	DU145	190219_IDG_30	72	2848	0.490504	0.279766	0.159971	0.0186267	0	0.0511322	2738	110	0	110	0.0386236	630.615	14.6958	2805.8	93.5	0.0325273	0.00609628	2	0.977413
115	F07	GSK2656157	1	treatment	DU145	190219_IDG_29	72	2445	0.497698	0.267476	0.161574	0.0179992	0	0.0552532	2389	56	0	56	0.0229039	630.615	14.6958	2805.8	93.5	0.0325273	-0.00962343	1	0.856095
115	F07	GSK2656157	1	treatment	DU145	190219_IDG_30	72	2565	0.459023	0.299152	0.171175	0.0185709	0.000807428	0.0512717	2477	88	0	88	0.034308	630.615	14.6958	2805.8	93.5	0.0325273	0.00178068	2	0.887535
116	C08	GSK270822A	1	treatment	DU145	190219_IDG_29	72	3031	0.465636	0.275258	0.195876	0.0250859	0	0.0381443	2910	121	0	121	0.0399208	630.615	14.6958	2805.8	93.5	0.0325273	0.0073935	1	1.03415
116	C08	GSK270822A	1	treatment	DU145	190219_IDG_30	72	2824	0.478932	0.316027	0.150113	0.0180587	0	0.0368698	2658	166	0	166	0.0587819	630.615	14.6958	2805.8	93.5	0.0325273	0.0262546	2	0.950371
117	G21	GSK2850163	1	treatment	DU145	190219_IDG_29	72	2603	0.446885	0.307907	0.180911	0.0199681	0	0.0443291	2504	99	0	99	0.038033	630.615	14.6958	2805.8	93.5	0.0325273	0.00550573	1	0.897061
117	G21	GSK2850163	1	treatment	DU145	190219_IDG_30	72	2505	0.482002	0.282168	0.179148	0.0194456	0	0.0372362	2417	88	0	88	0.0351297	630.615	14.6958	2805.8	93.5	0.0325273	0.00260243	2	0.866165
118	G20	GSK299115A	1	treatment	DU145	190219_IDG_29	72	3022	0.446386	0.311408	0.17369	0.0229531	0	0.0455635	2919	103	0	103	0.0340834	630.615	14.6958	2805.8	93.5	0.0325273	0.00155608	1	1.03707
118	G20	GSK299115A	1	treatment	DU145	190219_IDG_30	72	3044	0.471545	0.29065	0.169377	0.0250678	0.000338753	0.0430217	2952	92	0	92	0.0302234	630.615	14.6958	2805.8	93.5	0.0325273	-0.00230392	2	1.04773
119	D11	GSK312879	1	treatment	DU145	190219_IDG_29	72	2775	0.491162	0.282813	0.156074	0.0218127	0	0.0481384	2659	116	0	116	0.0418018	630.615	14.6958	2805.8	93.5	0.0325273	0.00927449	1	0.950712
119	D11	GSK312879	1	treatment	DU145	190219_IDG_30	72	2878	0.441886	0.301907	0.184959	0.0172724	0	0.0539763	2779	99	0	99	0.0343989	630.615	14.6958	2805.8	93.5	0.0325273	0.00187157	2	0.991107
120	D12	GSK336313	1	treatment	DU145	190219_IDG_29	72	2980	0.459677	0.295933	0.180926	0.0255961	0.00385694	0.0340112	2852	128	0	128	0.042953	630.615	14.6958	2805.8	93.5	0.0325273	0.0104257	1	1.01523
120	D12	GSK336313	1	treatment	DU145	190219_IDG_30	72	3066	0.43531	0.284426	0.197017	0.0280957	0	0.0551509	2883	183	0	183	0.0596869	630.615	14.6958	2805.8	93.5	0.0325273	0.0271596	2	1.02537
121	D17	GSK461364	1	treatment	DU145	190219_IDG_29	72	373	0.144654	0.0220126	0.522013	0.113208	0.072327	0.125786	318	55	0	55	0.147453	630.615	14.6958	2805.8	93.5	0.0325273	0.114926	1	-0.272332
121	D17	GSK461364	1	treatment	DU145	190219_IDG_30	72	497	0.158442	0.0597403	0.516883	0.122078	0.0233766	0.119481	385	112	0	112	0.225352	630.615	14.6958	2805.8	93.5	0.0325273	0.192825	2	-0.204776
122	L10	GSK481	1	treatment	DU145	190219_IDG_29	72	3398	0.485542	0.287651	0.163554	0.0186747	0.00120482	0.0433735	3320	78	0	78	0.0229547	630.615	14.6958	2805.8	93.5	0.0325273	-0.00957263	1	1.16254
122	L10	GSK481	1	treatment	DU145	190219_IDG_30	72	3177	0.447221	0.284117	0.173298	0.0190727	0	0.0762907	3041	136	0	136	0.0428077	630.615	14.6958	2805.8	93.5	0.0325273	0.0102804	2	1.07617
123	I08	GSK579289A	1	treatment	DU145	190219_IDG_29	72	335	0.142857	0.0464286	0.471429	0.125	0.05	0.164286	280	55	0	55	0.164179	630.615	14.6958	2805.8	93.5	0.0325273	0.131652	1	-0.314086
123	I08	GSK579289A	1	treatment	DU145	190219_IDG_30	72	428	0.185841	0.0471976	0.483776	0.103245	0.0530973	0.126844	339	89	0	89	0.207944	630.615	14.6958	2805.8	93.5	0.0325273	0.175417	2	-0.2504
124	D22	GSK583	1	treatment	DU145	190219_IDG_29	72	2535	0.442041	0.313469	0.181224	0.0240816	0	0.0391837	2450	85	0	85	0.0335306	630.615	14.6958	2805.8	93.5	0.0325273	0.00100326	1	0.877953
124	D22	GSK583	1	treatment	DU145	190219_IDG_30	72	2554	0.450101	0.32	0.172525	0.0165657	0	0.0408081	2475	79	0	79	0.0309319	630.615	14.6958	2805.8	93.5	0.0325273	-0.00159544	2	0.886827
125	M15	GSK840	1	treatment	DU145	190219_IDG_29	72	3298	0.494403	0.280473	0.175062	0.0149254	0.00186567	0.0332711	3216	82	0	82	0.0248636	630.615	14.6958	2805.8	93.5	0.0325273	-0.00766376	1	1.13082
125	M15	GSK840	1	treatment	DU145	190219_IDG_30	72	3216	0.444444	0.300195	0.178687	0.0201429	0	0.0565302	3078	138	0	138	0.0429104	630.615	14.6958	2805.8	93.5	0.0325273	0.0103831	2	1.08786
126	M16	GSK843	1	treatment	DU145	190219_IDG_29	72	3127	0.451624	0.296223	0.173625	0.0222001	0.00265076	0.0536779	3018	109	0	109	0.0348577	630.615	14.6958	2805.8	93.5	0.0325273	0.00233038	1	1.06887
126	M16	GSK843	1	treatment	DU145	190219_IDG_30	72	3149	0.477109	0.287443	0.162525	0.0189666	0.000981033	0.0529758	3058	91	0	91	0.0288981	630.615	14.6958	2805.8	93.5	0.0325273	-0.00362925	2	1.08155
127	J18	GSK872	1	treatment	DU145	190219_IDG_29	72	3241	0.44746	0.330388	0.163143	0.0160934	0.00126223	0.0416535	3169	72	0	72	0.0222154	630.615	14.6958	2805.8	93.5	0.0325273	-0.0103119	1	1.1163
127	J18	GSK872	1	treatment	DU145	190219_IDG_30	72	2927	0.434155	0.311268	0.179225	0.0211268	0.00105634	0.053169	2840	87	0	87	0.0297233	630.615	14.6958	2805.8	93.5	0.0325273	-0.00280405	2	1.01128
128	G18	GSK949675	1	treatment	DU145	190219_IDG_29	72	2598	0.455777	0.290837	0.168924	0.0219124	0	0.0625498	2510	88	0	88	0.0338722	630.615	14.6958	2805.8	93.5	0.0325273	0.0013449	1	0.89917
128	G18	GSK949675	1	treatment	DU145	190219_IDG_30	72	2673	0.489101	0.262333	0.18088	0.0172084	0	0.050478	2615	58	0	58	0.0216985	630.615	14.6958	2805.8	93.5	0.0325273	-0.0108288	2	0.935656
129	F06	GW276655	1	treatment	DU145	190219_IDG_29	72	1840	0.384267	0.333899	0.182796	0.0254669	0.00113186	0.0724392	1767	73	0	73	0.0396739	630.615	14.6958	2805.8	93.5	0.0325273	0.0071466	1	0.613543
129	F06	GW276655	1	treatment	DU145	190219_IDG_30	72	2084	0.414804	0.302534	0.196721	0.0258321	0.000496771	0.0596125	2013	71	0	71	0.0340691	630.615	14.6958	2805.8	93.5	0.0325273	0.00154178	2	0.714217
130	L03	GW280670X	1	treatment	DU145	190219_IDG_29	72	2638	0.474656	0.283301	0.174067	0.0208251	0.0145383	0.032613	2545	93	0	93	0.035254	630.615	14.6958	2805.8	93.5	0.0325273	0.00272667	1	0.911421
130	L03	GW280670X	1	treatment	DU145	190219_IDG_30	72	2498	0.463374	0.287568	0.179154	0.0213478	0.00125576	0.0473001	2389	109	0	109	0.0436349	630.615	14.6958	2805.8	93.5	0.0325273	0.0111076	2	0.856095
131	I07	GW282449A	1	treatment	DU145	190219_IDG_29	72	2017	0.678999	0.154768	0.133403	0.0171965	0	0.0156331	1919	98	0	98	0.048587	630.615	14.6958	2805.8	93.5	0.0325273	0.0160597	1	0.676571
131	I07	GW282449A	1	treatment	DU145	190219_IDG_30	72	2026	0.629825	0.164992	0.1523	0.0200952	0	0.0327869	1891	135	0	135	0.0666338	630.615	14.6958	2805.8	93.5	0.0325273	0.0341064	2	0.665167
132	J22	GW282974X	1	treatment	DU145	190219_IDG_29	72	1866	0.614005	0.181134	0.151042	0.021412	0	0.0324074	1728	138	0	138	0.073955	630.615	14.6958	2805.8	93.5	0.0325273	0.0414277	1	0.596908
132	J22	GW282974X	1	treatment	DU145	190219_IDG_30	72	1866	0.587558	0.182028	0.171083	0.0236175	0	0.0357143	1736	130	0	130	0.0696677	630.615	14.6958	2805.8	93.5	0.0325273	0.0371404	2	0.600337
133	M09	GW296115X	1	treatment	DU145	190219_IDG_29	72	3104	0.520254	0.275527	0.148309	0.0210914	0	0.0348175	2987	117	0	117	0.0376933	630.615	14.6958	2805.8	93.5	0.0325273	0.00516599	1	1.05897
133	M09	GW296115X	1	treatment	DU145	190219_IDG_30	72	3017	0.497093	0.28343	0.164971	0.0218023	0	0.0327035	2752	265	0	265	0.0878356	630.615	14.6958	2805.8	93.5	0.0325273	0.0553083	2	0.982101
134	F15	GW300657X	1	treatment	DU145	190219_IDG_29	72	2934	0.436931	0.334268	0.158374	0.0224247	0.00981079	0.038192	2854	80	0	80	0.0272665	630.615	14.6958	2805.8	93.5	0.0325273	-0.00526078	1	1.01588
134	F15	GW300657X	1	treatment	DU145	190219_IDG_30	72	2854	0.444444	0.306365	0.170802	0.0222941	0.0118662	0.0442287	2781	73	0	73	0.0255781	630.615	14.6958	2805.8	93.5	0.0325273	-0.00694918	2	0.991773
135	C15	GW300660X	1	treatment	DU145	190219_IDG_29	72	2835	0.49117	0.274467	0.169242	0.0239146	0	0.0412068	2718	117	0	117	0.0412698	630.615	14.6958	2805.8	93.5	0.0325273	0.00874253	1	0.970692
135	C15	GW300660X	1	treatment	DU145	190219_IDG_30	72	2995	0.454769	0.303414	0.166491	0.0239352	0	0.0513904	2841	154	0	154	0.051419	630.615	14.6958	2805.8	93.5	0.0325273	0.0188917	2	1.01161
136	H03	GW305074X (also GW5074)	1	treatment	DU145	190219_IDG_29	72	2644	0.447151	0.320236	0.172102	0.0168959	0	0.0436149	2545	99	0	99	0.0374433	630.615	14.6958	2805.8	93.5	0.0325273	0.00491595	1	0.911421
136	H03	GW305074X (also GW5074)	1	treatment	DU145	190219_IDG_30	72	2819	0.464867	0.318787	0.144231	0.0240385	0.00924556	0.0388314	2704	115	0	115	0.0407946	630.615	14.6958	2805.8	93.5	0.0325273	0.00826729	2	0.965972
137	E05	GW335962X	1	treatment	DU145	190219_IDG_29	72	2807	0.460052	0.30026	0.174285	0.023783	0.0107767	0.0308436	2691	116	0	116	0.0413253	630.615	14.6958	2805.8	93.5	0.0325273	0.00879794	1	0.961578
137	E05	GW335962X	1	treatment	DU145	190219_IDG_30	72	2681	0.463909	0.316426	0.153336	0.0179477	0	0.0483808	2563	118	0	118	0.0440134	630.615	14.6958	2805.8	93.5	0.0325273	0.0114861	2	0.917687
138	C12	GW406108X	1	treatment	DU145	190219_IDG_29	72	2753	0.435303	0.321616	0.175393	0.0250561	0.00186986	0.0407629	2674	79	0	79	0.028696	630.615	14.6958	2805.8	93.5	0.0325273	-0.00383135	1	0.955814
138	C12	GW406108X	1	treatment	DU145	190219_IDG_30	72	2500	0.422056	0.347015	0.170398	0.0203151	0.00207297	0.0381426	2412	88	0	88	0.0352	630.615	14.6958	2805.8	93.5	0.0325273	0.00267269	2	0.864371
139	E17	GW412617	1	treatment	DU145	190219_IDG_29	72	2605	0.478918	0.297932	0.159905	0.0210819	0	0.0421639	2514	91	0	91	0.0349328	630.615	14.6958	2805.8	93.5	0.0325273	0.00240551	1	0.900575
139	E17	GW412617	1	treatment	DU145	190219_IDG_30	72	2665	0.458155	0.291553	0.189179	0.016738	0.00233554	0.0420397	2569	96	0	96	0.0360225	630.615	14.6958	2805.8	93.5	0.0325273	0.0034952	2	0.91977
140	D06	GW416981X	1	treatment	DU145	190219_IDG_29	72	1571	0.394947	0.275266	0.222739	0.0445479	0.00199468	0.0605053	1504	67	0	67	0.042648	630.615	14.6958	2805.8	93.5	0.0325273	0.0101207	1	0.497207
140	D06	GW416981X	1	treatment	DU145	190219_IDG_30	72	1590	0.422544	0.247858	0.226104	0.030323	0.000659196	0.0725115	1517	73	0	73	0.0459119	630.615	14.6958	2805.8	93.5	0.0325273	0.0133846	2	0.503202
141	G06	GW429374	1	treatment	DU145	190219_IDG_29	72	3030	0.45322	0.318983	0.170169	0.0186441	0	0.0389831	2950	80	0	80	0.0264026	630.615	14.6958	2805.8	93.5	0.0325273	-0.00612467	1	1.04709
141	G06	GW429374	1	treatment	DU145	190219_IDG_30	72	2959	0.414558	0.321664	0.207626	0.0235702	0.00034662	0.0322357	2885	74	0	74	0.0250084	630.615	14.6958	2805.8	93.5	0.0325273	-0.00751886	2	1.02602
142	G07	GW429374A	1	treatment	DU145	190219_IDG_29	72	2790	0.460037	0.305341	0.169061	0.0224678	0.00515654	0.0379374	2715	75	0	75	0.0268817	630.615	14.6958	2805.8	93.5	0.0325273	-0.00564559	1	0.969682
142	G07	GW429374A	1	treatment	DU145	190219_IDG_30	72	3002	0.453508	0.292776	0.182164	0.0286899	0.00622191	0.0366402	2893	109	0	109	0.0363091	630.615	14.6958	2805.8	93.5	0.0325273	0.00378181	2	1.02863
143	K05	GW434756X	1	treatment	DU145	190219_IDG_29	72	3018	0.480301	0.271668	0.179514	0.0222679	0.012333	0.0339157	2919	99	0	99	0.0328032	630.615	14.6958	2805.8	93.5	0.0325273	0.000275867	1	1.03707
143	K05	GW434756X	1	treatment	DU145	190219_IDG_30	72	2682	0.459734	0.313917	0.163409	0.0215012	0	0.0414386	2558	124	0	124	0.0462342	630.615	14.6958	2805.8	93.5	0.0325273	0.0137068	2	0.915949
144	M19	GW435821X	1	treatment	DU145	190219_IDG_29	72	3036	0.466396	0.300912	0.163458	0.0192503	0.00135089	0.0486322	2961	75	0	75	0.0247036	630.615	14.6958	2805.8	93.5	0.0325273	-0.00782376	1	1.05063
144	M19	GW435821X	1	treatment	DU145	190219_IDG_30	72	3032	0.467233	0.300849	0.177589	0.0162988	0	0.0380306	2945	87	0	87	0.0286939	630.615	14.6958	2805.8	93.5	0.0325273	-0.00383338	2	1.04548
145	H17	GW440135	1	treatment	DU145	190219_IDG_29	72	2849	0.483686	0.281463	0.161348	0.020796	0	0.0527071	2789	60	0	60	0.02106	630.615	14.6958	2805.8	93.5	0.0325273	-0.0114673	1	0.994431
145	H17	GW440135	1	treatment	DU145	190219_IDG_30	72	3071	0.452349	0.290604	0.186913	0.0268456	0.0144295	0.0288591	2980	91	0	91	0.029632	630.615	14.6958	2805.8	93.5	0.0325273	-0.00289527	2	1.05673
146	G08	GW440146	1	treatment	DU145	190219_IDG_29	72	1836	0.433877	0.28081	0.201463	0.0135059	0	0.0703433	1777	59	0	59	0.0321351	630.615	14.6958	2805.8	93.5	0.0325273	-0.000392237	1	0.617777
146	G08	GW440146	1	treatment	DU145	190219_IDG_30	72	2281	0.488068	0.280504	0.168843	0.0256641	0.000450248	0.0364701	2221	60	0	60	0.0263043	630.615	14.6958	2805.8	93.5	0.0325273	-0.00622306	2	0.794302
147	H18	GW442130X	1	treatment	DU145	190219_IDG_29	72	2683	0.453675	0.29977	0.172282	0.0206738	0.00114855	0.0524502	2612	71	0	71	0.0264629	630.615	14.6958	2805.8	93.5	0.0325273	-0.0060644	1	0.934625
147	H18	GW442130X	1	treatment	DU145	190219_IDG_30	72	2935	0.484742	0.278148	0.175026	0.0217468	0.00105226	0.0392845	2851	84	0	84	0.0286201	630.615	14.6958	2805.8	93.5	0.0325273	-0.00390721	2	1.0149
148	E16	GW513184X	1	treatment	DU145	190219_IDG_29	72	3069	0.453567	0.319987	0.166218	0.0181696	0	0.0420592	2972	97	0	97	0.0316064	630.615	14.6958	2805.8	93.5	0.0325273	-0.000920927	1	1.05416
148	E16	GW513184X	1	treatment	DU145	190219_IDG_30	72	2788	0.439043	0.309274	0.190726	0.026178	0	0.0347794	2674	114	0	114	0.0408895	630.615	14.6958	2805.8	93.5	0.0325273	0.00836221	2	0.955814
149	J08	GW525701	1	treatment	DU145	190219_IDG_29	72	494	0.199482	0.111399	0.362694	0.129534	0.0699482	0.126943	386	108	0	108	0.218623	630.615	14.6958	2805.8	93.5	0.0325273	0.186096	1	-0.203817
149	J08	GW525701	1	treatment	DU145	190219_IDG_30	72	441	0.185075	0.179104	0.283582	0.107463	0.0985075	0.146269	335	106	0	106	0.240363	630.615	14.6958	2805.8	93.5	0.0325273	0.207835	2	-0.25452
150	H14	GW560459	1	treatment	DU145	190219_IDG_29	72	2993	0.478127	0.296309	0.161312	0.0232399	0.00546822	0.0355434	2926	67	0	67	0.0223856	630.615	14.6958	2805.8	93.5	0.0325273	-0.0101417	1	1.03934
150	H14	GW560459	1	treatment	DU145	190219_IDG_30	72	3097	0.468854	0.281643	0.176938	0.0202121	0.00132538	0.0510272	3018	79	0	79	0.0255086	630.615	14.6958	2805.8	93.5	0.0325273	-0.00701876	2	1.06887
151	E15	GW569293E	1	treatment	DU145	190219_IDG_29	72	2805	0.465397	0.306481	0.157818	0.0238008	0	0.0465031	2731	74	0	74	0.0263815	630.615	14.6958	2805.8	93.5	0.0325273	-0.00614585	1	0.975063
151	E15	GW569293E	1	treatment	DU145	190219_IDG_30	72	2938	0.438851	0.311592	0.17866	0.0258773	0	0.0450195	2821	117	0	117	0.039823	630.615	14.6958	2805.8	93.5	0.0325273	0.0072957	2	1.00502
152	D10	GW572399X	1	treatment	DU145	190219_IDG_29	72	2603	0.424182	0.338388	0.165603	0.0259377	0.00957702	0.0363128	2506	97	0	97	0.0372647	630.615	14.6958	2805.8	93.5	0.0325273	0.00473738	1	0.897764
152	D10	GW572399X	1	treatment	DU145	190219_IDG_30	72	2443	0.452289	0.303808	0.171588	0.0231065	0	0.0492084	2337	106	0	106	0.0433893	630.615	14.6958	2805.8	93.5	0.0325273	0.010862	2	0.837224
153	L22	GW576924A	1	treatment	DU145	190219_IDG_29	72	2087	0.570917	0.201229	0.175115	0.0209933	0	0.031746	1953	134	0	134	0.064207	630.615	14.6958	2805.8	93.5	0.0325273	0.0316797	1	0.690299
153	L22	GW576924A	1	treatment	DU145	190219_IDG_30	72	2324	0.555456	0.220925	0.172429	0.0193085	0.000898069	0.0309834	2227	97	0	97	0.0417384	630.615	14.6958	2805.8	93.5	0.0325273	0.00921107	2	0.796551
154	N13	GW578748X	1	treatment	DU145	190219_IDG_29	72	3057	0.472617	0.284652	0.167681	0.0162272	0	0.0588235	2958	99	0	99	0.0323847	630.615	14.6958	2805.8	93.5	0.0325273	-0.000142623	1	1.04966
154	N13	GW578748X	1	treatment	DU145	190219_IDG_30	72	3032	0.445099	0.288535	0.183582	0.0228611	0	0.0599238	2887	145	0	145	0.0478232	630.615	14.6958	2805.8	93.5	0.0325273	0.0152959	2	1.02667
155	J07	GW580509X	1	treatment	DU145	190219_IDG_29	72	2987	0.447268	0.309781	0.167769	0.025409	0.0066133	0.0431605	2873	114	0	114	0.0381654	630.615	14.6958	2805.8	93.5	0.0325273	0.00563807	1	1.0221
155	J07	GW580509X	1	treatment	DU145	190219_IDG_30	72	3140	0.504771	0.276078	0.165844	0.0187562	0.000987167	0.0335637	3039	101	0	101	0.0321656	630.615	14.6958	2805.8	93.5	0.0325273	-0.000361708	2	1.07554
156	G16	GW621970X	1	treatment	DU145	190219_IDG_29	72	2806	0.47209	0.292594	0.177308	0.0204305	0.00145932	0.0361182	2741	65	0	65	0.0231646	630.615	14.6958	2805.8	93.5	0.0325273	-0.00936267	1	0.978418
156	G16	GW621970X	1	treatment	DU145	190219_IDG_30	72	2727	0.454409	0.296811	0.184991	0.0213884	0.00637899	0.0360225	2665	62	0	62	0.0227356	630.615	14.6958	2805.8	93.5	0.0325273	-0.00979171	2	0.952755
157	K15	GW632580X	1	treatment	DU145	190219_IDG_29	72	3035	0.4625	0.3125	0.165203	0.0179054	0.0128378	0.0290541	2960	75	0	75	0.0247117	630.615	14.6958	2805.8	93.5	0.0325273	-0.00781562	1	1.05031
157	K15	GW632580X	1	treatment	DU145	190219_IDG_30	72	3306	0.459047	0.291187	0.175023	0.0233572	0.000311429	0.0510744	3211	95	0	95	0.0287356	630.615	14.6958	2805.8	93.5	0.0325273	-0.00379168	2	1.12928
158	M05	GW642138X	1	treatment	DU145	190219_IDG_29	72	2888	0.511335	0.264843	0.155452	0.0187118	0	0.0496582	2779	109	0	109	0.0377424	630.615	14.6958	2805.8	93.5	0.0325273	0.00521507	1	0.991107
158	M05	GW642138X	1	treatment	DU145	190219_IDG_30	72	2797	0.444027	0.317055	0.187453	0.0157776	0.0052592	0.0304282	2662	135	0	135	0.048266	630.615	14.6958	2805.8	93.5	0.0325273	0.0157387	2	0.951733
159	K17	GW651576X	1	treatment	DU145	190219_IDG_29	72	3132	0.485761	0.302782	0.1473	0.0199673	0.00458265	0.0396072	3055	77	0	77	0.0245849	630.615	14.6958	2805.8	93.5	0.0325273	-0.00794238	1	1.08061
159	K17	GW651576X	1	treatment	DU145	190219_IDG_30	72	3342	0.443701	0.307973	0.17955	0.0209982	0.00395618	0.0438223	3286	56	0	56	0.0167564	630.615	14.6958	2805.8	93.5	0.0325273	-0.0157709	2	1.15223
160	M06	GW683134A	1	treatment	DU145	190219_IDG_29	72	2851	0.45623	0.317472	0.171086	0.0177988	0	0.0374137	2753	98	0	98	0.0343739	630.615	14.6958	2805.8	93.5	0.0325273	0.00184659	1	0.982436
160	M06	GW683134A	1	treatment	DU145	190219_IDG_30	72	3139	0.435855	0.346053	0.165789	0.0164474	0	0.0358553	3040	99	0	99	0.0315387	630.615	14.6958	2805.8	93.5	0.0325273	-0.000988607	2	1.07586
161	M04	GW684088	1	treatment	DU145	190219_IDG_29	72	3001	0.492879	0.2876	0.158736	0.0204932	0	0.0402918	2879	122	0	122	0.0406531	630.615	14.6958	2805.8	93.5	0.0325273	0.0081258	1	1.02406
161	M04	GW684088	1	treatment	DU145	190219_IDG_30	72	3160	0.489573	0.275737	0.157895	0.0294604	0.0102615	0.0370738	3021	139	0	139	0.0439873	630.615	14.6958	2805.8	93.5	0.0325273	0.01146	2	1.06982
162	N09	GW693917A	1	treatment	DU145	190219_IDG_29	72	3227	0.430952	0.308235	0.193848	0.0134572	0	0.0535085	3121	106	0	106	0.0328478	630.615	14.6958	2805.8	93.5	0.0325273	0.000320533	1	1.10136
162	N09	GW693917A	1	treatment	DU145	190219_IDG_30	72	3413	0.408966	0.323269	0.194267	0.0192132	0	0.0542848	3279	134	0	134	0.0392616	630.615	14.6958	2805.8	93.5	0.0325273	0.00673433	2	1.1501
163	N04	GW709042A	1	treatment	DU145	190219_IDG_29	72	2892	0.425259	0.313593	0.193007	0.0210489	0.00535141	0.041741	2803	89	0	89	0.0307746	630.615	14.6958	2805.8	93.5	0.0325273	-0.00175276	1	0.999074
163	N04	GW709042A	1	treatment	DU145	190219_IDG_30	72	3024	0.404902	0.331032	0.191232	0.0238177	0	0.0490162	2897	127	0	127	0.0419974	630.615	14.6958	2805.8	93.5	0.0325273	0.00947004	2	1.02993
164	N12	GW770249X	1	treatment	DU145	190219_IDG_29	72	3110	0.475963	0.285032	0.165701	0.0207978	0	0.052506	2933	177	0	177	0.0569132	630.615	14.6958	2805.8	93.5	0.0325273	0.0243859	1	1.0416
164	N12	GW770249X	1	treatment	DU145	190219_IDG_30	72	2762	0.428459	0.321541	0.175708	0.0176887	0	0.0566038	2544	218	0	218	0.0789283	630.615	14.6958	2805.8	93.5	0.0325273	0.046401	2	0.911072
165	J06	GW780159X	1	treatment	DU145	190219_IDG_29	72	2940	0.491655	0.288943	0.158206	0.0194715	0.00104312	0.0406815	2876	64	0	64	0.0217687	630.615	14.6958	2805.8	93.5	0.0325273	-0.0107586	1	1.02308
165	J06	GW780159X	1	treatment	DU145	190219_IDG_30	72	3219	0.482482	0.31244	0.148184	0.0186435	0	0.0382514	3111	108	0	108	0.0335508	630.615	14.6958	2805.8	93.5	0.0325273	0.00102348	2	1.09823
166	J04	GW784752X	1	treatment	DU145	190219_IDG_29	72	2900	0.427864	0.342645	0.171146	0.0176803	0.0053041	0.0353607	2828	72	0	72	0.0248276	630.615	14.6958	2805.8	93.5	0.0325273	-0.00769973	1	1.00733
166	J04	GW784752X	1	treatment	DU145	190219_IDG_30	72	2828	0.429459	0.307749	0.188231	0.0226608	0	0.0519006	2736	92	0	92	0.0325318	630.615	14.6958	2805.8	93.5	0.0325273	4.51115e-06	2	0.976742
167	L21	GW792479	1	treatment	DU145	190219_IDG_29	72	2856	0.430665	0.297355	0.191565	0.0221587	0.00893495	0.0493209	2798	58	0	58	0.0203081	630.615	14.6958	2805.8	93.5	0.0325273	-0.0122192	1	0.997417
167	L21	GW792479	1	treatment	DU145	190219_IDG_30	72	2873	0.446187	0.28938	0.186386	0.0253029	0.013186	0.0395581	2806	67	0	67	0.0233206	630.615	14.6958	2805.8	93.5	0.0325273	-0.00920674	2	1.00007
168	N10	GW807982X	1	treatment	DU145	190219_IDG_29	72	3024	0.483626	0.290934	0.161668	0.0151672	0	0.0486039	2901	123	0	123	0.0406746	630.615	14.6958	2805.8	93.5	0.0325273	0.00814729	1	1.03123
168	N10	GW807982X	1	treatment	DU145	190219_IDG_30	72	2975	0.439172	0.313949	0.175526	0.0221192	0	0.049233	2803	172	0	172	0.0578151	630.615	14.6958	2805.8	93.5	0.0325273	0.0252878	2	0.999074
169	D08	GW810372X	1	treatment	DU145	190219_IDG_29	72	2812	0.456681	0.301395	0.180984	0.0223935	0	0.0385463	2724	88	0	88	0.0312945	630.615	14.6958	2805.8	93.5	0.0325273	-0.00123286	1	0.972711
169	D08	GW810372X	1	treatment	DU145	190219_IDG_30	72	2996	0.436225	0.307985	0.18009	0.022468	0.00795022	0.0452817	2893	103	0	103	0.0343792	630.615	14.6958	2805.8	93.5	0.0325273	0.00185186	2	1.02863
170	I15	GW811761X	1	treatment	DU145	190219_IDG_29	72	3157	0.436934	0.333118	0.15815	0.0187581	0.00161708	0.051423	3092	65	0	65	0.0205892	630.615	14.6958	2805.8	93.5	0.0325273	-0.0119381	1	1.09227
170	I15	GW811761X	1	treatment	DU145	190219_IDG_30	72	3265	0.470496	0.289077	0.169492	0.0207156	0.00125549	0.0489642	3186	79	0	79	0.024196	630.615	14.6958	2805.8	93.5	0.0325273	-0.0083313	2	1.12157
171	K04	GW814408X	1	treatment	DU145	190219_IDG_29	72	2529	0.387084	0.339968	0.198619	0.0203087	0	0.0540211	2462	67	0	67	0.0264927	630.615	14.6958	2805.8	93.5	0.0325273	-0.00603463	1	0.882218
171	K04	GW814408X	1	treatment	DU145	190219_IDG_30	72	2400	0.420849	0.310167	0.193479	0.023166	0.00514801	0.04719	2331	69	0	69	0.02875	630.615	14.6958	2805.8	93.5	0.0325273	-0.00377731	2	0.835033
172	K09	GW830263A	1	treatment	DU145	190219_IDG_29	72	3223	0.457034	0.305538	0.1655	0.0194144	0.0124125	0.0401018	3142	81	0	81	0.0251319	630.615	14.6958	2805.8	93.5	0.0325273	-0.00739545	1	1.10791
172	K09	GW830263A	1	treatment	DU145	190219_IDG_30	72	3348	0.447255	0.318322	0.163171	0.0228254	0.00123381	0.0471931	3242	106	0	106	0.0316607	630.615	14.6958	2805.8	93.5	0.0325273	-0.000866621	2	1.1388
173	N16	GW830900A	1	treatment	DU145	190219_IDG_29	72	2961	0.442812	0.289612	0.18398	0.0213361	0.00209864	0.0601609	2859	102	0	102	0.0344478	630.615	14.6958	2805.8	93.5	0.0325273	0.00192051	1	1.01752
173	N16	GW830900A	1	treatment	DU145	190219_IDG_30	72	2914	0.434736	0.313916	0.177274	0.0194175	0	0.0546566	2781	133	0	133	0.0456417	630.615	14.6958	2805.8	93.5	0.0325273	0.0131144	2	0.991773
174	N21	GW832467	1	treatment	DU145	190219_IDG_29	72	2453	0.493734	0.263576	0.170008	0.0137845	0	0.0588972	2394	59	0	59	0.0240522	630.615	14.6958	2805.8	93.5	0.0325273	-0.00847513	1	0.857898
174	N21	GW832467	1	treatment	DU145	190219_IDG_30	72	2685	0.469796	0.299346	0.165833	0.0219315	0.00538669	0.0377068	2599	86	0	86	0.0320298	630.615	14.6958	2805.8	93.5	0.0325273	-0.000497518	2	0.930148
175	E14	GW855857	1	treatment	DU145	190219_IDG_29	72	2826	0.435148	0.300329	0.173548	0.0255754	0	0.0654001	2737	89	0	89	0.0314933	630.615	14.6958	2805.8	93.5	0.0325273	-0.00103404	1	0.977077
175	E14	GW855857	1	treatment	DU145	190219_IDG_30	72	2859	0.475728	0.286228	0.158936	0.021575	0	0.0575333	2781	78	0	78	0.0272823	630.615	14.6958	2805.8	93.5	0.0325273	-0.00524505	2	0.991773
176	D03	GW867253	1	treatment	DU145	190219_IDG_29	72	2878	0.464881	0.287835	0.180304	0.0170167	0	0.0499638	2762	116	0	116	0.0403058	630.615	14.6958	2805.8	93.5	0.0325273	0.00777845	1	0.985442
176	D03	GW867253	1	treatment	DU145	190219_IDG_30	72	3116	0.437915	0.336321	0.167331	0.0205843	0.000332005	0.0375166	3012	104	0	104	0.0333761	630.615	14.6958	2805.8	93.5	0.0325273	0.00084881	2	1.06696
177	D07	GW868318	1	treatment	DU145	190219_IDG_29	72	3421	0.491196	0.295689	0.15088	0.0212508	0.00273224	0.0382514	3294	127	0	127	0.0371236	630.615	14.6958	2805.8	93.5	0.0325273	0.00459633	1	1.15466
177	D07	GW868318	1	treatment	DU145	190219_IDG_30	72	2572	0.492108	0.288952	0.155807	0.0165925	0.000404694	0.0461352	2471	101	0	101	0.0392691	630.615	14.6958	2805.8	93.5	0.0325273	0.00674174	2	0.88541
178	E11	HG-10-102-01	1	treatment	DU145	190219_IDG_29	72	3194	0.469528	0.297837	0.167759	0.0203145	0	0.0445609	3052	142	0	142	0.0444584	630.615	14.6958	2805.8	93.5	0.0325273	0.011931	1	1.07966
178	E11	HG-10-102-01	1	treatment	DU145	190219_IDG_30	72	2785	0.44592	0.322581	0.16926	0.0273245	0.00113852	0.0337761	2635	150	0	150	0.05386	630.615	14.6958	2805.8	93.5	0.0325273	0.0213327	2	0.942516
179	G11	HTH-01-015	1	treatment	DU145	190219_IDG_29	72	2851	0.46949	0.297918	0.163676	0.0222541	0.00251256	0.0441493	2786	65	0	65	0.022799	630.615	14.6958	2805.8	93.5	0.0325273	-0.0097283	1	0.993435
179	G11	HTH-01-015	1	treatment	DU145	190219_IDG_30	72	3192	0.45882	0.290532	0.177367	0.0246433	0.00129702	0.0473411	3084	108	0	108	0.0338346	630.615	14.6958	2805.8	93.5	0.0325273	0.00130727	2	1.08975
180	H10	JH-II-127	1	treatment	DU145	190219_IDG_29	72	2338	0.481432	0.241163	0.186577	0.0375839	0	0.0532438	2235	103	0	103	0.0440547	630.615	14.6958	2805.8	93.5	0.0325273	0.0115274	1	0.799545
180	H10	JH-II-127	1	treatment	DU145	190219_IDG_30	72	2537	0.472268	0.266721	0.179038	0.0362969	0.000815661	0.0448613	2452	85	0	85	0.0335041	630.615	14.6958	2805.8	93.5	0.0325273	0.000976825	2	0.878664
181	C10	JNK-IN-7	1	treatment	DU145	190219_IDG_29	72	2455	0.554859	0.0783699	0.248097	0.0721003	0	0.0465741	2233	222	0	222	0.0904277	630.615	14.6958	2805.8	93.5	0.0325273	0.0579004	1	0.798797
181	C10	JNK-IN-7	1	treatment	DU145	190219_IDG_30	72	2683	0.560338	0.0751055	0.259072	0.0649789	0	0.0405063	2370	313	0	313	0.11666	630.615	14.6958	2805.8	93.5	0.0325273	0.0841331	2	0.849226
182	L11	K05908	1	treatment	DU145	190219_IDG_29	72	2959	0.491186	0.275838	0.160387	0.0193571	0.00207397	0.051158	2893	66	0	66	0.0223048	630.615	14.6958	2805.8	93.5	0.0325273	-0.0102225	1	1.02863
182	L11	K05908	1	treatment	DU145	190219_IDG_30	72	3184	0.445972	0.286182	0.192862	0.0206287	0	0.0543549	3054	130	0	130	0.0408291	630.615	14.6958	2805.8	93.5	0.0325273	0.00830183	2	1.08029
183	D19	NVP-2	1	treatment	DU145	190219_IDG_29	72	2750	0.469861	0.300636	0.173718	0.0168476	0	0.0389367	2671	79	0	79	0.0287273	630.615	14.6958	2805.8	93.5	0.0325273	-0.00380004	1	0.954795
183	D19	NVP-2	1	treatment	DU145	190219_IDG_30	72	2969	0.473556	0.275574	0.186848	0.0219207	0	0.0421016	2874	95	0	95	0.0319973	630.615	14.6958	2805.8	93.5	0.0325273	-0.000530008	2	1.02243
184	G10	NVS-PAK1-1	1	treatment	DU145	190219_IDG_29	72	2756	0.470238	0.311012	0.156622	0.0204613	0.000744048	0.0409226	2688	68	0	68	0.0246734	630.615	14.6958	2805.8	93.5	0.0325273	-0.00785387	1	0.960562
184	G10	NVS-PAK1-1	1	treatment	DU145	190219_IDG_30	72	2996	0.458319	0.306122	0.169837	0.0200623	0.00933933	0.0363196	2891	105	0	105	0.0350467	630.615	14.6958	2805.8	93.5	0.0325273	0.00251942	2	1.02797
185	C06	PFE-PKIS 1	1	treatment	DU145	190219_IDG_29	72	2585	0.454397	0.303067	0.177096	0.0241309	0	0.0413088	2445	140	0	140	0.0541586	630.615	14.6958	2805.8	93.5	0.0325273	0.0216313	1	0.876172
185	C06	PFE-PKIS 1	1	treatment	DU145	190219_IDG_30	72	2669	0.477282	0.309903	0.148738	0.0221359	0.00893204	0.0330097	2575	94	0	94	0.0352192	630.615	14.6958	2805.8	93.5	0.0325273	0.00269187	2	0.921851
186	E06	PFE-PKIS 12	1	treatment	DU145	190219_IDG_29	72	2689	0.499809	0.296594	0.150402	0.021814	0	0.0313816	2613	76	0	76	0.0282633	630.615	14.6958	2805.8	93.5	0.0325273	-0.00426402	1	0.934968
186	E06	PFE-PKIS 12	1	treatment	DU145	190219_IDG_30	72	2860	0.446358	0.29207	0.193398	0.0229638	0.00107643	0.0441335	2787	73	0	73	0.0255245	630.615	14.6958	2805.8	93.5	0.0325273	-0.00700284	2	0.993767
187	E07	PFE-PKIS 21 (PD 0325901)	1	treatment	DU145	190219_IDG_29	72	1765	0.680495	0.141176	0.1387	0.0210526	0.00371517	0.0148607	1615	150	0	150	0.0849858	630.615	14.6958	2805.8	93.5	0.0325273	0.0524585	1	0.547539
187	E07	PFE-PKIS 21 (PD 0325901)	1	treatment	DU145	190219_IDG_30	72	1771	0.636538	0.144872	0.169872	0.024359	0	0.024359	1560	211	0	211	0.119142	630.615	14.6958	2805.8	93.5	0.0325273	0.0866144	2	0.52284
188	I11	PFE-PKIS 25	1	treatment	DU145	190219_IDG_29	72	3095	0.456201	0.298179	0.184129	0.0151151	0	0.0463758	2911	184	0	184	0.0594507	630.615	14.6958	2805.8	93.5	0.0325273	0.0269234	1	1.03448
188	I11	PFE-PKIS 25	1	treatment	DU145	190219_IDG_30	72	3138	0.425889	0.3083	0.193347	0.0247036	0.00922266	0.0385375	3036	102	0	102	0.0325048	630.615	14.6958	2805.8	93.5	0.0325273	-2.25333e-05	2	1.07459
189	N20	PFE-PKIS 29	1	treatment	DU145	190219_IDG_29	72	1098	0.786603	0.0344498	0.149282	0.0200957	0	0.00956938	1045	53	0	53	0.0482696	630.615	14.6958	2805.8	93.5	0.0325273	0.0157423	1	0.264313
189	N20	PFE-PKIS 29	1	treatment	DU145	190219_IDG_30	72	1222	0.786225	0.0339893	0.13864	0.0241503	0	0.0169946	1118	104	0	104	0.0851064	630.615	14.6958	2805.8	93.5	0.0325273	0.0525791	2	0.304583
190	M17	PFE-PKIS 3	1	treatment	DU145	190219_IDG_29	72	3057	0.470212	0.290811	0.166611	0.0235611	0.0117805	0.0370246	2971	86	0	86	0.0281322	630.615	14.6958	2805.8	93.5	0.0325273	-0.00439516	1	1.05384
190	M17	PFE-PKIS 3	1	treatment	DU145	190219_IDG_30	72	2888	0.465861	0.282717	0.170341	0.0227596	0.00817923	0.0501422	2812	76	0	76	0.0263158	630.615	14.6958	2805.8	93.5	0.0325273	-0.00621152	2	1.00205
191	L12	PFE-PKIS 32	1	treatment	DU145	190219_IDG_29	72	2962	0.487279	0.273498	0.168905	0.0233216	0	0.0469965	2830	132	0	132	0.0445645	630.615	14.6958	2805.8	93.5	0.0325273	0.0120372	1	1.00799
191	L12	PFE-PKIS 32	1	treatment	DU145	190219_IDG_30	72	3113	0.495017	0.272425	0.171761	0.0172757	0.000332226	0.0431894	3010	103	0	103	0.0330871	630.615	14.6958	2805.8	93.5	0.0325273	0.000559741	2	1.06632
192	I14	PFE-PKIS 34	1	treatment	DU145	190219_IDG_29	72	2960	0.482628	0.28655	0.168903	0.0175439	0.00171999	0.0426557	2907	53	0	53	0.0179054	630.615	14.6958	2805.8	93.5	0.0325273	-0.0146219	1	1.03318
192	I14	PFE-PKIS 34	1	treatment	DU145	190219_IDG_30	72	2827	0.472662	0.292446	0.175899	0.0208633	0.0118705	0.026259	2780	47	0	47	0.0166254	630.615	14.6958	2805.8	93.5	0.0325273	-0.0159019	2	0.99144
193	C13	PFE-PKIS 39	1	treatment	DU145	190219_IDG_29	72	2942	0.459332	0.323529	0.149601	0.0196078	0	0.0479303	2754	188	0	188	0.0639021	630.615	14.6958	2805.8	93.5	0.0325273	0.0313748	1	0.98277
193	C13	PFE-PKIS 39	1	treatment	DU145	190219_IDG_30	72	2886	0.40123	0.322359	0.199711	0.0249638	0.00940666	0.04233	2764	122	0	122	0.042273	630.615	14.6958	2805.8	93.5	0.0325273	0.00974573	2	0.98611
194	E04	PFE-PKIS 40	1	treatment	DU145	190219_IDG_29	72	1282	0.801501	0.0375313	0.132611	0.0183486	0	0.0100083	1199	83	0	83	0.0647426	630.615	14.6958	2805.8	93.5	0.0325273	0.0322153	1	0.34765
194	E04	PFE-PKIS 40	1	treatment	DU145	190219_IDG_30	72	1030	0.757009	0.0456906	0.15161	0.0259605	0.00726895	0.0124611	963	67	0	67	0.0650485	630.615	14.6958	2805.8	93.5	0.0325273	0.0325212	2	0.217237
195	H12	PFE-PKIS 41	1	treatment	DU145	190219_IDG_29	72	2916	0.471958	0.294885	0.164021	0.0243386	0.0010582	0.043739	2835	81	0	81	0.0277778	630.615	14.6958	2805.8	93.5	0.0325273	-0.00474954	1	1.00964
195	H12	PFE-PKIS 41	1	treatment	DU145	190219_IDG_30	72	2814	0.45675	0.311256	0.176982	0.0177343	0	0.0372783	2763	51	0	51	0.0181237	630.615	14.6958	2805.8	93.5	0.0325273	-0.0144036	2	0.985776
196	F13	PFE-PKIS 44	1	treatment	DU145	190219_IDG_29	72	2757	0.482357	0.281156	0.168919	0.0243994	0	0.0431682	2664	93	0	93	0.0337323	630.615	14.6958	2805.8	93.5	0.0325273	0.001205	1	0.952414
196	F13	PFE-PKIS 44	1	treatment	DU145	190219_IDG_30	72	2701	0.464027	0.261134	0.202512	0.0228397	0.000761325	0.0487248	2627	74	0	74	0.0273973	630.615	14.6958	2805.8	93.5	0.0325273	-0.00513005	2	0.939776
197	F19	SB-216385	1	treatment	DU145	190219_IDG_29	72	2875	0.45233	0.311111	0.164875	0.0261649	0	0.0455197	2790	85	0	85	0.0295652	630.615	14.6958	2805.8	93.5	0.0325273	-0.0029621	1	0.994763
197	F19	SB-216385	1	treatment	DU145	190219_IDG_30	72	2857	0.437477	0.303371	0.18485	0.018485	0.0007249	0.0550924	2759	98	0	98	0.0343017	630.615	14.6958	2805.8	93.5	0.0325273	0.0017744	2	0.984441
198	G15	SB-219980	1	treatment	DU145	190219_IDG_29	72	2563	0.451152	0.310564	0.170373	0.0234313	0.000397141	0.0440826	2518	45	0	45	0.0175575	630.615	14.6958	2805.8	93.5	0.0325273	-0.0149698	1	0.901978
198	G15	SB-219980	1	treatment	DU145	190219_IDG_30	72	2820	0.446886	0.30696	0.174359	0.018315	0	0.0534799	2730	90	0	90	0.0319149	630.615	14.6958	2805.8	93.5	0.0325273	-0.00061242	2	0.974728
199	N06	SB-242719	1	treatment	DU145	190219_IDG_29	72	2879	0.481441	0.280721	0.168288	0.0162162	0.0036036	0.0497297	2775	104	0	104	0.0361237	630.615	14.6958	2805.8	93.5	0.0325273	0.00359634	1	0.989776
199	N06	SB-242719	1	treatment	DU145	190219_IDG_30	72	2819	0.476032	0.274336	0.170723	0.020649	0	0.0582596	2712	107	0	107	0.0379567	630.615	14.6958	2805.8	93.5	0.0325273	0.00542941	2	0.968671
200	J10	SB-282975	1	treatment	DU145	190219_IDG_29	72	3137	0.46771	0.30561	0.15786	0.0198956	0.00130463	0.047619	3066	71	0	71	0.0226331	630.615	14.6958	2805.8	93.5	0.0325273	-0.00989422	1	1.08408
200	J10	SB-282975	1	treatment	DU145	190219_IDG_30	72	2989	0.455862	0.3	0.184483	0.0203448	0.00103448	0.0382759	2900	89	0	89	0.0297758	630.615	14.6958	2805.8	93.5	0.0325273	-0.00275147	2	1.0309
201	L17	SB-517081	1	treatment	DU145	190219_IDG_29	72	3254	0.433807	0.31248	0.181991	0.0195893	0.000631912	0.0515008	3165	89	0	89	0.027351	630.615	14.6958	2805.8	93.5	0.0325273	-0.00517636	1	1.11506
201	L17	SB-517081	1	treatment	DU145	190219_IDG_30	72	3150	0.473223	0.259981	0.194417	0.0159039	0.00714054	0.0493346	3081	69	0	69	0.0219048	630.615	14.6958	2805.8	93.5	0.0325273	-0.0106226	2	1.08881
202	E20	SB-590885	1	treatment	DU145	190219_IDG_29	72	2698	0.435868	0.311389	0.178963	0.0215664	0	0.0522134	2643	55	0	55	0.0203855	630.615	14.6958	2805.8	93.5	0.0325273	-0.0121418	1	0.945253
202	E20	SB-590885	1	treatment	DU145	190219_IDG_30	72	2521	0.45547	0.295649	0.181375	0.0227735	0	0.0447336	2459	62	0	62	0.0245934	630.615	14.6958	2805.8	93.5	0.0325273	-0.0079339	2	0.881153
203	J03	SB-633825	1	treatment	DU145	190219_IDG_29	72	2798	0.480163	0.309974	0.152392	0.0177976	0.00111235	0.0385614	2697	101	0	101	0.0360972	630.615	14.6958	2805.8	93.5	0.0325273	0.0035699	1	0.963608
203	J03	SB-633825	1	treatment	DU145	190219_IDG_30	72	3272	0.467553	0.301994	0.171257	0.0193099	0.00664767	0.0332384	3159	113	0	113	0.0345355	630.615	14.6958	2805.8	93.5	0.0325273	0.00200814	2	1.1132
204	I21	SB-693162/GW549034	1	treatment	DU145	190219_IDG_29	72	2721	0.477539	0.272178	0.184975	0.018875	0	0.0464326	2649	72	0	72	0.0264609	630.615	14.6958	2805.8	93.5	0.0325273	-0.00606645	1	0.947302
204	I21	SB-693162/GW549034	1	treatment	DU145	190219_IDG_30	72	2759	0.500373	0.267364	0.165795	0.0182972	0.00186706	0.0463032	2678	81	0	81	0.0293585	630.615	14.6958	2805.8	93.5	0.0325273	-0.00316885	2	0.957172
205	I20	SB-708998	1	treatment	DU145	190219_IDG_29	72	2791	0.469186	0.289802	0.181585	0.0172414	0	0.0421864	2726	65	0	65	0.0232891	630.615	14.6958	2805.8	93.5	0.0325273	-0.00923817	1	0.973384
[truncated: 4,581 more rows]

## Sheet: grvalues_mean_post_gating_corr
cell_line	agent	concentration	cell_count__total	G1	S	G2	S_dropout	subG1	beyondG2	cell_count	cell_count__dead	corpse_count	dead_count	fraction_dead	cell_count__time0	dead_count__time0	cell_count__ctrl	dead_count__ctrl	fraction_dead__ctrl	increase_fraction_dead	replicate	GRvalue
A375	AH5015	1	11961.5	0.523489	0.286335	0.140968	0.019922	0	0.0292863	10061.5	1900	0	1900	0.158799	973.792	27.5583	11033.4	1064.1	0.0878714	0.070928	1.5	0.948008
A375	BI00007366	1	12454.5	0.562161	0.276329	0.115438	0.0143268	0.0159876	0.0157577	11697	757.5	0	757.5	0.0610646	973.792	27.5583	11033.4	1064.1	0.0878714	-0.0268068	1.5	1.03328
A375	BI00009348	1	12489.5	0.543485	0.281567	0.134506	0.0153455	0	0.0250955	10989.5	1500	0	1500	0.120184	973.792	27.5583	11033.4	1064.1	0.0878714	0.0323126	1.5	0.997641
A375	BI00036838	1	2724	0.512225	0.138121	0.199359	0.0467154	0.0610878	0.042492	2328	396	0	396	0.145781	973.792	27.5583	11033.4	1064.1	0.0878714	0.0579096	1.5	0.281166
A375	BI00047804	1	12378.5	0.544816	0.2862	0.128344	0.0182768	0	0.0223624	11197.5	1181	0	1181	0.0954008	973.792	27.5583	11033.4	1064.1	0.0878714	0.00752942	1.5	1.00828
A375	BI00113608	1	12316	0.570099	0.259342	0.116756	0.0191439	0.00122175	0.0334383	11223	1093	0	1093	0.0886704	973.792	27.5583	11033.4	1064.1	0.0878714	0.000799007	1.5	1.00966
A375	BI00133844	1	11553	0.558366	0.262633	0.131219	0.0180695	0.00672596	0.0229859	10518	1035	0	1035	0.0893462	973.792	27.5583	11033.4	1064.1	0.0878714	0.00147485	1.5	0.97276
A375	BI00601000	1	12288.5	0.547695	0.272186	0.132418	0.0170168	0.00584113	0.0248432	11288	1000.5	0	1000.5	0.0815284	973.792	27.5583	11033.4	1064.1	0.0878714	-0.00634298	1.5	1.01295
A375	BI00604564	1	11786.5	0.549844	0.271162	0.124079	0.0179876	0.0141151	0.0228121	10686.5	1100	0	1100	0.0933739	973.792	27.5583	11033.4	1064.1	0.0878714	0.0055025	1.5	0.981603
A375	BI00614644	1	13065.5	0.519448	0.268715	0.141754	0.0188049	0.00573833	0.0455394	11640.5	1425	0	1425	0.109083	973.792	27.5583	11033.4	1064.1	0.0878714	0.0212121	1.5	1.0308
A375	BI00645435	1	11228	0.632395	0.218285	0.0917793	0.0129034	0.0389238	0.00571379	10544.5	683.5	0	683.5	0.0608071	973.792	27.5583	11033.4	1064.1	0.0878714	-0.0270643	1.5	0.973852
A375	BI00801818	1	11597	0.512871	0.305777	0.13199	0.0170786	0.00469079	0.0275924	10509	1088	0	1088	0.0934588	973.792	27.5583	11033.4	1064.1	0.0878714	0.00558738	1.5	0.972377
[truncated: 3,372 more rows]

## Sheet: dmso_control_data
cell_line	concentration	cell_count__total	G1	S	G2	S_dropout	subG1	beyondG2	cell_count	cell_count__dead	corpse_count	dead_count
[truncated: 18 more rows]
