# Supplementary material for: The Kinase Chemogenomic Set (KCGS): An Open Science Resource for Kinase Vulnerability Identification
Source: Int J Mol Sci. 2021 Jan 8;22(2):566. doi: 10.3390/ijms22020566 (PMC7826789; doi:10.3390/ijms22020566)
Supplement: Supplementary file 1 [file ijms-22-00566-s001.zip › SI Table 7 Autophagy raw data.xlsx]

## Sheet: Platemap_1
		1	2	3	4	5	6	7	8	9	10	11	12	13	14	15	16	17	18	19	20	21	22	23	24
	A																									A
	B																									B
	C			GSK2336394	GSK2336394	GSK2373690	GSK2373690	PFE-PKIS 1	PFE-PKIS 1	GSK270822A	GSK270822A	GSK2297428	GSK2297428	JNK-IN-7	JNK-IN-7	GW406108X	GW406108X	PFE-PKIS 39	PFE-PKIS 39	GW300660X	GW300660X	GSK1122999	GSK1122999			C
	D			GSK2336394	DMSO	GSK2373690	Torin	PFE-PKIS 1	Tor+Baf	GSK270822A	DMSO	GSK2297428	Torin	JNK-IN-7	Tor+Baf	GW406108X	DMSO	PFE-PKIS 39	Torin	GW300660X	Tor+Baf	GSK1122999	DMSO			D
	E			ERK5-IN-1	ERK5-IN-1	DDR1-IN-1	DDR1-IN-1	XMD8-92	XMD8-92	BI00604564	BI00604564	GW867253	GW867253	CCT244747	CCT244747	GW416981X	GW416981X	GW868318	GW868318	GW810372X	GW810372X	GW572399X	GW572399X			E
	F			ERK5-IN-1	DMSO	DDR1-IN-1	Torin	XMD8-92	Tor+Baf	BI00604564	DMSO	GW867253	Torin	CCT244747	Tor+Baf	GW416981X	DMSO	GW868318	Torin	GW810372X	Tor+Baf	GW572399X	DMSO			F
	G			GSK312879	GSK312879	GSK336313	GSK336313	TPKI-72	TPKI-72	GSK2283293	GSK2283293	SB-725317	SB-725317	GSK461364	GSK461364	GSK200398A	GSK200398A	NVP-2	NVP-2	TPKI-85	TPKI-85	GSK583	GSK583			G
	H			GSK312879	DMSO	GSK336313	Torin	TPKI-72	Tor+Baf	GSK2283293	DMSO	SB-725317	Torin	GSK461364	Tor+Baf	GSK200398A	DMSO	NVP-2	Torin	TPKI-85	Tor+Baf	GSK583	DMSO			H
	I			PFE-PKIS 40	PFE-PKIS 40	GW335962X	GW335962X	PFE-PKIS 12	PFE-PKIS 12	PFE-PKIS 21	PFE-PKIS 21	GNF-5	GNF-5	BIBW3133BS	BIBW3133BS	BI00133844	BI00133844	HG-10-102-01	HG-10-102-01	GW855857	GW855857	GW569293E	GW569293E			I
	J			PFE-PKIS 40	DMSO	GW335962X	Torin	PFE-PKIS 12	Tor+Baf	PFE-PKIS 21	DMSO	GNF-5	Torin	BIBW3133BS	Tor+Baf	BI00133844	DMSO	HG-10-102-01	Torin	GW855857	Tor+Baf	GW569293E	DMSO			J
	K			GW513184X	GW513184X	GW412617	GW412617	VE-822	VE-822	TPKI-97	TPKI-97	SB-590885	SB-590885	TX-85-1	TX-85-1	CCT251921	CCT251921	CA93.0	CA93.0	GW276655	GW276655	GSK2656157	GSK2656157			K
	L			GW513184X	DMSO	GW412617	Torin	VE-822	Tor+Baf	TPKI-97	DMSO	SB-590885	Torin	TX-85-1	Tor+Baf	CCT251921	DMSO	CA93.0	Torin	GW276655	Tor+Baf	GSK2656157	DMSO			L
	M			GSK237701A	GSK237701A	SB-747651A	SB-747651A	BIRZ0518XX	BIRZ0518XX	GSK204607	GSK204607	PFE-PKIS 44	PFE-PKIS 44	XMD8-87	XMD8-87	GW300657X	GW300657X	GR269666A	GR269666A	BMX-IN-1	BMX-IN-1	SB-216385	SB-216385			M
	N			GSK237701A	DMSO	SB-747651A	Torin	BIRZ0518XX	Tor+Baf	GSK204607	DMSO	PFE-PKIS 44	Torin	XMD8-87	Tor+Baf	GW300657X	DMSO	GR269666A	Torin	BMX-IN-1	Tor+Baf	SB-216385	DMSO			N
	O																									O
	P																									P
		1	2	3	4	5	6	7	8	9	10	11	12	13	14	15	16	17	18	19	20	21	22	23	24

## Sheet: Plate 1 Ratio Green_Red 1
In red excluded wells from the analysis
	Vessel Name: 190730_RPE1_KCGS_Plate_1		C3	D3	E3	F3	G3	H3	I3	J3	K3	L3	M3	N3	C4	D4	E4	F4	G4	H4	I4	J4	K4	L4	M4	N4	C5	D5	E5	F5	G5	H5	I5	J5	K5	L5	M5	N5	C6	D6	E6	F6	G6	H6	I6	J6	K6	L6	M6
	Date Time	Elapsed	GSK2336394	GSK2336394	ERK5-IN-1	ERK5-IN-1	GSK312879	GSK312879	PFE-PKIS 40	PFE-PKIS 40	GW513184X	GW513184X	GSK237701A	GSK237701A	GSK2336394	DMSO	ERK5-IN-1	DMSO	GSK312879	DMSO	PFE-PKIS 40	DMSO	GW513184X	DMSO	GSK237701A	DMSO	GSK2373690	GSK2373690	DDR1-IN-1	DDR1-IN-1	GSK336313	GSK336313	GW335962X	GW335962X	GW412617	GW412617	SB-747651A	SB-747651A	GSK2373690	Torin	DDR1-IN-1	Torin	GSK336313	Torin	GW335962X	Torin	GW412617	Torin	SB-747651A
	43676.9	0	18.0868	17.9934	18.1318	18.2787	17.966	17.0517	17.1231	17.0393	1.23287	18.7959	18.4616	18.8006	16.7839	18.1934	18.0981	17.6561	17.5493	17.8028	16.7495	18.1111	18.0472	17.8457	18.1317	17.9572	17.8952	17.939	18.2622	17.9072	17.1579	18.3301	18.6655	18.781	18.4947	17.8032	18.6247	18.1726	17.5857	17.7106	17.5367	17.066	18.4195	17.2348	17.6218	17.9688	18.1435	18.0993	17.9239
	43676.9	2	17.9758	18.0104	18.2543	18.7359	17.955	17.0306	15.4792	15.4243	1.28366	18.808	18.805	19.0259	16.9785	18.2821	18.3803	17.7253	17.7499	17.9136	15.125	18.2199	18.0439	17.978	18.4893	17.8605	17.486	17.6272	18.3962	17.9841	17.1827	18.2801	18.9755	18.9649	18.3057	17.9721	18.7356	18.3737	17.2145	15.6288	17.4428	15.0561	18.6064	15.4209	17.6968	16.0979	18.2202	16.1422	18.0948
	43677	4	18.0562	18.0401	18.6626	19.1239	17.866	17.2194	13.8591	13.9112	1.36003	18.9243	18.9032	19.1399	16.8775	18.2823	18.7736	17.7447	17.9267	18.1376	13.613	18.4653	17.9524	18.3823	18.7096	18.2114	17.3066	17.4368	18.5913	18.0859	17.6902	18.0652	18.7867	19.2849	18.3399	17.9524	18.9813	18.5909	16.9383	13.7731	17.8366	13.2655	18.5125	13.552	17.8265	14.1572	18.0221	14.5443	18.0783
	43677.1	6	17.8453	18.2355	19.3085	19.7753	18.091	17.2913	12.3895	12.4183	1.43709	18.8452	19.2108	19.1927	16.852	18.4473	19.6691	17.8507	17.9558	18.2263	12.1018	18.5575	18.2682	18.275	19.4555	18.2321	16.8771	17.3249	18.411	18.0548	17.8083	18.1728	19.0576	19.1268	18.5631	17.9231	19.0235	18.7378	16.7117	11.8598	17.9333	11.4668	18.4413	11.7274	18.1051	12.1176	18.2046	12.5259	17.9768
	43677.2	8	17.7782	18.1895	19.8438	20.1455	18.3672	17.2791	11.2086	11.481	1.4636	18.6393	19.4458	19.5183	16.6219	18.169	20.5788	17.9526	18.2726	18.1257	11.2186	18.7315	18.4468	18.3096	19.3556	18.4736	16.694	17.2438	18.6269	18.3959	17.7531	18.2745	19.2611	19.5527	18.4599	18.0167	19.3101	18.9399	16.3923	10.6118	17.9695	9.91051	18.4407	10.3521	18.1669	10.441	18.0848	11.1586	18.6373
	43677.3	10	17.3529	18.1608	20.4203	20.6336	18.3763	17.4802	10.5839	10.846	1.55692	18.8112	19.6097	19.4523	16.3478	18.0588	21.0284	17.8244	18.4136	18.0437	10.5541	18.6356	18.4519	18.2987	19.9442	18.2987	16.17	17.1195	18.5159	18.5847	17.8683	18.3651	19.3245	19.6284	18.5913	18.2411	19.4605	19.126	16.0143	9.22815	18.2181	9.04948	18.5789	9.16967	18.138	9.28761	18.0766	9.94027	18.7305
	43677.4	12	17.0074	18.0777	20.9178	21.1739	18.4828	17.5114	10.2144	10.2366	1.57866	19.0735	19.2799	19.4465	16.2564	17.9208	21.4484	18.0607	18.3618	18.3554	9.89141	18.6398	18.538	18.4581	19.9538	18.4918	15.7998	16.9992	18.6305	18.5389	17.9709	18.2789	19.7067	19.7431	18.5173	18.5626	19.538	19.0385	15.6415	8.43175	18.0405	8.13663	18.6047	8.34772	18.4585	8.42843	18.2222	8.91999	18.8951
	43677.4	14	16.6842	18.2032	21.3117	21.7093	18.6136	17.8114	9.80531	9.92515	1.69633	19.0112	19.4976	19.45	15.7592	17.9549	21.9505	18.1479	18.3592	18.1942	9.78653	18.7498	18.5836	18.6732	19.9039	18.5607	15.4154	16.8072	18.8755	18.7073	18.4075	18.3899	20.0523	19.9832	18.6278	18.7003	19.5055	18.9948	15.189	7.58953	18.2804	7.5372	18.7585	7.67232	18.5328	7.72019	18.4328	8.10106	19.0526
	43677.5	16	16.2375	18.2702	21.8583	22.6885	18.9627	17.7881	9.64668	9.78675	1.7933	19.2516	19.3178	19.4679	15.496	17.7809	22.5559	18.3179	18.5215	18.2026	9.57555	18.6442	18.9162	18.9109	19.8521	18.3742	14.8959	16.7044	18.9161	18.8028	18.4249	18.2849	20.2952	20.3433	18.6908	18.5775	19.7	19.4185	14.5952	7.10724	18.2334	7.05449	18.8718	7.09228	18.5509	7.18925	18.4169	7.62888	19.4444
	43677.6	18	16.1764	18.3664	22.4853	23.2131	19.1096	18.1561	9.61609	9.8201	1.72642	19.2099	19.4139	19.7492	15.2267	17.8741	23.2794	18.476	18.9563	18.3807	9.53359	19.1061	19.2814	18.9091	20.0585	18.5245	14.6469	16.968	19.4657	19.3109	18.9488	18.8412	20.593	20.6499	19.0987	19.1314	19.9036	19.5437	14.508	6.84392	18.681	6.80794	19.3194	6.87766	19.0548	6.88928	18.8933	7.32554	19.8314
	43677.7	20	15.6341	18.5478	22.8174	23.3283	19.092	18.0738	9.44138	9.80473	1.97516	19.3357	19.0134	19.2788	14.6971	17.786	23.6953	18.3761	18.8629	18.552	9.38838	19.301	19.2593	19.31	19.7459	18.5039	13.909	16.5907	19.2017	19.646	19.0253	18.6916	20.7593	20.9747	19.2119	19.3722	20.0635	19.4033	13.7467	6.41554	18.7386	6.37703	19.2871	6.49129	19.6178	6.45593	19.0394	6.80637	19.8749
	43677.8	22	15.2555	18.4459	22.9662	23.9471	19.2646	18.2044	9.48369	9.9427	2.08455	19.7202	18.802	19.0218	14.1956	17.8725	23.6667	18.4873	18.9777	18.5949	9.52695	19.1872	19.1192	18.9044	19.3228	18.434	13.3993	16.353	19.7003	19.5601	19.1571	18.7075	21.097	21.4601	19.1555	19.7586	20.2823	19.7934	13.1374	5.98904	18.9756	6.1624	19.6025	6.09743	19.9054	6.16304	19.0129	6.49749	20.5275
	43677.9	24	14.5667	18.4088	23.8016	24.3198	19.6674	18.4551	9.70547	9.93111	2.14092	19.4972	18.5605	18.7677	13.5933	17.7871	23.7884	18.7983	19.1692	18.6986	9.68775	19.6419	19.7206	19.4576	19.1115	18.5018	12.7936	16.2503	19.9018	20.0028	19.4022	18.944	22.6073	21.9841	19.6015	20.2248	20.8538	19.8552	12.4175	5.75714	19.2762	5.97558	19.5984	5.89531	20.2377	5.97112	19.3714	6.31247	20.6215
	43677.9	26	14.1088	18.4719	24.1112	24.1978	19.7486	18.4372	9.82122	10.0016	2.12284	19.8105	18.1787	18.3438	12.9912	17.6342	24.1869	18.836	19.1791	19.1367	9.7443	19.7737	19.6714	20.0865	18.6318	18.6421	12.1706	16.3221	20.469	20.4931	19.796	19.292	23.3059	22.6004	19.9468	20.7695	21.1855	20.3026	11.7037	5.4701	19.6595	5.81257	19.9778	5.69612	20.5875	5.91828	19.5067	6.07778	21.2049
	43678	28	13.343	18.6769	24.7174	24.7611	19.9397	18.9937	10.0789	10.1094	2.32551	19.9918	17.8217	17.9155	12.2325	17.9163	24.4485	19.1303	19.2432	18.9572	9.93023	20.1145	19.7727	19.7591	18.1589	18.8788	11.5206	16.2276	20.6092	21.0901	19.8773	19.7331	22.9822	23.4987	20.4291	20.4668	20.9918	19.9216	11.0951	5.23193	19.5453	5.71932	20.1475	5.65669	20.6282	5.76926	19.7014	5.91283	21.3834
	43678.1	30	12.7683	18.899	24.0512	24.9909	20.0031	19.0917	10.208	10.4268	2.44721	20.129	17.3229	17.4595	11.6852	17.7597	24.5682	19.407	19.4651	19.3526	10.1553	20.5139	20.3226	20.4193	17.7785	18.8023	10.9125	16.1529	20.9273	21.2498	20.1813	20.125	23.2181	24.3067	20.7088	21.3676	21.8842	20.2761	10.4387	5.06576	19.7457	5.67851	21.2598	5.55866	21.3156	5.71765	20.2223	5.80608	21.9214
	43678.2	32	12.0105	19.1946	24.9058	25.3465	20.2903	19.2583	10.6834	10.6041	2.55047	20.7637	16.9263	17.0933	11.0413	18.0329	24.7909	19.8108	20.0154	20.1758	10.1984	20.5934	20.5941	20.8745	17.3547	19.2915	10.3741	16.1573	21.0317	21.2263	20.2617	20.3204	23.4821	24.5346	20.7551	21.6455	22.1338	20.8574	9.97439	4.92198	19.868	5.72583	21.3404	5.56466	21.6844	5.69202	20.6341	5.813	22.2929
	43678.3	34	11.3776	19.5181	24.6219	25.5303	20.2282	19.4047	10.7934	10.8415	2.635	20.8114	16.5174	16.7311	10.5511	18.2642	24.3579	19.8677	19.8555	19.767	10.6258	20.6368	20.9322	21.4909	17.0241	19.4185	9.82892	16.3077	21.7065	22.2659	20.5895	20.6207	24.6794	24.5204	20.6794	22.4833	22.021	21.599	9.51636	4.76531	20.2202	5.78424	20.7837	5.54318	23.1251	5.69935	20.6334	5.80599	22.0813
	43678.4	36	10.6963	19.8597	24.48	25.8157	20.2258	19.8215	11.2454	11.059	2.58353	21.3586	16.0691	16.2475	10.0495	18.6194	24.3277	20.5794	20.0437	20.0737	10.8587	20.8236	20.7633	21.3025	16.4219	19.9066	9.4131	16.2051	22.2126	22.3148	21.4082	21.2491	24.663	25.4694	21.0498	22.9761	22.3521	21.7091	9.0563	4.64035	20.8071	5.84195	21.6786	5.60157	22.4917	5.73856	21.1727	5.79736	21.9941
	43678.4	38	10.171	20.2111	24.6601	25.4374	20.9341	20.2365	11.3969	11.2137	2.70594	21.4167	15.5061	16.0232	9.55209	19.1367	24.4775	20.856	20.5421	20.6994	11.0537	21.6032	21.1892	21.8914	15.8762	20.1718	9.003	16.0765	21.8662	22.3457	21.8122	21.5915	24.5565	24.9118	21.6321	22.6013	22.5749	21.6986	8.76987	4.49299	21.0699	5.88319	22.4802	5.63342	23.9962	5.80311	20.9361	5.89743	21.8967
	43678.5	40	9.75339	20.8942	24.0978	24.7705	21.0325	20.1752	11.7106	11.491	2.69148	21.8414	15.1051	15.4002	9.30989	19.1562	24.2143	20.7687	20.8746	20.7524	11.401	20.952	21.3353	21.1554	15.533	20.6966	8.7351	16.18	21.7983	22.3151	21.6854	21.0991	24.6258	24.9472	21.5806	22.295	22.133	21.8729	8.46689	4.40727	21.4655	5.97037	21.902	5.6557	24.4416	5.91907	21.4617	5.8852	22.303
	43678.6	42	9.30382	20.4251	24.116	25.1627	20.7849	20.3127	11.9219	11.6991	2.76932	22.1149	14.8782	15.0107	9.04479	19.0723	23.7332	20.7212	20.7782	20.9957	11.6732	21.173	21.3054	22.0831	15.121	20.6638	8.44184	16.7083	22.6726	23.0511	21.6776	22.0825	24.9706	26.334	22.3533	22.389	22.1398	21.6387	8.2119	4.28828	21.6006	5.998	23.1778	5.74624	24.5308	5.9827	22.1054	5.98272	22.415
	43678.7	44	8.89798	21.3472	23.7417	24.2697	21.218	20.568	12.3117	12.0951	3.03696	21.9476	14.6474	14.7083	8.64181	19.3173	23.5466	20.8548	20.9695	20.865	11.9571	21.4231	21.6612	21.677	14.7002	20.9142	8.17619	16.589	22.0125	22.6587	21.7309	21.7118	23.8224	25.1972	22.2319	22.5318	21.7654	21.8151	7.9298	4.1844	20.9816	6.07426	22.7594	5.74834	24.1534	6.00985	21.5445	6.03636	22.0843
	43678.8	46	8.51823	20.9771	23.9798	24.2936	21.2317	21.1419	12.4024	12.3925	3.02367	21.5933	14.5264	14.4195	8.38823	19.5256	22.9989	20.5295	21.3734	20.9045	12.2172	21.0871	21.6714	21.9679	14.6064	21.2791	7.88213	16.6525	22.4375	22.6461	21.9976	21.8436	23.684	24.6111	21.8237	22.5352	21.8948	21.125	7.67701	4.10641	21.4279	6.17086	22.469	5.83906	23.3452	6.12204	21.4363	6.12567	21.3682
	43678.9	48	8.17038	20.7638	23.1421	24.0421	21.3571	21.2432	12.5642	12.5125	3.15142	21.9211	14.2427	14.0923	8.04918	19.3941	23.2947	20.6636	21.2799	21.45	12.3686	21.2445	21.6081	21.5577	14.2494	20.6891	7.64072	16.6152	21.7751	22.195	21.8209	21.7999	23.6674	24.8895	22.2344	21.9682	22.1526	21.4168	7.44274	4.00423	22.399	6.25206	22.766	5.91832	23.9714	6.17399	21.5765	6.1733	21.1258
	43678.9	50	7.85046	21.1747	23.5791	24.0425	21.8047	20.8431	12.7166	12.6754	3.31976	22.1894	14.1203	13.7619	7.86587	19.5187	23.2813	21.093	21.4014	21.138	12.4188	20.3995	21.6387	22.5581	14.0657	21.3394	7.4866	16.3782	21.987	22.558	21.9584	22.0497	24.1009	25.5048	22.3607	22.1265	22.063	21.5688	7.2885	3.9626	21.4478	6.35202	23.222	5.95945	23.0447	6.24873	22.076	6.182	21.7119
	43679	52	7.53336	20.8639	22.9981	23.375	21.0022	20.8305	12.9797	12.7891	3.38159	22.9103	13.8395	13.4127	7.64257	19.0838	22.6864	20.7518	21.1644	20.8455	12.5168	21.2646	22.5117	21.507	13.7822	20.8006	7.28707	16.5877	21.6527	22.8666	22.1894	22.1223	24.3628	25.2942	22.405	21.9795	21.9047	21.4173	7.07029	3.91297	21.6129	6.4043	22.8716	5.993	23.262	6.28477	22.08	6.2689	21.4088
	43679.1	54	7.19358	20.8574	23.449	23.6593	21.2434	21.3216	12.9932	12.9271	3.55375	21.5496	13.8156	13.3068	7.35239	18.7135	22.3848	20.7014	21.6167	21.4252	12.7477	21.4302	22.164	22.4823	13.6845	21.0167	7.08574	16.4878	21.9375	22.5613	22.5591	22.2313	23.9937	25.1373	22.2145	21.9468	22.0888	21.2878	6.83689	3.81088	21.6616	6.46145	23.1827	6.08058	23.3329	6.34339	21.7866	6.33492	20.6299
	43679.2	56	6.93765	21.4538	23.1914	22.8654	21.4149	21.1453	12.9332	13.1715	3.67946	22.1851	13.6756	13.2172	7.18329	19.1987	21.6871	20.725	21.4179	21.1537	12.9091	21.0294	21.0774	21.9223	13.7613	21.4736	6.86644	16.4578	22.0591	22.1324	21.9297	22.6821	23.4363	24.9307	21.8682	21.8321	21.0953	21.0547	6.6779	3.74836	22.0074	6.57268	23.4149	6.1221	23.6115	6.38635	22.1174	6.38485	20.3827
	43679.3	58	6.79907	20.8775	22.4856	22.3517	21.4306	21.2322	13.3941	13.3387	3.70655	21.8169	13.4619	13.0996	7.06264	19.4189	21.9049	19.9968	20.8809	21.7744	13.0732	21.2015	21.8586	22.5752	13.5094	21.8431	6.78041	16.2753	21.8557	22.7058	21.5732	23.1315	23.6326	24.7504	22.3306	22.1539	21.4601	20.7221	6.60223	3.66313	22.0594	6.64736	22.0558	6.13361	23.3523	6.42228	21.585	6.46854	20.7406
	43679.4	60	6.56924	21.1441	22.2327	21.9084	21.1496	21.3287	13.4217	13.1121	3.81814	21.2156	13.3055	12.8214	6.95216	19.2043	21.2614	19.9674	20.8243	21.0464	13.1187	20.4093	21.5449	22.0478	13.5254	21.5084	6.62632	16.6365	22.6669	23.2069	22.1176	22.6648	22.9472	23.7856	22.3105	22.2061	21.526	21.2389	6.46853	3.63037	21.5679	6.70889	22.4767	6.15218	22.4361	6.4539	21.1689	6.48701	20.6561
	43679.4	62	6.40671	20.2428	21.1203	21.5012	21.3824	21.1524	13.4048	13.1877	3.88561	20.9136	13.362	12.7217	6.84019	19.6615	20.6115	20.4539	20.8877	21.5145	13.5288	20.2813	21.493	21.8224	13.2138	21.1191	6.53202	16.2438	21.3324	23.0379	20.9618	22.0829	22.2062	23.9841	22.0199	21.5117	20.2139	20.3144	6.38073	3.53236	21.6377	6.76534	22.5869	6.23482	22.3573	6.49369	21.2373	6.60121	20.4282
	43679.5	64	6.23225	20.3032	21.1063	20.1646	20.6566	21.377	13.623	13.1891	4.08779	20.411	13.4346	12.7164	6.72067	19.3173	19.8258	19.7561	20.6624	20.7312	13.428	19.3993	20.9206	21.15	13.1787	20.9633	6.43353	16.3968	21.4264	22.8238	20.6803	21.8021	21.8659	24.3316	22.2122	21.0253	19.6638	19.2964	6.2413	3.49848	21.1861	6.86984	22.6917	6.33252	22.2635	6.63054	20.9791	6.71288	20.0722
	43679.6	66	6.07221	19.794	20.5049	20.2778	20.6237	21.0923	13.8136	13.517	4.07511	20.1345	13.3311	12.8111	6.60564	19.2754	19.933	20.1394	20.2052	20.788	13.5067	19.5079	20.9062	21.4035	13.1937	20.7129	6.30352	16.1486	21.3591	21.679	20.9911	21.3317	21.0819	23.6171	21.6826	20.8933	19.6233	20.2424	6.15017	3.41017	21.3526	6.86285	21.4628	6.30124	22.4632	6.63655	21.1679	6.75009	19.2572
	43679.7	68	5.97124	19.7022	20.405	19.2801	19.6286	21.3282	13.8218	13.596	4.05102	19.7678	13.496	13.0331	6.56573	19.221	19.1612	19.6445	20.4398	20.5974	13.6582	19.0291	20.7531	20.473	13.196	20.6189	6.26873	16.6978	21.2593	20.8722	20.6256	20.7798	21.312	22.3528	21.1858	20.5873	19.3932	20.0512	6.17373	3.41678	21.5685	7.03533	21.41	6.46093	22.2003	6.82274	20.8401	6.91976	19.2676
	43679.8	70	5.7664	19.7703	19.1013	18.7921	19.5785	20.4703	13.7201	13.7038	4.15939	18.8076	13.4121	12.8773	6.39739	18.8443	18.5095	18.3099	19.3726	20.1137	13.5779	18.9811	19.7686	20.462	12.9453	20.5074	6.09168	16.5065	20.6254	20.9387	20.0076	21.0774	20.1609	22.0434	20.0046	19.2948	18.7641	19.4041	6.00974	3.33702	20.8571	6.94541	20.8071	6.46495	22.0133	6.81658	19.9326	6.9101	18.4492
	43679.9	72	5.69403	19.0879	18.9871	18.4515	18.5608	19.6539	13.8839	13.7862	4.03205	18.5093	13.1955	12.7125	6.25986	18.014	17.9547	18.3316	19.3928	19.5984	13.3596	18.2842	19.8853	19.55	12.9596	19.2642	5.92796	16.4724	20.0039	20.245	19.714	20.3161	19.9394	21.6515	19.5655	19.0526	18.1558	19.1841	5.85352	3.25829	20.0257	7.00233	19.2236	6.40732	21.0911	6.82642	19.3951	6.89026	18.3199
	43679.9	74	5.48799	19.1982	17.654	17.2231	18.4049	19.4818	14.0389	13.776	3.98336	17.4589	13.2613	12.5439	6.09676	18.1633	17.2666	17.6401	19.6104	18.9518	13.3616	17.6954	18.8062	18.601	12.7827	18.5438	5.76774	16.4201	19.2757	19.648	19.4026	19.4513	19.2194	20.8978	18.727	18.4222	18.3167	18.4513	5.75284	3.22069	20.455	7.08639	19.4121	6.43497	21.5237	6.90046	18.3144	6.91685	18.1382
	43680	76	5.4307	18.4755	17.1673	17.0494	17.8919	19.2044	14.0275	13.7503	4.0716	17.5845	12.7517	12.4985	5.98187	17.849	16.5089	16.8755	18.2972	18.5917	13.6456	17.3065	18.5234	17.6766	12.5281	18.2168	5.70687	15.923	19.5438	19.2124	18.3294	19.5489	18.8819	19.7196	17.7306	17.7951	17.3335	18.4764	5.6096	3.18494	19.4603	7.05145	19.1508	6.44241	20.7327	6.93573	18.043	6.96322	17.2558
	43680.1	78	5.27806	17.8266	16.7044	16.4735	17.3953	18.354	13.8749	13.816	3.96658	16.7905	12.7682	12.4541	5.92157	17.1359	16.02	16.5347	17.8548	17.5399	13.5965	15.9959	17.8624	17.1108	12.4951	17.4679	5.51901	15.7851	19.0011	18.4765	17.5795	18.6627	18.3774	19.1561	17.5206	17.4115	16.6152	17.5449	5.57049	3.15155	19.7613	7.10571	18.4178	6.42992	19.8688	6.9094	17.5711	7.05614	16.7761
	43680.2	80	5.21087	17.6373	16.4481	15.7225	16.847	17.9489	13.7697	13.8582	3.95098	16.4674	12.5215	12.3322	5.82669	16.6901	15.702	16.2444	16.7698	17.337	13.6715	15.316	17.4511	16.4217	12.3702	16.5514	5.46537	15.9903	18.1924	18.1872	16.5334	18.3747	17.7657	19.2859	16.5996	16.4102	16.2261	17.0784	5.48467	3.1217	19.2131	7.07809	17.7702	6.44801	19.7751	6.94204	16.5784	7.09549	16.5273
	43680.3	82	5.10158	17.0273	16.0294	14.8172	16.3029	17.2676	13.8364	13.7339	3.94351	15.8388	12.3735	12.3392	5.71686	16.0717	15.0998	15.9146	16.2404	16.7308	13.28	15.1107	16.5563	15.9036	12.3317	16.0418	5.42454	15.6951	17.1725	17.4579	16.3222	17.6829	16.9815	17.8563	15.6869	15.8399	15.7071	16.559	5.35038	3.12715	18.3864	7.11861	16.4955	6.50335	19.4636	7.03398	16.0992	7.12312	15.625
	43680.4	84	4.95791	16.4176	15.402	14.8428	15.3595	16.6447	14.0691	13.7231	3.88442	15.1565	12.308	12.1646	5.55788	15.6177	14.5308	15.1108	15.5877	16.3309	13.4406	14.8117	15.3725	15.4896	12.2804	15.8861	5.32162	15.6766	16.9421	17.3383	15.3431	16.7232	16.7589	17.53	15.5866	15.4236	15.6048	16.0103	5.34647	3.07774	17.3963	7.08283	16.2999	6.50694	18.313	7.08876	15.479	7.17155	15.5976
	43680.4	86	4.8871	16.2055	14.7765	14.4543	14.6189	16.22	13.7563	13.4445	3.87635	14.2395	11.9381	12.0067	5.46551	15.3363	14.342	15.1071	15.1729	15.732	13.6149	14.2244	15.0985	14.614	12.295	15.6104	5.22226	15.8214	16.3413	16.4176	15.1824	15.7807	16.1536	16.6697	15.0117	14.678	14.7934	15.4615	5.26337	3.04667	16.8764	7.1022	16.0961	6.47836	18.1275	7.11533	15.1288	7.18222	15.4375
	43680.5	88	4.79974	15.3779	14.2631	13.5806	14.0734	15.027	13.9467	13.5311	4.02291	14.1613	11.7411	11.7884	5.41442	14.9635	14.0755	14.4974	14.2802	14.8324	13.5407	13.4867	14.7489	14.077	12.1439	14.955	5.16983	15.4523	15.5366	15.342	13.9549	15.3246	15.4351	16.0933	14.0394	13.8889	14.5238	15.1109	5.14473	3.02705	16.2291	7.06393	15.0668	6.51739	16.8044	7.18812	14.0874	7.25897	15.0931
	43680.6	90	4.77861	15.4467	13.7828	13.9848	13.816	14.6398	13.8676	13.3031	3.90824	14.0137	11.5678	11.7878	5.38686	14.6251	14.0946	14.0217	14.0676	14.6721	13.5069	13.5318	14.3505	13.7755	12.3276	14.4792	5.18039	14.9161	15.5989	15.5757	13.5615	14.9778	14.8031	15.6747	13.6597	13.356	14.7145	15.0767	5.18209	3.0613	15.8985	7.21261	14.8413	6.59817	17.0999	7.33186	14.1814	7.40243	14.912
	43680.7	92	4.62757	15.0329	13.6295	13.1758	12.7345	13.9727	13.9665	13.4724	3.76383	13.5636	11.2728	11.8737	5.2632	14.1867	13.7535	13.1876	13.0061	14.1871	13.4409	12.6165	13.9175	13.1849	12.0868	14.2209	5.09584	14.8226	15.1823	14.9317	13.1372	14.3365	14.2466	14.6366	13.4423	12.955	14.0831	14.6633	5.09857	2.99808	15.7743	7.11091	13.9736	6.58912	15.9898	7.28893	13.3425	7.44594	14.4175
	43680.8	94	4.56953	14.4083	13.4091	13.0821	12.2466	13.2207	13.9178	13.3744	3.76765	12.9091	11.1526	11.625	5.18001	13.5266	13.5593	12.6907	12.7544	13.4099	13.2751	12.551	13.1847	13.0483	11.8954	13.4959	5.12626	14.4857	14.3598	14.1631	12.6214	13.8628	14.0275	14.1334	13.2143	12.3577	14.0819	14.1343	5.03782	2.96666	14.8419	7.12758	13.1528	6.62419	15.5742	7.30306	13.1093	7.42571	13.7329
	43680.9	96	4.50556	13.5609	13.1303	12.7508	11.9104	12.6478	13.7472	13.193	3.73932	12.3106	10.8939	11.5541	5.14528	12.9114	13.2904	12.257	11.9951	13.4011	13.4883	12.1298	12.7716	12.5435	11.6713	13.2344	5.08917	13.8642	14.4628	13.6434	12.1064	13.1225	13.3219	14.0206	12.6202	11.8279	14.2966	13.7082	5.01819	2.95011	14.8323	7.11613	13.178	6.56587	15.3992	7.30507	12.8317	7.44757	13.4193
	43680.9	98	4.43329	13.423	12.656	12.4787	11.1821	12.3636	13.7655	13.2303	3.64667	11.719	10.8071	11.2683	5.12771	12.2593	12.6294	12.1916	12.0128	12.9022	13.439	11.5387	12.4685	12.0896	11.6055	12.8435	5.12626	13.6334	14.1695	13.5288	11.6632	12.7904	12.8063	13.5016	12.1347	11.5379	13.3524	13.4313	4.99331	2.91603	14.1509	7.08931	12.4985	6.60491	14.6623	7.34542	12.5584	7.50871	13.0629
	43681	100	4.3891	12.9932	12.5387	12.3101	10.8123	11.9903	13.8283	13.2989	3.47977	11.821	10.5196	11.2099	5.07778	12.3534	12.4748	11.5918	11.739	12.7446	12.8719	11.3775	12.1721	11.6121	11.2446	12.2776	5.05145	13.5241	13.111	13.3073	11.2866	12.47	12.5591	12.9827	11.8145	11.1223	13.5253	13.3375	5.03396	2.92597	14.003	7.10227	12.3366	6.62278	14.4221	7.41127	11.9702	7.56076	13.1145
	43681.1	102	4.36619	12.8182	12.2055	12.1296	10.5976	11.5308	13.4648	13.0796	3.37871	11.3858	10.3422	11.1976	5.08094	11.9906	11.9042	11.6663	11.4644	12.491	13.1731	10.9628	11.7242	11.3366	10.9935	12.1541	5.0906	12.9497	12.5461	12.6726	11.3899	12.359	12.548	12.573	11.3743	11.1388	13.2016	13.0266	4.97231	2.89136	13.37	7.10661	12.0982	6.69207	13.8361	7.39145	12.0441	7.62949	12.8734
	43681.2	104	4.36402	12.2547	12.6221	11.7859	10.6597	11.3904	13.7149	12.9023	3.45845	11.1722	10.2135	10.9467	5.04941	11.3473	12.1758	11.3188	11.2363	11.9228	12.9745	10.9802	11.3656	11.1881	10.9018	11.7379	5.01779	12.4701	12.4838	12.5935	11.205	12.3603	12.4977	12.4884	11.317	10.7618	12.4993	12.6523	5.01104	2.87027	13.0396	7.09677	12	6.63271	13.737	7.4326	11.5151	7.65951	12.7757
	43681.3	106	4.26888	11.7404	11.9885	11.503	10.6386	11.1586	13.5053	12.8544	3.37911	10.8906	10.1516	10.9408	5.08399	11.0588	11.7659	10.9335	11.0219	11.8619	13.1539	10.7037	11.2092	10.694	10.8335	11.6686	4.9452	12.0238	12.1123	12.0228	10.8088	12.1955	12.128	12.0845	10.7531	10.4415	12.6088	12.5171	4.95291	2.83846	12.5222	7.1058	11.461	6.6894	13.4893	7.507	11.4219	7.66028	12.5714
	43681.4	108	4.28958	11.5442	12.0824	11.3128	10.0287	10.8996	13.5735	12.8392	3.37956	10.583	9.83629	10.9281	5.06522	11.0017	11.9776	10.5663	10.5216	11.3863	12.8901	10.7905	10.723	10.7508	10.6317	11.2629	4.86901	12.0758	11.8165	11.6724	10.3434	11.5487	11.6246	11.9578	10.5686	10.021	12.3624	12.2372	4.92591	2.82334	12.1092	7.0986	10.9515	6.69793	13.0673	7.51591	10.9196	7.67655	12.3129
	43681.4	110	4.24911	11.4461	12.1191	11.4668	10.0002	10.6898	13.5102	12.7081	3.35335	10.2367	9.84136	10.9397	5.03487	10.6064	11.672	10.2147	10.1413	10.9766	13.0745	10.3879	10.547	10.2786	10.6118	11.1863	4.87577	11.7141	11.5467	11.3922	9.98719	11.3692	11.8025	11.6643	10.3097	9.52816	12.2916	11.7364	4.91006	2.82413	12.2524	7.0718	10.9199	6.68973	12.8442	7.52802	10.5137	7.73463	12.2923
	43681.5	112	4.18552	11.2948	11.784	11.3328	9.63185	10.4357	13.4805	12.727	3.30233	9.6633	9.76467	10.7228	4.93632	10.348	11.7622	10.1423	10.1539	11.0846	12.7506	10.344	10.2162	10.003	10.3722	10.9304	4.71894	11.4769	11.3097	11.3763	9.79049	10.9454	11.219	11.4359	9.97563	9.51617	11.6849	11.7223	4.82506	2.80519	11.9027	7.03389	10.5889	6.66322	12.3904	7.57784	10.1376	7.8735	12
	43681.6	114	4.15665	10.7623	11.7672	11.0973	9.33321	10.6358	13.4132	12.9046	3.37043	9.52715	9.50595	10.5796	4.88755	10.3189	11.4804	10.1751	10.0497	10.9309	12.7482	10.2362	10.0642	9.69704	10.2077	10.2804	4.65782	11.1644	11.1633	11.3968	9.64646	10.7631	11.2351	11.1335	9.74407	9.52404	11.5421	11.489	4.79115	2.78688	11.5779	7.0232	10.5214	6.70427	12.4807	7.63614	10.0132	7.80957	11.7159
	43681.7	116	4.04848	10.5221	11.3641	10.8397	9.16515	10.1789	13.1003	12.837	3.23689	9.57798	9.2761	10.4954	4.78495	10.0684	11.2515	9.78695	9.99576	10.8384	12.7269	9.72834	9.93966	9.81014	10.0559	10.0366	4.59437	10.6908	10.9004	10.7606	9.64001	10.6095	10.9313	11.0657	9.63537	9.13326	11.4541	11.4829	4.61406	2.76641	11.5372	7.01495	10.4373	6.72706	12.082	7.65628	9.71841	7.94796	11.5403
	43681.8	118	3.94236	10.3908	10.997	10.9094	9.00045	10.2512	12.8248	12.4814	3.19541	9.20709	8.94883	10.4344	4.77255	9.62222	11.3378	9.78486	9.8155	10.6766	12.3972	9.52944	9.73025	9.66314	10.0765	9.97803	4.58954	10.3072	10.8602	10.6534	9.39913	10.4635	10.622	10.8078	9.48943	9.09108	11.2256	11.1153	4.63928	2.74916	11.3028	7.0536	9.9656	6.78014	11.9352	7.74292	9.63357	7.9024	11.3682
	43681.9	120	3.91944	10.0916	11.1997	10.9573	8.68419	10.2175	12.9278	12.52	3.24517	8.8726	8.93634	10.3139	4.69786	9.55589	10.8966	9.58152	9.80889	10.3788	12.5565	9.26693	9.45604	9.18791	9.87235	9.62229	4.39824	9.9056	10.2967	10.4319	9.06492	10.2314	10.297	10.4233	9.21463	8.70063	11.1326	10.9321	4.51647	2.77507	10.9012	6.97777	10.0037	6.78398	11.4802	7.70394	9.49934	7.96175	11.112
	43681.9	122	3.88659	10.0053	11.0643	10.8474	8.89827	10.0669	12.8965	12.5209	3.21489	8.62529	8.82838	9.99672	4.67269	9.28013	10.9967	9.10289	9.67933	9.90652	12.2756	8.9119	9.09568	9.27792	9.98372	9.35043	4.39553	9.70268	10.136	10.0285	8.92896	9.92905	10.1955	10.3166	9.22556	8.70962	10.7767	10.9066	4.47212	2.78699	10.9163	6.95344	9.66871	6.73248	11.3307	7.84497	9.25023	7.94348	10.8955
	43682	124	3.81947	9.6778	10.8872	10.7059	8.74031	9.78963	12.7917	12.4487	3.15337	8.47766	8.81006	9.81852	4.60339	9.14171	10.7392	9.15006	9.25626	9.88852	12.1914	9.01519	9.06214	8.93152	9.8865	9.30549	4.32751	9.15907	10.1499	10.1698	8.81514	9.89853	10.154	10.2744	9.17841	8.55577	10.6473	10.7175	4.46505	2.75075	10.4885	6.9214	9.49554	6.7449	11.0741	7.79303	9.08814	8.11132	10.4944
	43682.1	126	3.71356	9.76203	10.9295	10.4749	8.54513	9.54659	12.5437	12.041	3.13234	8.43155	8.83061	9.53123	4.58212	9.27524	10.5374	9.22147	9.4449	9.73653	12.3046	8.75934	8.72659	8.82421	9.4499	9.11494	4.28731	8.98705	10.0368	9.82508	8.62181	9.49614	9.92996	10.1683	9.09652	8.38144	10.389	10.6492	4.37991	2.74659	10.3485	6.91383	9.29772	6.73073	10.9147	7.8064	9.03716	8.08872	10.5288
	43682.2	128	3.67428	9.514	10.9454	10.5737	8.36432	9.51457	12.6453	11.8534	3.05269	8.07339	8.58547	9.35807	4.51871	8.82178	10.5042	8.91825	9.26438	9.55669	12.1276	8.67228	8.61302	8.63121	9.39258	8.89995	4.22211	8.38259	9.7434	9.77616	8.57467	9.40245	9.76001	10.1654	8.84285	8.24191	10.2926	10.1999	4.33742	2.72799	9.99472	6.93634	9.14187	6.7599	10.655	7.88201	8.7344	8.24774	10.4806
	43682.3	130	3.64114	9.2789	10.7444	10.4039	8.06602	9.33328	12.4684	11.9307	3.01491	7.99019	8.47215	9.03564	4.45883	8.42259	10.4121	8.55879	8.93894	9.3342	12.4714	8.42383	8.48479	8.49955	9.27167	8.63233	4.11869	8.52859	9.81115	9.41888	8.27928	9.20407	9.49968	9.76483	8.76494	8.17109	10.084	10.0472	4.2895	2.69059	9.65017	6.90036	9.02694	6.79704	10.5519	7.86181	8.34656	8.35597	10.2432
	43682.4	132	3.6228	9.26812	10.5767	10.1257	7.88765	9.15485	12.5855	11.8691	3.01103	7.80048	8.07594	8.69164	4.38038	8.35595	10.3601	8.46588	8.78959	8.93937	12.4576	8.32645	8.28244	8.32117	9.20918	8.77239	4.05157	8.03504	9.37552	9.28847	8.21002	9.08065	9.16915	9.64856	8.28029	8.03504	10.1293	9.8381	4.24797	2.69725	9.65708	6.9059	8.72734	6.82998	10.4232	7.94993	8.23313	8.36241	10.211
[truncated: 193 more columns]

## Sheet: Plate 1 Confluence 1
	Vessel Name: 190730_RPE1_KCGS_Plate_1		C3	D3	E3	F3	G3	H3	I3	J3	K3	L3	M3	N3	C4	D4	E4	F4	G4	H4	I4	J4	K4	L4	M4	N4	C5	D5	E5	F5	G5	H5	I5	J5	K5	L5	M5	N5	C6	D6	E6	F6	G6	H6	I6	J6	K6	L6	M6
	Date Time	Elapsed	GSK2336394	GSK2336394	ERK5-IN-1	ERK5-IN-1	GSK312879	GSK312879	PFE-PKIS 40	PFE-PKIS 40	GW513184X	GW513184X	GSK237701A	GSK237701A	GSK2336394	DMSO	ERK5-IN-1	DMSO	GSK312879	DMSO	PFE-PKIS 40	DMSO	GW513184X	DMSO	GSK237701A	DMSO	GSK2373690	GSK2373690	DDR1-IN-1	DDR1-IN-1	GSK336313	GSK336313	GW335962X	GW335962X	GW412617	GW412617	SB-747651A	SB-747651A	GSK2373690	Torin	DDR1-IN-1	Torin	GSK336313	Torin	GW335962X	Torin	GW412617	Torin	SB-747651A
	43676.9	0	13.7122	17.101	23.1076	22.6428	19.7345	16.4019	15.5188	19.9224	17.4451	20.0373	12.5305	13.2122	13.9844	21.2589	19.9918	19.9578	16.2867	16.7017	15.5766	20.8115	15.2408	18.1902	15.8344	16.0724	15.8515	18.1413	22.7525	22.0296	18.7779	16.5687	22.3407	19.2893	21.1675	20.8661	17.9142	16.1418	16.128	17.979	16.1497	23.3996	17.9102	17.5845	13.0465	21.053	20.0851	22.184	13.0341
	43676.9	2	15.9928	18.6455	21.9979	24.0378	20.9901	18.0985	16.1108	23.2006	19.2533	22.2646	13.8525	13.9117	18.8301	21.9694	21.1251	21.2126	18.5599	19.2394	17.0634	22.3847	18.9781	20.8813	15.4581	17.4746	19.0952	20.8888	25.269	24.3808	19.3768	18.5993	22.6195	19.6512	24.0037	22.3213	18.5009	17.0748	19.6996	19.7643	18.9681	23.0891	20.741	19.5036	14.3454	20.4265	22.2452	24.5137	14.0616
	43677	4	18.2906	20.9981	23.8157	24.166	23.8058	19.2354	15.725	21.7261	18.6038	22.253	14.2749	13.8949	20.1497	24.5496	22.3355	23.2788	18.8569	19.582	17.3898	24.272	20.2428	20.4455	17.0666	17.683	21.3723	21.3988	27.2599	26.674	21.3054	18.3753	23.0595	23.0005	27.0533	24.7496	19.5087	17.0311	22.8312	21.037	20.2231	24.1668	22.8073	19.933	15.82	21.5192	24.2045	24.6515	15.6085
	43677.1	6	19.8671	22.5467	26.2012	25.8061	24.7906	20.823	18.6407	22.584	22.2702	24.1343	13.402	13.0988	22.8679	24.4504	26.3353	24.4278	22.0899	22.1027	19.563	25.718	21.8466	24.0499	14.2671	19.1227	23.9793	24.501	30.699	29.3211	23.26	21.1228	26.2353	23.8843	27.5367	26.7555	21.6012	17.8328	25.6221	21.019	23.8595	24.5713	24.819	20.3398	16.6846	24.2739	26.3115	24.3312	17.0764
	43677.2	8	21.5211	25.2882	29.8315	28.6475	24.8074	21.5026	17.8825	22.0153	22.3883	24.6374	12.3562	11.6319	25.901	26.3192	28.6539	26.1537	23.0614	21.9735	19.6444	25.604	23.434	24.6125	13.3478	20.008	23.538	24.8253	33.329	32.2319	22.981	22.8534	27.2876	25.4962	29.3174	28.3504	22.832	22.2699	25.7481	20.8893	25.9786	27.0654	25.2861	21.6028	17.5781	24.635	29.6955	25.4343	17.1856
	43677.3	10	22.4662	26.1731	32.1199	29.075	28.3256	24.6433	18.9313	20.5329	25.7027	27.2455	11.3607	10.765	28.0651	29.606	30.9376	26.221	26.374	25.1651	20.9329	28.3031	26.2889	24.9573	12.4827	21.5562	25.514	27.4542	34.5532	33.1598	26.3551	24.4189	29.4256	26.9808	32.0779	30.5995	25.4017	23.0867	26.3758	24.0697	28.9444	28.7012	28.4506	22.2467	20.5068	24.8495	31.8357	28.4668	20.1694
	43677.4	12	22.8283	28.2698	33.3257	33.003	30.9249	27.5503	20.8266	27.0555	26.8502	28.3602	12.2515	11.3833	27.4506	29.3208	34.3681	28.0353	27.2322	26.9375	23.003	32.2304	29.9392	27.0365	12.8822	22.2767	27.5812	30.4621	36.7999	37.6739	29.0687	25.2904	31.5242	28.2521	34.8025	33.0048	27.931	23.5242	30.1576	23.6597	31.1381	29.4661	29.8023	21.9993	23.1017	26.0474	33.8647	30.2454	19.4788
	43677.4	14	25.1365	31.442	33.8171	36.6424	33.7951	29.5656	19.6231	26.7583	27.9973	31.3083	12.2733	11.8396	30.4112	33.6417	37.8826	30.5813	30.9735	28.3306	23.5153	33.9264	31.3548	30.4448	13.4654	24.798	29.1759	31.2927	39.3657	41.3413	31.1368	29.1366	33.8057	32.0671	36.7045	35.4488	27.293	26.3858	29.3441	25.2538	34.0922	30.0931	32.3232	23.1594	25.4212	27.6914	36.4624	31.4722	23.0601
	43677.5	16	25.4149	31.2974	38.4268	40.2741	36.0615	31.7052	19.3992	25.9334	31.1519	33.6512	13.1176	11.6012	29.2843	33.1513	40.0437	35.5232	31.3493	31.3105	23.8158	37.1071	31.9302	30.5304	14.0295	25.6081	28.1794	32.3516	44.8811	42.9153	33.2228	30.479	37.2912	34.1842	42.0743	40.7717	32.0413	29.8197	30.1133	25.3009	37.0501	32.0319	32.7221	23.8982	27.6887	26.9419	40.0757	33.3765	24.2155
	43677.6	18	28.269	36.0505	47.2718	44.5887	40.4078	33.7152	24.0813	27.2603	35.7212	36.6633	13.145	12.0926	32.79	38.2387	45.4677	38.9139	37.6293	37.7585	26.1614	41.6356	35.8709	38.314	15.2937	31.6653	31.0872	36.0376	51.5999	48.8611	38.6801	35.7437	43.9894	40.3932	46.448	45.3757	37.1043	34.795	32.6443	26.6341	43.604	33.961	40.6731	24.5696	32.9632	29.8686	43.4199	34.1317	28.5488
	43677.7	20	26.0487	37.7419	48.966	44.6604	43.8967	36.2838	22.3104	29.9815	35.712	40.0983	13.1848	12.3602	31.4102	39.3362	47.4051	41.4675	37.7152	37.1348	26.6498	41.833	40.5855	39.7367	14.727	32.3227	29.4094	35.7668	53.9854	52.8308	39.8293	38.5552	46.5658	42.6906	47.9242	45.7856	40.2613	34.3204	33.2116	25.1684	45.1358	33.9255	42.7417	23.5265	33.7761	30.167	49.4208	33.966	35.1213
	43677.8	22	29.1255	38.0965	52.5342	48.7017	45.9661	40.5243	21.7975	27.9966	38.8677	42.7004	12.9062	12.5709	34.0348	42.9253	50.8709	42.4258	41.2903	38.04	26.5521	46.4625	43.797	40.0712	14.9614	32.3974	31.434	38.6624	56.981	56.1321	40.3318	40.6381	48.9677	47.937	53.0982	50.828	41.2112	34.3887	33.1098	25.2692	47.9785	33.3677	45.1757	24.8234	37.239	30.8462	53.0418	34.5189	38.7399
	43677.9	24	27.8857	42.8443	55.38	58.5655	50.7354	46.4863	27.1013	31.6714	40.3045	47.108	12.7624	12.6821	35.1252	42.9419	57.8651	47.6331	46.1394	42.5491	30.2962	50.0886	46.2978	41.5253	15.2646	37.6831	33.2439	41.028	60.1671	62.7019	48.1166	46.5977	53.8935	52.5573	59.0395	55.8671	48.6545	40.5358	33.62	24.6336	53.1069	34.4862	49.3256	24.678	40.3554	31.067	56.6607	35.1724	36.6901
	43677.9	26	30.4803	44.6003	57.7003	57.5527	53.2986	48.6324	23.4964	31.9056	42.9504	50.2774	12.4994	12.8848	35.0818	45.8374	60.321	51.4064	51.4826	46.4092	31.4937	50.6358	51.072	46.8295	15.0525	43.0449	33.5262	40.2798	66.1828	65.2181	49.6347	50.1981	56.2756	56.3493	62.5568	59.6221	49.9623	42.4079	35.7914	24.3656	58.6813	33.5607	54.947	25.8125	46.6501	31.5026	60.5287	35.3247	48.4166
	43678	28	31.454	45.6191	58.6195	64.513	57.8819	51.9247	28.644	30.7128	49.8771	52.5471	12.8719	12.8082	38.2683	50.8597	60.3036	53.4395	51.6207	47.5204	32.032	52.7275	57.5003	53.3723	15.2732	43.6148	34.995	45.8744	68.5311	70.4068	49.2926	53.1035	62.867	61.7724	66.7084	61.1757	52.3952	45.0698	39.0948	23.1157	63.2987	34.0324	56.3251	24.9899	47.276	31.0188	67.1067	35.0117	49.4162
	43678.1	30	33.62	48.0512	65.5904	65.3096	64.5793	56.1493	27.8753	33.3351	55.6496	57.8046	13.1943	12.9945	39.6758	49.7293	63.9345	56.2728	56.7681	50.4107	32.7981	58.9629	57.5403	61.9065	15.677	46.8923	37.7647	47.664	73.5215	73.3519	55.6484	55.5744	69.6927	61.8545	69.6929	66.0952	60.475	54.453	38.9333	22.2054	66.6916	34.3438	60.5834	25.1579	54.6439	30.7995	71.3022	34.8064	55.4187
	43678.2	32	33.743	50.88	63.6366	69.5008	66.0148	60.6687	28.6117	33.1995	58.3183	61.9415	13.4609	13.3404	42.5009	54.7355	74.4448	59.7747	61.9957	54.1539	35.1442	62.9406	68.4528	62.3576	16.0092	46.6676	38.9046	49.7627	77.3947	76.1972	60.8692	58.2186	71.5507	67.133	73.9028	72.1065	64.8706	62.1245	41.0829	21.4763	68.6663	33.1218	65.3775	25.4764	56.9282	30.8626	75.3997	36.2458	61.4991
	43678.3	34	36.2216	54.2686	74.4363	72.9156	69.9488	66.3835	33.0898	34.1875	64.3563	68.1927	13.7286	13.2821	42.0896	55.1159	74.9915	64.3055	66.0565	60.892	32.5839	66.2799	70.1881	68.0078	15.7337	54.7697	39.4978	49.7004	82.3231	81.001	64.8423	61.4983	73.7104	73.8244	78.5153	78.3419	67.3424	57.2142	42.18	21.7522	74.5834	33.7309	69.8463	25.8627	61.7249	31.1609	80.3796	35.898	68.2241
	43678.4	36	36.8134	56.7276	74.8473	76.9975	77.351	69.5185	35.2967	37.6168	64.8248	69.5954	14.9117	13.811	44.4524	56.6799	77.2713	69.0839	70.8178	64.7829	38.2011	71.4092	76.6623	74.4095	16.924	58.1115	40.506	54.6577	84.3685	85.4861	67.8119	65.5443	79.9651	80.0883	82.1092	78.8743	72.4471	72.2592	44.4316	21.1297	77.538	34.2874	72.7594	25.9924	65.2154	31.8168	82.7607	34.6644	72.9397
	43678.4	38	34.3953	62.132	77.8018	79.7436	78.6464	73.3627	36.4796	40.3517	74.5	76.2817	16.186	14.3583	43.1435	63.3543	78.1947	74.8655	75.4615	69.8953	40.8066	76.6224	79.8682	77.8755	18.6088	65.6758	41.3098	56.1667	88.2245	88.5418	70.2287	72.0511	85.8729	81.5975	83.6777	83.0988	76.7672	77.6467	43.3805	20.9286	82.0529	34.5741	78.145	25.1063	71.8196	31.3935	86.1229	35.2891	80.1262
	43678.5	40	37.1257	69.9588	83.6147	85.6109	81.9608	79.3421	35.689	42.0671	80.0854	81.5451	17.4034	15.4237	44.2727	64.3741	82.5365	78.6005	80.6873	75.4829	42.7715	79.0395	82.2945	82.0022	19.48	70.0954	42.1042	56.8746	92.2497	90.1446	78.2783	77.4281	87.9007	86.1066	88.0967	87.3176	79.3654	80.7369	43.7238	20.927	85.4359	33.2548	82.0599	25.9324	76.3893	31.6433	88.3567	36.2838	82.6579
	43678.6	42	38.2101	71.4662	85.5855	84.9818	85.6657	83.1545	39.024	42.1955	81.2962	83.9506	19.5781	16.5503	44.2733	68.9141	85.4283	81.6162	82.4011	76.9555	42.0769	82.871	87.1864	85.9342	22.248	78.7383	41.9974	63.7678	92.9189	91.398	81.4966	82.6607	91.943	87.1936	90.2118	90.8635	84.7592	85.418	42.6505	20.5739	88.1025	33.2403	85.3658	25.7249	79.1692	31.8613	90.8644	37.0562	87.468
	43678.7	44	39.105	77.7647	87.8427	86.359	87.736	85.363	39.9283	41.9221	88.1108	87.2052	19.5337	18.2225	42.511	71.7818	87.5647	85.1287	86.598	79.29	43.0941	85.988	91.8094	90.3713	25.1011	82.02	39.8176	61.5264	93.8169	93.1606	82.3764	84.9161	91.8117	90.6295	91.4796	92.5304	89.0368	87.1174	41.2234	19.9146	89.7843	33.4146	88.4198	25.6575	84.8665	32.7443	92.009	36.2797	88.3085
	43678.8	46	39.9032	79.54	89.0998	88.3124	90.3238	89.4405	42.2776	44.717	88.7614	89.077	21.1281	19.1088	42.7564	79.0446	90.2295	89.8462	90.323	84.8152	45.3231	88.7961	90.6465	91.5303	25.5903	83.1169	38.1625	63.0939	96.4515	94.5593	87.1355	88.0165	94.4737	93.6993	94.1888	93.791	88.8217	87.559	40.0166	19.5771	93.3729	34.1684	90.3109	25.5509	87.4361	32.8695	95.3583	36.5094	90.966
	43678.9	48	38.6119	83.5321	89.4629	91.1674	92.3389	91.3841	40.5448	45.3048	92.0133	90.1666	22.2374	20.849	41.6579	80.3848	91.046	89.7171	91.1851	83.6683	47.8765	89.9058	92.3589	93.0823	28.1886	89.6146	36.8932	66.6757	96.6657	96.9933	88.0866	90.5065	95.9403	95.6302	94.4205	95.0489	90.631	90.2654	37.8963	18.9821	94.0187	34.7397	91.3714	26.057	89.9353	33.812	95.8132	35.7503	93.7196
	43678.9	50	37.7818	85.425	92.8909	92.8848	94.0477	93.8409	47.202	50.2965	94.4226	93.2175	24.2269	19.7848	39.1404	81.4951	92.8298	94.1253	93.6444	90.9155	46.6257	94.5377	95.7455	96.5739	30.2533	92.6127	35.1027	73.4816	98.519	97.6009	90.6805	92.585	96.6144	97.1182	96.7379	96.7005	92.8699	94.074	37.2535	18.5255	96.5064	35.496	93.538	26.8222	93.6012	32.6812	97.5263	35.7013	93.3043
	43679	52	36.4884	85.2792	92.1767	93.5999	95.8262	94.88	46.2807	48.9533	95.0009	94.5937	26.1624	21.7233	38.2713	84.8295	93.2701	95.6044	94.4553	91.6428	47.2511	93.8953	96.0678	97.4216	30.0241	93.4364	34.9988	71.1326	98.5045	98.1338	92.8405	93.0115	97.4363	97.179	97.4969	97.4833	94.189	94.8456	35.7806	18.3914	96.7301	35.1648	93.5164	26.5791	93.8862	33.3751	98.2211	37.0946	95.4414
	43679.1	54	33.8487	88.3283	93.7024	94.3205	97.0925	96.4258	48.7345	50.5383	96.9825	94.1279	25.4864	22.6292	34.022	87.2119	94.166	97.3966	96.7585	92.7018	53.894	95.9178	96.6952	98.2624	30.884	95.9744	33.7444	70.3281	99.2621	98.4452	94.5086	95.2698	98.0337	98.2107	98.3963	98.3549	95.3075	94.4343	34.025	17.6716	97.6546	35.8402	94.62	26.0667	95.5182	33.8811	98.6878	36.7841	96.7361
	43679.2	56	32.6895	90.7866	94.8625	94.0572	98.314	97.5518	45.2011	52.7405	97.8075	96.3625	26.6511	24.353	34.4744	87.0113	94.6219	97.5132	97.3992	93.7335	55.2299	96.8085	98.2457	98.2399	30.5628	96.7878	31.6051	72.4127	99.4078	99.0046	95.4001	97.2411	98.5514	98.7957	99.0689	98.6053	96.7403	96.306	32.5421	16.9929	97.9215	35.0764	96.9991	26.323	96.691	33.5422	98.9649	36.5388	97.8898
	43679.3	58	30.0645	92.053	95.0743	96.2616	98.6761	97.8743	51.9346	54.4083	98.3093	96.8167	27.4314	24.9906	31.2907	91.9969	94.6437	98.3931	98.2755	94.799	57.4052	96.9098	98.4708	98.5025	31.7916	97.5604	32.6409	77.961	99.5421	99.3984	96.9652	97.3187	98.7968	99.3105	99.3648	98.6497	97.3801	95.93	32.9747	16.7442	98.6747	35.6808	97.2689	27.1997	97.8806	34.6951	99.3422	37.8331	98.0516
	43679.4	60	30.2214	93.4235	95.8582	95.6388	99.1926	98.6732	54.4977	57.2793	99.0505	98.035	27.1071	24.7012	30.5682	93.2549	96.1438	99.1833	98.5536	96.2915	56.3129	97.2375	98.5674	99.0262	32.7009	97.6399	31.3207	78.8137	99.7471	99.5196	98.1292	98.3994	99.2957	99.1851	99.5711	99.3357	97.8789	97.3603	31.0535	16.6884	98.9604	36.0441	98.0899	28.2836	98.484	34.9655	99.3705	38.3097	98.3512
	43679.4	62	29.4881	93.5948	95.7826	96.5604	99.24	99.2245	56.1822	57.9081	99.2803	98.6653	27.3577	24.9957	30.9271	94.8886	96.1903	99.4029	99.0948	96.4508	57.2774	97.9542	98.9665	99.2436	32.262	98.7649	30.7326	83.7548	99.738	99.5259	98.7309	98.9384	99.1881	99.5043	99.6963	99.5139	98.0122	97.4615	30.7519	16.1942	99.1708	34.7633	98.6398	28.7698	98.9484	34.8634	99.6741	38.3051	98.8603
	43679.5	64	29.3032	94.8479	96.8656	97.2631	99.5326	99.413	57.0128	58.9439	99.3752	98.3849	27.8112	25.3991	31.2127	95.4904	96.5691	99.4721	99.3608	97.2224	60.231	98.8406	99.1954	99.3979	30.9238	98.7504	31.6353	85.1402	99.8197	99.6135	98.5615	98.9681	99.5247	99.6409	99.7402	99.6978	98.4681	97.6416	29.4215	16.0806	99.227	35.0891	98.7897	28.7026	99.013	35.143	99.6126	39.0237	98.9557
	43679.6	66	28.7126	95.4733	96.9084	97.0454	99.7561	99.4414	56.647	62.1233	99.5233	98.9834	26.3299	25.5645	29.4619	96.3503	96.7125	99.5456	99.7063	98.308	59.1144	98.9575	99.136	99.1714	31.4773	99.2372	28.887	83.5203	99.9427	99.5549	99.0031	99.3349	99.6663	99.7992	99.8135	99.8099	98.6586	98.0515	30.2393	15.904	99.4297	35.4621	99.2043	29.6168	99.2063	35.95	99.6859	39.8866	99.15
	43679.7	68	28.4632	96.1673	97.2876	97.5733	99.8332	99.7082	57.5554	61.8072	99.5711	99.0625	26.9168	25.7924	30.6693	97.4504	96.5301	99.5272	99.7413	98.7062	65.7729	99.1475	99.2011	99.3906	31.3297	99.4416	30.3295	87.0624	99.924	99.5896	99.3223	99.5049	99.787	99.6655	99.8208	99.7531	98.8559	98.1886	29.745	15.7218	99.669	36.5958	99.5301	30.4832	99.5371	36.5154	99.7601	40.9325	99.3442
	43679.8	70	26.6422	96.0595	97.9522	97.7411	99.8688	99.7979	59.9249	64.1227	99.4471	99.1595	26.6688	25.7657	30.958	97.3562	97.4928	99.7271	99.7305	98.4754	65.7202	99.6699	99.5747	99.5429	31.5122	99.4528	28.4925	88.7411	99.8926	99.806	99.6157	99.5406	99.7104	99.7987	99.9054	99.8995	99.0206	98.618	30.267	15.0792	99.6044	36.8144	99.537	30.1556	99.694	38.0277	99.8837	42.3992	99.2099
	43679.9	72	26.4481	96.5147	97.8693	98.0527	99.8952	99.8924	61.3914	65.1312	99.7395	99.2968	27.3726	24.0049	30.0431	97.6323	97.1777	99.7706	99.877	98.657	68.3687	99.4588	99.6486	99.588	29.3283	99.2396	29.9078	89.9417	99.8959	99.8564	99.6256	99.6901	99.8622	99.8301	99.9244	99.8838	99.2435	98.6411	29.5865	14.8217	99.6716	36.6182	99.4099	30.6444	99.8003	37.2759	99.9129	40.9141	99.1573
	43679.9	74	26.8981	97.2093	97.9657	97.8577	99.8918	99.8173	66.0049	67.1183	99.766	99.5504	25.5559	23.5276	30.0115	97.8695	96.8424	99.7734	99.8605	98.6039	69.2688	99.3497	99.4671	99.7296	28.8908	99.3162	29.0678	90.8273	99.9079	99.8407	99.6261	99.8114	99.8866	99.8544	99.923	99.9319	99.1675	98.6378	28.8161	14.4768	99.6431	36.2934	99.6767	30.8546	99.8156	38.7597	99.9283	42.1123	99.3475
	43680	76	27.2868	97.7212	98.5079	98.8052	99.9358	99.8836	68.8679	66.234	99.8167	99.5637	24.8174	23.7562	28.2604	98.3167	97.6766	99.8644	99.9131	98.8487	70.6551	99.6391	99.5459	99.6575	29.5524	99.6407	28.8927	91.9736	99.9667	99.9012	99.5853	99.8266	99.8894	99.8908	99.9103	99.9115	99.2308	98.8454	29.4846	14.2188	99.8286	37.4268	99.8224	31.6368	99.903	39.3417	99.9028	43.5543	99.4722
	43680.1	78	26.7876	97.5981	96.9895	97.9066	99.9465	99.7729	67.1355	69.7297	99.8158	99.3424	27.6213	24.7306	28.8831	98.3967	97.4134	99.9331	99.8939	98.9599	70.9927	99.6131	99.7379	99.7517	28.2643	99.6595	27.1018	91.3335	99.9841	99.9049	99.6125	99.8483	99.8978	99.9405	99.9362	99.9114	99.3195	98.8825	27.5836	14.0882	99.7908	37.5551	99.8263	32.2126	99.9166	39.1168	99.9704	44.3358	99.5701
	43680.2	80	26.4447	98.3093	97.5865	98.5038	99.8682	99.9157	65.2327	69.2024	99.8446	99.4089	27.4673	23.6766	29.9932	98.426	97.5106	99.9116	99.9329	99.3167	72.4466	99.8218	99.507	99.738	27.9437	99.6016	27.0338	93.5349	99.9695	99.9427	99.6461	99.7957	99.9329	99.9411	99.8803	99.8902	99.3311	98.8851	28.4924	13.8938	99.8181	38.4247	99.6889	32.7428	99.9483	39.4854	99.9822	44.6983	99.651
	43680.3	82	25.8442	98.5616	97.7707	98.3384	99.8816	99.9559	70.5038	73.4951	99.7914	99.753	27.2876	24.7031	30.3837	98.9904	98.4799	99.8961	99.8822	99.4197	75.0472	99.7686	99.7552	99.7052	27.5652	99.6714	29.1526	92.4019	99.9785	99.9831	99.4741	99.7987	99.9486	99.9497	99.9471	99.9242	99.4761	99.0342	28.6219	13.8602	99.8289	39.3708	99.9021	33.6925	99.9755	41.2496	99.9904	46.5277	99.7108
	43680.4	84	25.3951	98.3237	97.7224	98.4081	99.8812	99.9164	71.9253	72.1698	99.758	99.5827	26.1913	25.0351	28.7947	99.0804	98.5273	99.9281	99.8852	99.6176	74.6901	99.8524	99.814	99.7483	25.9986	99.5558	26.9551	93.8446	99.9842	99.9775	99.6435	99.7832	99.9263	99.9539	99.9285	99.9322	99.457	98.9045	28.7498	13.9526	99.879	39.4342	99.9237	33.0697	99.9852	40.2316	99.9952	45.5948	99.7014
	43680.4	86	26.1712	98.599	96.7741	98.2282	99.9028	99.9357	73.987	72.0734	99.7842	99.6794	25.9442	23.6122	30.2573	99.1133	98.5725	99.9464	99.9092	99.6964	75.4235	99.8184	99.8394	99.8166	26.056	99.7558	28.1998	93.8946	99.9953	99.9662	99.7109	99.8065	99.9276	99.9608	99.9299	99.9039	99.4618	99.1252	28.9567	13.7187	99.8873	40.1778	99.8894	34.1192	99.9822	40.8081	99.9865	47.6035	99.6876
	43680.5	88	27.2172	98.9484	97.575	98.7828	99.9445	99.9564	75.3755	76.5085	99.8193	99.6231	26.2341	23.8871	29.0296	99.0682	98.7228	99.9518	99.8804	99.6453	79.1671	99.923	99.8679	99.7717	26.9525	99.7133	27.108	95.275	99.9929	99.9936	99.6925	99.7755	99.9619	99.9673	99.9317	99.9099	99.4684	98.948	28.6743	13.9293	99.894	40.9472	99.9662	36.3254	99.9815	44.3561	99.9885	49.6287	99.7472
	43680.6	90	27.696	99.0471	98.5711	99.158	99.8975	99.9752	78.1451	79.6454	99.8297	99.7606	26.5542	23.2117	29.0227	99.1673	98.757	99.9546	99.9035	99.7351	79.8094	99.8842	99.8929	99.7905	27.4545	99.8705	28.5929	96.2951	99.9915	99.9902	99.7992	99.7301	99.9725	99.9731	99.9704	99.9259	99.5254	99.2969	28.7408	13.7622	99.8972	42.876	99.9773	36.6521	99.9846	44.3872	99.993	51.3426	99.9076
	43680.7	92	27.3755	98.8621	98.8769	98.6525	99.864	99.9703	78.4359	79.5949	99.9219	99.7258	24.8382	22.6759	29.9722	99.218	98.6239	99.9838	99.9267	99.8485	81.8334	99.8601	99.9155	99.8016	27.647	99.8387	29.301	96.7332	99.997	99.9909	99.8054	99.7434	99.9543	99.9621	99.9112	99.8711	99.3727	99.2449	29.9202	13.9602	99.8769	42.7463	99.9693	37.386	99.9941	46.331	99.9921	51.5681	99.7891
	43680.8	94	27.2121	98.9209	98.7914	98.6247	99.9047	99.9562	80.3528	82.2094	99.9413	99.859	25.624	23.583	30.7982	99.1752	98.5321	99.9704	99.9295	99.8636	81.7316	99.8639	99.9164	99.8188	26.7246	99.7269	29.7576	96.865	99.9873	99.9887	99.8112	99.791	99.9574	99.993	99.9534	99.9356	99.452	99.3104	29.1926	13.9129	99.9387	42.8112	99.9689	38.0118	99.993	46.9633	99.9964	51.7491	99.8026
	43680.9	96	27.7012	98.9682	98.0515	98.7607	99.8826	99.9604	80.3497	83.1946	99.9359	99.7356	25.0534	23.4038	31.0876	99.4229	98.2252	99.9882	99.9153	99.8366	80.823	99.8961	99.9258	99.7533	26.5512	99.7405	30.7904	96.8102	99.9917	99.9918	99.8611	99.7325	99.9604	99.9839	99.9404	99.9434	99.4331	99.2231	29.2597	14.0442	99.9691	44.2056	99.9758	38.4055	99.9886	48.3484	99.9925	52.8739	99.8241
	43680.9	98	27.2009	99.0125	98.35	98.4087	99.9256	99.9764	79.6929	81.2251	99.9755	99.7986	25.2744	22.84	31.0672	99.4502	98.6114	99.9788	99.9055	99.7813	84.2473	99.9462	99.9471	99.7564	25.9565	99.8025	30.0766	96.4644	99.9941	99.9913	99.8938	99.8437	99.9774	99.9908	99.9648	99.9542	99.5263	99.2329	30.4138	13.1813	99.9759	43.8655	99.9785	39.6434	99.9935	49.6665	99.9952	54.2301	99.8038
	43681	100	29.759	99.1612	98.2314	98.9106	99.9353	99.9654	82.3653	79.4328	99.9468	99.8286	24.9938	22.8872	32.7973	99.2917	98.65	99.9624	99.8819	99.7481	83.4918	99.9173	99.8878	99.7984	26.2277	99.7741	29.276	97.4332	99.9962	99.9906	99.9263	99.9406	99.9557	99.9878	99.9639	99.9527	99.4654	99.2982	30.1493	13.6519	99.9428	45.3533	99.9636	40.1699	99.9863	51.1161	99.9944	53.7877	99.7435
	43681.1	102	29.2374	98.9237	98.5037	98.8935	99.9391	99.9432	82.8488	82.5729	99.9445	99.8548	26.1087	22.2667	31.5416	99.4108	98.9145	99.9854	99.9348	99.8234	85.5255	99.956	99.8666	99.7839	26.3568	99.7744	29.7724	97.9373	99.9847	99.9936	99.9574	99.9792	99.9621	99.9824	99.9408	99.8946	99.4738	99.3717	30.6093	13.2555	99.9274	46.5194	99.9717	41.5915	99.9924	53.2383	99.9987	56.3966	99.797
	43681.2	104	29.88	98.9849	98.5988	98.7626	99.9646	99.9504	83.3627	85.2558	99.9807	99.8236	26.0154	22.2301	32.3348	99.455	98.5043	99.9796	99.9187	99.7761	85.9105	99.9103	99.9096	99.7317	25.8218	99.8209	28.5999	97.5343	99.9914	99.993	99.9652	99.9771	99.9547	99.9946	99.9338	99.863	99.5918	99.3334	29.2947	13.689	99.908	45.8956	99.977	42.0702	99.9949	52.0759	99.996	56.9515	99.8342
	43681.3	106	28.0768	99.1324	97.6134	98.5822	99.9617	99.9082	84.2866	83.4091	99.9592	99.8377	26.2763	21.4684	32.5733	99.4367	98.8304	99.9708	99.8901	99.802	83.7001	99.8971	99.9202	99.8006	26.2509	99.8825	28.892	97.653	99.9866	99.9871	99.9273	99.9625	99.9592	99.9947	99.9755	99.8602	99.5109	99.2888	29.9766	13.113	99.9697	46.6384	99.9742	42.7498	99.9909	55.5066	99.9973	57.782	99.7128
	43681.4	108	30.3735	99.0996	98.8515	98.8176	99.9531	99.8648	86.2746	86.4105	99.9279	99.8952	26.1386	22.1733	32.9923	99.4862	98.8123	99.9595	99.8751	99.766	87.4904	99.943	99.863	99.7387	24.9731	99.857	28.2116	97.7652	99.9949	99.9847	99.9151	99.9898	99.9667	99.9908	99.9745	99.9444	99.499	99.4088	29.4601	13.0196	99.9849	47.3863	99.9599	42.7447	99.9936	55.1787	99.9984	58.21	99.8525
	43681.4	110	28.9523	99.0792	98.7247	99.1128	99.9589	99.9194	86.9895	86.4427	99.9105	99.8698	25.3587	21.9047	31.1901	99.5256	98.6859	99.9775	99.9037	99.8226	88.0173	99.9273	99.8762	99.8502	24.9285	99.8463	28.5199	98.1073	99.9929	99.991	99.9094	99.9168	99.9626	99.9787	99.9575	99.9207	99.5364	99.435	29.3139	13.033	99.9839	47.791	99.9541	45.6662	99.9854	55.177	99.997	58.5339	99.9057
	43681.5	112	28.0241	99.1843	98.6909	99.1156	99.953	99.9582	87.9086	88.451	99.953	99.8938	25.0687	21.8205	33.0469	99.6279	98.9818	99.9608	99.9397	99.7459	89.4197	99.9368	99.8848	99.7684	22.9965	99.8421	29.15	97.8101	99.9812	99.9907	99.91	99.9848	99.9594	99.9921	99.9486	99.9473	99.514	99.346	29.1716	12.5503	99.9844	49.6333	99.9618	45.7426	99.9914	55.8717	99.9982	59.5515	99.8715
	43681.6	114	27.6719	99.4302	98.4614	98.8172	99.95	99.9337	88.1015	88.5552	99.9616	99.854	23.5887	20.951	31.1596	99.5814	98.7119	99.9959	99.9554	99.7917	88.2348	99.9299	99.9079	99.8845	24.4002	99.8583	27.9982	97.6889	99.9519	99.9864	99.9368	99.9943	99.9577	99.9844	99.946	99.9797	99.5513	99.2523	28.3201	12.4924	99.9862	49.1418	99.9745	46.9187	99.9936	57.0421	99.9972	61.9513	99.8706
	43681.7	116	28.3535	99.3838	98.0904	99.0509	99.9185	99.9255	87.7896	87.9065	99.9605	99.781	24.2187	21.779	30.5368	99.5588	99.0878	99.9683	99.9142	99.8584	88.4021	99.9593	99.8578	99.8657	24.0229	99.8907	27.6512	98.3515	99.9442	99.9712	99.8945	99.9789	99.9423	99.9947	99.953	99.9412	99.5678	99.2952	27.2133	12.0269	99.9971	51.3701	99.9738	47.9241	99.9952	58.9343	100	63.9089	99.8944
	43681.8	118	28.2384	99.5148	98.3699	99.1916	99.9386	99.9367	89.9387	89.4705	99.9723	99.9008	24.9666	21.7785	32.3306	99.7048	99.1539	99.9899	99.8563	99.91	88.923	99.9714	99.8673	99.8103	23.6554	99.8043	28.4452	98.658	99.992	99.9906	99.8966	99.9865	99.9834	99.9989	99.9555	99.9435	99.6071	99.4118	28.5669	12.4869	99.9965	52.9008	99.9727	49.4052	99.9958	61.4148	99.9977	64.3366	99.9249
	43681.9	120	27.9974	99.4204	98.1603	98.746	99.8327	99.9497	90.0765	87.6186	99.9327	99.7591	24.6294	23.1175	29.8187	99.6258	98.9393	99.9679	99.8758	99.8581	89.3806	99.9293	99.9305	99.8631	23.6409	99.799	26.853	98.2457	99.994	99.974	99.9327	99.9932	99.9682	99.9936	99.9606	99.9773	99.5808	99.5599	28.1672	12.0675	99.9811	52.9532	99.979	50.2688	99.9818	61.0528	100	65.5841	99.8816
	43681.9	122	28.1887	99.2226	98.0106	99.0043	99.9381	99.8998	90.2358	89.9494	99.9305	99.8551	24.1184	22.6608	30.5581	99.7417	99.293	99.9751	99.8511	99.8086	90.298	99.9594	99.9155	99.8259	23.1734	99.9191	28.2379	98.9759	99.9944	99.9915	99.9267	99.9811	99.9778	99.996	99.966	99.9353	99.6204	99.5133	28.1954	11.5455	99.9845	54.8377	99.9854	51.8256	99.9956	62.0446	99.9994	66.052	99.8885
	43682	124	28.4295	99.341	98.5371	98.6838	99.8603	99.9395	90.6297	91.6813	99.9791	99.8489	23.9352	24.7307	30.6585	99.705	99.3109	99.9767	99.828	99.9145	90.7093	99.9657	99.9385	99.8735	22.0843	99.9269	27.808	98.8072	99.9751	99.9893	99.904	99.9954	99.9796	99.9955	99.951	99.9704	99.6805	99.4723	27.8703	11.5199	99.989	54.8881	99.9579	52.7314	99.9979	63.2306	100	69.3636	99.8767
	43682.1	126	29.0002	99.3572	98.6553	98.9375	99.826	99.8211	90.7887	90.6942	99.9656	99.8826	24.8437	21.909	28.5414	99.7259	99.2524	99.9615	99.8222	99.7912	91.5526	99.8987	99.9299	99.8703	21.8886	99.8302	27.355	98.7785	99.9768	99.9954	99.9404	99.9975	99.9736	99.9955	99.9536	99.9693	99.7304	99.2943	26.9644	11.0688	99.982	57.0153	99.9672	55.0333	99.9938	63.4782	99.9977	70.2986	99.8205
	43682.2	128	28.3409	99.3534	98.614	98.987	99.8921	99.9183	92.3315	91.1913	99.9674	99.8794	24.1286	24.1729	29.0327	99.6953	99.2361	99.9921	99.8751	99.8183	92.5001	99.9661	99.9514	99.8713	23.7097	99.8935	27.3289	98.9224	99.9811	99.9914	99.9487	99.9822	99.9628	99.9868	99.9525	99.976	99.7335	99.394	27.7357	11.4207	99.9882	57.0066	99.9899	56.6325	99.99	65.301	99.9979	70.3917	99.8631
	43682.3	130	27.8156	99.2851	98.6142	99.0531	99.8239	99.8502	92.3582	91.5653	99.9648	99.893	23.312	22.296	29.7132	99.7542	99.201	99.9645	99.9299	99.8808	92.2454	99.9655	99.9705	99.8134	23.9422	99.9285	27.5898	98.9296	99.9678	99.9989	99.98	99.9839	99.9745	99.9959	99.9745	99.9693	99.7264	99.3699	28.1384	11.1857	99.9878	58.189	99.9828	58.3979	99.9944	66.9119	99.9974	71.7667	99.8724
	43682.4	132	26.686	99.4834	99.0992	99.3243	99.844	99.9062	92.0744	91.5649	99.9665	99.9351	23.5319	21.1522	29.2167	99.6565	99.3092	99.9851	99.9283	99.8853	91.9453	99.9635	99.9618	99.8776	24.1002	99.8977	25.981	98.6724	99.9798	99.9964	99.9837	99.9872	99.9712	99.9936	99.9825	99.9857	99.7143	99.5142	27.8419	11.1069	99.9758	59.0563	99.9872	59.4864	99.9934	68.9899	99.9977	73.8035	99.8948
[truncated: 193 more columns]

## Sheet:  Plate 1 Ratio Green_Red 2
	Vessel Name: 190814_KCGS_1		C3	D3	E3	F3	G3	H3	I3	J3	K3	L3	M3	N3	C4	D4	E4	F4	G4	H4	I4	J4	K4	L4	M4	N4	C5	D5	E5	F5	G5	H5	I5	J5	K5	L5	M5	N5	C6	D6	E6	F6	G6	H6	I6	J6	K6	L6	M6
	Date Time	Elapsed	GSK2336394	GSK2336394	ERK5-IN-1	ERK5-IN-1	GSK312879	GSK312879	PFE-PKIS 40	PFE-PKIS 40	GW513184X	GW513184X	GSK237701A	GSK237701A	GSK2336394	DMSO	ERK5-IN-1	DMSO	GSK312879	DMSO	PFE-PKIS 40	DMSO	GW513184X	DMSO	GSK237701A	DMSO	GSK2373690	GSK2373690	DDR1-IN-1	DDR1-IN-1	GSK336313	GSK336313	GW335962X	GW335962X	GW412617	GW412617	SB-747651A	SB-747651A	GSK2373690	Torin	DDR1-IN-1	Torin	GSK336313	Torin	GW335962X	Torin	GW412617	Torin	SB-747651A
	43691.8	0	14.5292	14.8381	15.4485	15.1953	15.2949	15.1724	15.7102	14.5393	15.4867	15.2215	14.9403	14.3138	14.8505	15.5397	15.6556	14.5717	15.0661	15.1	15.2036	14.9311	14.89	14.9049	15.2082	14.9263	14.6087	15.4395	15.2908	14.9358	15.1801	14.9408	15.0792	14.8143	14.9883	14.4499	15.0894	15.1474	14.6535	15.1344	14.9906	14.983	14.6392	15.1321	16.0267	15.0028	15.6458	15.118	15.2704
	43691.9	2	14.8467	15.2078	15.9006	15.6335	15.3185	15.6599	14.6553	13.8806	16.0143	15.5525	16.053	15.0765	14.7884	15.8048	16.0296	14.9358	15.2665	15.4893	14.0548	15.3256	15.3381	15.3261	15.9702	15.1009	14.5515	15.2609	15.4115	15.1143	15.6726	15.2931	15.4466	15.3789	15.2384	15.2173	15.714	15.8996	14.8012	13.8909	15.2358	13.5898	15.0325	14.0421	16.5235	14.2635	15.9347	14.1729	16.0855
	43692	4	14.9455	15.5982	16.2826	16.4033	15.4016	15.7752	13.0635	12.551	16.2241	16.085	16.5742	15.2745	15.4038	15.8365	16.4488	15.2716	15.5134	15.8526	12.6866	15.6891	15.7858	15.525	16.6353	15.2568	14.5374	15.1577	15.8659	15.491	15.9043	15.5452	16.0234	15.8678	15.4495	15.6139	15.9817	16.2595	14.7788	12.4504	15.3767	12.2218	15.4825	12.8223	16.6533	12.9954	16.2767	12.6533	16.3487
	43692	6	15.2528	15.6296	16.9162	16.912	15.6072	16.0007	11.634	11.2334	16.3709	16.1416	16.9615	15.847	15.3344	16.1772	17.0454	15.5009	15.6603	16.0445	11.294	15.8508	16.4196	15.7936	17.2101	15.8969	14.5173	15.2235	15.7074	15.7872	16.1478	16.0341	16.0262	16.3325	16.0135	15.8471	16.459	16.6806	14.7533	10.789	15.901	10.5443	15.5704	11.0681	17.2586	11.0764	16.3109	11.1498	16.8614
	43692.1	8	15.4204	15.7593	17.2948	17.5291	15.6512	16.2503	10.4926	10.1366	16.6606	16.2187	17.1792	16.2037	15.5014	16.2094	17.5036	15.8256	16.0096	16.3141	10.1017	16.3892	16.5488	16.1328	17.3489	15.9838	14.5644	15.2333	15.9935	15.9908	16.5273	16.2488	16.1907	16.9582	16.0522	16.0066	16.6856	17.2241	14.5414	9.44918	15.8636	9.25916	15.7921	9.53892	17.3961	9.69365	16.6131	9.79407	17.4955
	43692.2	10	15.7631	15.9474	17.9956	18.2298	15.9715	16.5057	9.71763	9.45166	17.0263	16.4383	17.4791	16.5847	15.6642	16.3267	17.9474	16.1082	16.3627	16.6278	9.33483	16.8915	17.2342	16.451	17.6196	16.4771	14.3894	15.2835	16.1806	16.1815	16.7473	16.7833	16.823	17.2533	16.6559	16.4745	17.1157	17.9026	14.8562	8.37578	16.287	8.20351	16.2163	8.45622	17.8157	8.69245	17.0351	8.6182	17.8499
	43692.3	12	15.6489	15.9181	18.4052	18.7777	16.078	16.7238	9.10171	8.78789	17.1813	16.8486	17.6227	16.8309	16.0934	16.5807	18.5045	16.395	16.4281	17.0399	8.85314	17.4063	17.7306	16.4248	17.9566	16.8661	14.7462	15.242	16.3059	16.239	16.9396	16.9416	17.5874	17.7054	17.0098	16.9755	17.6695	18.1865	15.0301	7.52224	16.4942	7.3559	16.5424	7.67668	17.9539	7.83946	17.5043	7.78622	18.0297
	43692.4	14	15.9343	16.2521	19.1695	19.8624	16.1888	17.2689	8.78059	8.38961	17.5266	17.2095	17.83	16.8401	15.9748	16.5072	18.9809	16.6022	16.8252	17.222	8.63947	17.4265	18.1881	16.5882	18.0599	17.4082	14.7435	15.3539	16.4049	16.6039	17.259	17.402	18.0585	18.0651	17.5448	17.2159	18.2584	18.3171	15.1993	6.94116	16.6355	6.81862	17.0079	7.07236	18.2211	7.0456	17.5192	7.0898	18.6054
	43692.5	16	16.2694	20.3536	19.7844	20.2296	16.5635	17.4524	8.55151	8.37172	17.9803	17.4514	17.7228	17.1619	16.1719	16.6104	19.3687	16.9167	17.4471	17.6514	8.41124	17.5617	18.5493	17.1735	18.229	17.2642	14.6938	15.4809	16.8185	16.8072	17.6882	17.5796	18.2218	18.46	18.0371	17.5111	18.19	18.9142	15.0799	6.41682	17.0152	6.35343	17.1521	6.638	18.9379	6.53907	17.8807	6.71035	18.9675
	43692.5	18	16.1882	16.6178	20.3197	20.7768	16.9332	17.7849	8.39837	8.17342	18.4828	17.9803	17.8498	17.4282	16.2702	16.8443	19.7574	17.3741	17.723	17.9739	8.46884	18.1781	18.7462	17.2807	18.2888	17.5415	14.6946	15.7705	17.1462	16.9131	18.2147	18.2771	18.7624	19.0788	18.4282	17.9766	18.6238	18.8792	15.4073	6.14795	17.2577	6.01312	17.6284	6.36696	19.4351	6.29649	18.2501	6.36017	19.5834
	43692.6	20	16.1949	16.4974	20.3889	20.6684	16.9142	17.7142	8.14856	8.0384	18.3725	17.7832	17.524	17.0207	16.283	16.8551	19.8117	17.4589	17.7494	18.4208	8.39659	18.1779	19.3108	17.174	17.9137	17.6722	14.7569	15.6407	17.3515	17.2024	18.5165	18.3745	19.015	19.9494	18.8466	18.6771	19.1117	18.8821	15.2812	5.73635	17.6163	5.61804	17.9646	5.90114	19.7901	5.9203	18.4941	5.85924	19.8069
	43692.7	22	16.3847	16.6786	20.777	21.3249	16.9249	18.0271	8.08453	8.14936	18.6629	18.0073	17.2594	16.7801	16.5721	16.826	20.2487	17.762	18.0705	18.678	8.38453	18.7508	20.0135	17.5208	17.6587	18.1069	14.5753	15.7347	17.4288	17.5981	19.0258	18.9245	19.9764	20.5847	19.6896	18.7403	19.7196	19.1825	15.2792	5.47888	17.9381	5.37392	18.3594	5.6654	20.3596	5.65161	18.8633	5.56975	20.6282
	43692.8	24	16.5352	16.9549	21.2237	21.4687	17.3689	18.2167	8.19442	8.35045	18.8429	18.1515	17.0165	16.5807	16.4628	16.7319	20.1123	17.958	18.3295	19.2786	8.55962	19.4657	20.748	17.8467	17.3734	18.3836	14.638	16.1693	17.8453	17.7191	19.6245	19.7669	21.4083	21.8946	20.1235	19.7579	20.3738	19.6084	15.2882	5.27971	18.3596	5.13392	18.6486	5.52354	21.0603	5.38303	19.5013	5.43077	20.9914
	43692.9	26	16.7924	17.1749	21.4672	22.0361	17.6537	18.5162	8.34922	8.32977	19.2676	18.3789	16.7581	16.3201	16.7449	16.9345	20.349	18.349	18.5549	19.9784	8.76161	20.091	21.3012	18.6166	17.0546	18.7484	14.7597	15.932	18.5832	17.7966	20.6345	20.4722	21.9485	23.3188	21.0649	20.4221	20.4734	19.7962	15.4913	5.23634	18.5837	5.11484	19.0989	5.35736	22.119	5.23738	20.5395	5.26016	21.5185
	43693	28	16.7677	17.277	21.6748	22.3092	17.8415	18.6888	8.61148	8.5466	19.8293	18.3141	16.5007	15.9677	16.7737	17.1648	20.6244	18.5426	18.8719	20.4347	8.93775	20.4052	21.5327	19.034	16.7659	19.2513	14.7123	16.0239	18.3831	18.3196	20.895	20.9408	23.234	23.4595	20.7686	21.0409	20.5536	20.1604	15.6073	5.1859	19.4031	5.04434	19.7536	5.30234	22.4753	5.18749	20.4868	5.24651	21.486
	43693	30	17.3319	17.3992	21.8831	22.6277	18.2364	18.9538	8.78303	8.78579	19.7571	18.8443	16.1746	15.6147	16.8192	17.3272	20.7202	18.9926	19.7319	20.2374	9.18101	20.1943	21.634	19.5472	16.309	19.3333	14.9738	16.2514	18.911	18.7523	21.458	21.1507	23.4842	23.4544	21.6313	21.2111	21.052	19.9367	16.0817	5.20913	19.8573	5.03394	20.1275	5.31633	23.1767	5.14141	20.8061	5.22176	21.9109
	43693.1	32	17.5233	17.6368	22.1591	23.3466	18.5074	19.2767	8.98706	9.01546	20.5558	19.0396	15.8072	15.2419	16.8411	17.5028	20.8674	19.6726	19.7416	20.7947	9.48922	20.5602	21.2166	20.0473	15.8683	19.7178	14.9723	16.3737	19.2834	19.455	21.4421	21.989	23.1621	23.2633	22.0003	21.0842	21.7868	20.7156	16.108	5.15469	19.8937	5.12586	20.5455	5.33528	22.8149	5.21317	21.4311	5.14896	22.2769
	43693.2	34	17.8728	18.0699	22.2832	23.2509	18.9617	19.5972	9.2264	9.34337	20.5484	19.5343	15.5578	14.9107	17.352	18.2336	20.9095	19.6834	19.8467	21.2416	9.6338	20.7854	21.8587	20.1452	15.4378	20.0186	15.2489	16.7129	19.1845	20.2341	22.1417	22.2911	23.9208	23.5078	22.2524	21.5631	21.47	21.0825	16.5819	5.1899	20.4068	5.13551	20.8091	5.37033	23.2294	5.25847	21.5256	5.16269	22.7854
	43693.3	36	17.8572	18.4749	22.4835	23.4932	19.2657	19.6538	9.51148	9.59583	20.2468	19.6665	15.0593	14.502	17.7903	18.3219	21.4221	20.4237	20.2879	21.0238	10.0434	21.02	22.2081	20.3968	15.1141	19.9054	15.3806	17.2135	20.1058	20.4024	22.5592	22.1316	25.3371	23.5711	22.1699	22.0225	21.6874	21.4225	16.5809	5.25085	21.38	5.27341	21.1923	5.46174	23.3051	5.26813	21.9893	5.25466	23.1631
	43693.4	38	18.0908	18.7238	22.4016	23.4007	19.8034	19.9283	9.87121	9.87891	21.053	19.9873	14.7551	14.0965	17.5205	18.7439	22.1549	20.9511	20.9373	22.2256	10.3263	21.5704	22.165	19.7737	14.6904	20.7795	15.3685	17.212	20.5708	20.6918	22.9954	21.9702	24.5425	23.9827	23.1312	21.9017	21.726	21.0248	16.8762	5.31525	21.2189	5.42934	21.3063	5.51572	24.5567	5.34259	21.9002	5.32673	23.2688
	43693.5	40	18.4913	19.4413	23.5586	24.5126	20.0305	20.8291	10.1159	10.3906	20.3938	20.3111	14.6576	14.0113	18.1599	19.1521	22.3088	21.1446	21.2047	21.5184	10.6732	21.1625	22.3772	20.4323	14.4584	20.4637	15.3655	17.377	20.8551	21.2543	23.533	22.3917	25.309	23.9862	22.9772	22.1568	21.8314	21.2061	17.3123	5.48999	21.9132	5.60755	21.2918	5.72716	24.8268	5.48983	22.355	5.48186	22.5456
	43693.5	42	18.3122	19.7994	23.2443	24.0718	20.1857	20.4552	10.3583	10.429	20.988	20.2459	14.3099	13.6583	18.5783	18.6213	22.399	20.8556	21.2345	22.2893	11.1328	21.1338	21.5849	20.924	14.1303	20.6342	16.0161	18.1165	21.2586	21.7523	22.9219	22.6619	24.2078	23.7555	22.5014	22.4193	22.2485	21.0296	17.5187	5.59969	21.9462	5.78315	21.7086	5.8328	25.182	5.58342	22.6471	5.56526	22.3942
	43693.6	44	18.4853	19.6304	23.1708	23.7558	20.2379	20.4531	10.6114	10.6922	21.7995	20.736	13.9999	13.327	18.337	19.2153	22.7719	21.1732	21.4469	21.545	11.3586	21.7757	22.4603	20.7257	13.8699	20.7377	16.1302	18.1323	21.661	22.3092	23.2847	22.4667	24.2028	24.0006	23.2938	22.7299	21.4444	21.2654	17.602	5.7408	21.7605	5.943	21.9803	5.97108	23.8368	5.73619	22.4596	5.70366	21.8226
	43693.7	46	18.8307	19.7585	23.1722	23.326	20.0562	20.5981	10.952	10.9032	21.884	20.5925	13.7366	12.97	18.1078	19.2948	21.6983	20.2881	21.3708	21.805	11.8906	22.0325	21.9598	20.4378	13.5954	20.5034	16.312	18.4862	21.5287	21.8318	22.7339	22.1432	23.5476	24.2294	22.1265	22.4742	21.553	21.2565	17.6058	5.84008	22.2695	6.01727	21.7764	6.04656	23.4591	5.81695	21.9723	5.75809	22.3583
	43693.8	48	18.6766	19.6868	22.7247	22.8402	20.3733	20.741	10.9833	11.2235	21.2473	20.83	13.3932	12.6625	18.3564	18.9518	21.8894	20.6374	21.1845	21.5636	11.7808	21.4139	22.3792	21.0602	13.28	21.0572	16.5877	18.5351	22.0612	22.318	22.467	22.2075	23.3829	23.0516	22.1202	22.8877	21.1721	20.9524	17.8541	5.95191	21.7123	6.11143	21.785	6.14455	23.5981	5.92491	21.7445	5.88084	22.0114
	43693.9	50	19.6311	20.1379	23.158	22.8329	20.6905	20.5092	11.249	11.145	21.8731	20.2339	13.2763	12.4046	18.9002	20.0135	21.8551	20.166	21.2974	21.6992	12.041	21.7897	21.488	20.854	13.027	20.5767	16.5568	18.5442	22.0788	22.3054	22.2449	22.6631	24.0699	23.3741	22.7894	22.2328	21.1669	21.0982	17.7562	6.06685	21.5662	6.25442	21.879	6.17624	22.8038	6.00832	22.5633	5.91568	21.7412
	43694	52	19.1524	20.2782	22.5211	22.2206	20.1549	20.794	11.3544	11.4944	21.3967	20.7008	13.0878	12.2128	19.1094	20.2066	21.197	21.1857	21.1572	22.629	12.1692	21.0311	21.1097	21.1517	12.8404	20.6647	16.5822	18.5347	21.8809	22.2588	22.2574	22.5705	23.9673	23.7219	22.732	23.0878	21.1418	21.2039	17.9798	6.06763	21.6091	6.31758	21.8806	6.22784	23.11	6.06402	22.1795	6.0055	21.3776
	43694	54	18.8332	20.113	22.3876	22.5905	20.505	21.1141	11.5757	11.6509	22.0168	21.527	13.0005	12.175	19.0929	19.753	21.2974	20.6728	20.91	21.4532	12.3233	21.0878	21.4632	21.2267	12.7004	21.0266	16.8124	18.5377	21.7221	22.4579	22.2438	22.667	23.1498	22.7103	22.1083	22.4903	20.826	21.0999	17.9725	6.21612	21.4954	6.46091	22.2884	6.31067	22.9008	6.16987	22.6952	6.10429	21.5898
	43694.1	56	18.7989	20.261	21.7678	21.8776	20.3782	20.5104	11.8736	11.6891	21.9537	19.9943	12.6845	12.0865	18.6771	19.537	20.9736	20.5089	21.1727	21.2801	12.2591	20.5102	20.7493	20.737	12.5876	20.8629	17.0372	18.4359	22.1087	22.2406	22.2045	23.3634	23.3611	22.1452	21.6044	22.8878	19.9586	20.0829	18.4182	6.29229	21.3752	6.56843	22.0965	6.4083	22.9938	6.20432	22.2358	6.12465	20.7637
	43694.2	58	19.108	20.4901	21.2901	21.3502	20.0878	20.1007	11.8764	11.8367	21.4465	21.5543	12.7824	12.0291	19.1936	19.6839	20.8573	20.6168	21.1092	20.9533	12.3411	20.0009	20.4093	20.6389	12.5163	20.6342	17.1832	18.5815	21.5702	21.797	21.6513	22.4457	23.3798	21.446	21.2014	22.399	20.2988	20.5982	18.0136	6.31927	21.1636	6.67576	22.3517	6.54852	22.6344	6.27052	22.3855	6.27429	20.798
	43694.3	60	19.4349	20.5136	21.4717	20.562	20.1463	19.9752	12.1149	11.9957	21.3259	20.5389	12.6594	11.8703	18.6901	19.2089	20.105	21.1918	20.1925	20.3278	12.4026	19.2345	20.1228	20.2346	12.3641	19.8674	17.0134	18.9838	21.6279	21.4343	21.7941	22.2619	22.3779	20.6158	20.7425	22.4164	19.6709	20.3389	18.3254	6.38273	21.1876	6.72525	22.1662	6.68208	20.8015	6.32618	21.7063	6.321	21.029
	43694.4	62	18.4808	20.3236	20.9788	20.1019	19.8795	19.8262	12.0769	11.9908	20.8502	19.9766	12.7347	11.7405	19.1264	19.0498	19.7297	20.39	20.354	19.1594	12.6529	19.3532	19.8354	19.4603	12.3671	19.6719	16.9182	18.7198	20.9568	21.5008	21.2999	21.9366	21.2706	21.4338	19.9925	22.4918	19.3525	19.7043	17.9329	6.4019	21.5544	6.7907	21.5689	6.71356	22.1659	6.42436	21.1279	6.43663	19.9853
	43694.5	64	18.551	19.6274	20.1422	19.2429	19.7309	19.4714	12.1784	12.1947	20.8654	19.1499	12.634	11.5928	19.266	19.3394	19.6441	19.8166	20.0256	19.4858	12.632	18.788	19.4175	20.22	12.203	19.4388	16.9559	18.7899	21.447	21.6501	21.0659	21.0282	21.3877	20.0143	20.6657	21.4438	19.1896	19.5695	17.7619	6.51516	21.1584	6.87782	20.8151	6.84103	21.0672	6.52908	20.5394	6.50042	20.0038
	43694.5	66	19.0829	19.9305	19.197	18.6052	19.2686	18.7229	12.2083	12.0952	19.9393	20.0531	12.6124	11.6175	19.555	18.9929	18.9076	20.1777	20.0943	18.8845	12.5954	18.0145	18.6162	18.735	12.3468	18.9123	17.132	18.8739	21.6396	21.8427	20.4802	20.2877	21.5217	19.4438	19.1299	21.6819	18.9136	19.8339	17.8135	6.54538	21.0757	6.9156	20.5793	6.89445	21.3299	6.54681	19.9168	6.63655	19.2785
	43694.6	68	18.6171	20.3316	19.7282	17.7498	19.6583	19.0224	12.4429	12.5308	19.7005	19.4242	12.6637	11.7243	19.8922	18.9282	18.65	19.0807	19.6098	18.7361	12.8226	17.5503	18.437	19.612	12.4036	18.3397	17.5808	18.6954	20.4938	21.7606	20.1471	19.8642	20.4307	19.354	19.5364	20.7046	18.8532	19.4116	17.9222	6.64553	20.7583	7.05423	19.7484	7.05257	21.2098	6.70978	19.5173	6.73143	19.1844
	43694.7	70	18.1751	19.724	18.9299	16.9993	19.4559	19.4512	12.4786	12.475	18.656	19.0791	12.4359	11.5346	19.0048	18.1069	17.7679	18.972	18.9931	17.9785	12.8015	16.6693	17.5959	19.173	12.2936	18.5115	17.6794	18.7496	20.5956	21.4866	20.0676	19.3242	20.4397	19.1328	18.9119	20.051	18.5671	19.1612	18.1041	6.64052	20.4501	7.0177	18.8722	6.98795	20.6385	6.7349	19.4874	6.71666	17.8822
	43694.8	72	18.3408	20.213	18.2973	16.5034	18.7085	19.1257	12.5137	12.37	18.1859	18.6303	12.3434	11.5269	19.7391	17.9335	17.4826	18.494	18.911	17.2674	12.7938	16.5629	16.8373	18.443	12.2394	17.9847	16.8882	18.7283	20.5507	20.8543	19.3525	18.6462	19.6434	18.5297	17.8761	20.0539	17.6996	19.0783	17.9842	6.70144	19.8384	7.1003	18.7679	7.05214	19.757	6.74198	18.1051	6.75799	18.1745
	43694.9	74	18.281	20.316	17.3416	16.0964	18.2375	18.3709	12.5461	12.2194	17.7049	17.7391	12.3005	11.5665	18.8921	17.5152	16.5772	17.5004	17.8752	16.5342	12.9305	15.881	16.4999	17.4132	12.2307	16.9883	17.035	18.0996	19.8895	20.3117	18.4682	17.8262	18.4952	17.4707	17.129	19.6983	16.9981	18.4	17.5145	6.6995	19.4671	7.15423	17.5595	7.10298	19.086	6.80211	17.7588	6.76998	17.2873
	43695	76	17.9115	19.6059	16.959	15.0655	17.6216	17.8686	12.5143	12.2253	17.5836	17.2942	12.2147	11.5355	18.2886	17.2404	15.8752	17.2752	18.082	15.9145	12.938	15.4252	15.5427	17.1113	12.2381	16.7555	17.0046	17.3316	20.347	20.3498	18.3053	17.1471	17.8603	16.86	16.623	18.107	16.996	17.7011	17.5529	6.7385	19.3627	7.14138	17.7877	7.2225	18.2405	6.84012	17.1201	6.83855	16.8793
	43695	78	17.5579	18.673	16.3921	15.2104	17.6412	17.6575	12.5113	12.3574	16.6391	16.6483	12.0537	11.5224	18.5337	17.0297	14.883	16.5461	17.5709	15.399	12.6549	14.4244	15.173	16.6494	12.2589	16.097	17.2804	17.7455	18.74	20.1731	17.8162	16.3462	17.473	16.5225	16.1013	18.0677	15.8225	17.16	17.8345	6.80542	19	7.22505	16.7073	7.26515	17.5497	6.92206	16.8897	6.91874	16.304
	43695.1	80	17.4406	18.006	15.7521	14.1527	16.7798	16.4877	12.4944	12.625	16.4111	15.9416	12.0974	11.5478	17.6418	16.5322	14.9522	16.0426	16.8074	14.7532	12.8472	13.8651	14.4157	16.6428	12.2222	15.3017	16.2842	17.5871	18.2151	19.216	17.1263	16.3347	16.472	15.8679	15.3885	17.5458	15.9925	17.0709	17.3248	6.82773	18.3214	7.31724	15.5655	7.33319	17.0404	6.97534	15.9683	6.91908	16.2555
	43695.2	82	17.3998	18.0647	14.6666	13.5791	16.5009	15.9724	12.4544	12.712	15.6924	15.5445	12.085	11.5388	17.8354	16.2041	13.9699	15.0022	16.122	14.367	12.5983	13.781	14.0521	15.758	12.1437	15.0497	16.81	17.1936	17.9982	19.2787	16.7741	15.3421	16.1135	15.9844	14.887	16.7689	15.7271	16.5728	17.0707	6.85936	17.7461	7.3098	15.746	7.43126	16.5599	6.98483	15.5117	7.04986	15.5986
	43695.3	84	16.2632	17.6541	14.4108	13.1953	15.4414	14.8793	12.3599	12.5528	15.0879	15.3833	12.1145	11.4353	17.7137	15.6554	13.7269	15.0307	15.5211	13.644	12.6451	13.3087	13.9265	15.5815	12.2129	13.8915	16.852	17.1361	17.5376	18.9976	15.8923	15.2352	15.5544	15.2499	14.5635	16.012	15.1715	16.4817	16.6233	6.8917	17.0923	7.34671	14.8935	7.44102	16.025	7.07524	15.1562	7.05231	15.394
	43695.4	86	16.4086	16.9659	13.5832	12.4315	15.1666	14.4349	12.2789	12.69	14.5546	14.65	11.8964	11.305	17.4111	14.865	12.9841	14.3919	15.0925	13.6364	12.4379	13.1572	13.215	14.492	12.0477	13.837	16.6076	16.4865	16.6925	18.1842	14.7585	14.6286	15.1866	14.8943	13.7511	15.5034	15.0594	15.6974	16.713	6.88001	16.763	7.40059	14.6824	7.52939	16.0493	7.17527	14.5275	7.1466	14.7552
	43695.5	88	15.9467	16.3539	13.1926	12.2982	14.4901	13.6507	12.4339	12.6293	13.7864	14.1566	11.8821	11.2562	16.6255	14.5706	12.8011	14.025	14.1426	13.0561	12.4261	12.8507	12.643	14.2013	11.7638	13.2682	15.6241	16.1207	16.2838	17.583	14.0944	14.1745	14.8791	14.6248	13.5605	14.5323	14.404	15.1123	15.8109	6.86241	16.2267	7.48007	13.9141	7.56353	15.402	7.16804	14.0249	7.20163	14.6791
	43695.5	90	15.1781	15.8372	12.9003	12.2352	13.6789	13.5297	12.3417	12.6105	13.383	13.6643	11.731	11.0722	16.3024	14.3244	12.48	13.4781	13.6211	12.6498	12.4309	12.7277	12.3568	13.949	11.6751	12.9333	15.7514	15.7757	16.0982	17.4578	13.9844	13.7311	14.3779	14.1015	12.849	14.1831	14.1676	14.8462	15.8209	6.8641	15.3172	7.5207	13.5125	7.61028	14.9391	7.1933	13.3981	7.23534	14.5894
	43695.6	92	14.7268	15.3121	12.62	11.8305	13.3435	13.1609	12.3038	12.6518	13.3975	13.6428	11.7672	11.0851	16.1063	13.8983	12.0541	13.0421	13.4569	12.4335	12.3892	12.3773	12.1509	13.4184	11.6815	12.567	15.5002	15.262	15.931	16.8273	13.9189	13.3608	14.1399	13.974	12.4456	13.8966	13.8202	15.1052	15.1111	6.84408	15.1659	7.56995	13.5219	7.6584	14.5826	7.35886	12.9745	7.34607	14.2727
	43695.7	94	14.7919	14.6608	12.3367	11.6582	13.0873	12.7512	12.3038	12.2568	13.1776	12.989	11.5093	10.883	15.6537	13.5489	11.6416	12.571	12.7996	11.6879	12.184	12.0811	11.6085	12.9619	11.407	12.2374	15.1806	14.5989	15.2287	16.0147	13.3657	13.155	13.5968	13.6065	12.2699	13.404	13.4216	14.2806	15.0192	6.82916	14.8731	7.59859	12.6478	7.67664	14.5498	7.32573	12.7449	7.40221	14.2976
	43695.8	96	14.2248	14.555	11.6151	11.4911	12.8059	12.219	12.1335	12.2846	12.8195	12.7666	11.4317	10.8396	15.0422	13.4003	11.1949	12.2621	12.6388	11.6395	12.1863	11.8316	11.0673	12.9392	11.2763	11.9037	15.0542	14.5576	14.942	15.7242	12.9273	12.9974	13.1121	12.885	11.8819	13.1308	13.3646	13.8825	14.7889	6.83369	13.9613	7.65044	12.913	7.70477	13.6256	7.39567	12.5871	7.4358	14.1634
	43695.9	98	13.9636	14.138	11.667	11.3397	12.1361	12.1693	12.1019	12.2908	12.2304	12.529	11.2664	10.7143	14.4574	13.1725	10.9807	12.1874	12.1679	11.448	11.9724	11.2694	11.196	12.3235	11.0563	11.5703	14.9378	13.9615	14.5651	15.3425	12.5661	12.4397	12.8367	12.9025	11.3547	12.6739	12.8091	13.6741	14.6946	6.85292	14.1964	7.61723	12.6414	7.7436	13.6146	7.45221	11.927	7.46984	13.3947
	43696	100	13.7946	13.6836	11.5584	11.1017	12.1753	12.112	12.1367	12.3099	11.8375	12.0301	11.1502	10.8096	14.2175	12.7407	10.7606	11.9532	11.8793	11.2397	12.0627	11.031	10.708	12.2166	11.0272	11.2864	14.4256	14.2279	14.087	14.8446	12.262	11.9792	12.953	12.4329	11.2286	12.322	12.912	13.2235	14.1322	6.81842	13.1322	7.65599	12.0242	7.77337	13.2156	7.42956	11.6099	7.47821	13.6659
	43696	102	13.1883	13.731	11.0552	10.9802	11.6518	11.5435	11.9996	12.2993	11.5815	11.5746	10.9759	10.5677	13.9767	12.5255	10.7651	11.7457	11.6117	10.8219	12.0912	10.8451	10.0945	11.6545	10.6997	10.7045	14.1274	13.7751	14.2676	14.6271	12.3373	11.5578	12.4473	12.2454	10.8432	12.0516	12.7374	13.0312	13.351	6.71584	12.6792	7.63547	11.8819	7.8744	12.8758	7.51558	11.2658	7.59521	13.2631
	43696.1	104	12.9532	13.1377	10.845	10.724	11.2787	11.281	11.8629	12.1265	11.2481	11.413	10.8271	10.6326	13.5742	12.1936	10.6861	11.3937	11.5739	10.7527	11.966	10.5025	10.0311	11.6526	10.6747	10.6553	13.8785	13.627	13.4611	14.2344	11.8832	11.5057	12.4574	11.7386	10.6083	11.8223	12.8301	12.8446	13.6755	6.69484	12.6391	7.69862	11.5597	7.82722	12.8501	7.58892	10.9756	7.67661	13.1651
	43696.2	106	12.7515	12.8958	11.0125	10.6226	11.0299	11.3888	11.8522	12.1331	10.9995	11.2973	10.5822	10.6497	13.092	12.0215	10.3796	11.0186	11.0337	10.7661	11.8767	10.4094	9.5455	11.3897	10.5177	10.3395	13.8338	13.0746	13.2047	13.4048	11.778	11.488	12.2191	11.3074	10.2421	11.3945	12.2879	12.7416	13.228	6.65407	12.1768	7.73039	11.492	7.90371	12.7278	7.63597	10.9592	7.76727	12.805
	43696.3	108	12.3229	12.8587	10.7044	10.3789	10.7683	10.9947	11.8215	11.9475	10.7978	10.8456	10.3684	10.5466	13.0412	11.8989	10.33	10.8305	10.7023	10.2315	11.88	10.1414	9.67613	11.2931	10.4109	9.91838	13.6968	12.7876	13.0548	13.3188	11.6891	11.0945	11.8456	11.2577	9.99563	11.4644	12.1022	12.7967	12.7862	6.62896	11.9718	7.7738	11.2919	7.87659	12.2795	7.70646	10.8021	7.75233	12.3572
	43696.4	110	12.0696	12.55	10.5065	10.0938	10.7541	10.7973	11.8712	11.6206	10.3653	10.3629	10.1368	10.4538	12.3041	11.6133	10.0846	10.7293	10.8675	10.1245	11.6645	9.77012	9.31798	10.8478	10.2699	9.68694	13.349	12.2432	12.7549	13.0477	11.3522	10.724	11.5048	11.1487	9.80558	10.8014	11.8659	12.4358	12.9631	6.6213	12.0588	7.8107	11.4188	7.96803	11.8516	7.74611	10.5177	7.82203	12.2598
	43696.5	112	11.7233	12.0764	10.3048	9.99804	10.7317	10.3911	11.8093	11.703	10.0672	10.2634	9.97191	10.211	12.2459	11.3988	10.1133	10.8034	10.7511	10.0313	11.6515	9.88968	9.12159	10.5274	10.2531	9.72179	12.8621	12.3469	12.4339	12.8044	10.9937	10.3858	11.3826	10.8506	9.66964	10.3066	11.8975	12.1992	12.5991	6.59327	11.8951	7.85758	10.9533	8.01401	11.6775	7.7509	10.3283	7.9111	11.9566
	43696.5	114	11.4795	12.0737	10.2663	9.85859	10.4321	10.3239	11.7166	11.5157	9.87371	9.96194	9.86512	10.119	11.4732	11.0618	9.97632	10.6989	10.5182	10.0152	11.7321	9.68482	8.69683	10.3153	10.0647	9.57985	12.7233	12.1741	12.1491	12.3761	10.9477	10.1471	11.2355	10.4562	9.51581	10.3591	11.4989	12.2246	12.4397	6.58343	11.3301	7.84973	10.789	7.95708	11.5141	7.77488	10.0869	7.89173	11.7492
	43696.6	116	10.9851	12.1961	10.2623	9.71961	10.0049	10.2379	11.8205	11.4068	9.60922	9.70976	9.72132	10.1527	11.626	11.0233	9.82378	10.3823	10.6989	9.74324	11.702	9.57975	8.49995	10.3447	9.93664	9.31247	12.5277	11.8269	11.5969	12.0689	10.7335	10.1328	11.3827	10.2623	9.42423	10.0446	11.5049	12.0615	12.3382	6.50962	11.0839	7.95689	10.5261	8.07787	11.3633	7.87203	9.8629	8.06041	11.8066
[truncated: 193 more columns]

## Sheet: Plate 1 Confluence 2
	Vessel Name: 190814_KCGS_1		C3	D3	E3	F3	G3	H3	I3	J3	K3	L3	M3	N3	C4	D4	E4	F4	G4	H4	I4	J4	K4	L4	M4	N4	C5	D5	E5	F5	G5	H5	I5	J5	K5	L5	M5	N5	C6	D6	E6	F6	G6	H6	I6	J6	K6	L6	M6
	Date Time	Elapsed	GSK2336394	GSK2336394	ERK5-IN-1	ERK5-IN-1	GSK312879	GSK312879	PFE-PKIS 40	PFE-PKIS 40	GW513184X	GW513184X	GSK237701A	GSK237701A	GSK2336394	DMSO	ERK5-IN-1	DMSO	GSK312879	DMSO	PFE-PKIS 40	DMSO	GW513184X	DMSO	GSK237701A	DMSO	GSK2373690	GSK2373690	DDR1-IN-1	DDR1-IN-1	GSK336313	GSK336313	GW335962X	GW335962X	GW412617	GW412617	SB-747651A	SB-747651A	GSK2373690	Torin	DDR1-IN-1	Torin	GSK336313	Torin	GW335962X	Torin	GW412617	Torin	SB-747651A
	43691.8	0	19.2072	14.6529	19.2741	16.3637	19.7168	17.7683	22.3272	16.3299	25.1996	17.061	21.4022	16.3542	17.7656	18.0278	15.2544	19.8996	17.3042	23.8503	24.62	20.6668	25.9688	21.4782	18.5196	22.2455	17.0897	15.9864	21.1641	17.3521	21.3953	19.7249	26.8168	24.3611	29.7653	22.6248	22.6794	17.1312	18.939	20.4098	21.8675	23.0562	15.6364	23.3673	20.5016	24.867	22.6974	22.1378	20.7959
	43691.9	2	20.2397	17.158	20.5705	17.6443	20.7323	19.7815	22.2741	18.7739	26.5505	18.7102	22.4946	16.4824	19.3649	19.0115	16.1408	20.104	20.5558	23.9884	25.7101	24.1974	27.6331	20.4874	21.0827	22.777	17.5671	16.6286	22.1115	19.2087	22.5964	22.2902	29.2276	25.3431	30.2053	23.4361	23.6407	18.8978	20.7262	22.8451	23.5433	25.7305	17.4809	25.2866	23.4618	26.1862	24.5841	23.0975	22.0242
	43692	4	21.2467	18.4881	20.6474	19.0997	22.5682	21.7233	24.3357	18.6152	29.1592	19.7955	21.1678	17.166	20.9151	20.2303	17.2575	21.7477	20.9415	26.0402	27.4089	26.2341	30.2396	23.0202	20.6992	26.1183	18.8044	18.3253	23.3566	20.581	24.3693	25.1431	30.6684	28.043	34.404	25.352	25.2851	20.1174	21.9466	23.6865	25.838	26.2231	18.4844	26.094	25.6387	25.8161	26.7942	23.7445	23.5123
	43692	6	24.2863	19.7663	22.3797	21.1822	23.5572	24.2595	24.5565	22.0346	32.7955	22.3474	19.7197	15.3302	23.7567	21.8423	18.2366	24.2794	23.9496	28.0421	28.4139	28.5548	32.8154	24.7376	18.9562	27.6257	21.2647	20.1213	26.9604	21.9273	27.2078	27.6295	32.0133	27.1529	37.085	29.4151	27.0496	21.349	23.6912	24.705	27.9376	27.093	21.3574	28.4574	26.8879	29.5265	28.8873	25.8098	25.6062
	43692.1	8	25.0474	20.8567	24.1626	21.7167	26.4522	26.9774	24.6054	22.1864	33.5303	24.8259	17.92	14.1447	25.3851	24.0478	18.8009	25.5535	25.2717	30.3484	29.6737	31.1074	34.7381	26.4555	16.4868	29.2844	22.2526	21.5916	27.6965	24.1682	28.1396	28.0671	33.5889	31.5798	38.4608	31.2273	29.3005	21.4176	25.99	26.0994	31.137	26.5519	21.6622	29.4807	28.5633	30.135	30.0599	26.1495	28.1744
	43692.2	10	27.3011	21.5735	24.769	25.5598	28.3907	28.1446	25.159	23.6808	35.2027	26.4497	14.7408	12.6118	27.0679	24.5902	21.0111	26.8202	27.9885	31.1493	29.6079	31.4986	39.3314	27.9391	16.7773	32.1372	23.4264	22.8748	31.7875	26.0563	29.13	31.2069	37.6589	32.5144	42.1551	35.2644	31.2765	24.7209	28.586	28.0107	33.7972	29.8418	25.0607	30.2691	31.8549	32.23	33.6315	27.4843	30.9409
	43692.3	12	28.9759	24.3152	28.1897	26.3966	30.7081	30.5661	26.0145	23.4454	37.9944	29.9096	14.9266	12.6972	29.018	27.5135	24.1994	28.5139	29.9084	35.0285	26.9936	34.4301	40.7858	29.232	16.5746	30.1343	26.0026	23.7422	33.6915	27.9808	31.6355	33.2688	40.5573	35.2371	45.5543	36.4417	33.1974	24.6624	30.4599	29.3936	36.3161	32.1413	26.8063	30.3363	31.4566	34.2928	37.9667	28.0671	31.4607
	43692.4	14	32.4721	26.1989	29.4043	28.7167	32.2432	32.7893	25.4149	25.324	41.312	30.9213	16.0883	12.8486	32.2143	28.937	24.7405	32.4234	31.1343	37.2727	29.9798	38.8739	44.2542	30.2888	15.9009	32.8023	27.3625	26.9345	36.4649	30.7925	32.6544	35.0235	43.2423	40.3156	51.2754	40.4827	35.5151	26.901	32.2783	30.8125	39.061	33.4772	26.6835	32.6232	33.7282	34.9815	39.2338	30.2265	34.8393
	43692.5	16	34.0767	4.03859	34.1313	30.9663	34.0515	36.0573	24.4826	27.9831	45.0554	33.4933	16.6458	13.1719	34.4735	31.0883	31.1823	35.0949	36.1196	40.8156	31.9336	39.6405	44.0464	31.7191	16.4382	36.2555	28.4454	29.4944	39.8323	35.0177	38.806	39.9076	47.7391	42.134	55.0793	43.5714	37.1662	30.3957	34.2059	30.1425	42.9259	34.4584	28.4478	34.1993	36.8805	35.4794	42.3031	32.1218	37.1016
	43692.5	18	35.1221	31.3232	35.8151	33.9846	38.0223	40.455	25.8608	24.051	46.9685	34.2571	17.9129	13.0258	35.0964	31.1821	33.2886	38.0084	40.4006	44.2777	35.4217	43.2017	49.3598	37.7987	16.9135	44.5573	30.6134	29.1484	41.968	37.3533	40.6761	43.8135	48.3338	47.0855	60.6007	47.1139	44.0178	33.1852	34.9706	32.0679	48.1475	34.9701	35.1042	35.7537	45.773	38.3742	48.5068	33.5273	44.3638
	43692.6	20	39.9302	31.9868	37.9562	36.607	41.2994	43.3342	25.5123	29.4895	46.9956	37.1094	18.0169	13.1004	36.4226	35.7788	34.8973	39.2545	42.7117	48.4699	33.0266	44.959	52.7788	38.6244	17.1309	45.1463	33.1905	33.672	47.2799	41.7934	43.6498	46.2443	55.5345	51.3636	61.5795	49.8962	45.947	36.9755	37.9458	32.2914	51.7004	35.9199	35.9703	36.0671	48.3745	38.4364	51.2658	33.8747	45.0229
	43692.7	22	43.4228	36.8477	41.0347	37.4832	45.4318	45.3042	27.1738	29.1314	55.4825	39.1401	16.7604	12.8549	41.1679	39.9194	37.3327	42.9715	46.7063	50.9315	35.0091	46.9111	53.6069	41.8999	16.5124	49.7833	34.4898	35.9023	49.7787	45.5153	48.1935	51.8066	57.9164	53.7102	65.9928	54.1701	48.5267	40.0613	40.071	32.9425	55.351	38.3349	39.6564	36.5133	51.7734	38.4984	57.3391	34.7158	48.0971
	43692.8	24	46.2989	39.1033	44.0307	42.3533	48.9646	48.5693	30.6643	30.3341	56.48	40.2526	17.313	13.2965	44.5397	41.063	40.4116	47.3768	48.946	53.8223	35.3522	52.9337	60.0198	42.9266	16.0505	50.9982	37.8671	37.1135	54.7031	47.9952	51.9257	54.3308	63.994	59.1917	70.3006	61.0898	49.762	42.7257	42.9985	32.9148	59.5579	38.1642	42.2695	35.6844	56.7846	40.0483	59.7162	34.2936	50.808
	43692.9	26	47.5267	43.4329	45.0184	46.6427	51.2804	55.1371	28.0645	31.208	61.2352	47.7295	16.7864	13.2166	48.2325	43.807	41.7956	50.0146	53.0288	60.155	39.0958	56.3973	62.9684	44.9366	16.0548	55.8428	40.7841	41.8071	58.0445	52.2975	53.3644	58.2646	64.5435	62.8456	74.5197	65.2989	55.4068	46.3301	43.2054	32.8857	64.9754	39.4922	43.8177	37.5121	61.0424	38.2023	65.8672	34.0058	51.7072
	43693	28	51.8651	44.7674	47.2542	51.1995	53.0144	59.7135	32.7527	31.1687	65.8945	53.2959	16.8342	12.9857	49.9408	48.8825	43.8302	54.4454	56.0252	64.6014	40.0265	63.9604	65.686	52.5614	15.9532	55.9822	44.0052	44.9012	60.9679	57.69	59.673	61.9756	72.9436	67.8264	78.5386	65.1232	61.691	49.3601	49.4126	33.6884	69.6502	39.4688	44.5847	38.1543	66.0525	38.7184	69.0866	34.1037	59.2422
	43693	30	55.9315	48.7731	52.4652	52.733	62.9527	63.8939	31.6282	33.4654	68.7794	57.261	17.3224	13.1534	54.1508	52.06	49.8114	58.5802	62.4217	69.4178	42.4434	65.1308	72.4747	56.795	16.3251	65.5647	48.5077	45.9511	66.6733	61.2636	64.4594	64.0031	74.2145	73.2373	81.5414	71.7675	64.6875	54.3306	53.6814	33.1896	74.6955	39.3349	53.0833	37.9092	66.6848	38.7337	70.541	34.6583	62.8759
	43693.1	32	60.6109	54.9964	53.6423	58.224	67.0407	67.0762	33.9283	35.2113	72.5969	59.1813	17.4751	13.3306	58.5554	57.2868	54.1696	62.6681	68.222	71.5822	42.6564	70.3466	76.8863	57.0815	16.7964	68.828	50.0399	49.4377	69.5751	67.6457	64.9427	70.5241	81.2784	79.4169	86.0108	77.8039	71.2807	58.8452	55.1686	34.3802	78.6236	39.4267	56.3289	37.3719	75.7254	39.9262	78.866	35.2616	69.3487
	43693.2	34	61.5393	59.7017	57.7476	59.8962	69.8722	73.7648	34.5002	37.4438	77.5606	63.7543	17.0709	14.0562	63.5722	57.6682	53.8276	65.7693	70.157	76.7131	44.1002	77.4329	81.8737	62.0964	16.7978	71.5816	54.231	53.0643	72.0251	68.8855	68.0111	75.0934	82.913	85.6747	88.8774	79.5533	75.3102	67.1321	60.4902	33.7827	80.9653	38.8261	61.1927	36.8392	78.5065	39.6419	82.7823	35.2286	75.287
	43693.3	36	66.3702	62.0772	62.3352	63.2789	72.5289	76.7917	34.8643	39.4089	84.6922	68.1662	18.2815	14.5759	65.1614	63.8582	57.12	70.1348	74.7009	77.0515	42.0879	77.8194	82.6112	66.4963	17.368	75.3847	56.0156	58.4059	78.7011	75.6575	73.3943	77.6777	85.7487	86.3616	93.3366	84.1397	81.1195	72.4576	64.1413	34.4692	84.0474	38.6523	63.7148	35.95	83.9803	39.4701	85.1246	34.9204	78.2985
	43693.4	38	72.4755	64.7571	63.4181	69.8389	78.3136	80.2795	38.6681	41.954	86.8594	77.0555	19.2576	15.5473	74.2432	70.7937	63.0296	75.5075	80.259	84.6531	46.4243	82.5725	87.2297	71.3875	18.4607	78.1984	61.6098	62.3633	79.0648	80.0536	77.6757	80.3737	90.4137	90.4703	93.8965	85.7946	84.2551	71.2144	69.5462	34.8754	86.5205	39.5827	65.5159	35.9485	87.72	39.6236	88.4115	34.6883	81.6174
	43693.5	40	73.8381	76.0305	71.6738	69.6719	80.9662	85.0324	38.4644	41.0292	89.1116	77.9643	20.9885	16.0613	78.113	76.4703	70.3722	82.0917	85.1764	85.9191	45.8686	87.5193	89.9141	79.6326	19.0788	84.1787	67.7689	69.3909	84.8662	82.5151	82.4968	85.6451	95.0455	94.3779	96.5651	89.858	84.6926	80.2234	72.3451	34.6531	88.6068	39.0434	74.3508	36.6699	91.2258	39.3818	90.9251	34.6982	85.8569
	43693.5	42	76.2057	77.757	74.5058	75.9852	86.5104	89.5252	40.3324	42.5812	93.2321	83.1984	21.7001	17.7325	82.854	82.1465	76.444	86.1478	89.3293	90.4019	49.9466	90.0417	93.142	85.8133	21.0083	84.9816	71.0564	73.2834	87.4758	85.669	86.4974	89.8217	95.7407	95.5605	97.7746	93.1848	88.1247	83.7774	75.8991	33.9169	91.2515	39.3106	78.7303	38.535	93.8383	39.1639	93.7934	35.3766	86.978
	43693.6	44	78.8085	82.4551	80.1869	80.722	88.8691	90.2889	40.496	46.0318	94.9753	86.9452	22.8994	19.369	84.8234	83.0019	75.4208	87.1242	92.8489	93.086	51.9783	94.2084	94.7545	84.8071	23.139	89.3799	73.6659	75.3593	89.0422	88.4642	89.5726	91.66	97.6284	97.3175	98.3636	94.9727	91.2327	87.7658	82.0867	34.2357	93.4274	40.0252	82.5574	37.8168	95.8411	40.5426	94.7599	35.5279	91.0282
	43693.7	46	83.2568	85.0904	78.5591	79.5239	90.8346	94.3771	42.1554	41.4788	95.6836	88.32	25.5406	20.5322	86.0412	86.4818	81.1473	89.9966	94.2338	93.1853	51.8714	95.1512	96.5239	91.1168	24.4367	92.4441	71.7407	77.615	90.575	90.727	89.8051	93.2752	97.9271	98.4574	98.7314	95.6208	93.833	90.333	84.6411	34.2532	94.4559	39.1646	84.9393	38.5077	96.3969	40.4832	96.4895	35.5085	92.5539
	43693.8	48	85.8643	88.0837	83.6288	86.7195	93.7894	94.4681	46.3348	44.9952	97.0217	90.288	26.4368	21.8452	89.64	91.5719	82.0063	91.7018	94.8986	95.5785	54.9045	96.4133	97.5447	92.9068	26.5803	95.5201	79.3226	82.7751	94.1407	93.1483	91.698	94.667	98.8545	98.9135	99.0704	96.4311	94.3443	92.3761	86.6869	34.6048	95.3867	39.4302	88.0626	37.4068	97.4016	41.0334	97.0559	36.0141	94.6165
	43693.9	50	87.8983	90.9527	83.3817	86.3498	94.9023	95.536	45.8638	44.934	97.1264	92.2286	29.086	22.6587	92.9982	92.2616	87.1125	93.4467	96.8416	96.1037	55.1378	97.4292	97.2759	94.8566	27.465	97.2862	80.0159	85.5379	94.4994	93.5795	94.2391	95.9635	99.2212	99.2128	99.4896	97.1103	95.1186	93.0078	90.3516	34.4123	96.2909	39.6757	90.0697	38.4677	97.6039	41.8909	98.3554	36.8538	95.1068
	43694	52	90.1454	90.4024	86.196	87.5351	96.7972	97.3392	47.2806	49.5831	98.2582	93.8895	30.1784	24.3797	93.9306	93.2975	85.6769	94.5713	96.9305	97.872	58.1478	98.1237	98.3328	96.397	28.1365	97.9107	83.5425	87.002	95.005	94.9624	95.6915	96.519	99.436	99.1608	99.641	98.1431	95.771	93.0971	90.6046	34.0537	97.2653	40.4237	90.9983	38.692	98.7311	41.4966	98.5724	37.7432	95.8094
	43694	54	93.3082	93.103	88.124	87.4433	97.454	97.9622	46.4005	51.3537	98.6501	96.804	30.4699	25.6097	95.6261	94.2286	88.9169	96.5195	98.0481	98.5675	58.9944	98.1199	98.8062	95.859	28.5576	98.3505	86.5589	90.2802	96.3227	95.7616	96.4643	97.3776	99.3158	99.3032	99.6275	98.4636	96.1175	94.0511	91.1965	34.1996	97.7653	41.7349	93.0939	39.6872	99.2627	42.2629	98.9665	38.6363	96.2716
	43694.1	56	93.8336	94.4176	90.2362	92.4041	97.5802	98.6724	48.03	52.0962	98.9159	97.484	32.075	26.1385	96.7156	96.0606	90.5661	97.4305	98.8623	98.9896	60.8205	98.7915	99.1145	97.1384	29.3456	98.8944	87.9842	91.7112	97.2064	96.7261	97.5198	98.3489	99.5015	99.3986	99.8292	98.9553	97.4028	95.2223	94.2363	34.9093	98.0887	41.5282	95.9703	39.4758	99.3478	42.4737	99.1182	37.5287	97.3222
	43694.2	58	94.727	96.8914	90.7897	93.0933	98.8763	99.2455	51.443	49.5296	99.2946	97.5495	34.1086	25.871	97.7655	96.5448	91.9143	97.9032	99.0095	98.9849	63.2543	99.2065	99.1225	97.384	30.6349	99.1512	88.2045	93.3019	98.0327	97.0557	98.3281	98.7735	99.7152	99.6932	99.835	99.4765	97.4435	96.376	95.4419	35.3482	98.6963	42.0977	96.9643	39.8248	99.2548	42.3427	99.2528	38.7405	97.438
	43694.3	60	96.2448	96.7504	91.8605	93.9184	99.0195	99.4881	52.5675	55.0552	99.3109	98.3688	33.8169	26.836	97.7661	97.7277	90.8819	98.3682	99.4818	99.4472	65.0452	99.3675	99.3483	98.1441	30.3265	99.5075	89.4657	94.5482	98.6094	97.7121	98.6308	99.1896	99.7751	99.7331	99.8826	99.6537	97.7563	96.6193	96.6237	35.9601	99.2969	43.2589	97.7699	40.1736	99.545	43.3534	99.384	39.4861	98.1163
	43694.4	62	96.026	97.7992	94.2393	94.696	99.2307	99.5797	52.4752	54.9338	99.4065	99.011	34.282	26.3445	98.2825	98.3021	94.9504	98.9208	99.3915	99.4186	64.0947	99.6171	99.4686	98.0946	31.213	99.5575	91.5937	95.176	98.5226	98.8383	98.62	99.3135	99.7987	99.8233	99.9084	99.8204	98.0798	97.4391	96.6507	36.2253	99.3866	43.3205	97.9562	39.9372	99.5659	43.9583	99.5857	39.4445	98.3943
	43694.5	64	97.2101	98.1269	93.6882	94.4479	99.286	99.5552	54.7357	55.9154	99.4263	98.9865	33.7363	26.8518	98.6582	98.9235	95.0672	99.058	99.5439	99.6516	67.3834	99.659	99.6051	98.0148	30.7564	99.5151	93.4967	95.7592	98.9175	98.9905	98.903	99.3975	99.8395	99.8594	99.9146	99.8405	97.9577	97.4017	97.4882	35.7176	99.5474	43.5267	97.9609	41.2936	99.6417	44.663	99.5595	40.1287	98.7101
	43694.5	66	97.6417	98.3369	95.4104	94.3711	99.5377	99.7127	58.8255	59.0941	99.7212	99.1139	32.9637	26.199	99.0826	98.7732	93.9276	99.3439	99.8054	99.7946	67.6261	99.7366	99.7212	98.3717	29.8645	99.6477	94.4995	96.9322	98.8624	99.5117	99.1928	99.6216	99.7765	99.907	99.9391	99.9232	98.2647	97.8487	97.749	36.3577	99.7671	44.4175	98.6838	41.5821	99.766	45.7641	99.6445	40.0193	98.7406
	43694.6	68	98.136	97.8565	95.0144	95.5658	99.5237	99.8062	58.0348	57.1097	99.6908	98.6233	33.5446	26.8654	99.164	99.0253	95.794	99.6277	99.8377	99.6708	70.4342	99.8675	99.7352	98.8022	32.5573	99.7543	94.6761	98.29	99.2798	99.5334	99.4369	99.6896	99.8636	99.9077	99.9324	99.946	98.5468	97.9674	98.2847	36.5954	99.795	45.4763	98.8939	42.4884	99.8359	45.8821	99.6876	40.7168	98.8936
	43694.7	70	98.8978	98.23	95.6876	96.3183	99.6518	99.7994	60.1577	63.8482	99.6979	99.2642	34.9682	25.7285	99.4623	99.3219	96.435	99.5197	99.8622	99.8264	74.4235	99.8949	99.8554	98.6354	31.009	99.7742	96.5957	98.6522	99.6661	99.6525	99.6989	99.7687	99.9031	99.908	99.9641	99.952	98.4507	98.3902	98.4521	38.5078	99.8798	47.2821	98.9082	43.1218	99.9146	45.0728	99.7175	41.1111	99.0714
	43694.8	72	98.7422	98.377	95.8183	96.7965	99.77	99.8635	62.0957	62.28	99.8452	99.2644	34.4638	25.6646	99.6336	99.1668	96.778	99.4843	99.9256	99.9134	75.7442	99.8879	99.8322	98.8827	31.0592	99.7136	96.8731	98.5864	99.6805	99.756	99.7357	99.7854	99.9205	99.944	99.9788	99.9566	98.4287	98.5769	98.5342	37.8765	99.847	47.0566	98.8902	43.7875	99.9458	46.6664	99.8512	41.2119	98.9987
	43694.9	74	98.6921	98.6235	97.0984	96.462	99.8308	99.7977	63.5069	60.1767	99.7805	99.3034	33.8871	25.2889	99.5535	99.4951	97.5211	99.7688	99.932	99.8931	75.6844	99.9161	99.8101	99.2502	31.2299	99.6562	97.0314	99.0873	99.8229	99.8134	99.8116	99.8554	99.9208	99.96	99.9844	99.9383	98.6779	98.6835	98.8257	38.7157	99.8572	47.522	99.0907	43.8571	99.9585	47.3813	99.8918	42.6642	99.2386
	43695	76	98.976	98.7043	97.1472	97.528	99.8952	99.8527	63.3464	68.0512	99.7759	99.4402	34.0384	25.3533	99.6077	99.5891	97.2868	99.7907	99.9658	99.9204	77.2648	99.9355	99.8927	99.2708	28.4525	99.6697	96.9977	99.2144	99.7167	99.8742	99.7509	99.8776	99.8991	99.95	99.9889	99.9164	98.8372	98.6397	99.1321	39.1289	99.8848	48.2788	99.0251	45.4525	99.9674	47.7461	99.8461	43.8118	99.3055
	43695	78	99.2183	98.9173	96.1653	97.5162	99.934	99.9206	68.0318	67.5505	99.8913	99.3321	32.1249	24.5348	99.5896	99.7293	97.6696	99.8232	99.976	99.9413	76.7509	99.9064	99.8584	99.4085	29.5632	99.7259	98.0092	99.4143	99.8593	99.8782	99.8404	99.9086	99.8702	99.956	99.9928	99.9419	99.208	98.8437	98.9789	39.2939	99.9314	50.1169	99.2054	45.3967	99.9826	48.6881	99.8761	43.9008	99.4985
	43695.1	80	99.4322	98.8931	96.9437	97.6704	99.8778	99.875	69.6847	68.4479	99.8595	99.5565	32.4573	25.5861	99.7016	99.7378	97.8307	99.926	99.9672	99.9312	78.6577	99.9337	99.8106	99.4676	28.9125	99.8334	98.3327	99.4668	99.8552	99.9273	99.802	99.915	99.9174	99.9732	99.9831	99.9295	99.1646	98.9879	99.1825	40.1447	99.9294	49.0379	99.2681	46.0763	99.9912	49.0022	99.9146	44.9034	99.6342
	43695.2	82	99.5733	99.1881	97.5701	97.7027	99.9406	99.8859	70.6569	70.0845	99.918	99.5329	31.4171	25.1632	99.7169	99.685	97.8999	99.9243	99.9684	99.9347	78.5667	99.8975	99.9107	99.58	28.4393	99.7571	98.4934	99.6492	99.8263	99.9429	99.8489	99.9028	99.9102	99.9911	99.9835	99.9637	99.2448	98.8668	99.1569	40.5696	99.9633	50.2391	99.2764	46.5409	99.9858	49.3049	99.9411	44.4393	99.5971
	43695.3	84	99.2325	98.9387	96.2344	97.699	99.8152	99.8474	70.4962	70.6205	99.8937	99.487	32.7885	24.087	99.5181	99.695	97.9712	99.8621	99.9863	99.943	81.643	99.9342	99.8806	99.6506	28.9943	99.716	98.3227	99.8002	99.8318	99.9162	99.8838	99.9194	99.9071	99.9924	99.9836	99.9646	99.3999	98.7985	99.1443	40.0832	99.9539	50.5625	99.5301	46.3827	99.9943	50.5785	99.9605	46.1165	99.6009
	43695.4	86	99.2856	98.9837	97.9268	97.0824	99.9299	99.9282	74.1193	73.5483	99.9391	99.5379	30.8008	24.0412	99.8463	99.7845	97.7942	99.9341	99.9879	99.9802	81.1332	99.9169	99.9017	99.8114	29.0841	99.7141	98.5467	99.8197	99.9188	99.9397	99.9407	99.9176	99.8939	99.9849	99.9779	99.974	99.4785	98.9301	99.2646	41.338	99.9756	50.1742	99.5062	47.0931	99.9699	51.0849	99.9716	46.3292	99.583
	43695.5	88	99.0077	98.9868	97.2319	97.6313	99.9383	99.8542	72.1176	72.7736	99.9107	99.44	31.4356	23.7799	99.7507	99.7643	98.4463	99.8789	99.9674	99.9452	84.4687	99.9272	99.8981	99.8079	29.3627	99.7498	98.8106	99.715	99.9412	99.9506	99.9126	99.9454	99.8099	99.9889	99.9911	99.9644	99.4701	98.894	99.3947	43.0187	99.9773	51.5984	99.5477	48.7499	99.9767	50.9366	99.9821	46.3169	99.7031
	43695.5	90	99.5881	98.9553	97.3224	97.5666	99.963	99.9233	71.5504	74.7856	99.9469	99.6192	30.4799	23.5832	99.7823	99.8604	97.99	99.9272	99.9924	99.9731	83.5833	99.9301	99.9054	99.867	28.4865	99.773	99.2497	99.7784	99.97	99.9397	99.8858	99.9671	99.8731	99.9734	99.9839	99.9889	99.5299	98.8969	99.4412	43.0081	99.9834	53.1495	99.5846	48.1771	99.9469	51.4513	99.9742	46.4981	99.6511
	43695.6	92	99.4068	99.1526	97.4674	97.819	99.9335	99.9421	74.9933	76.918	99.9455	99.6559	30.398	24.14	99.8287	99.8465	98.2747	99.9646	99.9944	99.9666	83.0843	99.9536	99.8993	99.9046	28.2076	99.7801	99.1645	99.8651	99.9646	99.9689	99.9742	99.9252	99.922	99.9932	99.9921	99.9758	99.7064	98.8804	99.2805	42.9638	99.9891	52.4863	99.6385	49.6462	99.9645	52.3904	99.9467	47.6228	99.5422
	43695.7	94	99.4126	99.2199	96.3726	97.6145	99.9641	99.9469	76.3898	76.9436	99.9454	99.5973	28.8065	23.0716	99.7657	99.8245	97.9015	99.9425	99.9964	99.9596	86.2303	99.9493	99.8551	99.8465	28.9957	99.7854	99.3329	99.8638	99.965	99.9637	99.9704	99.9634	99.8812	99.9908	99.9933	99.9876	99.6409	98.8463	99.444	44.0447	99.9975	53.9351	99.5883	50.9262	99.9668	54.2466	99.956	48.3659	99.6421
	43695.8	96	99.5174	99.3264	97.1606	98.1536	99.8793	99.9231	76.3344	77.449	99.9448	99.6448	29.1909	22.9851	99.718	99.8702	98.3058	99.9389	99.9833	99.9712	87.2758	99.9185	99.7852	99.9236	28.8968	99.804	99.4128	99.9169	99.9758	99.9714	99.9646	99.9328	99.8919	99.9839	99.9927	99.9633	99.6714	98.9911	99.3658	43.9733	99.9964	53.9221	99.5806	51.8841	99.9702	54.6809	99.9814	49.1958	99.7761
	43695.9	98	99.4932	99.3056	97.4085	97.669	99.8625	99.8481	77.4814	79.0721	99.9651	99.7225	27.3698	23.2926	99.7154	99.9297	98.275	99.9232	99.9947	99.9412	85.966	99.9738	99.8791	99.8834	29.2791	99.7988	99.5021	99.8688	99.9429	99.9402	99.9399	99.9424	99.9477	99.9907	99.9971	99.9671	99.6804	98.9919	99.4772	44.582	100	54.8892	99.6603	52.8251	99.9624	54.9268	99.9687	50.1046	99.7167
	43696	100	99.4813	99.4004	97.1493	98.0508	99.909	99.8521	77.1015	79.1343	99.955	99.7617	27.5309	23.4518	99.7755	99.8649	97.8726	99.9561	99.9887	99.9628	88.1182	99.985	99.8416	99.8968	28.6282	99.8616	99.5383	99.9049	99.9875	99.9439	99.9342	99.9699	99.9402	99.987	99.9935	99.9725	99.6119	99.0983	99.6176	44.825	100	56.1267	99.703	52.9384	99.949	54.78	99.9783	49.8358	99.8139
	43696	102	99.5656	99.3315	97.2342	97.1047	99.9471	99.8867	80.1558	78.2875	99.9509	99.7413	27.928	23.7827	99.5016	99.8166	97.9342	99.9426	99.9902	99.9706	89.0592	99.9743	99.8848	99.9426	27.5126	99.8412	99.5951	99.8449	99.9483	99.9527	99.9619	99.9784	99.9448	99.9763	99.9965	99.9954	99.731	99.2004	99.6074	44.5563	99.9891	55.8509	99.7463	54.5994	99.958	54.2193	99.96	51.2501	99.7615
	43696.1	104	99.376	99.4298	97.1034	96.6394	99.9514	99.8992	79.1342	77.9004	99.9469	99.7395	27.6764	23.0982	99.5653	99.7981	98.2724	99.9632	99.9825	99.9778	89.1993	99.981	99.8889	99.9125	26.1599	99.8476	99.6766	99.8662	99.9729	99.9421	99.9829	99.9716	99.9498	99.9825	99.992	99.9874	99.7905	99.2099	99.6563	45.6951	99.9854	57.0163	99.7625	54.6512	99.9474	55.4629	99.9766	51.4247	99.7501
	43696.2	106	99.4171	99.4012	97.0141	97.294	99.9322	99.9397	81.4706	82.8242	99.9666	99.8022	26.6404	23.2706	99.6899	99.8616	98.0459	99.9592	99.9914	99.9634	89.5808	99.9758	99.8948	99.9282	26.5392	99.8597	99.7418	99.8752	99.9839	99.9495	99.9733	99.9844	99.9613	99.9829	99.9822	99.9804	99.7944	99.2789	99.7095	47.2439	99.9874	56.609	99.7572	56.3033	99.9438	56.7633	99.9879	54.2499	99.8105
	43696.3	108	99.5769	99.429	96.8071	96.7689	99.9292	99.8414	81.6429	80.504	99.9283	99.7369	29.1766	22.8472	99.6579	99.842	97.7899	99.9663	99.9871	99.9646	90.4352	99.9831	99.9261	99.9134	25.8157	99.8821	99.6762	99.8304	99.9424	99.9404	99.9513	99.962	99.9645	99.9865	99.9904	99.9603	99.7785	99.3129	99.6518	47.3274	99.9971	58.0126	99.792	57.1255	99.9498	56.9017	99.9813	54.4185	99.8352
	43696.4	110	99.4884	99.499	97.0968	97.1253	99.9476	99.8827	82.5725	83.9985	99.9635	99.8423	26.919	22.0657	99.8163	99.8734	97.9221	99.9752	99.9897	99.9676	91.024	99.9857	99.8956	99.9106	27.2008	99.9043	99.7517	99.8762	99.9841	99.9302	99.9562	99.9592	99.984	99.9857	99.9844	99.9864	99.7562	99.3996	99.6475	48.0531	99.9976	59.0283	99.8222	58.428	99.9381	58.7407	99.9808	54.7161	99.8222
	43696.5	112	99.6203	99.398	97.6584	97.2239	99.9635	99.8736	82.9003	83.7079	99.9385	99.8299	26.6415	22.8876	99.6521	99.8629	98.3888	99.9826	99.9891	99.9529	89.8429	99.9917	99.8853	99.8908	26.2828	99.9021	99.7253	99.9059	99.9572	99.9472	99.9636	99.971	99.9685	99.9876	99.9854	99.9854	99.8204	99.3797	99.7055	50.0574	99.9917	60.5986	99.8512	59.2044	99.9047	59.4017	99.9777	55.596	99.8272
	43696.5	114	99.7368	99.4347	97.2435	96.1411	99.9106	99.9004	85.714	81.5831	99.9383	99.8351	27.0386	23.3176	99.7783	99.889	97.2163	99.9714	99.9806	99.9553	91.4173	99.9872	99.8691	99.9317	25.2982	99.9365	99.7813	99.9208	99.9765	99.9635	99.9282	99.9781	99.9738	99.9886	99.9916	99.9833	99.8095	99.4117	99.693	49.7987	99.9911	60.6909	99.8453	59.4109	99.8899	61.4228	99.9889	56.6973	99.8586
	43696.6	116	99.474	99.5418	96.4617	96.9779	99.9047	99.9092	82.9692	81.5705	99.9174	99.7986	25.7367	23.1062	99.6008	99.8844	98.3035	99.9663	99.9901	99.9623	91.486	99.9788	99.8805	99.9114	25.4238	99.9117	99.5442	99.9361	99.9548	99.981	99.9273	99.9656	99.9421	99.9923	99.9888	99.9747	99.8552	99.3585	99.6924	49.7836	99.9896	61.6241	99.8917	59.7291	99.9318	62.6173	99.9852	54.7102	99.8794
[truncated: 193 more columns]

## Sheet: Platemap_2
		1	2	3	4	5	6	7	8	9	10	11	12	13	14	15	16	17	18	19	20	21	22	23	24
	A																									A
	B																									B
	C			BI00801818	BI00801818	WZ4003	WZ4003	BI00113608	BI00113608	GSK190937	GSK190937	GW429374	GW429374	GW440146	GW440146	GSK2328680	GSK2328680	NVS-PAK1-1	NVS-PAK1-1	HTH-01-015	HTH-01-015	VE-821	VE-821			C
	D			BI00801818	DMSO	WZ4003	Torin	BI00113608	Tor+Baf	GSK190937	DMSO	GW429374	Torin	GW440146	Tor+Baf	GSK2328680	DMSO	NVS-PAK1-1	Torin	HTH-01-015	Tor+Baf	VE-821	DMSO			D
	E			SB-219980	SB-219980	GW621970X	GW621970X	GSK2376236	GSK2376236	GSK949675	GSK949675	BI00645435	BI00645435	GSK299115A	GSK299115A	GSK2850163	GSK2850163	GW305074X (also GW5074)	GW305074X (also GW5074)	TPKI-91	TPKI-91	BI00007366	BI00007366			E
	F			SB-219980	DMSO	GW621970X	Torin	GSK2376236	Tor+Baf	GSK949675	DMSO	BI00645435	Torin	GSK299115A	Tor+Baf	GSK2850163	DMSO	GW305074X (also GW5074)	Torin	TPKI-91	Tor+Baf	BI00007366	DMSO			F
	G			GSK1379762	GSK1379762	GSK1398477	GSK1398477	JH-II-127	JH-II-127	UNC-AA-1-0013 (SGC-AAK1-1)	UNC-AA-1-0013 (SGC-AAK1-1)	PFE-PKIS 41	PFE-PKIS 41	Vertex 11e	Vertex 11e	GW560459	GW560459	BI00601000	BI00601000	GW440135	GW440135	GW442130X	GW442130X			G
	H			GSK1379762	DMSO	GSK1398477	Torin	JH-II-127	Tor+Baf	UNC-AA-1-0013 (SGC-AAK1-1)	DMSO	PFE-PKIS 41	Torin	Vertex 11e	Tor+Baf	GW560459	DMSO	BI00601000	Torin	GW440135	Tor+Baf	GW442130X	DMSO			H
	I			GSK1379761	GSK1379761	AH5015	AH5015	GSK1392956A	GSK1392956A	CCT241533	CCT241533	GSK2269557	GSK2269557	GSK2292767	GSK2292767	GW282449A	GW282449A	GSK579289A	GSK579289A	GSK2298859	GSK2298859	GSK2288359	GSK2288359			I
	J			GSK1379761	DMSO	AH5015	Torin	GSK1392956A	Tor+Baf	CCT241533	DMSO	GSK2269557	Torin	GSK2292767	Tor+Baf	GW282449A	DMSO	GSK579289A	Torin	GSK2298859	Tor+Baf	GSK2288359	DMSO			J
	K			PFE-PKIS 25	PFE-PKIS 25	PFE-PKIS 34	PFE-PKIS 34	GW811761X	GW811761X	XMD-17-51	XMD-17-51	BI00009348	BI00009348	CCT251545	CCT251545	TPKI-105	TPKI-105	SB-708998	SB-708998	SB-693162/GW549034	SB-693162/GW549034	SB-633825	SB-633825			K
	L			PFE-PKIS 25	DMSO	PFE-PKIS 34	Torin	GW811761X	Tor+Baf	XMD-17-51	DMSO	BI00009348	Torin	CCT251545	Tor+Baf	TPKI-105	DMSO	SB-708998	Torin	SB-693162/GW549034	Tor+Baf	SB-633825	DMSO			L
	M			GW784752X	GW784752X	GW780159X	GW780159X	GW580509X	GW580509X	GW525701	GW525701	SB-282975	SB-282975	SB-735464	SB-735464	TPKI-39	TPKI-39	TPKI-69	TPKI-69	THZ531	THZ531	TH257	TH257			M
	N			GW784752X	DMSO	GW780159X	Torin	GW580509X	Tor+Baf	GW525701	DMSO	SB-282975	Torin	SB-735464	Tor+Baf	TPKI-39	DMSO	TPKI-69	Torin	THZ531	Tor+Baf	TH257	DMSO			N
	O																									O
	P																									P
		1	2	3	4	5	6	7	8	9	10	11	12	13	14	15	16	17	18	19	20	21	22	23	24

## Sheet: Plate 2 Ratio Green_Red 1
	Vessel Name: 190730_RPE1_KCGS_Plate_2		C3	D3	E3	F3	G3	H3	I3	J3	K3	L3	M3	N3	C4	D4	E4	F4	G4	H4	I4	J4	K4	L4	M4	N4	C5	D5	E5	F5	G5	H5	I5	J5	K5	L5	M5	N5	C6	D6	E6	F6	G6	H6	I6	J6	K6	L6	M6
	Date Time	Elapsed	GSK1838705	GSK1838705	GW830263A	GW830263A	BI01125081	BI01125081	BI00614644	BI00614644	THZ1	THZ1	PFE-PKIS 3	PFE-PKIS 3	GSK1838705	DMSO	GW830263A	DMSO	BI01125081	DMSO	BI00614644	DMSO	THZ1	DMSO	PFE-PKIS 3	DMSO	GSK872	GSK872	TPKI-100	TPKI-100	GW280670X	GW280670X	GSK114	GSK114	GSK2219385	GSK2219385	BI00036838	BI00036838	GSK872	Torin	TPKI-100	Torin	GW280670X	Torin	GSK114	Torin	GSK2219385	Torin	BI00036838
	43676.8	0	17.4133	17.7278	17.8321	17.6567	18.3988	17.3414	17.9886	18.1566	17.9721	17.872	18.8618	18.2283	16.7505	17.4664	17.7906	17.6023	18.3737	17.6389	18.0379	17.0422	17.7998	17.7959	17.7807	18.0845	18.2814	17.8947	17.9281	18.25	17.8498	18.1546	17.9782	18.0301	18.2031	17.7549	17.7841	17.8786	17.7985	17.8438	17.6913	17.6772	18.416	18.2784	17.8315	18.3701	18.2785	17.7404	17.9406
	43676.9	2	17.2045	20.6433	17.939	17.4244	18.3848	17.7642	17.9974	18.0671	18.104	17.9969	18.8094	18.4527	16.9836	17.4641	17.7074	17.6614	18.3897	17.8614	18.2428	16.8996	17.7417	17.857	17.9647	17.9163	18.3352	17.8225	17.7931	18.6027	18.0266	18.3766	18.1143	18.0636	18.2426	17.9729	17.7698	18.0206	17.9761	16.2832	17.8496	16.3416	18.4568	16.931	17.9376	16.6586	18.278	16.2369	17.9867
	43677	4	17.5394	17.9467	17.9479	17.7927	18.6104	17.8593	18.1566	18.1818	18.0304	18.0637	18.779	18.5158	17.1916	17.8113	17.7465	17.7813	18.5966	18.1854	18.3348	16.9576	17.8651	18.0614	17.8748	18.1777	18.4244	18.1938	18.1957	18.6346	18.019	18.2959	18.3381	18.0733	18.3877	18.1275	17.949	17.8776	18.1353	14.3156	18.0594	14.5394	18.6879	15.3125	21.0481	17.32	18.6751	14.6112	21.2377
	43677.1	6	17.5862	18.0959	18.0625	17.9908	18.4924	18.2019	18.2601	18.2408	18.1884	18.2823	18.8296	18.4882	17.3988	17.8683	18.0904	17.9558	18.5247	18.2819	18.5382	17.1246	17.905	18.2825	18.2513	18.1932	18.3911	17.9556	18.4128	18.9108	18.3037	18.1271	18.4075	18.2533	18.4374	18.1367	18.2459	18.047	18.4836	12.1623	18.4441	12.5	18.6794	13.2378	18.4793	12.9761	18.7647	12.6354	18.4927
	43677.2	8	17.744	18.1788	18.0389	18.2001	18.6317	18.2498	18.3385	18.2704	18.4859	18.4319	19.141	18.5542	17.437	17.9285	18.4332	18.1784	18.9591	18.3553	18.8209	17.32	17.9631	18.4474	18.4125	18.1843	18.5756	18.1244	18.6663	19.1365	18.4091	18.3799	18.478	18.624	18.6289	18.3206	18.2816	18.481	18.3518	10.7865	18.9432	10.8946	18.6964	11.2973	18.447	11.2488	18.794	11.0132	18.7108
	43677.2	10	17.8611	18.4966	18.1308	18.3151	18.6643	18.5037	18.5795	18.2249	18.7301	18.8022	18.9606	18.5625	17.7208	18.3386	18.6268	18.4078	18.7927	18.6598	18.8952	17.3058	18.2168	18.1164	18.5809	18.2354	18.7335	18.3165	18.8155	19.3965	18.4843	18.764	18.7974	18.373	18.6566	18.4525	18.5412	18.8035	18.5722	9.67335	18.715	9.55214	18.9245	9.96354	18.5942	9.83709	18.8876	9.76402	18.8482
	43677.3	12	18.113	18.5421	18.3175	18.3029	19.1319	18.7913	18.4799	18.2752	18.6233	18.5626	19.1992	18.6256	17.9791	18.6009	18.8892	18.4511	18.8668	18.928	19.2821	17.1844	18.279	18.092	18.6414	18.5168	18.6218	18.4783	19.0518	19.4837	18.548	18.9053	18.8758	18.4579	18.9684	18.562	18.5256	18.783	18.9039	8.60599	19.1309	8.71452	18.775	9.02847	18.7591	8.89342	19.1656	8.77508	18.9642
	43677.4	14	18.2604	18.9994	18.5214	18.4854	18.8923	19.0078	18.6329	18.2059	18.6415	18.8705	19.0549	18.6	18.0094	18.5922	19.4104	18.4647	19.2815	19.1742	19.4531	17.3854	18.412	18.4093	18.8784	18.5494	18.8812	18.7646	19.3515	19.759	18.6307	18.6295	18.8602	18.6174	19.1093	18.7117	18.6777	19.0356	19.1436	8.00701	18.9572	7.94825	18.9048	8.19655	18.8984	8.13858	19.161	7.97299	19.2176
	43677.5	16	18.2923	19.49	18.6586	18.6047	19.1029	19.1708	18.559	18.134	18.8532	18.9193	19.1154	18.5763	17.9281	18.9056	19.6139	18.7119	19.3121	19.0585	19.732	17.4711	18.6603	18.0857	18.9265	18.5098	19.0445	18.9421	19.3863	19.77	18.5778	18.8041	19.0535	18.9504	19.3031	18.5378	18.7548	19.3565	19.275	7.39494	19.4132	7.4295	18.703	7.58438	19.0652	7.46301	19.7067	7.38072	19.5249
	43677.6	18	18.7551	19.6126	18.7661	18.821	19.0622	19.3732	18.9528	18.3423	18.7974	19.1249	19.0206	18.7727	18.0553	18.8732	19.8893	18.715	19.1941	19.3025	20.1417	17.8479	18.8009	18.0224	19.2138	18.6004	19.1629	19.399	19.6782	20.1837	18.7438	18.9228	19.3373	18.8948	19.6097	18.92	18.7193	19.6482	19.5044	6.96275	19.9174	6.88664	19.3088	7.01634	19.4032	6.90563	19.8209	6.90391	19.6355
	43677.7	20	19.0559	19.9437	19.3733	19.3691	19.3968	19.6521	18.9328	18.0964	19.0677	19.1542	19.3178	18.9454	18.3604	19.1481	20.837	19.4245	19.5571	19.6926	20.9055	18.0054	19.197	18.3504	19.2593	18.5803	19.6086	19.3964	20.3179	20.2967	18.6626	19.1056	19.7201	19.2795	19.9073	18.83	19.0981	19.3098	19.9703	6.67784	20.727	6.51404	19.586	6.64812	19.6644	6.57156	20.2374	6.57913	20.3931
	43677.7	22	19.1133	20.1917	19.7983	19.49	19.3333	20.2164	18.6776	18.1293	19.4122	19.3931	19.1955	19.1312	19.0524	19.4212	20.8075	19.5672	19.6906	20.0769	20.7494	18.1262	19.2112	18.3444	19.5868	18.6189	19.5458	19.7533	20.9056	20.5556	19.3071	19.4641	19.7704	19.2832	20.2635	18.8553	19.4952	19.97	20.5869	6.41703	20.8075	6.11926	20.0763	6.28327	19.9968	6.27065	20.2297	6.16995	20.4585
	43677.8	24	19.0786	20.697	20.1669	20.2257	19.6799	20.6203	18.9198	18.3713	19.9549	19.908	19.3534	19.1706	19.2996	19.4285	21.4006	19.7868	19.8263	20.2052	21.0269	18.4187	19.2653	18.0437	19.9406	18.9956	20.1912	19.9112	21.0218	21.6301	19.5933	19.7728	20.4129	19.5812	20.4369	19.5217	19.6214	20.4494	20.4363	6.27329	21.1294	6.00328	20.849	6.03517	20.3779	6.13951	20.7604	5.91935	20.6947
	43677.9	26	19.3479	21.5001	21.2307	20.8643	19.9549	21.1559	19.4832	18.2986	19.5901	19.7031	19.6215	19.0892	19.65	20.3252	22.1503	20.0314	20.1688	20.5035	21.4283	18.3917	19.4203	18.3348	19.8951	19.0638	20.3046	20.4933	21.5895	21.8423	20.2638	20.0587	20.5964	19.5422	21.127	19.8125	19.5913	20.7207	20.9493	6.13407	22.2907	5.78853	20.6751	5.90851	21.1313	5.93273	21.2039	5.73511	20.7236
	43678	28	19.8569	22.2566	22.0022	21.8232	20.5982	21.8255	19.1034	18.2666	20.0782	20.1343	19.5071	19.0333	19.5132	20.7979	22.5512	20.5492	20.3452	20.8538	21.3179	18.5646	20.2945	18.4589	20.3218	19.1731	20.9454	21.014	22.3008	22.4616	21.0959	20.2843	21.299	20.1634	21.1803	20.1788	20.0308	21.615	21.9198	5.97063	23.4295	5.6822	21.289	5.76177	21.4222	5.87174	21.9493	5.55625	21.4601
	43678.1	30	20.6066	21.8018	22.6316	21.6095	20.7753	22.2446	19.4448	18.5344	20.1996	20.4726	19.5633	19.3222	20.1083	21.2165	22.5295	20.6725	21.2118	20.9099	21.8861	18.7854	20.1055	18.1988	20.9297	19.4125	21.3323	21.2997	22.745	22.7242	21.2972	20.448	21.5262	20.2167	21.475	20.5176	20.5927	21.5062	22.254	5.85132	22.8798	5.64592	21.8989	5.6794	21.8219	5.76023	22.4582	5.54891	21.1424
	43678.2	32	20.5745	22.7271	23.1074	22.6552	21.2643	22.2211	19.3986	18.5314	21.0522	20.3251	19.8081	19.4132	20.5437	21.3632	23.5081	21.1178	21.29	21.5054	22.5323	19.2976	20.1241	18.5763	21.0932	19.7065	21.6111	21.6391	22.837	23.2655	21.0144	20.9275	21.7201	20.7461	22.0253	20.7149	20.8231	21.9206	22.2109	5.8138	22.9413	5.67817	22.217	5.66384	21.5704	5.74935	22.6942	5.55547	21.4374
	43678.2	34	20.9007	22.6645	23.3871	23.1913	21.2291	22.9963	20.0119	18.7226	21.6656	20.8418	19.9951	19.6253	21.3146	21.4608	24.2335	20.9383	21.5188	21.8803	21.3924	19.7239	20.2502	18.8299	21.653	20.2736	22.2045	21.8128	23.3826	23.4067	21.7072	21.4224	22.512	20.553	22.0803	21.5803	21.7102	21.8468	22.7041	5.85926	23.0061	5.72589	22.8267	5.67495	21.67	5.7261	23.5829	5.5283	21.7095
	43678.3	36	21.0567	22.5392	23.6321	23.2783	21.8174	22.5238	20.2782	19.0161	21.4027	21.0348	20.7386	20.0577	21.7608	21.4341	24.0522	21.5744	22.37	21.6764	22.6168	19.7283	20.661	19.6369	22.1399	20.4794	22.3391	22.7049	22.69	23.9557	21.6108	21.967	22.8307	20.9601	22.4129	21.8986	22.2351	22.3654	23.2239	5.87081	23.5466	5.69178	22.5535	5.76245	22.7711	5.82634	23.1326	5.55701	22.1596
	43678.4	38	21.1719	24.103	23.8956	23.7811	22.0061	23.3135	20.5405	18.7405	21.6268	22.1747	21.3662	19.9406	21.9901	21.5382	23.9605	21.3242	22.553	22.5043	22.4037	19.7031	21.114	20.0827	22.5362	20.7986	22.5081	22.7026	23.6818	23.3996	22.2782	21.8096	23.1033	21.5607	23.1301	22.3742	22.231	21.9936	23.0387	5.85514	23.1965	5.78879	22.9479	5.75734	23.1568	5.85733	23.0368	5.63295	23.1616
	43678.5	40	21.8085	23.8709	24.5728	24.3418	22.1496	22.4606	20.5489	19.6019	21.7485	20.8733	22.0921	20.4791	22.4926	21.2201	25.1257	22.1073	22.7288	21.6015	21.9167	19.5731	21.7111	20.3976	22.7761	21.0776	23.0072	22.5242	23.9715	23.6212	22.6104	21.9993	22.6993	21.8072	23.2409	21.8314	22.4612	22.4482	22.7316	5.90454	23.8567	5.93033	22.5824	5.77894	23.0791	5.88823	23.1264	5.62516	23.3584
	43678.6	42	21.6292	23.7135	24.4151	23.9751	22.4359	22.6593	20.9949	20.0752	23.0493	21.8333	21.8341	21.2928	22.5877	22.3319	24.3723	21.5444	22.8375	21.7941	22.2631	20.0157	22.4712	20.7505	22.3002	21.098	22.9024	22.3839	23.8918	23.3209	23.0067	21.977	22.9615	22.0436	23.5375	22.4889	22.7871	22.359	23.2562	5.99262	23.6678	5.98429	23.1966	5.85421	23.3753	6.03104	23.9611	5.69524	22.6026
	43678.7	44	21.5467	23.6411	24.1133	23.2751	22.3768	22.6222	20.5588	19.9288	22.5037	22.3134	22.5574	21.4427	22.039	21.3627	23.7241	22.0636	23.5913	21.747	21.8011	20.5425	21.8895	20.9268	22.7455	21.4668	23.034	22.9835	24.3829	23.6745	23.0936	21.959	23.0698	21.8818	23.2916	22.8115	22.1838	21.74	22.9239	6.07893	23.654	6.04847	23.4719	5.94392	23.0435	6.04906	23.9566	5.83864	22.6499
	43678.7	46	22.2511	23.386	23.6307	23.5295	22.505	22.9203	20.6675	20.1131	23.0814	21.9227	23.1468	21.4375	22.621	21.8132	23.9741	21.9103	23.7208	21.6744	22.4383	20.6028	22.1486	21.1995	23.1266	21.3725	23.3634	22.7757	24.1969	23.4816	21.9402	21.8015	22.7359	21.9731	23.3204	22.2706	21.9339	23.1397	22.4843	6.12962	23.7344	6.22409	23.0892	6.07641	23.0967	6.20376	23.9815	5.96993	22.7884
	43678.8	48	20.8461	23.4245	23.9225	23.2369	22.6562	22.5211	21.0684	20.0085	23.0069	22.6253	22.7803	21.9301	22.319	21.9249	23.4912	21.7115	23.232	21.5748	22.6022	20.5169	22.3557	21.4123	23.1399	21.016	23.3629	22.7799	24.419	23.4313	22.4031	22.4504	22.9375	22.8814	23.053	22.7781	22.0736	22.5857	22.0352	6.18946	23.6031	6.23464	23.1261	6.09547	23.1381	6.23389	23.6527	5.98156	22.409
	43678.9	50	21.5361	23.6978	23.607	22.8473	22.7159	23.2513	21.1743	20.5407	22.3804	23.193	23.4707	21.8523	22.7493	21.5221	23.3662	21.8825	22.6319	21.6647	21.8466	20.7985	22.9832	21.5712	23.4968	21.0775	23.1957	22.9559	24.1333	24.1076	23.1632	22.5814	23.268	22.6774	22.8123	23.0366	22.9987	23.1471	22.2589	6.26851	24.2024	6.27387	23.0513	6.11926	23.2088	6.34421	23.4938	6.01953	22.7564
	43679	52	20.9372	23.1186	23.5062	22.7246	22.4721	22.7269	20.4283	20.2989	23.5475	22.9157	22.8821	22.0917	23.3598	21.642	23.7857	21.7387	23.2366	21.5168	22.6101	20.3425	22.8315	21.9919	23.2703	20.9521	22.5854	22.8476	24.1703	23.3485	22.9017	22.0719	23.2682	22.885	22.8613	22.8516	23.0419	22.6525	22.988	6.34281	23.6261	6.3303	22.5606	6.14441	22.7295	6.42005	23.5588	6.13153	22.6368
	43679.1	54	22.7659	23.4211	24.0598	22.3091	22.6728	22.6342	20.4991	20.2574	22.3342	22.4835	22.6428	22.3667	22.5372	20.9968	23.1381	21.7002	23.5452	21.6139	22.4753	20.6775	23.1332	21.8476	23.2822	21.6501	22.7221	23.2246	23.3494	23.3973	22.985	22.6639	22.8371	22.701	23.2639	23.2863	22.7259	22.8414	22.7397	6.44345	22.9214	6.43355	22.6574	6.22117	23.1995	6.50223	23.203	6.20787	22.3428
	43679.2	56	21.4491	22.6284	23.1839	22.2488	22.3613	22.1465	20.8723	20.7559	22.4478	22.3638	23.2078	22.1738	21.9272	21.1682	22.6444	20.7275	22.8114	21.8374	22.2072	20.9259	23.1199	21.1588	23.2278	21.1573	22.5331	23.1021	23.5701	22.5336	22.7988	22.8329	22.5396	22.1838	23.4252	22.8497	22.0963	22.5489	23.0956	6.52817	22.6526	6.54523	22.6838	6.31396	23.0758	6.61893	23.7441	6.26575	22.8231
	43679.2	58	21.4291	21.941	22.7763	21.5157	22.3573	21.3748	20.3977	20.6401	22.2894	22.2089	23.1338	22.1626	21.4297	20.6946	22.1836	20.7499	23.249	21.2968	22.1734	20.4998	22.5049	20.968	23.1705	21.4681	22.7694	23.421	23.4672	22.7728	22.519	22.0618	22.0701	22.3409	22.799	23.8761	22.9064	22.2765	23.3137	6.62008	22.4409	6.62921	22.0344	6.32203	22.8403	6.6668	23.3459	6.34812	22.1683
	43679.3	60	21.6042	21.6965	22.2507	21.8545	23.0681	21.0711	20.5849	20.821	22.4962	21.7704	22.9003	23.0332	21.4116	20.6729	21.7944	20.6205	22.8372	21.2833	21.5891	20.3703	23.2184	20.6819	22.9693	20.5397	22.8662	22.7373	22.0137	22.7472	22.6067	22.1107	22.2486	21.4905	21.7019	24.0035	21.9129	22.021	21.8236	6.70713	21.3988	6.76796	21.8845	6.38085	22.5285	6.70261	22.9791	6.41567	22.703
	43679.4	62	22.017	21.3658	21.4997	21.6501	23.0077	20.5826	20.2678	21.2307	21.7755	21.1294	22.4363	22.7286	21.0613	19.9675	21.9422	19.2526	22.2743	20.477	21.5338	20.4451	22.2784	20.8592	22.3478	20.655	22.1007	22.7825	22.2986	21.6802	22.461	21.4268	21.3364	21.0997	20.9779	23.0846	21.7627	21.0593	21.7045	6.73443	21.391	6.83916	21.9638	6.48328	22.6811	6.76743	22.3449	6.50296	21.5886
	43679.5	64	21.7797	20.2779	20.7142	21.2956	21.9371	20.9773	20.2287	20.8042	21.3742	21.015	22.7914	22.6818	21.2473	18.9143	20.5224	19.1544	21.6965	19.6929	20.9849	20.4796	21.4993	20.7019	22.6573	20.474	21.7368	23.3628	21.3518	21.2027	22.0099	21.8432	21.3184	21.7532	20.6324	22.8477	21.3705	19.8633	21.4092	6.93075	20.3136	7.00446	22.7045	6.60163	21.7259	6.92302	21.9881	6.6457	22.0628
	43679.6	66	21.2499	19.7716	20.613	20.2108	22.2012	19.1359	19.551	20.5541	21.6185	20.8023	22.691	22.7866	20.3181	18.5546	19.4457	18.3978	20.9203	19.736	20.559	19.6099	21.2343	20.4343	22.1952	19.8974	21.527	22.8329	21.316	20.7066	21.7206	21.2669	20.1919	20.676	20.1596	22.273	20.9835	20.2856	20.5147	6.88486	19.7648	7.00678	21.2105	6.65143	20.8101	6.98104	22.5931	6.67689	21.55
	43679.7	68	20.3004	19.7487	20.549	20.0827	21.8606	18.5746	19.9238	20.7651	21.1956	21.064	23.1782	22.7328	20.7455	17.9479	19.1642	18.2616	20.9381	19.4919	20.2169	19.5146	21.5555	20.0197	22.0583	19.8498	21.1535	21.5368	20.7521	20.5896	21.9549	21.3722	20.5734	20.9528	20.3511	21.7946	21.6497	19.5183	20.3461	7.14967	19.8294	7.32507	21.4021	6.91784	20.6914	7.28398	22.0137	6.93149	21.6502
	43679.7	70	19.6054	19.1903	19.8432	18.812	19.9823	17.5426	19.921	21.0048	19.605	19.7805	21.4134	22.3582	19.4057	17.3601	18.3912	17.5184	20.6796	18.4727	19.4235	18.5347	20.7555	19.7824	21.7426	18.6063	20.2852	21.4787	19.6698	19.2634	21.3534	20.6956	19.3806	20.3286	19.767	21.6712	20.3574	19.0505	19.4245	7.0979	18.7747	7.21538	20.4737	6.85868	20.9121	7.1619	21.3403	6.77653	20.6368
	43679.8	72	18.856	18.0349	18.9116	17.7688	20.0834	16.8907	20.2254	20.7295	19.5704	19.9947	21.394	22.6113	18.6303	16.5184	17.9648	17.1832	20.3424	17.8213	18.2565	19.2117	19.9369	19.529	21.5584	17.7941	19.0068	21.3178	19.232	18.7062	20.9986	19.5564	18.6818	19.7224	18.7696	21.2002	19.7873	18.2739	18.6681	7.12817	18.3031	7.28562	19.7819	6.83613	20.132	7.17305	19.7144	6.82154	19.694
	43679.9	74	18.0509	17.6918	18.4758	16.9376	19.231	16.6912	18.741	19.8225	18.9434	19.0123	21.8587	22.1538	18.304	16.2131	17.7276	16.068	19.4735	17.4626	17.6693	18.3951	18.7371	18.6593	20.3676	17.4934	18.5543	20.0557	18.2361	18.7707	20.2646	19.8507	18.0487	19.5555	18.1681	19.8944	18.6814	17.5688	18.3225	7.16932	17.1172	7.32531	19.5441	6.85126	19.0911	7.27052	19.5086	6.86343	18.9407
	43680	76	17.1039	16.6918	17.5715	16.9986	18.6244	15.9969	18.6325	19.1844	18.1259	19.3114	20.7353	21.748	17.6163	15.6836	16.6396	15.9247	19.3079	16.4157	17.1449	17.6041	18.769	17.8955	19.7163	16.9289	17.7191	19.941	18.0914	17.5203	19.587	19.5522	17.0365	18.6994	18.2894	19.3234	17.9956	17.4423	17.5412	7.19053	16.8097	7.3707	19.1966	6.94354	18.3352	7.30534	18.7539	6.87714	18.0352
	43680.1	78	16.5821	16.211	16.4263	15.9017	17.8005	15.1949	17.8776	18.6825	17.5893	18.922	20.1026	20.8657	17.4976	15.3762	15.7079	15.4645	18.0431	15.5094	16.4305	16.8492	18.0451	17.5965	19.1348	16.2487	17.4396	18.8237	17.1152	16.8761	19.0218	19.6033	16.4829	18.1914	16.9994	18.7591	16.2478	16.14	16.46	7.25674	16.2194	7.40606	18.4128	7.00751	18.1017	7.33574	17.3868	6.97686	17.4249
	43680.2	80	15.827	15.8907	16.247	14.9102	16.6928	14.622	17.5392	19.0907	17.3449	17.7782	19.3887	20.7401	16.3154	14.7023	15.0951	14.4457	17.3446	15.7045	15.8761	16.1599	17.6243	16.4123	18.5918	16.248	16.4132	18.1918	17.0848	15.7895	18.0445	18.3129	15.9105	17.8645	16.3037	18.0957	16.6107	15.4819	15.8201	7.27414	15.7776	7.47339	18.0959	6.99888	17.0811	7.40836	16.9205	7.08246	16.7247
	43680.2	82	15.4141	15.1689	15.3954	14.7232	16.4702	13.917	16.6913	19.2339	16.936	17.052	19.1427	19.414	16.1111	14.1942	14.3549	13.9903	16.2729	14.916	15.1257	15.7667	16.7453	15.6438	18.2829	15.374	16.2183	17.6414	15.9147	15.4976	17.8867	18.1679	15.3795	16.5684	15.6594	17.1833	16.0325	15.1467	15.2767	7.31773	15.3456	7.55774	18.0866	7.05155	16.7537	7.51777	16.7644	7.13217	16.0903
	43680.3	84	14.9749	14.5719	14.8048	14.1734	16.1027	13.8128	16.0556	18.4433	16.1859	16.276	17.7152	19.199	15.1426	13.3638	13.4034	13.5376	15.6724	14.7198	14.9802	15.0244	16.5323	15.2902	17.3708	14.7743	15.2009	16.3132	15.1753	14.7513	17.6897	16.7972	14.2532	16.3591	14.9685	16.6609	14.918	14.6043	14.7602	7.44511	14.3402	7.60973	17.3599	7.10465	16.3693	7.53496	16.1239	7.20907	15.0642
	43680.4	86	14.1904	13.825	14.0964	13.8224	15.1362	13.58	15.8048	17.2302	15.6792	15.6013	17.1142	18.1118	14.5998	12.8702	12.9646	13.3982	15.011	14.3219	14.0663	14.3909	15.7197	14.9033	16.7072	14.2299	14.5342	16.122	14.679	14.142	17.3555	16.7156	13.7913	16.1614	14.796	15.7565	14.3899	14.356	14.3717	7.45498	14.335	7.66312	16.8926	7.19318	15.6194	7.51187	15.5688	7.2589	14.6616
	43680.5	88	13.9203	13.66	13.7347	12.9621	14.7091	12.5307	15.5051	16.9048	14.9863	15.0076	16.8555	17.6859	13.9324	12.4526	12.7381	12.5895	14.5767	13.31	13.2144	13.8238	15.8072	14.4859	16.4814	13.7927	13.8022	15.3102	14.0213	13.6948	17.1301	16.061	13.2889	14.9639	14.0478	15.3406	14.2029	13.4695	13.8755	7.47658	13.5291	7.63191	15.8695	7.21274	15.0434	7.69155	15.5301	7.27449	13.7429
	43680.6	90	13.4564	13.1196	13.0503	12.3756	14.2343	12.4036	14.8977	16.081	14.1599	14.8119	16.2096	16.662	13.2616	12.2421	12.1091	12.4186	14.1416	13.0226	12.6284	13.5437	14.6401	14.0437	15.6651	13.2784	13.2228	15.0413	13.5922	13.2904	15.9356	15.361	13.0408	15.2125	13.7671	14.1585	13.819	13.0172	13.3047	7.52735	13.1768	7.77975	15.7568	7.26885	14.6174	7.68243	14.8318	7.32399	13.3244
	43680.7	92	13.0128	12.9868	12.6428	11.9069	14.0569	12.0852	14.2908	15.7113	14.016	14.5147	15.501	16.3445	12.9602	11.7562	11.9756	11.8177	14.0673	12.4467	12.7197	12.5541	14.2308	13.6841	15.2084	12.9008	12.6615	14.8143	13.2978	13.3904	15.9181	14.7331	12.6178	14.2176	13.3315	13.7644	13.1814	12.9957	12.554	7.65404	12.3481	7.82149	15.2512	7.42297	13.6339	7.76807	14.3809	7.45545	12.95
	43680.7	94	12.6789	12.0411	12.0783	11.8475	13.72	11.7271	13.6965	14.9118	13.4124	13.8437	14.7782	15.6659	12.2894	11.2413	11.4717	11.6682	13.7491	12.6123	12.522	12.3044	13.7756	13.2947	14.1038	12.4957	12.4117	13.8454	13.022	12.5295	15.0233	14.987	12.4929	13.9916	12.8773	13.5539	12.3345	12.3729	12.2644	7.68889	12.1891	7.87252	14.7968	7.37493	13.1413	7.85413	13.9333	7.47612	12.685
	43680.8	96	12.0667	12.0558	11.8923	11.4433	13.0814	11.3366	13.118	14.4253	12.9703	13.819	14.128	14.975	11.9635	11.1386	11.1087	11.3224	13.1672	12.1576	12.0114	12.1468	12.8121	12.8811	13.8487	12.1092	12.07	13.1227	12.5166	12.0581	14.7218	14.2541	12.1506	12.9476	12.2823	12.9795	11.9449	11.9084	11.7181	7.74167	11.9196	7.8582	14.442	7.46338	12.7246	7.82396	13.3299	7.50185	12.0185
	43680.9	98	11.5789	11.6724	11.4269	11.0861	12.695	11.0376	12.7493	14.3464	12.9488	13.3893	13.9496	14.8225	11.4032	10.9512	10.7659	11.0376	13.1706	11.6217	11.7625	11.7145	12.7395	12.621	13.4998	11.592	11.7368	12.7888	11.889	11.8216	14.214	14.2853	11.7554	12.8733	11.6721	12.415	11.8637	11.6229	11.4007	7.73313	11.3985	8.01562	13.8351	7.50435	12.492	7.89623	13.1844	7.58964	11.7086
	43681	100	11.2594	11.2625	11.0668	10.7844	12.0416	10.7203	12.4117	13.6368	12.1609	13.2873	13.7322	14.3109	11.2624	10.6195	10.6082	10.6598	12.3714	11.3844	11.3046	11.1386	12.622	12.2907	13.3099	11.811	11.4786	12.4103	11.7422	11.8096	13.5706	13.4107	11.4323	12.457	11.4843	12.1055	11.5566	11.2207	11.2724	7.81029	11.0556	8.12139	13.5034	7.556	12.0849	7.92687	12.4736	7.68014	11.2357
	43681.1	102	11.1868	10.8263	10.9221	10.3676	11.7824	10.4075	12.34	12.6954	11.8279	12.9924	12.8481	13.2781	11.191	10.5	10.2111	10.9172	12.2052	11.0962	11.1122	11.2388	12.1994	11.858	12.635	11.407	11.0364	12.2555	11.3265	11.4273	13.0493	12.8088	11.386	12.0289	11.4067	11.6398	11.1755	10.8617	10.9642	7.8876	11.0505	8.17791	12.9163	7.60931	12.0933	8.00928	12.1382	7.70437	11.1556
	43681.2	104	10.6746	10.6942	10.7804	10.5709	11.7109	10.0919	11.6881	12.6458	11.5035	12.4825	12.7223	13.2753	10.6483	10.4123	9.95645	10.265	11.8053	10.8984	10.7729	10.7067	11.734	11.6616	12.6356	11.3673	11.1144	11.731	10.9177	10.8986	12.6374	12.6718	10.8553	11.6945	11.1319	11.4304	10.7236	10.8124	10.7798	7.90175	10.9194	8.19648	12.9057	7.68669	11.3591	8.02457	12.2087	7.75917	10.8762
	43681.2	106	10.6904	10.6234	10.6531	10.0428	11.3467	9.73868	11.4712	12.2882	11.3906	12.1818	12.5709	12.5528	10.7195	10.0847	9.99331	9.994	11.3428	10.7546	10.6042	10.4636	11.3385	11.2749	12.0471	10.9294	10.7387	11.418	10.6527	10.7607	12.0832	12.1355	10.7164	11.4065	10.9193	11.1044	10.3948	10.4504	10.2953	7.96721	10.4604	8.12607	11.9883	7.7048	11.3629	8.10928	11.7036	7.85095	10.8838
	43681.3	108	10.5668	10.4104	10.4028	9.92132	10.9983	9.8317	11.2104	12.0901	11.3757	11.6495	12.1845	12.4524	10.4412	9.76799	9.61682	9.76474	10.5982	10.2164	10.1521	10.0574	11.1745	10.8612	11.787	10.6941	10.5864	11.2489	10.5132	10.7119	11.5727	11.7222	10.6209	11.2284	10.6434	10.8008	10.1994	10.5466	10.2781	8.02542	10.0848	8.24453	11.9567	7.70733	11.0765	8.07242	11.6375	7.9033	10.3573
	43681.4	110	10.2426	10.3813	9.89234	9.39779	10.782	9.55112	10.9665	11.7648	10.9611	11.4873	11.4682	12.0614	10.0847	9.84315	9.34207	9.67778	10.5365	10.1154	10.2843	10.2098	10.9933	10.5253	11.6579	10.2366	10.3556	10.9525	10.4504	10.5291	11.2093	11.0964	10.2687	10.6704	10.4816	10.7675	9.9775	10.2121	10.0143	8.0675	10.2221	8.33527	11.4611	7.85802	10.6129	8.20851	11.3056	7.91771	10.2016
	43681.5	112	9.93828	10.2094	9.93668	9.13054	10.5175	9.30478	10.7547	11.4412	10.8247	11.5382	11.2983	11.7449	9.93788	9.51387	9.4238	9.63193	10.4485	9.92676	10.0369	10.0011	10.8055	10.2751	10.9355	10.2526	9.7149	10.634	10.1148	10.1062	10.8277	11.0387	10.1322	10.6306	10.2553	10.5501	9.93007	10.1354	9.85066	8.1198	9.91711	8.37336	10.9545	7.84515	10.2696	8.26994	11.3421	7.97391	9.82934
	43681.6	114	9.74149	9.92087	9.55134	9.1762	10.5328	9.06439	10.4686	10.7283	10.491	11.3578	10.9305	11.4756	9.71307	9.39245	9.00334	9.26777	10.1119	9.80263	9.8599	9.63601	10.5478	10.2388	10.6275	9.69069	9.8048	10.3422	10.0295	9.8759	10.4071	10.4361	9.93192	10.35	10.0674	10.3535	9.44052	9.90301	9.96723	8.10364	9.73864	8.4248	10.6	7.93605	10.2381	8.40362	11.1963	8.05567	9.76131
	43681.7	116	9.76036	9.41224	9.41147	9.07535	10.1769	9.26749	10.5956	10.8158	10.4887	11.1581	10.9068	11.5481	9.6253	9.30571	8.8472	9.21343	10.0427	9.51298	9.56183	9.77363	10.3925	9.98631	10.5952	9.56378	9.51222	10.4568	9.5709	9.5166	9.97408	9.99577	9.73705	10.1625	9.76471	10.2757	9.28255	9.5031	9.69797	8.20936	9.65177	8.52864	10.1406	8.06922	9.92085	8.44153	10.8904	8.05133	9.72807
	43681.7	118	9.47365	9.32676	9.42625	9.10454	9.97637	8.7598	10.0115	10.5451	10.2206	10.7167	10.6054	11.3437	9.55571	9.06694	8.83589	9.04709	9.86789	9.53799	9.42735	9.40632	10.2354	9.73053	10.1617	9.38557	9.51215	10.3224	9.24538	9.5375	9.40327	9.65006	9.4092	9.99503	9.71378	10.0338	9.11149	9.49206	9.47968	8.19455	9.50333	8.46617	9.63368	8.06558	9.805	8.4225	10.543	8.0663	9.76438
	43681.8	120	9.19979	9.1051	9.13912	8.78966	9.71387	8.82576	9.87068	10.3472	10.0892	10.3358	10.1604	11.1101	9.29119	8.93481	8.62058	9.04839	9.58883	9.07934	9.35199	9.38145	10.1616	9.24908	9.97306	9.1648	9.07175	10.195	9.46258	9.40423	9.27334	9.08535	9.35318	9.74787	9.3052	9.94089	8.89534	9.24344	9.23786	8.29335	9.14805	8.58815	9.16808	8.11343	9.67279	8.52975	10.5648	8.18128	9.33727
	43681.9	122	8.94651	8.88778	8.81509	8.64444	9.58865	8.81957	9.64293	10.046	9.87507	10.2278	10.023	10.4085	8.99646	8.68817	8.43488	8.89985	9.48092	8.94177	9.18573	9.18272	9.83211	9.10166	9.564	9.10063	8.66277	9.6669	9.18688	9.01067	8.73869	8.61178	9.34906	9.56331	9.26665	9.83263	8.56135	9.2415	9.16878	8.35518	8.96701	8.59703	8.74973	8.14815	9.50463	8.47333	10.0748	8.18211	9.22772
	43682	124	8.89064	8.88867	8.68182	8.70731	9.35229	8.31024	9.54985	10.0576	9.46992	10.2809	9.90143	10.4216	8.92433	8.55565	8.1987	8.62189	9.21796	8.86377	8.80851	9.03516	9.49477	8.80346	9.78185	9.03384	8.64963	9.78321	9.04042	8.83356	8.45039	8.39349	9.23477	9.56295	8.95758	9.47685	8.5548	8.83938	9.05825	8.36657	8.67567	8.63913	8.23439	8.26254	9.22007	8.66051	9.95219	8.2279	9.27218
	43682.1	126	8.79189	8.88002	8.58449	8.42825	9.22179	8.43346	9.11988	10.0591	9.377	9.78726	9.54289	10.1982	8.55217	8.38357	8.19678	8.54361	9.08865	8.83962	8.92654	8.70216	9.36602	8.86119	9.72085	8.63471	8.56821	9.45556	8.90174	8.72925	7.90771	8.0841	9.02356	9.1388	8.8102	9.07472	8.38621	8.82199	8.96608	8.43258	8.65356	8.80041	7.94766	8.31189	9.12606	8.68139	9.73429	8.3897	9.14757
	43682.2	128	8.69157	8.64334	8.70839	8.2989	8.83307	8.10816	9.04842	9.87732	9.50336	9.74733	9.21	10.1659	8.38393	8.37711	8.13246	8.32594	9.06989	8.39291	8.87647	8.40179	9.08363	8.81792	9.39169	8.52982	8.5634	9.42191	8.58941	8.38549	7.42116	7.5581	8.88726	9.13932	8.50206	9.00466	8.36781	8.63872	8.80415	8.46605	8.46367	8.77242	7.39383	8.48719	8.96019	8.68651	9.53081	8.34592	8.96508
	43682.2	130	8.4949	8.52931	8.42653	8.09714	8.74906	8.08977	8.68947	9.60012	9.16493	9.65485	9.0286	9.66879	8.47581	8.21177	7.95042	8.27166	8.76904	8.39612	8.59523	8.37969	8.91675	8.66373	9.11214	8.17191	8.46	9.38463	8.2739	8.45395	7.05942	7.1958	8.74695	8.77019	8.38544	8.86702	8.03228	8.28266	8.57926	8.56845	8.31504	8.81218	7.05914	8.51781	8.9659	8.71635	9.27851	8.43242	8.80132
	43682.3	132	8.26944	8.26177	8.29717	7.93971	8.57763	7.83915	8.60683	9.39528	9.07663	9.64743	9.02091	9.9227	8.2514	8.21143	8.03624	8.0143	8.64139	8.12726	8.30749	8.06944	8.8982	8.30487	9.10332	8.27882	8.15906	8.94703	8.1386	8.01121	6.68636	6.88953	8.50744	8.50389	8.08642	8.65313	8.16788	8.20691	8.4552	8.54617	8.1574	8.90993	6.8307	8.49475	8.65761	8.87176	9.20298	8.41976	8.77167
	43682.4	134	7.95004	8.15117	8.33993	7.91319	8.3268	7.7135	8.69449	9.24714	8.94234	9.56477	8.79251	9.55375	8.265	7.99623	7.84198	7.89181	8.43904	8.15209	8.11125	8.02726	8.70352	8.07064	9.06817	8.05934	8.0052	8.91605	8.01753	8.19738	6.42308	6.56277	8.2026	8.2991	8.13818	8.41009	8.04829	8.11479	8.21725	8.61503	8.16306	9.02883	6.5202	8.66201	8.65425	8.89439	9.26735	8.53244	8.40415
[truncated: 193 more columns]

## Sheet: Plate 2 Confluence 1
	Vessel Name: 190730_RPE1_KCGS_Plate_2		C3	D3	E3	F3	G3	H3	I3	J3	K3	L3	M3	N3	C4	D4	E4	F4	G4	H4	I4	J4	K4	L4	M4	N4	C5	D5	E5	F5	G5	H5	I5	J5	K5	L5	M5	N5	C6	D6	E6	F6	G6	H6	I6	J6	K6	L6	M6
	Date Time	Elapsed	GSK1838705	GSK1838705	GW830263A	GW830263A	BI01125081	BI01125081	BI00614644	BI00614644	THZ1	THZ1	PFE-PKIS 3	PFE-PKIS 3	GSK1838705	DMSO	GW830263A	DMSO	BI01125081	DMSO	BI00614644	DMSO	THZ1	DMSO	PFE-PKIS 3	DMSO	GSK872	GSK872	TPKI-100	TPKI-100	GW280670X	GW280670X	GSK114	GSK114	GSK2219385	GSK2219385	BI00036838	BI00036838	GSK872	Torin	TPKI-100	Torin	GW280670X	Torin	GSK114	Torin	GSK2219385	Torin	BI00036838
	43676.8	0	17.2939	20.3336	16.3479	23.3358	14.425	29.0606	14.4138	18.781	15.8572	18.7275	10.9597	14.3932	18.3228	11.3075	22.4286	12.4523	17.3488	12.4108	23.2432	10.3426	16.7983	17.1185	13.93	16.8471	18.3237	25.2446	21.517	28.5126	21.6885	26.4795	17.5641	18.6266	18.7186	20.6298	14.1436	25.241	23.0566	12.84	30.1594	14.1414	23.6434	22.7794	18.1495	10.2352	19.4882	10.1514	17.076
	43676.9	2	18.7969	4.109	18.3554	22.5334	16.8208	28.7582	16.0305	19.0728	16.8989	19.6218	11.7933	15.0673	19.9762	23.668	23.9624	17.2896	17.75	16.0856	26.3426	13.8591	18.3013	16.5471	15.5128	16.5567	19.9221	25.7902	26.535	29.5931	22.9549	26.4581	19.5876	20.1661	18.491	22.1983	15.8962	23.6506	21.9311	16.3984	31.5018	29.8108	23.6657	21.3594	19.2046	21.9508	20.6953	13.7851	17.8432
	43677	4	20.5335	27.9589	19.422	24.0457	19.1578	29.5764	18.6901	19.7926	19.2098	21.0895	13.6883	14.5584	22.631	22.7579	25.5997	21.0274	17.6939	18.3735	29.0296	15.8934	17.9843	17.3675	16.7988	17.7069	22.1594	24.9194	27.7891	29.4333	25.2546	26.9006	21.862	20.0044	20.6817	20.865	19.361	26.0776	23.9873	17.2103	33.5621	29.9868	26.0089	24.058	2.85402	2.31438	20.6542	15.2585	2.71307
	43677.1	6	22.7304	28.1267	20.7037	25.3347	21.2221	32.2166	18.7994	23.0195	20.3827	22.4507	14.6297	15.9829	22.1894	25.886	26.1862	24.416	20.5925	22.9351	31.0822	17.9339	20.8278	17.6165	18.1517	19.1119	23.8955	28.0996	28.1016	31.6158	25.9462	29.2989	23.6316	22.5604	22.5721	22.8386	20.1218	27.0629	26.885	18.8428	35.3189	31.1047	26.2321	24.1331	22.3107	25.3264	23.3833	18.3848	21.5084
	43677.2	8	25.3122	31.0665	23.8894	27.6918	23.6883	36.2163	20.6825	23.8908	22.6686	24.3678	15.7164	17.805	22.9317	25.4329	28.9117	27.4095	21.9794	23.63	31.4618	19.594	23.3706	17.9978	18.8346	20.4323	25.2953	30.9191	31.2077	34.2446	27.5636	30.5762	26.8146	23.1697	24.0509	25.2713	21.8174	29.4126	29.417	21.0235	35.5034	33.8023	29.933	26.379	22.502	26.8423	25.204	21.1363	23.0351
	43677.2	10	27.9676	35.0046	25.7142	29.2526	25.132	35.6491	22.4026	25.6728	23.744	26.0352	18.3151	18.9103	27.4223	26.3868	30.5006	28.7735	23.5563	27.9756	34.4533	22.9594	24.4347	20.9851	19.9937	23.4133	28.534	33.6187	31.5554	35.2107	30.2639	34.2284	27.265	24.8558	25.0838	25.9451	23.0786	31.2151	27.212	23.7673	38.4311	34.2461	31.408	28.9113	24.157	27.5749	27.9506	24.5476	23.9188
	43677.3	12	29.8233	37.9251	27.9102	32.1329	29.1337	39.9666	24.1151	26.9091	25.8724	26.7338	18.7875	21.3296	27.9826	28.3081	32.1302	33.3617	25.5333	30.9294	38.1637	24.8372	26.0383	22.5544	22.8395	24.1758	30.3306	30.5029	36.745	37.3983	31.5754	37.2817	29.3496	25.6573	28.6211	28.4188	25.8815	32.8867	29.9872	23.8931	43.3702	35.9553	34.1148	29.3561	26.3633	28.1176	30.5085	27.4108	26.8503
	43677.4	14	31.1826	38.0085	31.3223	35.6861	30.6439	43.1096	26.3012	29.5988	28.3078	29.4449	19.9374	21.8269	31.4993	31.6062	36.7552	33.9187	26.5757	34.4191	41.1919	27.8706	27.3273	23.2052	23.9559	24.2053	32.18	35.4017	36.5095	39.9273	33.5804	37.9387	32.9584	27.846	31.3103	30.4	29.0494	35.1042	35.6883	27.2733	47.8323	37.0151	37.1399	29.2033	29.8411	30.4656	32.0353	29.8057	28.9291
	43677.5	16	33.7867	42.894	31.3677	38.627	32.8254	45.8568	26.5898	31.6791	31.2024	32.6775	22.4139	23.856	33.0227	32.6318	39.1583	37.267	29.2233	37.3252	41.876	30.6307	30.5981	26.0941	26.3651	28.4501	34.9862	40.671	39.9539	43.8988	37.3865	39.6929	32.984	31.0134	33.4978	32.7845	30.9045	38.2951	38.5945	28.9932	50.0316	38.6985	40.352	30.4609	31.9251	30.3609	33.1635	33.1783	32.3401
	43677.6	18	38.8509	48.1134	38.4317	38.8172	35.7442	48.94	30.3871	34.0779	34.0475	36.0748	25.3432	26.984	34.058	34.6427	44.747	42.0638	31.1387	41.8068	44.3332	32.5413	33.1406	27.7341	29.13	29.1618	38.7227	40.6819	43.7721	47.3614	39.594	46.1627	38.0377	33.1276	35.5133	36.2319	33.5595	42.0188	40.137	30.3545	53.5553	40.4504	44.1693	31.0416	35.3079	32.1125	37.1158	35.0502	34.4347
	43677.7	20	41.1006	51.0828	41.822	43.1494	39.0767	50.894	33.8562	37.0714	37.7416	39.4948	26.978	27.2433	40.0417	42.9555	47.3727	48.3985	33.8467	45.4412	48.6107	37.1036	36.7716	30.434	31.8922	32.764	43.2789	47.9119	46.1655	51.3051	42.7428	46.9441	39.6981	35.9648	41.6268	39.4457	36.1424	46.5577	43.016	31.3902	55.6945	40.9979	48.426	31.0525	38.0148	33.7534	40.9605	33.7888	37.7617
	43677.7	22	45.6519	55.3883	47.2058	49.1423	42.1736	56.0798	37.081	38.6589	39.7701	41.9958	28.3605	30.5832	43.105	46.4087	50.1435	53.9027	35.9647	47.5581	49.8768	41.1984	39.5338	31.0107	34.2527	33.9714	45.3836	51.0633	49.9962	52.8105	46.6305	51.5894	46.0355	36.8995	47.1355	43.6808	41.0714	49.8413	43.8192	32.4284	61.0465	40.5466	50.4217	30.2627	39.8181	32.4389	44.051	36.4112	40.0508
	43677.8	24	49.5379	56.0089	51.6857	54.6295	46.4197	62.4652	37.9644	42.95	44.751	47.2705	33.1003	34.9047	47.9096	50.0389	59.2041	59.9829	41.6206	55.3559	58.732	44.3944	43.0451	38.6247	39.8299	40.3665	50.0551	53.3421	57.4231	60.486	52.1272	55.6304	50.6353	42.8371	52.3021	47.0258	46.6496	53.3836	49.0393	33.3403	64.0689	41.2863	55.3368	32.769	45.0069	34.5204	46.4109	38.3741	44.0628
	43677.9	26	50.7646	61.0802	52.5353	58.2276	50.6389	63.8772	43.8689	46.0047	46.7967	50.7633	35.4955	37.1878	51.0414	51.3992	61.9224	63.6212	49.1245	56.4267	60.1412	49.9654	47.8889	38.9858	40.4567	41.0637	56.466	58.0761	56.3477	61.9231	51.1985	57.2641	52.5157	46.24	55.3249	50.0211	50.1695	52.8004	56.9387	33.359	67.8907	41.4529	59.648	32.6923	47.4094	34.609	49.0868	37.6617	44.9226
	43678	28	57.906	66.1913	59.6399	61.4371	56.1419	70.554	48.9047	49.8067	52.4974	52.6952	38.1371	39.7782	58.2994	57.7531	66.728	67.7736	52.3894	63.672	66.2382	53.4621	51.3051	42.6673	45.8276	44.8154	61.3954	61.5968	62.4839	60.3708	56.7009	63.0718	55.8546	50.1219	58.5199	53.0342	52.213	58.9163	59.9423	33.9008	72.6676	41.0842	62.2418	31.8099	49.6297	34.8178	55.1577	39.3745	49.6826
	43678.1	30	62.9222	68.3034	60.691	65.3996	57.5702	70.9934	52.4989	52.5193	55.5197	56.1387	40.9849	43.3552	58.0768	58.8409	71.0426	70.8569	55.544	67.6138	71.5049	56.4386	53.2987	47.9145	51.0076	50.9357	63.8649	67.6637	69.1107	72.1987	60.7706	69.8661	61.0805	50.7976	63.1567	57.8876	56.7727	60.7538	61.4192	34.396	73.9651	41.2735	65.1709	32.5023	55.8332	34.3946	56.8025	38.0025	52.7283
	43678.2	32	66.3931	73.4229	68.7806	69.1061	62.8976	76.4287	56.3125	57.8026	60.2785	60.8301	47.2604	48.1047	62.528	64.0311	77.9535	73.0384	59.2802	71.5449	74.3672	59.5621	58.7865	52.0088	55.3881	55.3309	68.4609	67.679	72.6387	73.2116	63.2039	70.4058	66.0172	55.4123	67.4449	60.9527	61.5531	67.0284	63.7574	34.6006	78.2129	41.377	70.4767	33.8183	56.4203	34.6016	60.0253	38.3858	58.6917
	43678.2	34	72.2607	77.8216	74.6623	75.1211	69.2745	80.7098	63.1061	62.7114	65.5614	67.8213	52.5322	50.3566	74.1412	67.0285	80.6949	79.5938	65.9209	73.1155	78.5974	64.321	64.1541	56.9991	61.0333	59.2751	74.7468	73.557	73.7842	78.5241	70.0828	73.7391	71.1838	59.8861	66.2903	65.1965	66.5872	74.5271	71.46	35.8014	83.2668	42.6185	73.4362	33.5282	63.9948	34.8426	64.2606	38.4504	61.2439
	43678.3	36	77.2293	81.3685	80.7713	79.6506	70.2632	82.4463	69.2858	63.667	70.5536	69.8858	56.4617	55.2343	72.872	68.542	83.6508	82.193	69.5167	80.7063	80.9861	68.2956	68.5831	57.5955	65.1817	64.2584	79.9656	76.463	78.0827	82.8101	75.8996	79.1335	72.9203	64.2051	73.9145	68.1073	67.6745	77.8625	77.0379	35.9312	84.3604	41.2807	80.401	33.6491	65.9612	35.6867	69.0003	39.0881	68.0631
	43678.4	38	80.2028	84.7275	78.795	84.218	76.6382	85.671	68.2533	66.8622	72.5401	75.0233	56.1293	62.1042	80.5571	75.5636	87.2814	85.1871	71.4609	84.7197	84.7143	71.2026	69.4954	64.0524	65.2799	67.021	81.7536	78.1539	84.4411	84.0113	79.1692	81.8406	77.7787	65.8795	77.1422	75.0686	74.4237	81.2757	74.6774	36.052	85.5299	42.3691	81.8563	33.4493	70.8621	34.9075	72.2222	39.1343	70.3988
	43678.5	40	86.4986	88.1145	86.8241	88.3245	79.4932	88.0721	74.4424	70.7574	78.7498	76.9488	63.9484	67.9731	82.4618	82.7461	91.3201	87.4607	78.8156	86.0096	87.2264	75.3344	74.1959	70.7501	72.0924	75.6273	86.0801	85.4022	85.9621	86.6043	82.0776	85.8015	80.1081	69.3813	79.916	79.3356	77.4069	85.5765	83.4664	36.4657	89.2229	42.4231	85.4603	32.48	75.6906	35.049	73.7309	38.723	75.4469
	43678.6	42	88.5351	91.4675	90.3034	90.0118	84.2566	88.7403	79.4725	73.1507	80.816	80.7184	69.1055	70.7775	88.5351	84.4921	93.9084	89.8926	80.2904	89.7682	87.5756	78.1131	76.2542	72.6949	74.7278	80.3495	89.3338	84.5161	87.489	85.978	85.2343	87.5943	84.1609	72.3384	84.9012	79.7511	81.0549	89.099	84.9835	37.3494	90.4554	40.5378	88.1949	33.3135	75.1534	35.2401	76.9367	39.5522	79.0479
	43678.7	44	90.7361	93.6925	92.9192	93.0474	88.4813	92.6195	82.6277	79.8364	84.7215	83.3003	74.4546	72.7909	86.4859	88.7673	95.3444	93.5709	83.8328	92.8096	89.6828	79.5222	81.663	77.0011	78.6748	83.5463	93.7673	87.8461	92.1168	92.3117	89.423	89.7022	89.1643	76.141	86.8	84.4578	83.9868	91.9182	86.3627	36.8408	92.7559	41.7278	90.0486	33.3855	80.9205	35.7369	83.0443	40.8226	81.5689
	43678.7	46	92.9802	95.4595	94.0413	95.4737	90.0185	95.6462	85.6034	79.666	86.112	87.5178	77.3981	80.8189	93.3714	94.2957	96.9611	94.6266	86.7168	93.3417	90.5457	85.1541	80.5594	82.0609	79.0851	87.6353	95.2824	92.0521	93.5594	94.8046	90.572	93.3012	90.0309	81.4097	90.223	89.9403	86.9847	94.661	89.0955	38.009	95.212	42.5117	92.5302	32.6242	83.1928	35.1247	85.2914	40.5612	84.6582
	43678.8	48	95.233	96.7377	96.9647	96.4337	92.4698	96.2092	89.4814	83.9557	90.1638	89.2531	81.9855	83.1839	94.142	92.0187	98.3248	96.1247	90.4147	94.972	94.1192	86.4774	85.4528	85.8935	83.3843	88.6975	96.416	93.6295	92.4243	93.5944	92.522	93.9325	91.5963	82.8562	91.6091	90.3639	89.5392	94.5426	90.2056	37.3694	95.9086	41.5112	93.7518	33.9413	83.5667	35.2329	86.3244	40.7336	86.9981
	43678.9	50	95.7118	97.684	97.6866	97.4755	93.7421	97.0625	90.3657	86.5158	90.8135	91.3835	85.1616	85.9204	95.8503	95.6984	98.549	97.1806	90.8734	96.0362	95.7788	87.8183	87.2474	87.9326	87.6526	92.8666	97.3194	95.1478	94.5695	93.5048	94.4095	94.3159	94.2084	85.8733	93.2168	93.4525	90.6855	96.5189	94.7271	36.6947	96.7072	41.5117	94.7623	33.641	87.7025	35.2706	86.8795	39.5209	89.7206
	43679	52	97.1205	98.1379	98.329	98.1387	96.3898	98.2344	91.5404	91.2079	93.0679	94.2356	88.8409	89.1947	96.5177	97.9644	99.0612	98.1005	93.0165	96.9183	97.5695	90.4725	92.3928	91.5597	90.9847	93.9541	98.5169	96.3967	97.9901	96.6373	95.685	96.9666	95.1754	88.8492	96.2763	94.7561	91.3183	97.6578	96.4761	36.1113	97.7716	43.3725	96.1213	33.7806	89.9576	35.4654	91.5222	39.6673	92.6488
	43679.1	54	97.8155	98.7684	98.8921	98.3899	96.3747	98.2728	94.6312	91.3267	94.0578	93.7175	91.3052	92.1408	97.5617	98.1049	99.4412	98.2769	94.3695	98.0422	97.2436	92.8149	93.7225	92.3294	91.591	95.6953	98.7053	97.8858	98.0902	98.4977	97.0884	97.5401	96.8576	89.1513	95.7247	95.4536	94.7777	97.9469	97.2379	36.3972	98.7437	42.1731	97.7186	33.5422	92.616	36.4695	92.1644	40.3578	94.1788
	43679.2	56	98.1094	99.3005	99.2379	98.9661	97.8788	98.9338	96.0384	92.9412	96.9332	95.6416	92.6042	91.9901	98.7148	98.5016	99.5738	98.9129	95.7905	98.3795	98.2652	92.9536	95.313	94.6482	93.6048	96.8452	99.0233	98.3537	99.1295	98.4365	97.9166	98.0572	97.6803	91.4435	97.4217	97.3584	95.7989	98.9266	97.7185	37.5431	98.2509	43.1629	97.931	34.6484	92.8378	37.3099	93.4458	40.6117	94.095
	43679.2	58	98.8835	99.5909	99.5062	99.2095	98.3723	99.4787	97.0295	94.3751	97.8437	96.4878	94.8097	94.9055	98.4638	98.5899	99.7051	99.4012	97.3621	98.8452	98.974	95.5904	96.3443	95.742	95.4249	97.5351	99.3621	99.0181	99.0916	98.9728	98.079	98.473	98.1041	93.84	97.9258	97.2125	96.3843	98.8765	98.6082	39.789	98.3053	43.1821	98.2105	34.9948	95.0693	38.1015	95.1181	41.3512	96.3744
	43679.3	60	99.1412	99.6639	99.7339	99.2478	98.7302	99.446	97.6627	96.2512	98.4945	97.5317	96.0625	96.2839	99.1334	99.5002	99.7037	99.5114	97.5725	98.9979	99.5189	96.1199	96.8194	97.6146	96.3916	98.6114	99.4252	99.2045	99.1428	99.2157	98.4355	98.961	98.4966	95.1054	98.3924	97.7593	97.6889	99.3083	98.8927	39.2472	98.9054	44.0053	98.597	35.409	95.3581	37.9897	96.624	40.3358	97.1244
	43679.4	62	99.3388	99.646	99.7065	99.401	99.2498	99.6937	97.816	96.316	98.757	98.0449	97.7313	97.3056	99.2993	99.4483	99.7954	99.7016	98.6355	99.6523	99.6092	97.2138	97.6045	98.0887	97.0636	98.9849	99.5163	99.1442	99.5824	99.2308	98.9352	99.1695	98.6369	95.3483	98.8985	98.7679	98.2254	99.6367	99.1815	39.8183	99.1485	43.7494	99.4799	35.4924	96.2587	38.0579	97.1885	41.9365	97.3073
	43679.5	64	99.3126	99.7779	99.7339	99.4714	99.469	99.7785	98.504	96.7757	98.9523	98.5363	98.048	97.6218	99.529	99.6356	99.7748	99.7412	99.1358	99.6856	99.6374	97.4119	98.2628	98.5998	97.9265	98.9828	99.6303	99.5035	99.5292	99.764	99.2159	99.3896	98.7245	96.1438	98.9359	98.8242	98.6828	99.5555	99.2608	39.773	99.4923	44.9817	99.6465	37.1283	96.4592	39.4887	97.4162	41.2338	98.6273
	43679.6	66	99.4466	99.7815	99.8771	99.5252	99.5119	99.7713	98.2846	97.6567	99.2031	98.8518	98.8076	97.8673	99.6466	99.7222	99.842	99.8748	99.192	99.7788	99.5377	97.5394	98.2547	98.7009	98.3102	99.3243	99.7471	99.7285	99.3921	99.08	99.2264	99.2719	98.4608	96.4111	99.0835	98.8127	98.3854	99.763	99.5944	40.1407	99.3323	43.1538	99.6291	37.6148	97.1642	39.3801	97.5357	41.5711	98.3379
	43679.7	68	99.5222	99.909	99.9541	99.8159	99.705	99.8758	99.1345	98.4507	99.6044	99.2525	99.4601	98.7261	99.7499	99.8689	99.8504	99.8783	99.4616	99.8692	99.7504	98.5063	99.1332	99.1232	99.2547	99.5885	99.8505	99.822	99.2622	99.1181	99.5531	99.5665	98.852	98.1363	99.4349	99.1056	99.3665	99.789	99.7743	40.346	99.4515	44.2905	99.7354	39.5757	97.6635	39.5159	98.5188	43.3523	98.8275
	43679.7	70	99.5399	99.8561	99.9511	99.7435	99.8084	99.9284	99.1307	98.6944	99.6072	99.2258	99.3606	98.85	99.7685	99.8962	99.8906	99.9126	99.469	99.9318	99.7527	98.5647	98.9658	99.1929	99.0016	99.3408	99.8786	99.867	99.7451	99.8211	99.5373	99.6127	98.8875	97.7483	99.5279	98.9523	99.3581	99.7188	99.7103	40.7526	99.4465	44.7618	99.7435	38.7666	97.2823	39.0543	98.7222	43.1513	98.9049
	43679.8	72	99.7164	99.8735	99.9348	99.6506	99.7324	99.8571	99.5426	98.7456	99.6152	99.3408	99.5275	98.7591	99.6997	99.9374	99.8418	99.8833	99.6273	99.8767	99.6331	98.6951	99.0692	99.3951	99.2584	99.6548	99.8856	99.8282	99.7788	99.7229	99.5879	99.5637	98.8731	98.2773	99.5797	98.8828	99.5396	99.8753	99.8163	42.0685	99.5204	46.4093	99.7993	40.0103	97.8318	38.3309	98.5749	43.1857	99.0671
	43679.9	74	99.8736	99.8708	99.9562	99.721	99.7812	99.8825	99.3974	98.876	99.7869	99.4146	99.5952	99.3082	99.8052	99.8312	99.9275	99.9776	99.6953	99.9222	99.8016	98.5988	99.0932	99.5642	99.4724	99.7797	99.8718	99.8327	99.6917	99.6955	99.6912	99.685	99.0382	98.525	99.5354	99.0405	99.5114	99.9303	99.8848	41.6644	99.4406	46.7678	99.8855	41.3266	98.3025	40.0913	98.4512	43.7128	98.8868
	43680	76	99.7837	99.8501	99.9375	99.7367	99.7684	99.9034	99.6052	98.9545	99.7841	99.6489	99.7905	99.3042	99.8474	99.9324	99.9265	99.9545	99.7504	99.8626	99.852	98.9994	99.3775	99.643	99.6246	99.7562	99.8987	99.9236	99.7081	99.6587	99.4735	99.6587	98.9609	98.7328	99.6988	99.0509	99.6309	99.9391	99.8651	42.3009	99.6381	48.2685	99.9028	41.7001	97.8908	40.2943	99.2125	43.8495	98.9357
	43680.1	78	99.828	99.9037	99.9645	99.8051	99.7765	99.8536	99.7768	98.872	99.8635	99.7851	99.7925	99.3224	99.8695	99.9179	99.9245	99.9719	99.7249	99.9374	99.8332	98.973	99.3842	99.5848	99.7437	99.8177	99.9334	99.8505	99.837	99.8392	99.6064	99.6718	99.1641	98.7312	99.722	99.2369	99.7446	99.9485	99.7987	43.1903	99.4509	49.0315	99.8884	41.6109	98.465	41.7626	99.1004	43.4783	98.7917
	43680.2	80	99.8256	99.9434	99.9588	99.8668	99.8206	99.8857	99.864	99.2356	99.918	99.6876	99.7676	99.4218	99.8982	99.9069	99.9223	99.9258	99.7913	99.9611	99.867	99.29	99.4456	99.6503	99.8181	99.8336	99.9411	99.9357	99.7905	99.7961	99.5827	99.7284	99.266	98.9279	99.74	99.3053	99.8131	99.8991	99.8252	44.219	99.4664	50.3707	99.9126	42.6238	98.2774	42.4749	99.1239	44.5698	98.7236
	43680.2	82	99.941	99.966	99.9701	99.821	99.6761	99.9122	99.9197	99.5826	99.9082	99.7769	99.8481	99.448	99.8728	99.8868	99.9359	99.9641	99.8181	99.957	99.8399	99.1672	99.4567	99.7599	99.8988	99.8801	99.9423	99.9261	99.9011	99.8943	99.6832	99.677	99.3356	99.1991	99.853	99.3355	99.855	99.9349	99.9531	44.3974	99.5958	50.3184	99.9214	43.7846	98.7298	44.277	99.1984	44.8032	98.8757
	43680.3	84	99.8482	99.9402	99.9569	99.8951	99.7555	99.9568	99.9548	99.5805	99.9095	99.8881	99.9068	99.6912	99.9049	99.956	99.9423	99.9254	99.8084	99.9678	99.7826	99.4935	99.4869	99.7512	99.9231	99.9542	99.9334	99.9292	99.9305	99.9555	99.6323	99.6704	99.475	99.3591	99.8297	99.5164	99.8504	99.9589	99.9615	45.3505	99.7919	53.0192	99.9279	45.1918	99.0733	45.0045	99.2698	45.6843	98.7479
	43680.4	86	99.9639	99.913	99.9804	99.8849	99.7808	99.9457	99.893	99.3693	99.9311	99.8623	99.9155	99.7674	99.8517	99.9608	99.9304	99.943	99.8933	99.9766	99.815	99.2009	99.5002	99.6855	99.941	99.9017	99.9384	99.9246	99.8252	99.8328	99.6198	99.7186	99.4975	99.0798	99.8942	99.6221	99.8608	99.9361	99.9527	46.0316	99.6575	53.1518	99.9208	45.3708	99.1852	46.1012	99.4354	46.7507	98.7543
	43680.5	88	99.9804	99.9317	99.9645	99.9555	99.7755	99.9648	99.9209	99.6364	99.9057	99.8889	99.8729	99.8064	99.8954	99.9349	99.945	99.9844	99.9086	99.9814	99.7742	99.5267	99.5706	99.8646	99.9683	99.8796	99.9183	99.9555	99.8963	99.9245	99.7524	99.5845	99.3827	99.2288	99.8366	99.6742	99.9304	99.9527	99.9344	47.9171	99.6465	53.5356	99.9253	45.965	99.419	46.5693	99.51	48.6505	98.7244
	43680.6	90	99.954	99.9346	99.9854	99.9161	99.842	99.9086	99.9246	99.4756	99.9266	99.8999	99.7875	99.7272	99.8948	99.9465	99.9387	99.9699	99.8762	99.9754	99.7923	99.3955	99.541	99.8636	99.9747	99.8714	99.9148	99.9222	99.7289	99.8905	99.4927	99.7524	99.5754	99.3724	99.8752	99.585	99.7651	99.9713	99.9135	48.2927	99.7082	53.2987	99.9383	46.9666	99.2154	47.7278	99.3668	48.6998	98.8007
	43680.7	92	99.9954	99.9449	99.9697	99.9333	99.8971	99.9514	99.976	99.7291	99.9784	99.926	99.8654	99.8097	99.956	99.9453	99.9738	99.9808	99.9075	99.9923	99.7997	99.5378	99.7994	99.8336	99.9572	99.8957	99.9251	99.9589	99.6522	99.8205	99.5265	99.6557	99.5963	99.5127	99.8961	99.7079	99.9107	99.9889	99.9629	49.3508	99.6413	55.619	99.9745	48.8448	99.3979	49.5376	99.5988	49.2837	98.7807
	43680.7	94	99.9521	99.9179	99.9809	99.9537	99.937	99.9005	99.9816	99.6643	99.9764	99.9456	99.8603	99.7187	99.8403	99.9596	99.9686	99.9952	99.937	99.9753	99.8241	99.593	99.7908	99.7892	99.9595	99.9355	99.9219	99.954	99.7539	99.8205	99.5217	99.7637	99.6601	99.2951	99.9181	99.526	99.8825	99.979	99.9676	50.4208	99.5252	56.5318	99.9618	48.5725	99.386	48.5591	99.6863	49.0237	98.7202
	43680.8	96	99.9313	99.9443	99.9897	99.9758	99.9742	99.9783	99.949	99.7074	99.9757	99.9682	99.8799	99.8095	99.9139	99.9772	99.957	99.9945	99.9369	99.976	99.8876	99.7346	99.8877	99.8377	99.9263	99.8915	99.8915	99.9667	99.8414	99.9036	99.527	99.7284	99.5597	99.3915	99.9256	99.6043	99.8414	99.96	99.9611	50.8455	99.5353	57.0894	99.963	49.4519	99.5707	48.6134	99.6101	49.1206	98.9388
	43680.9	98	99.9148	99.9814	99.9869	99.9411	99.9835	99.9402	99.9451	99.8542	99.9415	99.9585	99.8952	99.8102	99.934	99.9289	99.9733	99.9886	99.8651	99.9583	99.8315	99.7846	99.9085	99.7826	99.9322	99.932	99.9388	99.9652	99.9085	99.9369	99.4224	99.8072	99.7004	99.3474	99.9594	99.6656	99.9325	99.9673	99.9382	50.8247	99.5303	57.4385	99.9805	50.8149	99.4821	49.9517	99.6912	50.7439	98.9756
	43681	100	99.94	99.9521	99.9892	99.9234	99.9878	99.9252	99.9605	99.8124	99.9557	99.9738	99.9204	99.7757	99.9369	99.8759	99.9579	99.9844	99.8567	99.9702	99.8162	99.847	99.8377	99.7568	99.9743	99.9389	99.895	99.9149	99.822	99.8103	99.5291	99.7779	99.7978	99.2441	99.9628	99.7792	99.8524	99.9667	99.9579	52.2447	99.597	59.7569	99.971	52.1063	99.6369	51.4378	99.6098	51.9562	99.0991
	43681.1	102	99.982	99.9771	99.9724	99.9596	99.9917	99.9068	99.9641	99.909	99.9529	99.9911	99.922	99.7861	99.9123	99.8707	99.9471	99.9854	99.8607	99.9822	99.8404	99.7221	99.8408	99.8176	99.9599	99.9344	99.8931	99.8913	99.883	99.8537	99.5463	99.7746	99.708	99.4168	99.9889	99.7264	99.9494	99.9704	99.9564	52.7586	99.5773	59.5398	99.9709	51.6006	99.6964	51.8736	99.6629	52.8245	98.919
	43681.2	104	99.9768	99.9477	99.9712	99.9345	99.9737	99.9276	99.9327	99.9323	99.9596	99.9725	99.9379	99.8357	99.9176	99.898	99.9692	99.9796	99.8315	99.9783	99.8028	99.8581	99.9324	99.7832	99.9312	99.924	99.8545	99.9271	99.9248	99.9714	99.6077	99.6934	99.7901	99.5763	99.9775	99.727	99.9205	99.9613	99.9664	54.0162	99.7046	60.8465	99.9753	53.5224	99.7305	52.5559	99.7711	52.587	99.028
	43681.2	106	99.9547	99.9424	99.9925	99.93	99.9635	99.9092	99.9119	99.9667	99.9493	99.9873	99.9648	99.8756	99.964	99.932	99.9516	99.996	99.8816	99.9655	99.8412	99.8364	99.9432	99.7561	99.9471	99.9434	99.8657	99.9439	99.9146	99.9663	99.6281	99.6467	99.8205	99.3826	99.964	99.7041	99.9483	99.953	99.9454	54.9485	99.7111	63.3702	99.9592	54.6055	99.4997	53.7262	99.7801	54.0636	99.0278
	43681.3	108	99.9602	99.9528	99.9805	99.9478	99.9841	99.9604	99.9338	99.9897	99.9783	99.9873	99.9507	99.8381	99.9702	99.9191	99.956	99.9982	99.8982	99.9736	99.7406	99.8518	99.953	99.6757	99.9496	99.9111	99.8613	99.9159	99.9571	99.9103	99.5448	99.5155	99.806	99.5846	99.9577	99.7066	99.9432	99.9526	99.9861	55.0915	99.5995	64.9935	99.8564	53.7448	99.5157	54.3796	99.768	55.0241	99.1623
	43681.4	110	99.9397	99.9523	99.9902	99.9605	99.9794	99.9676	99.9695	99.9424	99.9732	99.9788	99.9592	99.8618	99.96	99.8583	99.9755	99.9955	99.8699	99.9939	99.7595	99.8703	99.9747	99.7676	99.9559	99.8963	99.8521	99.9541	99.9047	99.9764	99.6462	99.5606	99.8073	99.6223	99.9763	99.7483	99.9567	99.9347	99.8996	57.4897	99.5418	65.9892	99.8278	54.7294	99.5461	55.5968	99.7524	56.5359	99.0649
	43681.5	112	99.9196	99.9682	99.993	99.9391	99.9734	99.9234	99.9734	99.9656	99.9523	99.9852	99.9238	99.9174	99.9474	99.8342	99.9725	99.9878	99.8864	99.974	99.8123	99.825	99.9568	99.7373	99.9569	99.9667	99.8446	99.9554	99.942	99.9282	99.6222	99.6524	99.8192	99.6351	99.9335	99.7832	99.9555	99.9569	99.9738	56.7616	99.6586	65.3388	99.9104	55.9924	99.4774	55.6951	99.7397	57.1965	99.3144
	43681.6	114	99.952	99.961	99.985	99.9594	99.9837	99.9491	99.9475	99.9582	99.9562	99.9723	99.9356	99.884	99.9774	99.9174	99.9639	99.9854	99.8677	99.9816	99.786	99.8632	99.9433	99.7571	99.9396	99.9587	99.8645	99.9218	99.8177	99.6784	99.5774	99.7613	99.8653	99.6063	99.9213	99.8065	99.8876	99.9622	99.9469	58.0671	99.6137	65.8316	99.9372	56.3611	99.4959	57.0908	99.6624	59.4758	99.1453
	43681.7	116	99.9458	99.9689	99.9867	99.9409	99.9863	99.9791	99.9613	99.9809	99.9686	99.9758	99.9343	99.9471	99.9786	99.8541	99.9617	99.9941	99.9069	99.9839	99.7871	99.8593	99.9441	99.7098	99.9323	99.9356	99.8815	99.9632	99.9144	99.9848	99.5507	99.4457	99.8971	99.7918	99.9542	99.7098	99.931	99.9131	99.9726	59.5121	99.3922	68.7123	99.9483	57.5862	99.4665	58.8013	99.7277	59.3484	99.1553
	43681.7	118	99.9351	99.9744	99.9911	99.9113	99.9924	99.9455	99.9774	99.9874	99.9631	99.9758	99.9145	99.9127	99.9637	99.9381	99.9513	99.9916	99.9272	99.9793	99.7063	99.7947	99.9415	99.7367	99.9275	99.8946	99.8749	99.9543	99.856	99.928	99.4901	99.6283	99.9271	99.6495	99.885	99.7816	99.9231	99.9094	99.9841	60.3845	99.6005	68.6897	99.9192	58.7447	99.2678	59.7578	99.7524	61.9407	99.1364
	43681.8	120	99.928	99.9553	99.9876	99.9427	99.9724	99.9694	99.9808	99.9911	99.9704	99.9824	99.9002	99.9124	99.9719	99.8887	99.9533	99.9953	99.9575	99.9908	99.78	99.7796	99.9223	99.8024	99.8972	99.9385	99.8811	99.9308	99.9228	99.9212	99.4304	99.4588	99.867	99.6963	99.9277	99.6541	99.9166	99.8852	99.9764	60.7486	99.422	68.8124	99.8956	60.1908	99.2293	60.3287	99.722	62.5221	99.0686
	43681.9	122	99.9415	99.9415	99.9753	99.9339	99.9816	99.9505	99.9921	99.9862	99.9574	99.9654	99.8573	99.9284	99.9568	99.9042	99.9652	99.9937	99.9443	99.9786	99.7378	99.8584	99.8416	99.8319	99.8773	99.9623	99.8258	99.9802	99.8995	99.9073	99.4938	99.3212	99.8696	99.654	99.9656	99.7763	99.9475	99.8869	99.9734	63.298	99.5162	70.4526	99.8485	60.0212	99.1979	61.2559	99.7267	65.3317	99.2655
	43682	124	99.9647	99.9736	99.9753	99.9135	99.9929	99.9292	99.9937	99.9799	99.9623	99.9849	99.8786	99.9184	99.9568	99.9472	99.9617	99.9961	99.9711	99.9715	99.8289	99.8489	99.8332	99.881	99.9211	99.9747	99.8686	99.9369	99.7941	99.8564	99.2993	99.476	99.9075	99.7452	99.9653	99.8193	99.9479	99.9439	99.9674	63.7031	99.5587	71.7658	99.8406	61.292	99.2639	63.3851	99.7683	63.944	99.1231
	43682.1	126	99.9755	99.9667	99.9844	99.9126	99.9694	99.945	99.9945	99.9734	99.9467	99.9693	99.8717	99.9578	99.9807	99.9208	99.955	99.9906	99.9714	99.9575	99.8361	99.8692	99.788	99.8438	99.8995	99.9376	99.858	99.9695	99.8195	99.8517	99.3284	99.3847	99.9304	99.7027	99.9839	99.778	99.9622	99.9519	99.9673	64.7355	99.6577	74.2318	99.8039	64.0021	99.4691	64.6859	99.8046	67.0717	99.1055
	43682.2	128	99.9743	99.9754	99.975	99.9178	99.978	99.921	99.9897	99.9629	99.9503	99.9799	99.9012	99.9698	99.9708	99.9235	99.969	99.9949	99.9777	99.9706	99.8641	99.8537	99.8445	99.8545	99.9211	99.9587	99.8476	99.9792	99.9329	99.9467	99.3171	99.2769	99.9435	99.7266	99.9738	99.6242	99.9746	99.9443	99.9888	64.6457	99.6526	74.4406	99.741	63.3834	99.5	65.3662	99.8032	65.5617	99.2473
	43682.2	130	99.965	99.9721	99.9918	99.948	99.9925	99.9429	99.9944	99.9902	99.9509	99.9741	99.9387	99.9689	99.9732	99.8952	99.9645	99.9911	99.9758	99.9794	99.9316	99.851	99.7974	99.887	99.903	99.9355	99.8894	99.9434	99.8812	99.9295	99.381	99.1375	99.9158	99.7803	99.9169	99.7295	99.9247	99.9413	99.9755	66.2552	99.5102	74.6073	99.6579	65.0626	99.3932	66.3427	99.8471	68.0199	99.3144
	43682.3	132	99.9728	99.9883	99.9885	99.918	99.9807	99.894	99.9898	99.9816	99.955	99.9661	99.9239	99.9936	99.9781	99.9574	99.9617	99.9964	99.9343	99.9692	99.9597	99.814	99.8192	99.8688	99.889	99.9343	99.8345	99.9678	99.9508	99.9336	99.4347	99.0627	99.9495	99.7143	99.9116	99.7414	99.9363	99.9438	99.9903	66.7112	99.7373	75.06	99.6074	66.3002	99.428	68.9817	99.8078	67.3776	99.3833
	43682.4	134	99.9835	99.9878	99.99	99.8882	99.9938	99.9	99.9938	99.9926	99.9486	99.9753	99.9205	99.9565	99.9873	99.9202	99.9533	99.9945	99.9383	99.953	99.9171	99.8509	99.8328	99.8552	99.9187	99.9297	99.919	99.9646	99.9433	99.9437	99.4083	99.0929	99.8589	99.6531	99.9097	99.7427	99.9516	99.9316	99.9679	68.539	99.6067	76.2858	99.7154	66.9999	99.4466	69.0933	99.8186	68.6699	99.3702
[truncated: 193 more columns]

## Sheet:  Plate 2 Ratio Green_Red 2
	Vessel Name: 190814_KCGS_2		C3	D3	E3	F3	G3	H3	I3	J3	K3	L3	M3	N3	C4	D4	E4	F4	G4	H4	I4	J4	K4	L4	M4	N4	C5	D5	E5	F5	G5	H5	I5	J5	K5	L5	M5	N5	C6	D6	E6	F6	G6	H6	I6	J6	K6	L6	M6
	Date Time	Elapsed	GSK1838705	GSK1838705	GW830263A	GW830263A	BI01125081	BI01125081	BI00614644	BI00614644	THZ1	THZ1	PFE-PKIS 3	PFE-PKIS 3	GSK1838705	DMSO	GW830263A	DMSO	BI01125081	DMSO	BI00614644	DMSO	THZ1	DMSO	PFE-PKIS 3	DMSO	GSK872	GSK872	TPKI-100	TPKI-100	GW280670X	GW280670X	GSK114	GSK114	GSK2219385	GSK2219385	BI00036838	BI00036838	GSK872	Torin	TPKI-100	Torin	GW280670X	Torin	GSK114	Torin	GSK2219385	Torin	BI00036838
	43691.8	0	13.529	14.9343	14.7478	14.8512	14.5644	15.0176	14.4145	14.9774	14.6644	15.2766	14.2419	14.5964	14.1556	14.3767	15.0727	15.6041	15.0185	15.4552	14.7786	15.3003	15.1503	15.0306	15.3105	14.9123	14.0451	15.1581	14.5055	15.112	15.2312	15.3997	14.4985	15.8345	15.4817	15.4165	15.2415	15.3303	14.672	14.1543	15.1631	14.7784	14.9213	14.4055	14.5235	15.0992	14.9694	14.4498	14.5617
	43691.9	2	13.8979	15.2842	15.0558	15.1109	14.7248	15.2946	14.5761	15.2289	15.0374	15.3691	14.7681	14.8808	14.304	14.7833	15.278	15.7691	15.2642	15.8658	15.0964	15.8302	15.6099	15.3625	15.4843	15.2761	14.3891	15.3579	14.7926	15.4303	15.6004	15.7539	14.8193	16.249	15.8487	15.7165	15.541	15.5217	14.7677	12.9655	15.4322	13.6254	15.2522	13.3305	14.9333	13.7719	15.3295	12.9843	14.949
	43692	4	14.1848	15.3861	15.3946	15.2228	15.0579	15.7261	14.8163	15.535	15.5301	15.7318	14.8927	15.2724	14.6155	15.4159	15.5852	16.0412	15.4639	16.0918	15.4863	16.1141	15.8414	15.4805	15.6376	15.4508	14.6147	15.8925	15.1234	15.6896	15.8027	15.9744	15.0551	16.6141	16.2864	16.1814	15.7261	15.8663	15.2622	11.2546	15.6936	12.1968	15.5511	11.8961	15.1798	12.0092	15.6803	11.4168	15.3613
	43692.1	6	14.3821	15.5335	15.7493	15.4467	15.4065	15.9505	15.1289	15.9123	15.988	16.1454	15.3676	15.4291	14.8269	15.7014	15.5407	16.3428	15.6122	16.5142	15.7449	16.6056	16.0893	15.8244	16.0949	15.6767	14.9489	16.1604	15.3763	16.1283	16.002	16.3463	15.3254	16.762	16.6735	16.5385	16.1417	16.2365	15.598	9.87454	16.0508	10.6694	15.8724	10.1243	15.5098	10.6215	16.042	10.1264	15.7626
	43692.2	8	14.5256	15.8814	15.9963	16.1064	15.3716	16.3434	15.2753	16.1184	16.3313	16.4259	15.6432	15.8767	15.2223	15.6753	15.7781	16.5036	15.8901	16.6373	15.9447	16.7506	16.2835	16.1052	16.2675	15.8139	15.2977	16.5918	15.7825	16.3113	16.1516	16.7068	15.9341	17.1126	16.8999	16.7401	16.4228	16.7638	15.6944	8.58052	16.4131	9.31242	16.1644	8.93218	16.0188	9.34026	16.2083	8.93088	16.2619
	43692.2	10	15.3278	16.1871	16.2474	16.1227	15.7765	16.6405	15.4989	16.3607	16.3915	16.5718	16.1268	16.3893	15.6906	16.0341	15.939	16.6683	16.2157	16.7967	15.9732	17.0892	16.7305	16.3239	16.5717	15.8983	15.7888	17.1578	16.0036	16.5613	16.5554	16.8621	16.4173	17.2814	16.9708	17.1378	16.942	17.275	16.0445	7.64046	16.6295	8.14562	16.3771	8.04992	16.433	8.18084	16.5485	7.95787	16.7366
	43692.3	12	15.2664	16.2657	16.3873	16.3287	16.1076	16.9037	15.7375	16.7492	16.5755	17.0772	16.4912	16.6609	15.9038	16.4211	16.4726	16.9037	16.63	17.1156	16.3133	17.3712	17.0892	16.7398	17.1795	16.2109	15.8515	17.2155	16.4087	16.7636	17.011	17.2769	16.8784	17.5825	17.6586	17.5847	17.4225	17.3122	16.2052	7.00362	16.9	7.3962	16.5585	7.40793	16.8344	7.53376	17.0013	7.45514	17.1838
	43692.4	14	15.8202	16.6655	16.7602	16.7048	16.4558	17.2716	16.0048	16.8554	16.9667	17.4799	17.0419	16.8369	16.1682	16.5913	16.8095	17.1851	17.0285	17.5506	16.3726	18.0162	17.5554	17.0647	17.3279	16.6327	16.0423	17.8349	17.0229	17.4689	17.3276	17.5445	17.4449	17.8378	18.013	17.6571	17.8881	17.8284	16.3046	6.50919	17.2988	6.91399	17.0736	6.97608	17.2434	6.92426	17.1616	6.89228	17.7598
	43692.5	16	16.324	17.0145	17.0304	17.1885	16.8858	17.554	16.4923	17.2339	17.3944	17.6551	17.5504	17.2053	16.8319	16.9914	17.2667	17.4111	17.5056	17.5889	16.8146	18.5137	17.9765	17.49	17.6623	16.9139	16.3528	18.3363	17.4591	17.9486	17.6476	17.8902	17.707	18.4032	18.4014	18.3353	18.2353	18.3463	17.1873	6.12347	17.6447	6.51447	17.4632	6.60177	17.7126	6.55021	17.6623	6.65868	18.1892
	43692.6	18	16.2532	17.2474	17.1813	17.5323	17.1412	18.2178	16.4722	17.8208	17.6197	18.27	18.1685	17.5162	16.8731	17.362	17.3321	17.6748	17.9572	17.7934	16.8087	18.7439	18.2339	17.742	18.2437	17.0741	16.6753	18.9689	17.6041	18.095	18.0995	18.3898	18.3629	18.6279	18.5749	19.1831	18.3793	18.707	17.1578	5.78428	18.2198	6.16302	17.9101	6.17399	17.9232	6.08115	18.2066	6.31679	18.7286
	43692.7	20	16.5583	17.673	17.3121	17.8554	17.0405	18.5506	16.711	17.8774	18.4043	18.4056	18.5338	17.8059	17.0261	17.6183	17.2358	18.0172	17.9644	18.2344	17.1237	19.0107	18.592	18.1305	18.4573	17.4788	17.1092	19.3338	17.7901	18.345	18.5828	18.7254	19.0245	19.0551	19.4168	19.225	18.8847	18.9282	17.5375	5.55093	18.5278	5.81311	18.564	5.86336	18.2267	5.79079	18.7929	6.00219	19.5028
	43692.7	22	16.8995	17.8249	17.8059	18.2408	17.3957	19.1606	16.7351	18.0939	18.8589	18.9758	18.9186	18.2094	17.3115	18.0823	17.7402	18.0245	18.7934	18.3579	17.3629	19.4016	19.068	18.7042	18.8255	17.7859	17.5007	19.8518	18.4317	18.8325	18.4656	19.5664	19.5092	19.6075	19.7548	19.8673	19.2141	19.5413	17.5096	5.3744	18.4928	5.61473	18.8412	5.73905	18.8774	5.57945	19.635	5.80444	19.9929
	43692.8	24	17.3142	17.6286	18.4966	18.9309	17.756	20.0689	17.2776	18.4202	19.4862	19.4335	19.4451	18.8093	17.6265	17.9896	18.1075	18.62	19.0962	19.2798	17.5702	20.2649	19.6949	19.8014	19.4757	18.3283	17.792	20.3514	18.6141	19.1377	19.1337	20.2952	20.4394	20.1426	20.8865	20.5474	19.4764	19.839	17.9294	5.2454	19.0241	5.48161	19.7867	5.532	19.9312	5.36547	20.6796	5.59257	20.6259
	43692.9	26	17.5487	18.3969	18.8022	19.89	17.8685	19.6846	17.358	18.4606	19.8859	20.4021	20.1898	19.2321	17.6091	18.1543	19.0207	19.0957	19.5223	19.0331	18.1968	20.276	20.0215	19.7953	20.0445	18.5222	18.4275	21.3624	19.3514	19.8627	19.8103	20.9762	20.6449	20.5219	20.7837	20.8135	20.0042	20.2787	17.9561	5.17284	19.6295	5.40297	20.4937	5.4847	20.2502	5.25741	20.6196	5.47147	20.9602
	43693	28	17.9902	18.753	19.1733	20.0884	18.629	21.1779	17.6806	18.5364	20.1847	20.9845	19.8435	19.5244	18.0422	18.4529	19.0902	19.1428	20.0897	19.4768	18.5055	21.2056	20.9908	19.8549	20.0179	18.6698	18.6541	20.9343	19.7733	20.3933	19.8301	21.0663	21.095	20.6489	21.2632	21.5852	20.2513	20.4106	18.6585	5.12592	19.4811	5.40319	21.1316	5.51562	20.3163	5.31491	21.4326	5.45463	21.6553
	43693.1	30	18.0446	19.0541	19.2816	20.8061	18.9587	21.6307	18.1059	18.8948	20.2353	21.7182	20.5386	19.976	18.6437	19.0628	20.2137	19.3365	21.1661	19.3264	18.8304	21.5903	21.9361	20.1028	20.4818	19.3977	19.1617	21.2103	19.8153	21.2031	20.4897	21.8442	21.7853	21.5699	22.4216	21.5053	21.345	21.025	19.0831	5.17784	19.9502	5.41638	21.9243	5.52349	20.7708	5.27664	21.8025	5.43849	21.455
	43693.2	32	18.2783	19.5995	20.0766	21.5202	19.957	21.6314	18.289	19.7905	20.8794	21.9047	22.3231	20.6521	18.5681	19.0527	20.4494	20.0886	22.0089	19.6914	19.1221	21.5759	22.0644	20.8937	21.7042	20.1292	19.5395	21.6325	20.0551	21.2929	20.3463	21.7619	21.7179	21.6684	22.6694	22.5964	21.2602	21.2077	19.3593	5.19996	21.1264	5.41045	22.1807	5.5826	21.3463	5.39768	22.2724	5.56753	22.1101
	43693.2	34	18.5389	19.4229	20.6546	21.9218	19.3851	21.588	18.5937	19.9777	21.6322	21.8442	22.6832	20.4913	19.1827	19.8466	20.6367	20.1791	21.5275	20.1065	19.0833	22.198	22.19	20.8956	21.8059	20.4675	19.9061	22.3949	21.16	21.8524	21.2527	21.3052	22.0623	22.7531	22.3971	22.6159	21.6292	21.8673	19.7187	5.28536	20.9053	5.46169	22.2092	5.69862	21.982	5.48059	22.071	5.60527	21.6246
	43693.3	36	18.8348	20.164	21.9869	21.3293	20.0448	21.2553	18.6762	19.3428	21.858	21.0789	22.5861	20.7547	19.7194	19.9656	21.3593	20.3176	21.5027	20.2248	19.1723	21.5911	22.6336	21.3378	21.5348	20.4513	20.2628	22.4942	21.1334	21.2798	21.6913	21.6298	21.785	22.7545	23.0082	22.4221	21.4918	21.4764	19.432	5.39733	22.1656	5.54138	21.7116	5.73727	22.2236	5.56269	22.0067	5.67231	21.6283
	43693.4	38	19.9506	20.5255	22.4494	21.8851	20.2428	21.8652	18.9536	19.6282	22.1822	21.8889	22.9666	21.8828	20.1646	20.2208	22.0614	20.4771	21.5098	19.9519	19.7992	21.2813	22.4348	21.787	22.2856	20.6218	20.7956	22.0852	20.9233	22.0654	21.9189	21.8335	22.1424	22.0499	22.4723	22.8549	22.2092	22.4006	20.1766	5.55633	22.1323	5.68316	21.9753	5.83905	22.3092	5.71181	22.9024	5.76484	22.6729
	43693.5	40	20.6372	20.8018	22.3675	22.7357	20.8172	21.1777	19.1126	19.8322	22.0084	21.6156	22.6867	21.6856	20.5305	20.8904	22.1798	21.2029	22.1427	20.1516	19.3795	22.3834	21.7212	21.2965	22.9074	20.682	20.9514	22.805	22.2454	22.1553	22.3777	22.3545	23.1462	23.0623	22.8045	22.7952	21.9806	22.2048	21.185	5.69763	22.766	5.82201	22.0381	5.98031	22.0796	5.84128	23.0984	5.94499	22.2235
	43693.6	42	20.8146	21.198	22.3977	22.6732	20.6864	21.9068	19.2866	19.5649	21.7009	22.5657	22.432	21.8538	20.5387	21.2421	23.2363	20.5834	22.278	20.6458	20.2627	22.1698	22.6335	21.7671	23.9627	20.7264	21.4385	22.5964	22.2465	23.0349	23.128	21.7655	22.9985	23.0306	23.1352	23.0357	22.5527	22.0784	20.9403	5.87272	23.2842	5.93346	22.449	6.10118	23.3863	5.94856	23.1786	6.0564	22.6737
	43693.7	44	20.9377	21.3232	23.1525	22.7396	20.8483	22.3361	19.0962	19.829	21.9808	22.3131	22.7361	21.8325	20.6898	20.6191	23.2055	21.1658	22.6028	21.0148	19.7424	21.6594	22.8715	21.7073	23.5565	21.1136	21.0484	22.8052	22.3586	22.1535	22.41	22.3645	22.5449	23.4057	23.8757	23.9383	22.4177	22.8616	20.8737	6.02238	23.3036	6.01393	21.9347	6.14319	22.0987	6.02153	22.8428	6.12323	22.1073
	43693.7	46	20.0364	21.9762	23.1372	22.9948	21.5539	21.8163	19.2259	19.595	21.5911	22.1714	21.4992	22.1302	21.0751	20.2845	22.667	20.7763	23.0302	20.5765	19.4583	21.4487	22.2116	21.67	22.6059	20.3484	21.366	22.3154	21.9753	22.2259	22.1545	22.3505	22.0717	23.2258	23.0493	22.6628	21.9781	21.7128	20.8458	6.13979	23.0676	6.10541	21.7839	6.2804	22.3851	6.14763	22.4251	6.26986	21.6689
	43693.8	48	20.8447	21.7553	22.5996	23.1275	21.307	21.8298	19.3342	19.8474	21.6574	21.8926	22.6498	21.9918	21.1273	20.9665	22.6839	20.5391	23.6048	20.8663	19.808	21.2962	22.0848	21.2186	23.7113	20.7207	21.2711	22.9161	22.6151	22.3061	22.4816	23.0372	22.0023	22.4238	23.2901	23.7791	22.5534	22.0749	20.7299	6.14413	22.9513	6.19178	21.6631	6.37051	22.5037	6.22033	22.5987	6.32871	21.829
	43693.9	50	21.4567	21.7215	23.1321	22.1769	21.4028	22.0042	19.6064	19.8599	21.6538	21.4525	22.3477	22.0763	21.1277	20.3033	21.7246	21.0611	22.9259	21.0892	19.6431	21.451	22.5212	20.8448	22.8511	21.0337	21.4249	21.7675	22.9265	22.2954	22.1993	21.7051	21.5101	22.4361	23.6335	22.7707	21.9365	21.6621	21.5369	6.27848	22.6392	6.30441	22.1576	6.42619	21.8359	6.30889	22.8605	6.46627	21.6093
	43694	52	21.1684	22.0414	23.4715	22.351	21.8152	21.7786	19.7696	19.8541	21.6028	22.4114	22.028	22.655	21.3579	19.5371	22.4357	20.7077	22.5711	21.2045	19.5081	21.6092	22.5658	20.8738	23.1894	21.6157	21.5332	22.3145	23.0148	21.9216	22.0048	21.9418	22.546	23.1275	22.8294	23.2773	22.2082	21.7557	21.0288	6.32939	22.5632	6.38669	21.9274	6.52894	23.5617	6.37988	22.5009	6.58031	21.8544
	43694.1	54	21.8611	21.6684	24.0782	22.4779	20.7733	22.0673	19.1945	19.5975	21.2622	22.3985	22.2944	21.8046	21.5404	20.125	22.4585	20.1792	21.9389	20.7214	19.5317	20.8145	22.6038	20.518	23.0548	20.9427	21.0709	21.7761	22.423	21.2311	21.8445	21.266	21.4555	21.4644	22.2074	22.4028	21.9786	21.4905	21.409	6.46191	23.3131	6.46927	21.9847	6.64882	22.4746	6.45844	22.7967	6.64984	21.2971
	43694.2	56	20.8716	21.5451	23.3818	23.1722	21.1244	21.4836	19.2323	19.4155	21.3379	21.679	22.589	22.7764	21.8973	20.0946	20.9749	19.4889	22.5124	20.708	19.9702	20.3038	22.1117	20.2702	22.7198	21.006	21.0206	21.1866	22.0726	20.9924	21.6183	21.7591	21.2854	22.2307	22.6398	22.5545	21.5563	21.2777	20.7323	6.49752	22.4586	6.51105	21.9735	6.69106	21.9379	6.57885	22.3062	6.7635	21.8606
	43694.2	58	20.8762	21.5533	22.2731	22.3063	21.0104	21.2625	19.8439	19.14	21.937	21.6215	21.1277	21.9433	21.0681	19.6738	21.8121	20.19	22.7097	20.4875	20.5022	19.7733	22.5349	20.2591	21.8481	20.5977	20.608	21.4161	21.6439	20.7086	21.6556	21.403	20.6636	21.5511	22.2975	21.7426	21.2225	21.3873	20.6057	6.64212	22.3061	6.64729	21.5639	6.78909	21.8962	6.59812	21.6694	6.85648	21.6367
	43694.3	60	20.5975	21.5884	22.2405	21.6171	20.6876	20.5743	19.5019	20.1654	21.8238	20.7191	20.8682	21.3958	21.686	19.2234	21.2292	19.5319	22.1179	20.4738	20.3358	19.1538	21.1634	19.0496	22.0514	20.145	20.9841	20.8872	20.7874	20.3004	21.9783	21.3954	20.5866	21.7207	21.7568	21.6521	21.5289	21.1947	19.9929	6.77853	22.2563	6.69455	21.1273	6.90205	21.6512	6.69252	20.9119	6.96982	21.0453
	43694.4	62	20.9496	21.0891	21.5377	21.2589	20.692	20.0933	19.3407	19.4672	20.4481	20.4941	20.9578	21.5594	20.59	18.8264	20.4655	19.2576	21.6808	19.9177	20.0893	19.1118	21.4455	18.6658	21.6681	19.5923	20.6087	20.6866	20.6955	20.2392	21.6762	21.3163	19.4526	21.2599	20.3614	20.7835	21.4635	21.2195	20.2671	6.92807	21.2214	6.80672	20.735	6.94738	21.5516	6.76581	20.7344	7.0655	20.8649
	43694.5	64	20.6132	21.7538	21.4652	20.1412	20.6318	19.7185	19.7599	19.8526	20.4109	19.5543	20.1394	21.503	20.3595	18.7952	19.915	18.9643	21.3702	19.0719	19.9734	18.3361	20.682	18.1407	21.128	19.7986	19.5291	20.4886	20.8835	19.6315	21.3575	20.3253	18.688	21.2036	20.6013	20.2385	21.621	21.1741	19.8202	6.97457	20.7411	6.85437	20.4413	7.05738	21.4441	6.87165	19.7548	7.22658	20.8181
	43694.6	66	20.3911	20.8357	21.5414	20.1577	20.1989	19.3562	19.6893	19.8777	19.9795	19.1175	19.7028	20.8977	19.877	18.4398	19.3024	18.3649	20.8683	18.3876	20.4517	18.0846	19.7102	17.8148	20.8694	18.8017	19.7099	19.6379	20.6985	19.5712	20.9035	20.3499	18.1634	20.2698	19.6231	19.9838	21.6073	21.0737	19.6583	7.13871	20.1594	7.03753	21.0888	7.229	20.9881	7.01622	19.5493	7.35778	20.562
	43694.7	68	19.6035	20.1958	20.7803	19.7253	19.7673	18.5261	19.6906	18.8906	19.815	18.7541	19.4818	20.613	19.9889	17.5134	18.8986	18.1159	19.5999	17.7293	19.3648	17.5524	19.0949	16.9379	20.4266	18.2633	19.1724	19.9058	19.4289	19.0679	20.2925	19.7055	18.1365	19.3644	19.0831	18.9084	20.9246	20.5772	19.634	7.18706	20.1329	7.12543	19.6904	7.24948	20.9702	7.11805	18.9914	7.42001	20.1574
	43694.7	70	19.6857	19.6939	20.3973	18.5113	19.0183	17.401	19.4553	18.4515	19.9067	17.8517	18.8875	19.5952	19.1647	17.2776	17.8328	17.1256	19.632	17.5687	19.9882	17.0934	18.1277	16.3345	19.6474	17.1257	18.6685	18.6381	19.9224	18.6302	19.5577	19.0923	17.3249	18.7386	18.3317	18.8252	21.0022	20.3435	18.8708	7.21148	19.6187	7.20747	19.6654	7.30754	19.64	7.12401	18.3698	7.53943	19.7418
	43694.8	72	18.9919	19.2851	20.0821	18.2413	18.8992	16.5663	18.8335	17.8572	18.8663	17.0242	18.3717	19.0557	18.6558	16.5285	17.5725	16.755	18.3695	17.2575	18.7238	16.204	17.0879	15.9136	19.0933	16.6744	17.6664	17.7978	18.3483	17.7681	18.9727	18.557	16.6026	18.6175	17.5167	17.5535	19.8524	20.3132	18.1879	7.33259	18.4975	7.22744	19.4887	7.39147	18.6966	7.1922	17.9664	7.59662	19.2308
	43694.9	74	18.1022	18.7257	18.8319	17.9371	17.8314	16.412	17.678	17.1142	18.285	16.8141	17.9152	18.1794	18.0384	16.0471	17.4539	15.5633	17.9663	16.5201	17.8585	15.2018	16.5232	14.8885	18.4081	15.8963	17.457	17.2773	17.674	16.5629	19.0511	18.9316	15.7187	17.9341	17.0876	17.363	19.8041	20.361	17.6402	7.39645	18.0263	7.30142	19.157	7.46497	18.1921	7.24077	16.2674	7.62715	19.2168
	43695	76	17.7349	18.0525	18.3341	17.6692	17.1454	15.9737	17.5459	16.3287	17.7596	16.4974	17.0627	17.5241	18.0849	15.1568	16.588	15.7734	17.688	16.0141	17.261	15.186	15.9838	14.4629	17.4188	15.384	16.955	16.6361	17.0964	15.9544	18.4575	18.0414	15.3385	17.1978	16.5605	16.8983	19.2729	19.4885	17.182	7.46714	17.7464	7.34411	18.2027	7.53071	17.0803	7.3491	16.2421	7.72957	19.2325
	43695.1	78	17.057	17.9207	18.2927	17.1926	16.4504	15.3763	16.735	16.0015	16.4583	15.6461	16.3024	17.2937	17.478	15.0516	15.9821	15.4299	16.6508	15.28	17.0097	14.6715	15.6941	13.9708	17.2051	15.0282	16.228	16.5278	17.0448	15.3302	17.7264	17.2463	14.6435	16.252	16.1932	16.3242	19.2664	19.1787	16.2517	7.58224	16.9872	7.44243	18.4853	7.67083	16.9354	7.46629	15.8527	7.73681	18.2216
	43695.2	80	15.9037	16.9723	17.0385	16.2922	16.1101	14.5701	16.9122	15.7273	16.3234	15.6961	15.8028	16.7102	16.6003	14.0478	15.6474	14.6122	16.4356	14.4701	16.0178	14.4392	15.0246	14.0416	16.6909	14.553	15.5804	15.7985	16.44	14.9873	17.4612	17.4864	14.2235	16.4109	15.3283	15.1883	18.7046	18.5526	15.7808	7.66622	16.3879	7.52046	17.2314	7.71901	16.8729	7.52923	15.0664	7.82972	17.7869
	43695.2	82	15.9302	16.9409	16.2074	15.6999	15.1576	14.532	15.8841	15.2716	15.6419	14.9962	15.3153	16.2445	15.9265	14.1731	14.916	13.811	15.3276	14.4161	15.3787	14.1618	14.8898	13.3075	16.2734	14.1225	15.4118	14.7323	16.2125	14.666	16.8261	16.5902	13.6418	15.741	15.0516	14.6239	18.3557	17.4615	15.1116	7.72905	15.8351	7.57626	17.0185	7.80055	15.5859	7.60376	15.2033	7.89864	18.0033
	43695.3	84	15.4196	16.6657	15.2723	15.5426	14.976	14.294	15.4682	14.5373	14.9514	14.3251	15.3012	15.4325	15.8116	14.0477	14.5523	13.7274	15.1704	13.9097	15.3951	13.2879	14.2907	13.243	15.4239	13.997	14.8138	14.5809	15.2801	14.831	16.4945	15.9357	13.0372	15.2124	14.4708	14.5359	18.3961	17.5807	15.0112	7.81045	15.3781	7.64687	16.4726	7.79371	14.9972	7.67643	14.4682	7.95001	17.7728
	43695.4	86	15.2648	16.0493	15.4159	14.7283	14.5753	13.5148	14.7906	14.1464	14.669	13.7579	14.4713	15.1304	15.1674	13.0103	14.1151	13.058	14.3058	13.4669	14.6517	12.9154	13.8061	12.6289	14.8401	13.2225	14.4577	13.9546	14.7415	14.5708	16.5151	15.5506	13.0887	14.6849	14.4296	13.9576	18.2334	17.2924	14.5398	7.87173	15.4902	7.70337	15.5127	7.87049	14.2979	7.77202	13.8778	8.09247	17.5548
	43695.5	88	14.7184	15.2931	15.0429	13.9301	13.7695	12.7967	14.3709	13.6342	14.455	13.2856	13.9304	14.8657	14.9155	12.8405	13.3206	12.8558	14.2157	13.2985	14.3882	12.6511	13.8025	12.2133	14.3429	13.1309	13.8366	13.6243	14.2753	13.7343	16.4118	15.5062	12.5084	13.8549	14.0647	13.3468	17.8823	16.6429	14.0651	7.87136	14.7437	7.78762	15.06	7.94493	14.4207	7.89502	13.5989	8.0865	17.1182
	43695.6	90	14.334	14.6943	14.1237	13.7374	13.4396	12.6265	13.6803	13.095	14.2971	13.2619	13.7757	14.4448	14.3026	12.8062	13.1409	12.6458	13.7054	13.0977	13.5546	12.2609	13.0048	11.8577	14.1372	12.4455	13.6914	13.2845	13.8884	13.1929	15.7278	14.7854	12.2941	13.6814	13.3275	12.8623	18.3306	16.19	13.5837	8.03093	14.2943	7.87789	14.9049	8.05784	13.7846	7.99132	13.2551	8.21849	17.0601
	43695.7	92	14.0233	14.5363	13.9603	13.0747	13.0413	11.9378	13.4776	12.8596	13.0295	12.6842	13.0916	13.7278	14.1739	12.6333	12.5847	12.4276	13.4086	12.4393	13.1825	11.4024	12.6562	11.5146	13.3725	12.2895	13.1459	12.5998	13.605	12.8193	15.0524	14.4575	11.9442	13.1646	13.1081	12.7417	17.5838	15.9474	13.1735	8.01804	13.8281	7.91351	15.0035	8.07687	13.5198	7.91779	12.8031	8.23865	15.9342
	43695.7	94	13.6054	13.7547	13.4936	12.4321	12.7896	12.2358	12.9445	12.7303	12.6824	12.3043	12.5128	13.272	13.8425	12.1828	12.1348	11.5403	13.1664	12.1009	12.7499	11.4098	12.6738	11.042	12.6396	11.6761	12.8165	12.5062	12.9545	12.6082	14.6247	14.4225	11.8539	12.9645	12.6067	12.286	17.138	15.8819	12.7503	7.998	13.4948	7.98006	14.2389	8.14523	12.6714	8.0322	12.3344	8.25635	15.6438
	43695.8	96	13.1105	13.185	13.2832	12.4416	12.4053	11.7077	12.3611	12.4509	12.7146	12.0381	12.2202	12.5943	13.406	12.0381	11.6957	11.6471	12.2361	11.7663	12.2747	11.1563	12.3922	10.8204	12.4566	11.6043	12.5815	12.0046	12.6414	12.3075	13.887	13.7685	11.6407	12.7028	11.9059	12.0489	17.0251	15.2164	12.2974	8.11446	12.6479	8.01702	13.8812	8.18318	12.4095	8.07124	11.8747	8.32508	15.3457
	43695.9	98	12.7656	12.6738	13.0043	12.0999	12.2825	11.2524	12.2335	11.6994	12.2099	11.5341	11.8944	12.2576	12.9107	11.9144	11.4438	11.6757	12.2203	11.3755	11.9253	10.9038	11.991	10.6332	12.1593	11.0478	12.2209	11.8512	12.3248	12.0712	13.4057	13.2683	11.4129	12.3011	11.7599	11.7775	16.3638	15.1183	12.1875	8.06804	12.5384	8.05824	13.5453	8.21119	12.0643	8.14222	11.7343	8.31545	14.8617
	43696	100	12.3708	12.264	12.6791	12.1298	11.7899	11.1225	12.0924	11.4323	12.1905	11.5864	11.4967	11.9323	12.5387	11.5156	11.1198	11.6102	11.8802	11.2594	11.7303	10.6206	11.6474	10.5578	11.7675	10.7801	11.6165	11.5327	11.9132	11.843	12.8187	12.9474	10.8981	11.8247	11.222	11.5291	16.2033	15.2961	11.725	8.10254	12.02	8.04593	12.9382	8.31645	11.7252	8.22324	11.6326	8.39242	14.6567
	43696.1	102	12.1743	12.0873	12.3634	11.5695	11.7457	10.7103	11.8054	11.3767	11.8762	11.2477	11.5264	11.5524	12.2982	11.017	10.7373	11.0551	11.5409	11.0698	11.3533	10.2942	11.5253	10.3619	11.571	10.5343	11.5817	11.2061	11.5965	11.3427	12.586	12.7175	10.831	11.3863	10.9734	11.2622	15.4889	14.6457	11.6421	8.157	11.8673	8.11418	12.5319	8.38005	11.7592	8.25633	11.0914	8.45563	14.4083
	43696.2	104	11.8311	11.8947	12.2032	11.3772	11.5485	10.6597	11.4651	10.8833	11.3511	11.0275	11.1579	11.5247	11.9851	10.9903	10.4021	10.5672	11.3487	10.5838	11.0823	10.1466	11.1653	9.73476	10.8829	10.1881	11.4289	10.8613	11.353	11.0794	12.205	12.0918	10.4517	11.3962	10.5425	10.9938	14.3393	14.3921	11.5623	8.20283	11.5895	8.1007	12.0978	8.39241	11.5974	8.29215	10.936	8.51478	13.942
	43696.2	106	11.5775	11.6156	11.8666	11.1265	11.2305	10.2658	11.1434	10.8288	11.0522	10.505	11.0301	11.1891	11.6553	10.6876	10.5225	10.6154	10.7469	10.7917	10.953	9.88093	10.9374	9.62578	10.7902	10.2186	10.9896	10.6242	11.1209	10.7904	11.7279	11.7927	10.0383	11.1312	10.7001	10.7214	14.7683	14.0314	11.4243	8.28484	11.4647	8.19069	11.7692	8.48374	11.1342	8.38632	10.817	8.55337	13.8235
	43696.3	108	11.3382	11.1953	11.6585	10.7545	10.8624	9.96482	10.7485	10.3024	10.8348	10.3726	10.5437	10.7933	11.4385	10.3406	10.1602	9.98084	10.7818	10.3458	10.5961	9.79449	10.8193	9.60202	10.9242	9.80082	10.7583	10.5179	11.0501	10.5064	11.1274	11.1168	10.0967	10.8101	10.1663	10.4363	14.552	13.9567	11.2498	8.30399	10.9438	8.30179	11.6233	8.52526	10.9511	8.44741	10.5139	8.66398	13.8083
	43696.4	110	11.1202	11.3808	11.1916	10.8562	10.5983	9.81341	10.6521	10.1801	10.5357	10.14	10.4628	10.7756	11.3919	10.298	9.8652	9.98724	10.3817	10.1177	10.3281	9.67642	10.9567	9.37434	10.3338	9.64183	10.4194	10.2651	10.4819	10.3705	10.6754	10.8687	10.0327	10.4837	9.91254	10.2665	14.2026	13.6349	10.935	8.44329	10.759	8.39337	11.017	8.60984	10.7884	8.46689	10.2974	8.71271	13.5199
	43696.5	112	10.8312	11.4579	11.1287	10.6208	10.377	9.76759	10.3843	10.0633	10.3367	10.0269	9.8344	10.354	11.052	10.0016	9.77293	9.83775	10.2044	10.055	10.2588	9.68877	10.4741	9.20118	10.0076	9.63426	10.4096	9.99069	10.4236	10.3952	10.5061	10.619	9.72467	10.6613	9.97006	9.81257	13.9995	13.7084	10.7215	8.5231	10.4954	8.42208	10.4087	8.69905	10.4332	8.51719	10.2116	8.79336	13.6034
	43696.6	114	10.851	11.2154	10.9212	10.5808	10.2407	9.72435	10.0577	9.90254	10.442	9.6437	9.72788	10.2815	11.286	10.1574	9.79136	9.82213	10.2205	9.9624	10.1873	9.35087	10.4144	9.11322	9.90203	9.29712	10.0628	9.86427	10.5455	10.0991	10.1498	10.448	9.43211	10.1992	9.77412	9.79935	13.9343	13.3723	10.7297	8.62598	10.4686	8.61168	9.89785	8.789	10.3183	8.66053	10.0942	8.96055	13.3333
	43696.7	116	10.5976	11.0331	10.5539	10.2211	10.2839	9.5887	9.96131	9.62558	10.1574	9.31659	9.61945	10.2399	10.9154	9.74782	9.61397	9.52128	9.88842	9.21279	9.99009	9.10882	10.0924	8.81804	9.54233	9.05643	9.8524	9.64561	10.2769	9.93525	9.76702	9.88382	9.45813	9.8903	9.48968	9.70747	13.3515	12.9918	10.415	8.60843	10.075	8.60637	9.75552	8.75543	10.4709	8.61573	9.74245	8.95519	13.4587
[truncated: 193 more columns]

## Sheet: Plate 2 Confluence 2
	Vessel Name: 190814_KCGS_2		C3	D3	E3	F3	G3	H3	I3	J3	K3	L3	M3	N3	C4	D4	E4	F4	G4	H4	I4	J4	K4	L4	M4	N4	C5	D5	E5	F5	G5	H5	I5	J5	K5	L5	M5	N5	C6	D6	E6	F6	G6	H6	I6	J6	K6	L6	M6
	Date Time	Elapsed	GSK1838705	GSK1838705	GW830263A	GW830263A	BI01125081	BI01125081	BI00614644	BI00614644	THZ1	THZ1	PFE-PKIS 3	PFE-PKIS 3	GSK1838705	DMSO	GW830263A	DMSO	BI01125081	DMSO	BI00614644	DMSO	THZ1	DMSO	PFE-PKIS 3	DMSO	GSK872	GSK872	TPKI-100	TPKI-100	GW280670X	GW280670X	GSK114	GSK114	GSK2219385	GSK2219385	BI00036838	BI00036838	GSK872	Torin	TPKI-100	Torin	GW280670X	Torin	GSK114	Torin	GSK2219385	Torin	BI00036838
	43691.8	0	17.4768	15.5259	18.6583	16.5818	18.9147	13.9355	23.062	16.9875	22.8578	18.0006	22.3543	14.6535	19.0071	20.4684	20.5267	23.0868	24.2809	15.3177	25.8747	24.2391	21.9275	25.2013	17.7922	22.4207	19.5887	17.0344	20.0764	17.4711	22.1972	18.9329	25.8496	18.4698	25.6489	20.7679	19.268	16.2611	18.1226	20.4707	20.4004	25.651	23.825	12.7106	23.797	26.3261	19.5409	23.0551	22.9279
	43691.9	2	18.2939	16.5626	20.0157	18.5607	20.2588	17.3933	24.6831	21.2835	24.5174	22.7681	24.4442	16.9183	20.1319	22.6485	21.9102	25.0714	26.4224	19.9083	28.2719	26.8388	24.8364	26.9175	18.0516	22.5516	22.8253	19.5938	21.7182	21.2569	23.5775	23.1126	29.0531	20.8172	28.6	21.4244	21.6156	18.2087	20.1283	21.5238	22.2355	27.6416	24.4225	15.0959	27.5831	28.4355	28.571	26.5077	23.4387
	43692	4	18.993	17.0439	21.3867	19.7499	20.9834	19.1252	25.5152	23.268	26.1333	24.2181	25.9879	17.2333	20.7805	21.8207	22.3869	25.4344	28.4865	22.5063	27.2014	27.9499	25.6693	29.1053	18.8087	23.2852	23.4575	20.1469	24.1185	22.6122	23.6005	24.1694	31.3897	22.1178	30.5869	24.2185	22.8344	18.654	20.7987	23.9577	24.0236	28.7687	25.0891	16.1825	28.7595	30.7005	30.3657	26.5795	25.4172
	43692.1	6	20.4747	19.2859	22.8707	21.4475	22.8286	21.9048	27.0549	26.1329	28.6737	25.258	25.8347	19.2358	23.1947	24.7225	24.5479	29.0753	30.1666	25.1601	30.564	30.2036	27.7101	31.5743	20.4809	25.1699	24.438	22.3213	25.985	24.9485	26.3933	25.6756	34.0687	23.7091	31.7157	25.5225	25.654	20.1799	23.3026	26.297	24.9013	28.5941	26.7254	18.353	30.5052	29.5946	32.5876	27.4402	27.0149
	43692.2	8	22.6218	20.4804	25.0458	22.8308	24.7706	23.3832	29.9968	26.5813	30.3935	28.8478	29.2582	22.4354	25.4661	27.2845	24.0875	30.8751	31.8179	30.2106	32.7242	32.3293	31.2182	32.6754	21.8228	27.6523	27.3374	24.1948	27.2018	27.2578	28.4092	28.4469	36.8665	26.5888	34.4208	27.4189	26.912	21.2779	24.3478	27.3783	25.3945	31.0077	28.7236	23.3075	34.1502	32.7468	35.1319	29.8047	30.3236
	43692.2	10	23.9595	21.8245	26.0775	25.0285	26.5872	26.947	30.8451	29.2532	31.3699	32.1677	32.5942	23.7551	25.928	29.0932	28.42	31.9575	33.5319	32.9763	35.4079	34.7836	32.8732	36.9732	23.802	28.5591	28.0199	25.8974	30.0729	27.819	30.3382	30.906	38.0459	28.8374	35.4856	28.2339	28.8044	24.3108	24.2111	27.5318	27.5114	30.3518	31.3239	25.7341	36.0795	35.3161	37.8963	28.5237	30.4953
	43692.3	12	26.9404	25.6925	27.9297	27.8241	29.1577	27.5144	33.1429	32.3442	35.446	33.8469	34.9504	26.5899	27.8542	30.711	29.3596	35.5867	37.3249	35.6525	38.9779	37.5259	34.4265	38.6209	26.4216	31.6196	28.8951	28.2542	32.5494	31.0055	33.1523	36.1125	40.3204	31.8901	36.0189	32.193	30.3756	24.9132	24.0286	28.7634	28.8388	32.7162	34.3321	29.0101	38.5852	37.37	40.2311	30.8743	33.3521
	43692.4	14	28.4834	27.2646	30.0419	30.9173	32.1415	30.2525	32.9874	35.916	36.7421	36.0917	37.0117	27.4757	29.3043	34.9262	32.1884	38.3316	39.6741	40.1142	39.5971	40.1112	37.4977	42.3323	28.2381	33.6144	31.322	30.6461	32.7176	35.6311	33.523	38.2645	41.6503	34.5366	41.6899	35.9691	33.1147	29.4609	29.1854	29.7846	32.5857	34.6924	37.7385	30.9314	39.4932	38.2758	41.0453	31.5337	35.4806
	43692.5	16	30.0232	28.9841	31.8524	36.2494	34.9737	36.4631	38.595	37.7699	41.7478	38.8339	41.151	33.0878	33.8058	38.8597	35.5812	43.7738	44.8558	45.5884	42.7302	44.3869	41.0215	45.5453	32.529	38.789	35.2708	34.5279	37.2409	41.4273	39.1927	44.2302	46.1878	38.0827	46.822	39.4906	37.1911	32.3154	32.6019	33.4017	37.3164	35.8421	42.8368	33.5747	43.4759	40.4647	46.1159	36.8062	39.7716
	43692.6	18	32.7406	33.0204	36.3314	37.3925	37.4862	38.772	37.8147	40.7837	44.6499	42.689	42.2765	35.309	34.1358	38.6925	36.388	43.8498	47.6622	48.243	45.504	47.097	43.2139	48.4113	33.925	39.466	35.7033	32.6106	40.2909	41.8356	40.7665	43.8769	49.9582	39.3698	48.9862	40.1235	39.5759	37.3934	34.8884	34.3722	37.8962	36.014	44.2236	33.8396	47.7042	41.8723	51.0442	36.829	42.7779
	43692.7	20	33.9437	36.4277	37.2151	41.5707	38.7075	41.1836	41.915	43.7252	47.02	43.9621	43.1634	36.7644	38.7478	45.5833	35.9396	48.4427	50.7623	50.0868	47.9025	48.4694	46.9537	52.0641	37.2515	44.2763	38.5772	41.7187	43.3919	46.5562	43.9571	46.9793	53.4182	42.771	52.4455	44.6526	43.7819	39.3427	35.5521	32.8671	38.0776	37.2587	49.1153	36.0167	52.0286	42.7988	55.0552	37.2972	44.6469
	43692.7	22	37.0977	40.6408	40.9928	44.1138	41.8407	45.0172	43.9933	47.2764	51.479	51.5904	46.6583	42.135	39.8871	46.5952	44.0094	51.894	51.5601	56.5887	51.3474	52.532	50.6484	53.7914	41.8978	45.8471	42.4965	45.3956	47.045	49.6	46.0616	52.5537	57.2497	48.5254	55.4773	49.8855	46.8289	44.4962	38.9197	34.0551	44.0203	36.5099	54.8346	36.2035	50.8978	42.4874	57.84	37.2518	49.9158
	43692.8	24	40.3705	42.8129	42.9808	48.5815	45.8979	51.2576	50.0091	51.1003	54.471	57.4281	49.6697	45.0861	44.386	51.2836	44.9626	56.6347	56.2114	59.7076	55.0592	58.7674	56.8588	57.9715	44.2262	46.8563	47.3735	49.5865	49.3486	55.9638	51.7954	57.7041	61.7198	50.0817	59.728	53.5438	51.6354	46.602	40.1344	33.2284	46.8026	36.709	57.2932	36.6628	58.8636	42.1787	62.702	38.0144	53.31
	43692.9	26	43.1821	46.1848	45.9513	51.8112	47.439	54.1424	50.9091	53.3162	59.8429	60.7903	58.0641	48.2712	47.3969	56.2274	49.56	60.5306	59.587	63.0055	56.9082	60.8733	59.7126	63.9147	47.5288	52.9683	48.8025	51.7322	53.6669	59.0957	53.3437	61.3319	66.8383	54.352	62.5778	57.0258	55.6613	52.2824	45.3896	34.2097	49.3272	36.8918	61.5148	37.1127	59.9999	41.1341	63.3435	38.897	56.2595
	43693	28	45.9187	51.7395	54.7133	57.099	52.0509	59.4633	55.1203	61.7755	59.7145	63.3248	59.7325	53.8651	51.6783	59.5766	55.7412	63.466	63.5529	64.8757	60.0708	64.8029	65.4374	67.704	54.1026	59.5853	55.0806	56.6493	57.8004	62.2129	57.6304	65.2993	70.6337	59.4258	67.2709	61.0251	59.6886	56.0262	51.3065	34.5671	54.2222	36.6953	64.0302	36.9658	64.4422	42.0901	70.1743	37.9886	62.0281
	43693.1	30	49.257	57.3284	59.5706	63.9047	58.4123	63.5101	62.5763	63.1279	65.6775	71.6649	62.5765	58.8505	53.6844	63.9818	54.157	69.45	67.8043	71.4541	64.3527	71.7579	71.2451	70.9389	59.7734	65.9173	56.981	62.981	63.2897	68.5944	62.9789	71.1359	73.638	64.6876	72.5003	67.7092	63.0823	61.6831	55.3565	34.4154	58.051	37.5377	69.5045	37.8153	69.5567	41.1823	74.1766	39.1519	66.6049
	43693.2	32	54.7905	57.7338	64.5356	66.2515	56.4776	71.3011	62.039	67.8849	70.5087	74.3017	70.5097	63.7867	59.7417	71.1372	63.349	70.4312	71.7785	74.9853	67.6926	71.7006	73.5752	76.1162	61.593	69.8124	64.0545	68.9038	66.0609	73.622	69.9739	74.3737	77.9722	69.3125	79.6047	70.6171	69.3725	66.5597	59.0164	35.6788	63.889	36.9423	75.3267	37.9291	71.742	40.7856	75.5989	39.4181	71.9918
	43693.2	34	60.7692	67.6629	65.7789	72.3819	64.7476	74.4597	68.7362	74.8112	72.9282	77.288	72.207	63.063	65.912	74.5841	68.5006	77.7794	76.0365	79.1215	74.2508	77.8179	78.0595	82.5548	71.9227	76.3278	67.9376	74.7392	69.3305	77.6198	73.5087	77.0992	80.7164	73.662	81.8623	77.5465	74.03	73.1106	59.8338	37.514	70.0601	37.8594	79.7097	38.2774	75.5216	41.9755	81.4912	40.9379	74.842
	43693.3	36	66.5773	72.0328	69.9152	77.2239	72.5403	80.956	74.7095	75.0688	80.4992	84.9809	78.5616	74.4046	69.411	78.0071	72.3427	81.7772	80.1572	82.8529	75.0441	79.9507	82.75	85.6489	71.3783	77.8713	74.2295	77.0298	74.5651	81.5542	78.155	80.8641	85.0452	78.2604	85.3945	80.437	79.835	77.5248	67.6397	37.2806	72.3401	38.3111	80.0382	40.4254	79.4193	41.904	85.4167	41.4976	77.9038
	43693.4	38	69.5579	75.8554	73.1465	81.149	76.5994	84.3663	76.6342	81.9327	83.4028	88.2571	83.7241	77.0459	76.3234	81.7647	77.7735	86.7581	85.3648	86.7546	82.3564	84.1555	86.5058	91.1526	79.3302	84.9593	79.3466	85.0875	79.3645	83.6819	83.533	85.8584	88.8172	82.3782	90.2777	84.0233	83.1752	82.214	74.8915	37.7412	78.1761	37.6378	85.2713	40.6048	84.945	41.2872	89.7256	41.4265	82.953
	43693.5	40	76.4877	78.0404	81.5704	85.9657	80.0797	86.3312	77.02	80.928	87.5475	90.9705	87.3309	81.0764	79.4487	86.4262	82.6488	90.0679	86.4216	88.8327	84.005	87.2135	89.2169	93.3202	83.5042	87.8314	82.864	88.3977	84.0291	87.8962	81.0896	87.1643	90.029	87.5202	91.9917	87.5957	86.1475	84.3574	77.2366	36.2521	82.2804	37.3223	88.4402	39.0801	88.9283	42.2892	90.9193	41.0269	85.3724
	43693.6	42	82.3882	80.8104	84.7392	88.6747	84.6783	90.8906	82.7329	85.1413	90.6414	93.8386	90.5991	89.1815	83.1093	89.5525	84.6787	93.8385	89.4554	92.0334	86.4904	90.9446	90.4923	94.9692	88.226	90.8972	88.1413	89.7443	87.5812	93.1655	86.6031	89.6861	90.891	90.3758	94.2517	92.2026	88.9698	90.5086	82.5284	37.8865	86.1864	38.0784	89.3037	39.718	91.8346	41.2444	92.6861	41.0994	89.3972
	43693.7	44	85.0723	88.4653	89.7648	90.3019	87.2989	92.5783	85.0052	89.919	94.0239	94.558	91.6796	91.953	88.6408	92.0932	85.1001	94.2858	92.1047	93.4351	88.1235	93.5365	92.7484	96.9076	91.3501	93.6011	89.5912	92.5059	88.8162	93.6794	89.5051	92.6626	93.4956	92.3934	96.2833	93.4348	90.9526	92.173	85.4728	38.2459	89.1059	37.9824	92.2131	40.2317	92.7806	42.52	94.2025	42.5438	90.1949
	43693.7	46	88.8902	90.9003	92.5866	92.1742	89.8759	94.5499	87.8372	92.3531	94.5296	96.9186	94.1647	90.4296	90.6359	93.4523	91.4498	96.0635	93.7751	95.4589	90.7724	94.2638	94.2541	97.7899	94.0048	94.869	92.9094	94.9617	91.9595	95.2614	92.0756	93.6426	95.2108	95.3311	97.1714	94.853	92.5455	94.322	89.7638	38.1536	92.1775	37.7957	93.8261	40.5964	94.7265	41.9108	95.9162	43.7975	93.4538
	43693.8	48	88.8875	92.1673	94.5018	94.7385	93.7879	96.0529	90.6624	93.1286	96.3784	97.8274	95.7717	94.9185	92.7947	95.7985	92.3349	96.7306	95.4237	95.6178	92.7517	95.4531	96.0414	98.4922	95.1523	96.3876	94.8839	97.0781	94.0589	96.3975	94.322	95.1311	97.004	97.1863	97.9717	95.5439	93.7035	95.0768	92.5709	39.0384	93.452	39.1018	95.358	42.0721	96.3618	42.6738	97.1777	45.248	95.2008
	43693.9	50	93.7122	94.5107	96.1148	96.55	94.8996	96.972	91.7646	92.3038	96.6612	98.0789	96.4893	94.9703	94.1996	97.0619	95.136	98.1644	96.1052	96.8966	93.9468	96.9439	96.7743	98.9797	96.1465	97.5663	96.0994	97.869	95.7684	97.3037	94.508	95.7277	97.1353	97.5594	98.3949	96.9525	94.6992	96.4528	94.0635	37.6022	95.7883	38.5431	95.2242	39.8406	96.699	43.297	97.3747	43.8583	95.61
	43694	52	94.7787	95.3324	97.4506	96.6883	95.8113	96.9628	92.9147	95.7626	97.9841	98.5429	97.8842	96.8147	95.7163	97.4927	95.7837	98.7053	97.4303	96.9015	94.4316	97.2414	97.606	99.1834	96.4384	98.0103	96.6157	98.476	96.1033	98.1544	97.2825	96.0384	97.7663	97.9825	98.788	97.7649	96.3055	96.7079	96.0357	36.636	96.7363	39.3166	96.7099	40.6119	96.8283	43.272	98.344	43.0362	95.9766
	43694.1	54	95.7217	96.906	97.6299	97.7972	96.7957	98.0601	94.7754	97.0792	98.2222	99.0005	98.5927	98.2306	96.614	98.062	97.3729	98.9413	98.0082	98.2814	95.9012	97.6883	98.21	99.3734	98.2359	98.7189	97.3831	98.8739	97.6694	98.5366	98.1094	96.8773	98.5311	98.4397	99.3339	98.2112	96.4494	97.6887	95.9774	39.4779	97.1047	39.669	97.7321	39.8588	97.7184	44.4844	98.693	44.2044	96.2301
	43694.2	56	97.1282	97.3527	98.0119	98.2198	97.3038	98.3842	95.7491	96.8117	98.5249	99.4155	98.6258	98.7666	98.3433	98.5466	98.4463	99.1796	98.1919	98.6376	96.1947	98.165	98.6187	99.5496	98.5013	99.0753	98.4761	99.1991	98.2779	99.0329	98.5059	98.4867	98.6061	99.0686	99.2459	98.6322	96.7238	98.2493	97.4378	38.2885	98.0005	39.2651	97.7047	41.3439	98.2577	44.1137	98.8188	44.6882	96.8382
	43694.2	58	98.6194	98.4198	98.6417	98.9337	98.109	99.234	96.7461	97.8264	98.9653	99.5961	98.9844	98.9113	98.775	98.8687	98.606	99.3356	98.7553	99.0761	97.4887	98.7969	98.9653	99.679	99.0941	99.4666	98.0782	99.2612	98.2351	99.2437	99.0588	98.3891	99.04	99.2094	99.5036	99.0284	97.0703	98.8565	98.1259	38.8164	98.5095	40.2657	98.3197	41.0713	98.7499	45.1361	99.3314	46.0901	97.6902
	43694.3	60	98.6686	98.9039	98.9824	99.2386	98.3508	99.3423	96.9765	98.6072	98.7616	99.5562	99.1905	99.4612	98.9365	98.7968	98.8793	99.4025	99.0626	99.2394	98.1968	98.7757	99.1496	99.7362	99.18	99.6137	99.0048	99.5856	98.7867	99.4958	98.9487	98.1837	99.2152	99.428	99.6219	99.5066	97.4507	98.5894	98.3026	41.1262	99.1543	41.6832	98.5125	42.5025	99.1946	45.26	99.5898	46.22	97.8355
	43694.4	62	98.9365	98.7905	99.4352	99.2824	98.9542	99.6222	98.6032	99.1649	99.4098	99.803	99.2935	99.5162	99.0039	99.2316	99.1772	99.6536	99.1795	99.5745	98.6986	99.3926	99.3976	99.7927	99.4224	99.5987	99.3201	99.652	99.1013	99.5866	99.2925	98.9232	99.4784	99.4588	99.6679	99.6468	97.674	99.0889	98.6924	40.6644	99.3925	41.8423	99.2944	43.8968	99.4591	45.6747	99.4646	47.103	98.3074
	43694.5	64	99.3897	99.3611	99.5144	99.4727	99.1403	99.601	98.9431	99.183	99.4574	99.8387	99.5246	99.5915	99.3334	98.9327	99.2008	99.5596	99.1765	99.6221	98.9699	99.5034	99.5127	99.8691	99.6079	99.7488	99.4127	99.7899	99.5144	99.6638	99.3022	99.4025	99.4438	99.3229	99.7874	99.7739	97.6498	99.099	98.8547	42.3692	99.4885	42.5363	99.3523	44.0866	99.6301	46.3895	99.6415	47.7304	98.6133
	43694.6	66	99.4234	99.4842	99.6967	99.5805	99.3374	99.7219	98.9787	99.1727	99.349	99.8627	99.5122	99.6981	99.4958	99.3174	99.5396	99.7463	99.4963	99.8403	99.0525	99.5776	99.3594	99.9435	99.752	99.8149	99.406	99.8263	99.6393	99.8037	99.5255	99.3646	99.4954	99.6183	99.7839	99.9077	98.1943	99.3038	99.0032	40.7225	99.4945	44.0975	99.509	45.0303	99.6925	47.0234	99.6924	48.2013	98.3278
	43694.7	68	99.6945	99.5735	99.6597	99.5511	99.5857	99.8183	99.3947	99.515	99.6049	99.8847	99.6089	99.8354	99.438	99.2039	99.5891	99.8474	99.5745	99.8832	99.6559	99.6822	99.4343	99.9439	99.8233	99.8416	99.6709	99.8726	99.746	99.8014	99.7913	99.4686	99.5971	99.7262	99.8749	99.8528	98.4738	99.1322	99.345	44.3937	99.5689	44.1616	99.5549	43.8673	99.7638	46.8012	99.7968	50.2445	98.5653
	43694.7	70	99.5343	99.731	99.782	99.627	99.7076	99.8796	99.5939	99.612	99.5061	99.8633	99.7717	99.8465	99.6165	99.5237	99.6644	99.8848	99.5364	99.9567	99.5793	99.6882	99.5065	99.9587	99.8043	99.8663	99.5642	99.8399	99.7932	99.8186	99.8676	99.6745	99.6915	99.8017	99.8852	99.9059	98.2786	99.3779	99.3387	41.5054	99.5491	45.1618	99.5889	45.751	99.8243	48.5627	99.805	50.1699	98.6269
	43694.8	72	99.6832	99.8133	99.7458	99.7203	99.7237	99.8445	99.7392	99.7331	99.427	99.8713	99.8139	99.9105	99.6298	99.565	99.6967	99.8239	99.6176	99.9073	99.6108	99.8611	99.5292	99.9574	99.8654	99.9185	99.3978	99.884	99.8668	99.918	99.8385	99.4714	99.7239	99.8982	99.8983	99.9427	98.258	99.2396	99.3724	42.0803	99.5666	45.1799	99.5519	47.1531	99.8535	47.9988	99.8887	51.75	98.4231
	43694.9	74	99.5358	99.8531	99.8225	99.83	99.7811	99.8754	99.7497	99.7029	99.6885	99.9217	99.8394	99.9109	99.797	99.556	99.766	99.8711	99.6786	99.8967	99.6143	99.8861	99.5421	99.979	99.8523	99.9162	99.6311	99.8647	99.8162	99.9695	99.8571	99.7046	99.7931	99.8851	99.8796	99.9509	98.4341	99.4471	99.2554	41.9782	99.6312	47.1018	99.5283	47.8449	99.8651	48.5852	99.8539	52.1357	98.746
	43695	76	99.4592	99.8319	99.9183	99.873	99.8797	99.9493	99.8077	99.7986	99.5606	99.9547	99.9072	99.9531	99.6874	99.6389	99.7697	99.8442	99.6387	99.9235	99.6111	99.887	99.6257	99.9889	99.9659	99.9374	99.6557	99.896	99.8974	99.9805	99.9088	99.8157	99.8353	99.9049	99.8918	99.9273	98.7494	99.5338	99.2075	43.9608	99.7432	46.8041	99.6485	48.253	99.8435	51.0153	99.8814	50.5059	98.585
	43695.1	78	99.5632	99.9312	99.8465	99.8898	99.8717	99.9463	99.7966	99.7847	99.5319	99.9658	99.9393	99.9686	99.7959	99.7216	99.7808	99.9069	99.662	99.877	99.6956	99.8689	99.7776	99.986	99.9174	99.9613	99.5294	99.9201	99.954	99.9784	99.8987	99.8325	99.7389	99.9512	99.8683	99.9084	98.5717	99.6417	99.4298	43.7241	99.8337	47.6721	99.6235	48.3944	99.8926	51.9781	99.893	52.2366	98.6924
	43695.2	80	99.7685	99.9134	99.7962	99.9045	99.9484	99.9651	99.901	99.7453	99.5336	99.9701	99.9053	99.94	99.9057	99.7058	99.7459	99.9035	99.6958	99.9227	99.7085	99.8732	99.792	99.9764	99.9171	99.9587	99.684	99.9495	99.8475	99.9538	99.8738	99.6719	99.7716	99.9458	99.8456	99.9167	98.9093	99.6592	99.459	44.5292	99.8898	49.6461	99.7385	49.2378	99.8854	52.8737	99.92	53.8631	98.6563
	43695.2	82	99.7548	99.8718	99.7884	99.8996	99.9122	99.9719	99.8524	99.8253	99.6954	99.9592	99.9411	99.9726	99.9303	99.7139	99.7753	99.9104	99.6975	99.9309	99.8	99.8174	99.8794	99.978	99.9274	99.9574	99.5312	99.9184	99.9151	99.9824	99.8783	99.8705	99.781	99.9417	99.9061	99.9723	98.8672	99.7213	99.4593	45.1213	99.8771	49.6308	99.85	49.6223	99.9184	53.9575	99.9341	54.1107	98.8777
	43695.3	84	99.6167	99.9325	99.8265	99.9234	99.9439	99.9646	99.8902	99.8845	99.6046	99.9688	99.909	99.9792	99.8962	99.7611	99.7903	99.9525	99.7199	99.9594	99.8016	99.8941	99.8662	99.9942	99.8699	99.9553	99.6445	99.9374	99.9247	99.966	99.9092	99.8429	99.7751	99.9	99.9233	99.9649	98.9666	99.765	99.3872	46.4203	99.8761	49.5955	99.8061	50.7419	99.8898	54.3521	99.9527	53.919	98.952
	43695.4	86	99.654	99.9605	99.8717	99.8939	99.9321	99.9878	99.8814	99.9355	99.6835	99.9719	99.9395	99.9852	99.8631	99.7983	99.8325	99.9594	99.7725	99.9614	99.8478	99.9244	99.9398	99.979	99.7857	99.9847	99.7591	99.9647	99.9406	99.9612	99.9372	99.8799	99.7295	99.8916	99.8583	99.9523	98.999	99.7662	99.428	48.5705	99.8937	49.5861	99.8579	51.7623	99.8975	55.0173	99.9505	55.2056	99.1487
	43695.5	88	99.7819	99.9774	99.8501	99.9467	99.9492	99.9815	99.943	99.9226	99.7613	99.9739	99.9708	99.9806	99.8834	99.8851	99.8395	99.9689	99.7447	99.963	99.8968	99.901	99.9514	99.9604	99.8004	99.9872	99.7535	99.8975	99.9409	99.9374	99.9117	99.8737	99.7235	99.9223	99.841	99.9695	98.9622	99.799	99.4857	49.0023	99.8601	50.2082	99.8566	53.5705	99.8773	54.5978	99.9655	55.9699	99.2964
	43695.6	90	99.6869	99.9553	99.8513	99.9579	99.949	99.9884	99.9477	99.9018	99.719	99.9458	99.962	99.965	99.9486	99.9072	99.8229	99.938	99.7698	99.9644	99.892	99.894	99.9459	99.8989	99.9118	99.9807	99.7968	99.8761	99.9648	99.9556	99.9203	99.8668	99.7143	99.8882	99.842	99.9831	99.0637	99.733	99.5049	49.4773	99.8748	51.4423	99.8984	53.786	99.9095	56.4132	99.9613	56.3546	99.2157
	43695.7	92	99.7146	99.9767	99.8752	99.9413	99.9624	99.9811	99.9758	99.8943	99.7539	99.9709	99.9655	99.9804	99.9047	99.8847	99.8246	99.9628	99.7868	99.9514	99.8934	99.8768	99.9196	99.8935	99.9475	99.9739	99.8679	99.9233	99.9248	99.9239	99.9368	99.8105	99.7638	99.9415	99.8318	99.9846	99.0496	99.7637	99.6102	48.4269	99.8909	53.1277	99.8735	54.328	99.9109	57.2582	99.9897	57.5095	99.37
	43695.7	94	99.5963	99.951	99.8739	99.8828	99.9141	99.957	99.9587	99.9281	99.8162	99.9641	99.9826	99.9767	99.8961	99.8862	99.8201	99.9482	99.78	99.9644	99.9096	99.8868	99.9223	99.8831	99.9556	99.9769	99.7207	99.8556	99.9548	99.9635	99.8487	99.907	99.768	99.9361	99.8512	99.9842	99.0798	99.7781	99.5436	51.1184	99.8555	53.918	99.839	55.4236	99.9001	59.4039	99.9731	58.7221	99.2605
	43695.8	96	99.5852	99.9392	99.9155	99.9391	99.924	99.9753	99.9406	99.9502	99.8708	99.985	99.9507	99.9817	99.9669	99.8136	99.8439	99.9724	99.8095	99.9645	99.8425	99.8853	99.9516	99.9065	99.9203	99.9706	99.76	99.9077	99.8925	99.9882	99.7466	99.8154	99.7708	99.9693	99.8511	99.9854	99.1357	99.7755	99.5012	51.0169	99.8328	53.6831	99.8193	56.0081	99.9088	58.2287	99.9819	58.315	99.4576
	43695.9	98	99.629	99.9563	99.9519	99.9267	99.937	99.9663	99.8989	99.9312	99.7751	99.9912	99.9556	99.9752	99.8881	99.8258	99.9145	99.9686	99.8459	99.9785	99.8686	99.9209	99.9439	99.8889	99.9196	99.9841	99.8196	99.9067	99.9639	99.9963	99.853	99.9047	99.7442	99.9566	99.8778	99.9771	99.15	99.8326	99.6536	52.2026	99.8706	55.3872	99.6544	57.4865	99.8998	61.2626	99.9716	58.6793	99.3197
	43696	100	99.7262	99.9745	99.9505	99.918	99.9189	99.9824	99.9456	99.911	99.8802	99.9833	99.9609	99.9671	99.9628	99.8562	99.9458	99.9628	99.8478	99.9721	99.9171	99.9066	99.8999	99.916	99.9048	99.9721	99.8883	99.8819	99.9192	99.9878	99.8635	99.9248	99.7657	99.942	99.8142	99.9714	99.0935	99.8792	99.6161	50.6203	99.8726	55.137	99.8025	59.0477	99.8817	61.0361	99.984	60.1245	99.3789
	43696.1	102	99.7393	99.968	99.9607	99.9643	99.9689	99.9504	99.9148	99.9285	99.9426	99.9792	99.961	99.9689	99.9532	99.9295	99.8929	99.935	99.8668	99.9861	99.8816	99.8778	99.9281	99.9198	99.9041	99.9742	99.8584	99.9379	99.9334	99.9879	99.9279	99.9199	99.7223	99.9562	99.8778	99.9699	99.278	99.8394	99.6367	52.7499	99.941	56.5748	99.8842	60.2549	99.8788	62.1786	99.9779	59.4529	99.4145
	43696.2	104	99.6699	99.9699	99.9541	99.9416	99.9465	99.9692	99.9305	99.9598	99.8905	99.9861	99.9529	99.9736	99.9663	99.9454	99.9152	99.9757	99.8901	99.9837	99.9184	99.8713	99.9303	99.9182	99.8563	99.9717	99.8466	99.8252	99.948	99.9895	99.8892	99.9376	99.7693	99.9628	99.9	99.9697	99.1703	99.8331	99.7305	50.7256	99.8974	57.0545	99.8625	61.0849	99.8999	63.1994	99.9652	61.348	99.3848
	43696.2	106	99.7503	99.96	99.9387	99.9344	99.9134	99.9709	99.9305	99.9624	99.878	99.9839	99.961	99.9687	99.9826	99.9121	99.8907	99.979	99.8546	99.9755	99.9564	99.8195	99.9418	99.9017	99.9403	99.9755	99.834	99.7799	99.9749	99.9748	99.9044	99.8863	99.7199	99.9488	99.8572	99.9678	99.1105	99.8396	99.8153	53.3334	99.9404	58.7087	99.8327	62.323	99.8948	63.5196	99.9699	61.5649	99.3626
	43696.3	108	99.6649	99.9643	99.9415	99.9694	99.9103	99.9749	99.8836	99.9628	99.907	99.9876	99.9714	99.9655	99.9935	99.8838	99.97	99.9882	99.8542	99.9836	99.9292	99.7845	99.9441	99.9461	99.9595	99.9786	99.8	99.8102	99.9588	99.9697	99.8436	99.9413	99.6693	99.9719	99.8419	99.9796	99.1956	99.8603	99.8313	54.465	99.8345	60.783	99.7029	62.9346	99.9023	64.2484	99.9803	63.2308	99.3917
	43696.4	110	99.6956	99.9453	99.9607	99.9464	99.9593	99.9716	99.946	99.9866	99.9172	99.9838	99.9681	99.9689	99.9726	99.9051	99.9693	99.9699	99.8809	99.9656	99.9618	99.7083	99.9209	99.918	99.9812	99.9767	99.8853	99.8898	99.9412	99.9776	99.8368	99.9243	99.6162	99.9704	99.863	99.9648	99.1918	99.8304	99.8627	55.4887	99.9422	62.1846	99.7847	62.8551	99.9447	65.0304	99.9861	63.7027	99.3961
	43696.5	112	99.7625	99.9674	99.9372	99.9491	99.9694	99.9885	99.9587	99.9889	99.9026	99.9917	99.9384	99.9565	99.9839	99.8945	99.9644	99.9749	99.8203	99.9868	99.944	99.7987	99.929	99.9605	99.965	99.9685	99.9141	99.8408	99.9687	99.965	99.8567	99.9689	99.7392	99.9468	99.8441	99.9804	99.1787	99.7822	99.9049	56.2985	99.9513	62.3311	99.8122	63.6741	99.9395	66.6479	99.9835	64.4468	99.4498
	43696.6	114	99.7328	99.9562	99.886	99.9565	99.9601	99.9895	99.9706	99.9764	99.9151	99.9603	99.956	99.9675	99.9822	99.9395	99.966	99.985	99.8821	99.9568	99.9279	99.7802	99.888	99.931	99.9773	99.9654	99.8182	99.9153	99.932	99.9787	99.6906	99.8659	99.752	99.9126	99.8641	99.9932	99.2629	99.8319	99.9352	59.4008	99.8885	64.2874	99.9055	61.6785	99.9088	66.9397	99.9728	65.1568	99.4438
	43696.7	116	99.7317	99.957	99.9617	99.9654	99.9588	99.9831	99.9426	99.9732	99.8743	99.9606	99.9633	99.9635	99.9809	99.907	99.9697	99.9848	99.8515	99.9896	99.8525	99.765	99.9255	99.9118	99.9168	99.9708	99.8808	99.8968	99.9451	99.9527	99.8468	99.9557	99.7289	99.9476	99.8618	99.9832	99.3361	99.764	99.9294	58.5846	99.9632	63.0891	99.6871	64.2703	99.9206	67.1016	99.9664	64.4522	99.3938
[truncated: 193 more columns]

[truncated: 10 more sheets: Platemap_3, Plate 3 Ratio Green_Red 1, Plate 3 Confluence 1,  Plate 3 Ratio Green_Red 2, Plate 3 Confluence 2, Platemap_4, Plate 4 Ratio Green_Red 1, Plate 4 Confluence 1,  Plate 4 Ratio Green_Red 2, Plate 4 Confluence 2]
