# Supplementary material for: The Kinase Chemogenomic Set (KCGS): An Open Science Resource for Kinase Vulnerability Identification
Source: Int J Mol Sci. 2021 Jan 8;22(2):566. doi: 10.3390/ijms22020566 (PMC7826789; doi:10.3390/ijms22020566)
Supplement: Supplementary file 1 [file ijms-22-00566-s001.zip › SI Table 8 PKIS DiscoverX screening data.xlsx]

## Sheet: Sheet1
Inhibitor	# kinases >90 PoC	total kinases screened	conc (nM)	S10 (1000nM) score
GR269666A	4	403	1000	0.01
GSK1392956A	22	403	1000	0.055
GSK200398A	3	403	1000	0.007
GSK2219385	4	403	1000	0.01
GSK237701A	21	403	1000	0.052
GSK270822A	6	403	1000	0.015
GSK299115A	4	403	1000	0.01
GSK579289A	11	403	1000	0.027
GSK949675	14	403	1000	0.035
GW276655	10	403	1000	0.025
GW280670X	0	403	1000	0
GW282449A	7	403	1000	0.017
GW282974X	4	403	1000	0.01
GW296115X	28	403	1000	0.069
GW300657X	11	403	1000	0.027
GW300660X	9	403	1000	0.022
GW335962X	6	403	1000	0.015
GW406108X	21	403	1000	0.052
GW416981X	20	403	1000	0.05
GW435821X	8	403	1000	0.02
GW442130X	1	403	1000	0.002
GW513184X	11	403	1000	0.027
GW572399X	4	403	1000	0.01
GW576924A	2	403	1000	0.005
GW578748X	24	403	1000	0.06
GW580509X	10	403	1000	0.025
GW621970X	12	403	1000	0.03
GW632580X	4	403	1000	0.01
GW683134A	31	403	1000	0.077
GW693917A	31	403	1000	0.077
GW709042A	17	403	1000	0.042
GW770249X	42	403	1000	0.104
GW784752X	13	403	1000	0.032
GW810372X	12	403	1000	0.03
GW814408X	25	403	1000	0.062
GW830263A	54	403	1000	0.134
GW830900A	17	403	1000	0.042
SB-242719	8	403	1000	0.02
SB-633825	6	403	1000	0.015
SB-725317	18	403	1000	0.045

## Sheet: Sheet2
Compound Name	DiscoveRx Gene Symbol	Entrez Gene Symbol	Percent Control	Compound Concentration (nM)
GR269666A	AAK1	AAK1	100	1000
GR269666A	ABL1(E255K)-phosphorylated	ABL1	100	1000
GR269666A	ABL1(F317I)-nonphosphorylated	ABL1	100	1000
GR269666A	ABL1(F317I)-phosphorylated	ABL1	88	1000
GR269666A	ABL1(F317L)-nonphosphorylated	ABL1	100	1000
GR269666A	ABL1(F317L)-phosphorylated	ABL1	92	1000
GR269666A	ABL1(H396P)-nonphosphorylated	ABL1	86	1000
GR269666A	ABL1(H396P)-phosphorylated	ABL1	100	1000
GR269666A	ABL1(M351T)-phosphorylated	ABL1	100	1000
GR269666A	ABL1(Q252H)-nonphosphorylated	ABL1	98	1000
GR269666A	ABL1(Q252H)-phosphorylated	ABL1	100	1000
GR269666A	ABL1(T315I)-nonphosphorylated	ABL1	100	1000
GR269666A	ABL1(T315I)-phosphorylated	ABL1	100	1000
GR269666A	ABL1(Y253F)-phosphorylated	ABL1	100	1000
GR269666A	ABL1-nonphosphorylated	ABL1	96	1000
GR269666A	ABL1-phosphorylated	ABL1	100	1000
GR269666A	ABL2	ABL2	100	1000
GR269666A	ACVR1	ACVR1	100	1000
GR269666A	ACVR1B	ACVR1B	100	1000
GR269666A	ACVR2A	ACVR2A	100	1000
GR269666A	ACVR2B	ACVR2B	100	1000
GR269666A	ACVRL1	ACVRL1	89	1000
GR269666A	ADCK3	CABC1	100	1000
GR269666A	ADCK4	ADCK4	100	1000
GR269666A	AKT1	AKT1	93	1000
GR269666A	AKT2	AKT2	100	1000
GR269666A	AKT3	AKT3	100	1000
GR269666A	ALK	ALK	99	1000
GR269666A	ALK(C1156Y)	ALK	95	1000
GR269666A	ALK(L1196M)	ALK	100	1000
GR269666A	AMPK-alpha1	PRKAA1	100	1000
GR269666A	AMPK-alpha2	PRKAA2	100	1000
GR269666A	ANKK1	ANKK1	94	1000
GR269666A	ARK5	NUAK1	100	1000
GR269666A	ASK1	MAP3K5	100	1000
GR269666A	ASK2	MAP3K6	77	1000
GR269666A	AURKA	AURKA	100	1000
GR269666A	AURKB	AURKB	100	1000
GR269666A	AURKC	AURKC	100	1000
GR269666A	AXL	AXL	100	1000
GR269666A	BIKE	BMP2K	100	1000
GR269666A	BLK	BLK	100	1000
GR269666A	BMPR1A	BMPR1A	100	1000
GR269666A	BMPR1B	BMPR1B	100	1000
GR269666A	BMPR2	BMPR2	100	1000
GR269666A	BMX	BMX	100	1000
GR269666A	BRAF	BRAF	100	1000
GR269666A	BRAF(V600E)	BRAF	88	1000
GR269666A	BRK	PTK6	100	1000
GR269666A	BRSK1	BRSK1	100	1000
GR269666A	BRSK2	BRSK2	91	1000
GR269666A	BTK	BTK	100	1000
GR269666A	BUB1	BUB1	100	1000
GR269666A	CAMK1	CAMK1	90	1000
GR269666A	CAMK1B	PNCK	89	1000
GR269666A	CAMK1D	CAMK1D	100	1000
GR269666A	CAMK1G	CAMK1G	100	1000
GR269666A	CAMK2A	CAMK2A	93	1000
GR269666A	CAMK2B	CAMK2B	99	1000
GR269666A	CAMK2D	CAMK2D	100	1000
GR269666A	CAMK2G	CAMK2G	100	1000
GR269666A	CAMK4	CAMK4	100	1000
GR269666A	CAMKK1	CAMKK1	100	1000
GR269666A	CAMKK2	CAMKK2	100	1000
GR269666A	CASK	CASK	100	1000
GR269666A	CDC2L1	CDK11B	100	1000
GR269666A	CDC2L2	CDC2L2	100	1000
GR269666A	CDC2L5	CDK13	100	1000
GR269666A	CDK11	CDK19	100	1000
GR269666A	CDK2	CDK2	100	1000
GR269666A	CDK3	CDK3	100	1000
GR269666A	CDK4	CDK4	93	1000
GR269666A	CDK4-cyclinD1	CDK4	93	1000
GR269666A	CDK4-cyclinD3	CDK4	100	1000
GR269666A	CDK5	CDK5	100	1000
GR269666A	CDK7	CDK7	100	1000
GR269666A	CDK8	CDK8	88	1000
GR269666A	CDK9	CDK9	100	1000
GR269666A	CDKL1	CDKL1	100	1000
GR269666A	CDKL2	CDKL2	100	1000
GR269666A	CDKL3	CDKL3	100	1000
GR269666A	CDKL5	CDKL5	59	1000
GR269666A	CHEK1	CHEK1	100	1000
GR269666A	CHEK2	CHEK2	94	1000
GR269666A	CIT	CIT	100	1000
GR269666A	CLK1	CLK1	91	1000
GR269666A	CLK2	CLK2	93	1000
GR269666A	CLK3	CLK3	100	1000
GR269666A	CLK4	CLK4	100	1000
GR269666A	CSF1R	CSF1R	100	1000
GR269666A	CSF1R-autoinhibited	CSF1R	100	1000
GR269666A	CSK	CSK	22	1000
GR269666A	CSNK1A1	CSNK1A1	100	1000
GR269666A	CSNK1A1L	CSNK1A1L	100	1000
GR269666A	CSNK1D	CSNK1D	100	1000
GR269666A	CSNK1E	CSNK1E	93	1000
GR269666A	CSNK1G1	CSNK1G1	100	1000
GR269666A	CSNK1G2	CSNK1G2	100	1000
GR269666A	CSNK1G3	CSNK1G3	100	1000
GR269666A	CSNK2A1	CSNK2A1	82	1000
GR269666A	CSNK2A2	CSNK2A2	100	1000
GR269666A	CTK	MATK	100	1000
GR269666A	DAPK1	DAPK1	100	1000
GR269666A	DAPK2	DAPK2	99	1000
GR269666A	DAPK3	DAPK3	96	1000
GR269666A	DCAMKL1	DCLK1	90	1000
GR269666A	DCAMKL2	DCLK2	100	1000
GR269666A	DCAMKL3	DCLK3	100	1000
GR269666A	DDR1	DDR1	100	1000
GR269666A	DDR2	DDR2	100	1000
GR269666A	DLK	MAP3K12	83	1000
GR269666A	DMPK	DMPK	100	1000
GR269666A	DMPK2	CDC42BPG	100	1000
GR269666A	DRAK1	STK17A	68	1000
GR269666A	DRAK2	STK17B	100	1000
GR269666A	DYRK1A	DYRK1A	100	1000
GR269666A	DYRK1B	DYRK1B	100	1000
GR269666A	DYRK2	DYRK2	73	1000
GR269666A	EGFR	EGFR	5	1000
GR269666A	EGFR(E746-A750del)	EGFR	70	1000
GR269666A	EGFR(G719C)	EGFR	0	1000
GR269666A	EGFR(G719S)	EGFR	0.6	1000
GR269666A	EGFR(L747-E749del, A750P)	EGFR	41	1000
GR269666A	EGFR(L747-S752del, P753S)	EGFR	70	1000
GR269666A	EGFR(L747-T751del,Sins)	EGFR	37	1000
GR269666A	EGFR(L858R)	EGFR	36	1000
GR269666A	EGFR(L858R,T790M)	EGFR	100	1000
GR269666A	EGFR(L861Q)	EGFR	9.8	1000
GR269666A	EGFR(S752-I759del)	EGFR	71	1000
GR269666A	EGFR(T790M)	EGFR	100	1000
GR269666A	EIF2AK1	EIF2AK1	100	1000
GR269666A	EPHA1	EPHA1	100	1000
GR269666A	EPHA2	EPHA2	100	1000
GR269666A	EPHA3	EPHA3	100	1000
GR269666A	EPHA4	EPHA4	100	1000
GR269666A	EPHA5	EPHA5	100	1000
GR269666A	EPHA6	EPHA6	100	1000
GR269666A	EPHA7	EPHA7	100	1000
GR269666A	EPHA8	EPHA8	100	1000
GR269666A	EPHB1	EPHB1	100	1000
GR269666A	EPHB2	EPHB2	100	1000
GR269666A	EPHB3	EPHB3	100	1000
GR269666A	EPHB4	EPHB4	100	1000
GR269666A	EPHB6	EPHB6	81	1000
GR269666A	ERBB2	ERBB2	0	1000
GR269666A	ERBB3	ERBB3	20	1000
GR269666A	ERBB4	ERBB4	1.8	1000
GR269666A	ERK1	MAPK3	100	1000
GR269666A	ERK2	MAPK1	100	1000
GR269666A	ERK3	MAPK6	100	1000
GR269666A	ERK4	MAPK4	100	1000
GR269666A	ERK5	MAPK7	100	1000
GR269666A	ERK8	MAPK15	92	1000
GR269666A	ERN1	ERN1	93	1000
GR269666A	FAK	PTK2	100	1000
GR269666A	FER	FER	88	1000
GR269666A	FES	FES	100	1000
GR269666A	FGFR1	FGFR1	100	1000
GR269666A	FGFR2	FGFR2	100	1000
GR269666A	FGFR3	FGFR3	100	1000
GR269666A	FGFR3(G697C)	FGFR3	100	1000
GR269666A	FGFR4	FGFR4	100	1000
GR269666A	FGR	FGR	100	1000
GR269666A	FLT1	FLT1	100	1000
GR269666A	FLT3	FLT3	72	1000
GR269666A	FLT3(D835H)	FLT3	100	1000
GR269666A	FLT3(D835V)	FLT3	83	1000
GR269666A	FLT3(D835Y)	FLT3	97	1000
GR269666A	FLT3(ITD)	FLT3	100	1000
GR269666A	FLT3(ITD,D835V)	FLT3	100	1000
GR269666A	FLT3(ITD,F691L)	FLT3	100	1000
GR269666A	FLT3(K663Q)	FLT3	90	1000
GR269666A	FLT3(N841I)	FLT3	100	1000
GR269666A	FLT3(R834Q)	FLT3	100	1000
GR269666A	FLT3-autoinhibited	FLT3	86	1000
GR269666A	FLT4	FLT4	100	1000
GR269666A	FRK	FRK	100	1000
GR269666A	FYN	FYN	100	1000
GR269666A	GAK	GAK	100	1000
GR269666A	GCN2(Kin.Dom.2,S808G)	EIF2AK4	100	1000
GR269666A	GRK1	GRK1	100	1000
GR269666A	GRK2	ADRBK1	100	1000
GR269666A	GRK3	ADRBK2	100	1000
GR269666A	GRK4	GRK4	91	1000
GR269666A	GRK7	GRK7	100	1000
GR269666A	GSK3A	GSK3A	100	1000
GR269666A	GSK3B	GSK3B	99	1000
GR269666A	HASPIN	GSG2	88	1000
GR269666A	HCK	HCK	100	1000
GR269666A	HIPK1	HIPK1	100	1000
GR269666A	HIPK2	HIPK2	100	1000
GR269666A	HIPK3	HIPK3	100	1000
GR269666A	HIPK4	HIPK4	100	1000
GR269666A	HPK1	MAP4K1	98	1000
GR269666A	HUNK	HUNK	100	1000
GR269666A	ICK	ICK	100	1000
GR269666A	IGF1R	IGF1R	100	1000
GR269666A	IKK-alpha	CHUK	100	1000
GR269666A	IKK-beta	IKBKB	100	1000
GR269666A	IKK-epsilon	IKBKE	100	1000
GR269666A	INSR	INSR	100	1000
GR269666A	INSRR	INSRR	100	1000
GR269666A	IRAK1	IRAK1	100	1000
GR269666A	IRAK3	IRAK3	100	1000
GR269666A	IRAK4	IRAK4	100	1000
GR269666A	ITK	ITK	100	1000
GR269666A	JAK1(JH1domain-catalytic)	JAK1	100	1000
GR269666A	JAK1(JH2domain-pseudokinase)	JAK1	88	1000
GR269666A	JAK2(JH1domain-catalytic)	JAK2	100	1000
GR269666A	JAK3(JH1domain-catalytic)	JAK3	100	1000
GR269666A	JNK1	MAPK8	91	1000
GR269666A	JNK2	MAPK9	100	1000
GR269666A	JNK3	MAPK10	100	1000
GR269666A	KIT	KIT	94	1000
GR269666A	KIT(A829P)	KIT	100	1000
GR269666A	KIT(D816H)	KIT	100	1000
GR269666A	KIT(D816V)	KIT	100	1000
GR269666A	KIT(L576P)	KIT	100	1000
GR269666A	KIT(V559D)	KIT	91	1000
GR269666A	KIT(V559D,T670I)	KIT	100	1000
GR269666A	KIT(V559D,V654A)	KIT	85	1000
GR269666A	KIT-autoinhibited	KIT	100	1000
GR269666A	LATS1	LATS1	100	1000
GR269666A	LATS2	LATS2	100	1000
GR269666A	LCK	LCK	88	1000
GR269666A	LIMK1	LIMK1	100	1000
GR269666A	LIMK2	LIMK2	100	1000
GR269666A	LKB1	STK11	100	1000
GR269666A	LOK	STK10	100	1000
GR269666A	LRRK2	LRRK2	100	1000
GR269666A	LRRK2(G2019S)	LRRK2	100	1000
GR269666A	LTK	LTK	100	1000
GR269666A	LYN	LYN	93	1000
GR269666A	LZK	MAP3K13	100	1000
GR269666A	MAK	MAK	100	1000
GR269666A	MAP3K1	MAP3K1	100	1000
GR269666A	MAP3K15	MAP3K15	100	1000
GR269666A	MAP3K2	MAP3K2	100	1000
GR269666A	MAP3K3	MAP3K3	100	1000
GR269666A	MAP3K4	MAP3K4	100	1000
GR269666A	MAP4K2	MAP4K2	92	1000
GR269666A	MAP4K3	MAP4K3	100	1000
GR269666A	MAP4K4	MAP4K4	100	1000
GR269666A	MAP4K5	MAP4K5	100	1000
GR269666A	MAPKAPK2	MAPKAPK2	76	1000
GR269666A	MAPKAPK5	MAPKAPK5	100	1000
GR269666A	MARK1	MARK1	100	1000
GR269666A	MARK2	MARK2	100	1000
GR269666A	MARK3	MARK3	97	1000
GR269666A	MARK4	MARK4	96	1000
GR269666A	MAST1	MAST1	100	1000
GR269666A	MEK1	MAP2K1	100	1000
GR269666A	MEK2	MAP2K2	100	1000
GR269666A	MEK3	MAP2K3	100	1000
GR269666A	MEK4	MAP2K4	100	1000
GR269666A	MEK5	MAP2K5	2.6	1000
GR269666A	MEK6	MAP2K6	92	1000
GR269666A	MELK	MELK	100	1000
GR269666A	MERTK	MERTK	100	1000
GR269666A	MET	MET	100	1000
GR269666A	MET(M1250T)	MET	100	1000
GR269666A	MET(Y1235D)	MET	91	1000
GR269666A	MINK	MINK1	92	1000
GR269666A	MKK7	MAP2K7	100	1000
GR269666A	MKNK1	MKNK1	86	1000
GR269666A	MKNK2	MKNK2	100	1000
GR269666A	MLCK	MYLK3	100	1000
GR269666A	MLK1	MAP3K9	100	1000
GR269666A	MLK2	MAP3K10	100	1000
GR269666A	MLK3	MAP3K11	91	1000
GR269666A	MRCKA	CDC42BPA	100	1000
GR269666A	MRCKB	CDC42BPB	100	1000
GR269666A	MST1	STK4	100	1000
GR269666A	MST1R	MST1R	100	1000
GR269666A	MST2	STK3	100	1000
GR269666A	MST3	STK24	100	1000
GR269666A	MST4	MST4	100	1000
GR269666A	MTOR	MTOR	100	1000
GR269666A	MUSK	MUSK	100	1000
GR269666A	MYLK	MYLK	100	1000
GR269666A	MYLK2	MYLK2	100	1000
GR269666A	MYLK4	MYLK4	100	1000
GR269666A	MYO3A	MYO3A	100	1000
GR269666A	MYO3B	MYO3B	100	1000
GR269666A	NDR1	STK38	100	1000
GR269666A	NDR2	STK38L	100	1000
GR269666A	NEK1	NEK1	99	1000
GR269666A	NEK10	NEK10	100	1000
GR269666A	NEK11	NEK11	100	1000
GR269666A	NEK2	NEK2	100	1000
GR269666A	NEK3	NEK3	100	1000
GR269666A	NEK4	NEK4	100	1000
GR269666A	NEK5	NEK5	100	1000
GR269666A	NEK6	NEK6	100	1000
GR269666A	NEK7	NEK7	100	1000
GR269666A	NEK9	NEK9	100	1000
GR269666A	NIK	MAP3K14	100	1000
GR269666A	NIM1	MGC42105	94	1000
GR269666A	NLK	NLK	100	1000
GR269666A	OSR1	OXSR1	100	1000
GR269666A	p38-alpha	MAPK14	100	1000
GR269666A	p38-beta	MAPK11	100	1000
GR269666A	p38-delta	MAPK13	100	1000
GR269666A	p38-gamma	MAPK12	100	1000
GR269666A	PAK1	PAK1	100	1000
GR269666A	PAK2	PAK2	100	1000
GR269666A	PAK3	PAK3	100	1000
GR269666A	PAK4	PAK4	100	1000
GR269666A	PAK6	PAK6	100	1000
GR269666A	PAK7	PAK7	100	1000
GR269666A	PCTK1	CDK16	100	1000
GR269666A	PCTK2	CDK17	100	1000
GR269666A	PCTK3	CDK18	100	1000
GR269666A	PDGFRA	PDGFRA	49	1000
GR269666A	PDGFRB	PDGFRB	100	1000
GR269666A	PDPK1	PDPK1	100	1000
GR269666A	PFCDPK1(P.falciparum)	CDPK1	83	1000
GR269666A	PFPK5(P.falciparum)	MAL13P1.279	100	1000
GR269666A	PFTAIRE2	CDK15	100	1000
GR269666A	PFTK1	CDK14	100	1000
GR269666A	PHKG1	PHKG1	100	1000
GR269666A	PHKG2	PHKG2	97	1000
GR269666A	PIK3C2B	PIK3C2B	100	1000
GR269666A	PIK3C2G	PIK3C2G	89	1000
GR269666A	PIK3CA	PIK3CA	100	1000
GR269666A	PIK3CA(C420R)	PIK3CA	100	1000
GR269666A	PIK3CA(E542K)	PIK3CA	100	1000
GR269666A	PIK3CA(E545A)	PIK3CA	100	1000
GR269666A	PIK3CA(E545K)	PIK3CA	99	1000
GR269666A	PIK3CA(H1047L)	PIK3CA	100	1000
GR269666A	PIK3CA(H1047Y)	PIK3CA	100	1000
GR269666A	PIK3CA(I800L)	PIK3CA	100	1000
GR269666A	PIK3CA(M1043I)	PIK3CA	100	1000
GR269666A	PIK3CA(Q546K)	PIK3CA	100	1000
GR269666A	PIK3CB	PIK3CB	100	1000
GR269666A	PIK3CD	PIK3CD	98	1000
GR269666A	PIK3CG	PIK3CG	100	1000
GR269666A	PIK4CB	PI4KB	100	1000
GR269666A	PIKFYVE	PIKFYVE	100	1000
GR269666A	PIM1	PIM1	100	1000
GR269666A	PIM2	PIM2	100	1000
GR269666A	PIM3	PIM3	100	1000
GR269666A	PIP5K1A	PIP5K1A	100	1000
GR269666A	PIP5K1C	PIP5K1C	86	1000
GR269666A	PIP5K2B	PIP4K2B	100	1000
GR269666A	PIP5K2C	PIP4K2C	71	1000
GR269666A	PKAC-alpha	PRKACA	100	1000
GR269666A	PKAC-beta	PRKACB	100	1000
GR269666A	PKMYT1	PKMYT1	100	1000
GR269666A	PKN1	PKN1	92	1000
GR269666A	PKN2	PKN2	100	1000
GR269666A	PKNB(M.tuberculosis)	pknB	100	1000
GR269666A	PLK1	PLK1	80	1000
GR269666A	PLK2	PLK2	100	1000
GR269666A	PLK3	PLK3	100	1000
GR269666A	PLK4	PLK4	100	1000
GR269666A	PRKCD	PRKCD	100	1000
GR269666A	PRKCE	PRKCE	78	1000
GR269666A	PRKCH	PRKCH	100	1000
GR269666A	PRKCI	PRKCI	100	1000
GR269666A	PRKCQ	PRKCQ	88	1000
GR269666A	PRKD1	PRKD1	100	1000
GR269666A	PRKD2	PRKD2	100	1000
GR269666A	PRKD3	PRKD3	100	1000
GR269666A	PRKG1	PRKG1	100	1000
GR269666A	PRKG2	PRKG2	100	1000
GR269666A	PRKR	EIF2AK2	84	1000
GR269666A	PRKX	PRKX	100	1000
GR269666A	PRP4	PRPF4B	100	1000
GR269666A	PYK2	PTK2B	100	1000
GR269666A	QSK	KIAA0999	100	1000
GR269666A	RAF1	RAF1	100	1000
GR269666A	RET	RET	100	1000
GR269666A	RET(M918T)	RET	100	1000
GR269666A	RET(V804L)	RET	100	1000
GR269666A	RET(V804M)	RET	100	1000
GR269666A	RIOK1	RIOK1	100	1000
GR269666A	RIOK2	RIOK2	88	1000
GR269666A	RIOK3	RIOK3	100	1000
GR269666A	RIPK1	RIPK1	100	1000
GR269666A	RIPK2	RIPK2	67	1000
GR269666A	RIPK4	RIPK4	98	1000
GR269666A	RIPK5	DSTYK	98	1000
GR269666A	ROCK1	ROCK1	100	1000
GR269666A	ROCK2	ROCK2	98	1000
GR269666A	ROS1	ROS1	76	1000
GR269666A	RPS6KA4(Kin.Dom.1-N-terminal)	RPS6KA4	100	1000
GR269666A	RPS6KA4(Kin.Dom.2-C-terminal)	RPS6KA4	100	1000
GR269666A	RPS6KA5(Kin.Dom.1-N-terminal)	RPS6KA5	100	1000
GR269666A	RPS6KA5(Kin.Dom.2-C-terminal)	RPS6KA5	100	1000
GR269666A	RSK1(Kin.Dom.1-N-terminal)	RPS6KA1	100	1000
GR269666A	RSK1(Kin.Dom.2-C-terminal)	RPS6KA1	100	1000
GR269666A	RSK2(Kin.Dom.1-N-terminal)	RPS6KA3	100	1000
GR269666A	RSK2(Kin.Dom.2-C-terminal)	RPS6KA3	97	1000
GR269666A	RSK3(Kin.Dom.1-N-terminal)	RPS6KA2	100	1000
GR269666A	RSK3(Kin.Dom.2-C-terminal)	RPS6KA2	100	1000
GR269666A	RSK4(Kin.Dom.1-N-terminal)	RPS6KA6	100	1000
GR269666A	RSK4(Kin.Dom.2-C-terminal)	RPS6KA6	98	1000
GR269666A	S6K1	RPS6KB1	100	1000
GR269666A	SBK1	SBK1	100	1000
GR269666A	SGK	SGK1	100	1000
GR269666A	SgK110	SgK110	100	1000
GR269666A	SGK2	SGK2	100	1000
GR269666A	SGK3	SGK3	81	1000
GR269666A	SIK	SIK1	100	1000
GR269666A	SIK2	SIK2	82	1000
GR269666A	SLK	SLK	100	1000
GR269666A	SNARK	NUAK2	100	1000
GR269666A	SNRK	SNRK	100	1000
GR269666A	SRC	SRC	100	1000
GR269666A	SRMS	SRMS	100	1000
GR269666A	SRPK1	SRPK1	100	1000
GR269666A	SRPK2	SRPK2	100	1000
GR269666A	SRPK3	SRPK3	78	1000
GR269666A	STK16	STK16	100	1000
GR269666A	STK33	STK33	97	1000
GR269666A	STK35	STK35	100	1000
GR269666A	STK36	STK36	100	1000
GR269666A	STK39	STK39	100	1000
GR269666A	SYK	SYK	100	1000
GR269666A	TAK1	MAP3K7	100	1000
GR269666A	TAOK1	TAOK1	100	1000
GR269666A	TAOK2	TAOK2	100	1000
GR269666A	TAOK3	TAOK3	100	1000
GR269666A	TBK1	TBK1	100	1000
GR269666A	TEC	TEC	100	1000
GR269666A	TESK1	TESK1	100	1000
GR269666A	TGFBR1	TGFBR1	100	1000
GR269666A	TGFBR2	TGFBR2	100	1000
GR269666A	TIE1	TIE1	100	1000
GR269666A	TIE2	TEK	100	1000
GR269666A	TLK1	TLK1	100	1000
GR269666A	TLK2	TLK2	100	1000
GR269666A	TNIK	TNIK	100	1000
GR269666A	TNK1	TNK1	100	1000
GR269666A	TNK2	TNK2	100	1000
GR269666A	TNNI3K	TNNI3K	84	1000
GR269666A	TRKA	NTRK1	100	1000
GR269666A	TRKB	NTRK2	92	1000
GR269666A	TRKC	NTRK3	100	1000
GR269666A	TRPM6	TRPM6	97	1000
GR269666A	TSSK1B	TSSK1B	70	1000
GR269666A	TSSK3	TSSK3	100	1000
GR269666A	TTK	TTK	51	1000
GR269666A	TXK	TXK	100	1000
GR269666A	TYK2(JH1domain-catalytic)	TYK2	100	1000
GR269666A	TYK2(JH2domain-pseudokinase)	TYK2	100	1000
GR269666A	TYRO3	TYRO3	90	1000
GR269666A	ULK1	ULK1	67	1000
GR269666A	ULK2	ULK2	100	1000
GR269666A	ULK3	ULK3	93	1000
GR269666A	VEGFR2	KDR	72	1000
GR269666A	VPS34	PIK3C3	100	1000
GR269666A	VRK2	VRK2	100	1000
GR269666A	WEE1	WEE1	100	1000
GR269666A	WEE2	WEE2	100	1000
GR269666A	WNK1	WNK1	100	1000
GR269666A	WNK2	WNK2	100	1000
GR269666A	WNK3	WNK3	100	1000
GR269666A	WNK4	WNK4	100	1000
GR269666A	YANK1	STK32A	100	1000
GR269666A	YANK2	STK32B	100	1000
GR269666A	YANK3	STK32C	100	1000
GR269666A	YES	YES1	100	1000
GR269666A	YSK1	STK25	87	1000
GR269666A	YSK4	MAP3K19	100	1000
GR269666A	ZAK	ZAK	100	1000
GR269666A	ZAP70	ZAP70	90	1000
GSK1392956A	AAK1	AAK1	64	1000
GSK1392956A	ABL1(E255K)-phosphorylated	ABL1	100	1000
GSK1392956A	ABL1(F317I)-nonphosphorylated	ABL1	100	1000
GSK1392956A	ABL1(F317I)-phosphorylated	ABL1	87	1000
GSK1392956A	ABL1(F317L)-nonphosphorylated	ABL1	95	1000
GSK1392956A	ABL1(F317L)-phosphorylated	ABL1	49	1000
GSK1392956A	ABL1(H396P)-nonphosphorylated	ABL1	97	1000
GSK1392956A	ABL1(H396P)-phosphorylated	ABL1	100	1000
GSK1392956A	ABL1(M351T)-phosphorylated	ABL1	97	1000
GSK1392956A	ABL1(Q252H)-nonphosphorylated	ABL1	100	1000
GSK1392956A	ABL1(Q252H)-phosphorylated	ABL1	100	1000
GSK1392956A	ABL1(T315I)-nonphosphorylated	ABL1	100	1000
GSK1392956A	ABL1(T315I)-phosphorylated	ABL1	100	1000
GSK1392956A	ABL1(Y253F)-phosphorylated	ABL1	100	1000
GSK1392956A	ABL1-nonphosphorylated	ABL1	100	1000
GSK1392956A	ABL1-phosphorylated	ABL1	100	1000
GSK1392956A	ABL2	ABL2	100	1000
GSK1392956A	ACVR1	ACVR1	100	1000
GSK1392956A	ACVR1B	ACVR1B	100	1000
GSK1392956A	ACVR2A	ACVR2A	100	1000
GSK1392956A	ACVR2B	ACVR2B	100	1000
GSK1392956A	ACVRL1	ACVRL1	86	1000
GSK1392956A	ADCK3	CABC1	94	1000
GSK1392956A	ADCK4	ADCK4	100	1000
GSK1392956A	AKT1	AKT1	83	1000
GSK1392956A	AKT2	AKT2	100	1000
GSK1392956A	AKT3	AKT3	100	1000
GSK1392956A	ALK	ALK	0.2	1000
GSK1392956A	ALK(C1156Y)	ALK	0.1	1000
GSK1392956A	ALK(L1196M)	ALK	1.1	1000
GSK1392956A	AMPK-alpha1	PRKAA1	100	1000
GSK1392956A	AMPK-alpha2	PRKAA2	100	1000
GSK1392956A	ANKK1	ANKK1	92	1000
GSK1392956A	ARK5	NUAK1	67	1000
GSK1392956A	ASK1	MAP3K5	100	1000
GSK1392956A	ASK2	MAP3K6	73	1000
GSK1392956A	AURKA	AURKA	95	1000
GSK1392956A	AURKB	AURKB	91	1000
GSK1392956A	AURKC	AURKC	90	1000
GSK1392956A	AXL	AXL	46	1000
GSK1392956A	BIKE	BMP2K	81	1000
GSK1392956A	BLK	BLK	99	1000
GSK1392956A	BMPR1A	BMPR1A	100	1000
GSK1392956A	BMPR1B	BMPR1B	88	1000
GSK1392956A	BMPR2	BMPR2	97	1000
GSK1392956A	BMX	BMX	100	1000
GSK1392956A	BRAF	BRAF	94	1000
GSK1392956A	BRAF(V600E)	BRAF	90	1000
GSK1392956A	BRK	PTK6	100	1000
GSK1392956A	BRSK1	BRSK1	100	1000
GSK1392956A	BRSK2	BRSK2	100	1000
GSK1392956A	BTK	BTK	100	1000
GSK1392956A	BUB1	BUB1	88	1000
GSK1392956A	CAMK1	CAMK1	73	1000
GSK1392956A	CAMK1B	PNCK	60	1000
GSK1392956A	CAMK1D	CAMK1D	40	1000
GSK1392956A	CAMK1G	CAMK1G	75	1000
GSK1392956A	CAMK2A	CAMK2A	69	1000
GSK1392956A	CAMK2B	CAMK2B	64	1000
GSK1392956A	CAMK2D	CAMK2D	87	1000
GSK1392956A	CAMK2G	CAMK2G	90	1000
GSK1392956A	CAMK4	CAMK4	57	1000
GSK1392956A	CAMKK1	CAMKK1	79	1000
GSK1392956A	CAMKK2	CAMKK2	45	1000
GSK1392956A	CASK	CASK	78	1000
GSK1392956A	CDC2L1	CDK11B	100	1000
GSK1392956A	CDC2L2	CDC2L2	100	1000
GSK1392956A	CDC2L5	CDK13	64	1000
GSK1392956A	CDK11	CDK19	91	1000
GSK1392956A	CDK2	CDK2	86	1000
GSK1392956A	CDK3	CDK3	100	1000
GSK1392956A	CDK4	CDK4	89	1000
GSK1392956A	CDK4-cyclinD1	CDK4	85	1000
GSK1392956A	CDK4-cyclinD3	CDK4	100	1000
GSK1392956A	CDK5	CDK5	100	1000
GSK1392956A	CDK7	CDK7	93	1000
GSK1392956A	CDK8	CDK8	100	1000
GSK1392956A	CDK9	CDK9	100	1000
GSK1392956A	CDKL1	CDKL1	100	1000
GSK1392956A	CDKL2	CDKL2	100	1000
GSK1392956A	CDKL3	CDKL3	100	1000
GSK1392956A	CDKL5	CDKL5	43	1000
GSK1392956A	CHEK1	CHEK1	94	1000
GSK1392956A	CHEK2	CHEK2	0.2	1000
GSK1392956A	CIT	CIT	80	1000
GSK1392956A	CLK1	CLK1	1.6	1000
GSK1392956A	CLK2	CLK2	2.6	1000
GSK1392956A	CLK3	CLK3	77	1000
GSK1392956A	CLK4	CLK4	7.5	1000
GSK1392956A	CSF1R	CSF1R	100	1000
GSK1392956A	CSF1R-autoinhibited	CSF1R	100	1000
GSK1392956A	CSK	CSK	86	1000
GSK1392956A	CSNK1A1	CSNK1A1	35	1000
GSK1392956A	CSNK1A1L	CSNK1A1L	68	1000
GSK1392956A	CSNK1D	CSNK1D	31	1000
GSK1392956A	CSNK1E	CSNK1E	46	1000
GSK1392956A	CSNK1G1	CSNK1G1	52	1000
GSK1392956A	CSNK1G2	CSNK1G2	32	1000
GSK1392956A	CSNK1G3	CSNK1G3	29	1000
GSK1392956A	CSNK2A1	CSNK2A1	51	1000
GSK1392956A	CSNK2A2	CSNK2A2	88	1000
GSK1392956A	CTK	MATK	95	1000
GSK1392956A	DAPK1	DAPK1	13	1000
GSK1392956A	DAPK2	DAPK2	6.8	1000
GSK1392956A	DAPK3	DAPK3	4.3	1000
GSK1392956A	DCAMKL1	DCLK1	78	1000
GSK1392956A	DCAMKL2	DCLK2	100	1000
GSK1392956A	DCAMKL3	DCLK3	100	1000
GSK1392956A	DDR1	DDR1	98	1000
GSK1392956A	DDR2	DDR2	100	1000
GSK1392956A	DLK	MAP3K12	77	1000
GSK1392956A	DMPK	DMPK	100	1000
GSK1392956A	DMPK2	CDC42BPG	75	1000
GSK1392956A	DRAK1	STK17A	87	1000
GSK1392956A	DRAK2	STK17B	93	1000
GSK1392956A	DYRK1A	DYRK1A	53	1000
GSK1392956A	DYRK1B	DYRK1B	75	1000
GSK1392956A	DYRK2	DYRK2	24	1000
GSK1392956A	EGFR	EGFR	76	1000
GSK1392956A	EGFR(E746-A750del)	EGFR	74	1000
GSK1392956A	EGFR(G719C)	EGFR	94	1000
GSK1392956A	EGFR(G719S)	EGFR	87	1000
GSK1392956A	EGFR(L747-E749del, A750P)	EGFR	83	1000
GSK1392956A	EGFR(L747-S752del, P753S)	EGFR	71	1000
GSK1392956A	EGFR(L747-T751del,Sins)	EGFR	94	1000
GSK1392956A	EGFR(L858R)	EGFR	73	1000
GSK1392956A	EGFR(L858R,T790M)	EGFR	7.6	1000
GSK1392956A	EGFR(L861Q)	EGFR	60	1000
GSK1392956A	EGFR(S752-I759del)	EGFR	86	1000
GSK1392956A	EGFR(T790M)	EGFR	4.4	1000
GSK1392956A	EIF2AK1	EIF2AK1	100	1000
GSK1392956A	EPHA1	EPHA1	91	1000
GSK1392956A	EPHA2	EPHA2	94	1000
GSK1392956A	EPHA3	EPHA3	70	1000
GSK1392956A	EPHA4	EPHA4	100	1000
GSK1392956A	EPHA5	EPHA5	100	1000
GSK1392956A	EPHA6	EPHA6	72	1000
GSK1392956A	EPHA7	EPHA7	100	1000
GSK1392956A	EPHA8	EPHA8	100	1000
GSK1392956A	EPHB1	EPHB1	100	1000
GSK1392956A	EPHB2	EPHB2	100	1000
GSK1392956A	EPHB3	EPHB3	69	1000
GSK1392956A	EPHB4	EPHB4	81	1000
GSK1392956A	EPHB6	EPHB6	93	1000
GSK1392956A	ERBB2	ERBB2	85	1000
GSK1392956A	ERBB3	ERBB3	50	1000
GSK1392956A	ERBB4	ERBB4	73	1000
GSK1392956A	ERK1	MAPK3	100	1000
GSK1392956A	ERK2	MAPK1	99	1000
GSK1392956A	ERK3	MAPK6	66	1000
GSK1392956A	ERK4	MAPK4	100	1000
GSK1392956A	ERK5	MAPK7	99	1000
GSK1392956A	ERK8	MAPK15	100	1000
GSK1392956A	ERN1	ERN1	43	1000
GSK1392956A	FAK	PTK2	4.5	1000
GSK1392956A	FER	FER	43	1000
GSK1392956A	FES	FES	58	1000
GSK1392956A	FGFR1	FGFR1	100	1000
GSK1392956A	FGFR2	FGFR2	97	1000
GSK1392956A	FGFR3	FGFR3	97	1000
GSK1392956A	FGFR3(G697C)	FGFR3	98	1000
GSK1392956A	FGFR4	FGFR4	95	1000
GSK1392956A	FGR	FGR	81	1000
GSK1392956A	FLT1	FLT1	94	1000
GSK1392956A	FLT3	FLT3	78	1000
GSK1392956A	FLT3(D835H)	FLT3	100	1000
GSK1392956A	FLT3(D835V)	FLT3	69	1000
GSK1392956A	FLT3(D835Y)	FLT3	68	1000
GSK1392956A	FLT3(ITD)	FLT3	88	1000
GSK1392956A	FLT3(ITD,D835V)	FLT3	79	1000
GSK1392956A	FLT3(ITD,F691L)	FLT3	40	1000
GSK1392956A	FLT3(K663Q)	FLT3	100	1000
GSK1392956A	FLT3(N841I)	FLT3	74	1000
GSK1392956A	FLT3(R834Q)	FLT3	100	1000
GSK1392956A	FLT3-autoinhibited	FLT3	95	1000
GSK1392956A	FLT4	FLT4	85	1000
GSK1392956A	FRK	FRK	100	1000
GSK1392956A	FYN	FYN	100	1000
GSK1392956A	GAK	GAK	6.9	1000
GSK1392956A	GCN2(Kin.Dom.2,S808G)	EIF2AK4	48	1000
GSK1392956A	GRK1	GRK1	91	1000
GSK1392956A	GRK2	ADRBK1	100	1000
GSK1392956A	GRK3	ADRBK2	67	1000
GSK1392956A	GRK4	GRK4	94	1000
GSK1392956A	GRK7	GRK7	93	1000
GSK1392956A	GSK3A	GSK3A	100	1000
GSK1392956A	GSK3B	GSK3B	98	1000
GSK1392956A	HASPIN	GSG2	86	1000
GSK1392956A	HCK	HCK	100	1000
GSK1392956A	HIPK1	HIPK1	15	1000
GSK1392956A	HIPK2	HIPK2	23	1000
GSK1392956A	HIPK3	HIPK3	44	1000
GSK1392956A	HIPK4	HIPK4	1.4	1000
GSK1392956A	HPK1	MAP4K1	86	1000
GSK1392956A	HUNK	HUNK	83	1000
GSK1392956A	ICK	ICK	100	1000
GSK1392956A	IGF1R	IGF1R	9.8	1000
GSK1392956A	IKK-alpha	CHUK	100	1000
GSK1392956A	IKK-beta	IKBKB	97	1000
GSK1392956A	IKK-epsilon	IKBKE	78	1000
GSK1392956A	INSR	INSR	1.1	1000
GSK1392956A	INSRR	INSRR	1.4	1000
GSK1392956A	IRAK1	IRAK1	90	1000
GSK1392956A	IRAK3	IRAK3	86	1000
GSK1392956A	IRAK4	IRAK4	89	1000
GSK1392956A	ITK	ITK	100	1000
GSK1392956A	JAK1(JH1domain-catalytic)	JAK1	94	1000
GSK1392956A	JAK1(JH2domain-pseudokinase)	JAK1	89	1000
GSK1392956A	JAK2(JH1domain-catalytic)	JAK2	100	1000
GSK1392956A	JAK3(JH1domain-catalytic)	JAK3	88	1000
GSK1392956A	JNK1	MAPK8	0	1000
GSK1392956A	JNK2	MAPK9	0.1	1000
GSK1392956A	JNK3	MAPK10	0.1	1000
GSK1392956A	KIT	KIT	100	1000
GSK1392956A	KIT(A829P)	KIT	88	1000
GSK1392956A	KIT(D816H)	KIT	57	1000
GSK1392956A	KIT(D816V)	KIT	100	1000
GSK1392956A	KIT(L576P)	KIT	100	1000
GSK1392956A	KIT(V559D)	KIT	100	1000
GSK1392956A	KIT(V559D,T670I)	KIT	96	1000
GSK1392956A	KIT(V559D,V654A)	KIT	98	1000
GSK1392956A	KIT-autoinhibited	KIT	100	1000
GSK1392956A	LATS1	LATS1	100	1000
GSK1392956A	LATS2	LATS2	95	1000
GSK1392956A	LCK	LCK	100	1000
GSK1392956A	LIMK1	LIMK1	92	1000
GSK1392956A	LIMK2	LIMK2	75	1000
GSK1392956A	LKB1	STK11	81	1000
GSK1392956A	LOK	STK10	100	1000
GSK1392956A	LRRK2	LRRK2	12	1000
GSK1392956A	LRRK2(G2019S)	LRRK2	5.4	1000
GSK1392956A	LTK	LTK	66	1000
GSK1392956A	LYN	LYN	92	1000
GSK1392956A	LZK	MAP3K13	100	1000
GSK1392956A	MAK	MAK	100	1000
GSK1392956A	MAP3K1	MAP3K1	86	1000
GSK1392956A	MAP3K15	MAP3K15	93	1000
GSK1392956A	MAP3K2	MAP3K2	100	1000
GSK1392956A	MAP3K3	MAP3K3	88	1000
GSK1392956A	MAP3K4	MAP3K4	94	1000
GSK1392956A	MAP4K2	MAP4K2	91	1000
GSK1392956A	MAP4K3	MAP4K3	100	1000
GSK1392956A	MAP4K4	MAP4K4	94	1000
GSK1392956A	MAP4K5	MAP4K5	96	1000
GSK1392956A	MAPKAPK2	MAPKAPK2	85	1000
GSK1392956A	MAPKAPK5	MAPKAPK5	94	1000
GSK1392956A	MARK1	MARK1	90	1000
GSK1392956A	MARK2	MARK2	59	1000
GSK1392956A	MARK3	MARK3	86	1000
GSK1392956A	MARK4	MARK4	100	1000
GSK1392956A	MAST1	MAST1	43	1000
GSK1392956A	MEK1	MAP2K1	100	1000
GSK1392956A	MEK2	MAP2K2	100	1000
GSK1392956A	MEK3	MAP2K3	23	1000
GSK1392956A	MEK4	MAP2K4	77	1000
GSK1392956A	MEK5	MAP2K5	96	1000
GSK1392956A	MEK6	MAP2K6	67	1000
GSK1392956A	MELK	MELK	57	1000
GSK1392956A	MERTK	MERTK	77	1000
GSK1392956A	MET	MET	100	1000
GSK1392956A	MET(M1250T)	MET	78	1000
GSK1392956A	MET(Y1235D)	MET	100	1000
GSK1392956A	MINK	MINK1	80	1000
GSK1392956A	MKK7	MAP2K7	100	1000
GSK1392956A	MKNK1	MKNK1	61	1000
GSK1392956A	MKNK2	MKNK2	97	1000
GSK1392956A	MLCK	MYLK3	96	1000
GSK1392956A	MLK1	MAP3K9	100	1000
GSK1392956A	MLK2	MAP3K10	100	1000
GSK1392956A	MLK3	MAP3K11	100	1000
GSK1392956A	MRCKA	CDC42BPA	100	1000
GSK1392956A	MRCKB	CDC42BPB	100	1000
GSK1392956A	MST1	STK4	100	1000
GSK1392956A	MST1R	MST1R	100	1000
GSK1392956A	MST2	STK3	92	1000
GSK1392956A	MST3	STK24	90	1000
GSK1392956A	MST4	MST4	94	1000
GSK1392956A	MTOR	MTOR	100	1000
GSK1392956A	MUSK	MUSK	100	1000
GSK1392956A	MYLK	MYLK	0.3	1000
GSK1392956A	MYLK2	MYLK2	100	1000
GSK1392956A	MYLK4	MYLK4	82	1000
GSK1392956A	MYO3A	MYO3A	88	1000
GSK1392956A	MYO3B	MYO3B	100	1000
GSK1392956A	NDR1	STK38	99	1000
GSK1392956A	NDR2	STK38L	91	1000
GSK1392956A	NEK1	NEK1	82	1000
GSK1392956A	NEK10	NEK10	34	1000
GSK1392956A	NEK11	NEK11	100	1000
GSK1392956A	NEK2	NEK2	99	1000
GSK1392956A	NEK3	NEK3	100	1000
GSK1392956A	NEK4	NEK4	100	1000
GSK1392956A	NEK5	NEK5	83	1000
GSK1392956A	NEK6	NEK6	100	1000
GSK1392956A	NEK7	NEK7	100	1000
GSK1392956A	NEK9	NEK9	100	1000
GSK1392956A	NIK	MAP3K14	100	1000
GSK1392956A	NIM1	MGC42105	96	1000
GSK1392956A	NLK	NLK	100	1000
GSK1392956A	OSR1	OXSR1	89	1000
GSK1392956A	p38-alpha	MAPK14	100	1000
GSK1392956A	p38-beta	MAPK11	100	1000
GSK1392956A	p38-delta	MAPK13	100	1000
GSK1392956A	p38-gamma	MAPK12	91	1000
GSK1392956A	PAK1	PAK1	100	1000
GSK1392956A	PAK2	PAK2	100	1000
GSK1392956A	PAK3	PAK3	100	1000
GSK1392956A	PAK4	PAK4	100	1000
GSK1392956A	PAK6	PAK6	89	1000
GSK1392956A	PAK7	PAK7	67	1000
GSK1392956A	PCTK1	CDK16	82	1000
GSK1392956A	PCTK2	CDK17	100	1000
GSK1392956A	PCTK3	CDK18	100	1000
GSK1392956A	PDGFRA	PDGFRA	91	1000
GSK1392956A	PDGFRB	PDGFRB	100	1000
GSK1392956A	PDPK1	PDPK1	91	1000
GSK1392956A	PFCDPK1(P.falciparum)	CDPK1	94	1000
GSK1392956A	PFPK5(P.falciparum)	MAL13P1.279	74	1000
GSK1392956A	PFTAIRE2	CDK15	100	1000
GSK1392956A	PFTK1	CDK14	100	1000
GSK1392956A	PHKG1	PHKG1	29	1000
GSK1392956A	PHKG2	PHKG2	39	1000
GSK1392956A	PIK3C2B	PIK3C2B	100	1000
GSK1392956A	PIK3C2G	PIK3C2G	96	1000
GSK1392956A	PIK3CA	PIK3CA	100	1000
GSK1392956A	PIK3CA(C420R)	PIK3CA	99	1000
GSK1392956A	PIK3CA(E542K)	PIK3CA	100	1000
GSK1392956A	PIK3CA(E545A)	PIK3CA	100	1000
GSK1392956A	PIK3CA(E545K)	PIK3CA	95	1000
GSK1392956A	PIK3CA(H1047L)	PIK3CA	100	1000
GSK1392956A	PIK3CA(H1047Y)	PIK3CA	83	1000
GSK1392956A	PIK3CA(I800L)	PIK3CA	97	1000
GSK1392956A	PIK3CA(M1043I)	PIK3CA	97	1000
GSK1392956A	PIK3CA(Q546K)	PIK3CA	100	1000
GSK1392956A	PIK3CB	PIK3CB	96	1000
GSK1392956A	PIK3CD	PIK3CD	80	1000
GSK1392956A	PIK3CG	PIK3CG	100	1000
GSK1392956A	PIK4CB	PI4KB	100	1000
GSK1392956A	PIKFYVE	PIKFYVE	95	1000
GSK1392956A	PIM1	PIM1	100	1000
GSK1392956A	PIM2	PIM2	100	1000
GSK1392956A	PIM3	PIM3	100	1000
GSK1392956A	PIP5K1A	PIP5K1A	100	1000
GSK1392956A	PIP5K1C	PIP5K1C	100	1000
GSK1392956A	PIP5K2B	PIP4K2B	100	1000
GSK1392956A	PIP5K2C	PIP4K2C	94	1000
GSK1392956A	PKAC-alpha	PRKACA	100	1000
GSK1392956A	PKAC-beta	PRKACB	100	1000
GSK1392956A	PKMYT1	PKMYT1	100	1000
GSK1392956A	PKN1	PKN1	100	1000
GSK1392956A	PKN2	PKN2	100	1000
GSK1392956A	PKNB(M.tuberculosis)	pknB	99	1000
GSK1392956A	PLK1	PLK1	6.3	1000
GSK1392956A	PLK2	PLK2	100	1000
GSK1392956A	PLK3	PLK3	96	1000
GSK1392956A	PLK4	PLK4	41	1000
GSK1392956A	PRKCD	PRKCD	100	1000
GSK1392956A	PRKCE	PRKCE	100	1000
GSK1392956A	PRKCH	PRKCH	100	1000
GSK1392956A	PRKCI	PRKCI	97	1000
GSK1392956A	PRKCQ	PRKCQ	95	1000
GSK1392956A	PRKD1	PRKD1	79	1000
GSK1392956A	PRKD2	PRKD2	57	1000
GSK1392956A	PRKD3	PRKD3	49	1000
GSK1392956A	PRKG1	PRKG1	100	1000
GSK1392956A	PRKG2	PRKG2	100	1000
GSK1392956A	PRKR	EIF2AK2	80	1000
GSK1392956A	PRKX	PRKX	80	1000
GSK1392956A	PRP4	PRPF4B	100	1000
GSK1392956A	PYK2	PTK2B	2.4	1000
GSK1392956A	QSK	KIAA0999	100	1000
GSK1392956A	RAF1	RAF1	100	1000
GSK1392956A	RET	RET	85	1000
GSK1392956A	RET(M918T)	RET	93	1000
GSK1392956A	RET(V804L)	RET	86	1000
GSK1392956A	RET(V804M)	RET	88	1000
GSK1392956A	RIOK1	RIOK1	66	1000
GSK1392956A	RIOK2	RIOK2	27	1000
GSK1392956A	RIOK3	RIOK3	79	1000
GSK1392956A	RIPK1	RIPK1	76	1000
GSK1392956A	RIPK2	RIPK2	100	1000
GSK1392956A	RIPK4	RIPK4	84	1000
GSK1392956A	RIPK5	DSTYK	25	1000
GSK1392956A	ROCK1	ROCK1	87	1000
GSK1392956A	ROCK2	ROCK2	100	1000
GSK1392956A	ROS1	ROS1	52	1000
GSK1392956A	RPS6KA4(Kin.Dom.1-N-terminal)	RPS6KA4	100	1000
GSK1392956A	RPS6KA4(Kin.Dom.2-C-terminal)	RPS6KA4	33	1000
GSK1392956A	RPS6KA5(Kin.Dom.1-N-terminal)	RPS6KA5	100	1000
GSK1392956A	RPS6KA5(Kin.Dom.2-C-terminal)	RPS6KA5	47	1000
GSK1392956A	RSK1(Kin.Dom.1-N-terminal)	RPS6KA1	27	1000
GSK1392956A	RSK1(Kin.Dom.2-C-terminal)	RPS6KA1	78	1000
GSK1392956A	RSK2(Kin.Dom.1-N-terminal)	RPS6KA3	5.7	1000
GSK1392956A	RSK2(Kin.Dom.2-C-terminal)	RPS6KA3	100	1000
GSK1392956A	RSK3(Kin.Dom.1-N-terminal)	RPS6KA2	67	1000
GSK1392956A	RSK3(Kin.Dom.2-C-terminal)	RPS6KA2	72	1000
GSK1392956A	RSK4(Kin.Dom.1-N-terminal)	RPS6KA6	55	1000
GSK1392956A	RSK4(Kin.Dom.2-C-terminal)	RPS6KA6	86	1000
GSK1392956A	S6K1	RPS6KB1	94	1000
GSK1392956A	SBK1	SBK1	64	1000
GSK1392956A	SGK	SGK1	99	1000
GSK1392956A	SgK110	SgK110	100	1000
GSK1392956A	SGK2	SGK2	100	1000
GSK1392956A	SGK3	SGK3	91	1000
GSK1392956A	SIK	SIK1	100	1000
GSK1392956A	SIK2	SIK2	100	1000
GSK1392956A	SLK	SLK	100	1000
GSK1392956A	SNARK	NUAK2	66	1000
GSK1392956A	SNRK	SNRK	87	1000
GSK1392956A	SRC	SRC	100	1000
GSK1392956A	SRMS	SRMS	100	1000
GSK1392956A	SRPK1	SRPK1	99	1000
GSK1392956A	SRPK2	SRPK2	99	1000
GSK1392956A	SRPK3	SRPK3	100	1000
GSK1392956A	STK16	STK16	85	1000
GSK1392956A	STK33	STK33	1.5	1000
GSK1392956A	STK35	STK35	100	1000
GSK1392956A	STK36	STK36	100	1000
GSK1392956A	STK39	STK39	65	1000
GSK1392956A	SYK	SYK	92	1000
GSK1392956A	TAK1	MAP3K7	100	1000
GSK1392956A	TAOK1	TAOK1	67	1000
GSK1392956A	TAOK2	TAOK2	100	1000
GSK1392956A	TAOK3	TAOK3	100	1000
GSK1392956A	TBK1	TBK1	100	1000
GSK1392956A	TEC	TEC	100	1000
GSK1392956A	TESK1	TESK1	92	1000
GSK1392956A	TGFBR1	TGFBR1	100	1000
GSK1392956A	TGFBR2	TGFBR2	100	1000
GSK1392956A	TIE1	TIE1	100	1000
GSK1392956A	TIE2	TEK	100	1000
GSK1392956A	TLK1	TLK1	83	1000
GSK1392956A	TLK2	TLK2	92	1000
GSK1392956A	TNIK	TNIK	72	1000
GSK1392956A	TNK1	TNK1	18	1000
GSK1392956A	TNK2	TNK2	67	1000
GSK1392956A	TNNI3K	TNNI3K	100	1000
GSK1392956A	TRKA	NTRK1	86	1000
GSK1392956A	TRKB	NTRK2	91	1000
GSK1392956A	TRKC	NTRK3	89	1000
GSK1392956A	TRPM6	TRPM6	82	1000
GSK1392956A	TSSK1B	TSSK1B	42	1000
GSK1392956A	TSSK3	TSSK3	83	1000
GSK1392956A	TTK	TTK	4.9	1000
GSK1392956A	TXK	TXK	92	1000
GSK1392956A	TYK2(JH1domain-catalytic)	TYK2	100	1000
GSK1392956A	TYK2(JH2domain-pseudokinase)	TYK2	100	1000
GSK1392956A	TYRO3	TYRO3	74	1000
GSK1392956A	ULK1	ULK1	65	1000
GSK1392956A	ULK2	ULK2	77	1000
GSK1392956A	ULK3	ULK3	100	1000
GSK1392956A	VEGFR2	KDR	100	1000
GSK1392956A	VPS34	PIK3C3	82	1000
GSK1392956A	VRK2	VRK2	68	1000
GSK1392956A	WEE1	WEE1	96	1000
GSK1392956A	WEE2	WEE2	100	1000
GSK1392956A	WNK1	WNK1	92	1000
GSK1392956A	WNK2	WNK2	100	1000
GSK1392956A	WNK3	WNK3	100	1000
GSK1392956A	WNK4	WNK4	69	1000
GSK1392956A	YANK1	STK32A	100	1000
GSK1392956A	YANK2	STK32B	100	1000
GSK1392956A	YANK3	STK32C	100	1000
GSK1392956A	YES	YES1	99	1000
GSK1392956A	YSK1	STK25	89	1000
GSK1392956A	YSK4	MAP3K19	34	1000
GSK1392956A	ZAK	ZAK	93	1000
GSK1392956A	ZAP70	ZAP70	86	1000
GSK200398A	AAK1	AAK1	87	1000
GSK200398A	ABL1(E255K)-phosphorylated	ABL1	88	1000
GSK200398A	ABL1(F317I)-nonphosphorylated	ABL1	89	1000
GSK200398A	ABL1(F317I)-phosphorylated	ABL1	85	1000
GSK200398A	ABL1(F317L)-nonphosphorylated	ABL1	100	1000
GSK200398A	ABL1(F317L)-phosphorylated	ABL1	52	1000
GSK200398A	ABL1(H396P)-nonphosphorylated	ABL1	80	1000
GSK200398A	ABL1(H396P)-phosphorylated	ABL1	90	1000
GSK200398A	ABL1(M351T)-phosphorylated	ABL1	100	1000
GSK200398A	ABL1(Q252H)-nonphosphorylated	ABL1	84	1000
GSK200398A	ABL1(Q252H)-phosphorylated	ABL1	80	1000
GSK200398A	ABL1(T315I)-nonphosphorylated	ABL1	100	1000
GSK200398A	ABL1(T315I)-phosphorylated	ABL1	100	1000
GSK200398A	ABL1(Y253F)-phosphorylated	ABL1	78	1000
GSK200398A	ABL1-nonphosphorylated	ABL1	84	1000
GSK200398A	ABL1-phosphorylated	ABL1	76	1000
GSK200398A	ABL2	ABL2	100	1000
GSK200398A	ACVR1	ACVR1	100	1000
GSK200398A	ACVR1B	ACVR1B	100	1000
GSK200398A	ACVR2A	ACVR2A	100	1000
GSK200398A	ACVR2B	ACVR2B	100	1000
GSK200398A	ACVRL1	ACVRL1	82	1000
GSK200398A	ADCK3	CABC1	100	1000
GSK200398A	ADCK4	ADCK4	100	1000
GSK200398A	AKT1	AKT1	92	1000
GSK200398A	AKT2	AKT2	100	1000
GSK200398A	AKT3	AKT3	100	1000
GSK200398A	ALK	ALK	100	1000
GSK200398A	ALK(C1156Y)	ALK	94	1000
GSK200398A	ALK(L1196M)	ALK	88	1000
GSK200398A	AMPK-alpha1	PRKAA1	100	1000
GSK200398A	AMPK-alpha2	PRKAA2	92	1000
GSK200398A	ANKK1	ANKK1	100	1000
GSK200398A	ARK5	NUAK1	91	1000
GSK200398A	ASK1	MAP3K5	100	1000
GSK200398A	ASK2	MAP3K6	88	1000
GSK200398A	AURKA	AURKA	71	1000
GSK200398A	AURKB	AURKB	84	1000
GSK200398A	AURKC	AURKC	100	1000
GSK200398A	AXL	AXL	100	1000
GSK200398A	BIKE	BMP2K	100	1000
GSK200398A	BLK	BLK	100	1000
GSK200398A	BMPR1A	BMPR1A	96	1000
GSK200398A	BMPR1B	BMPR1B	90	1000
GSK200398A	BMPR2	BMPR2	99	1000
GSK200398A	BMX	BMX	98	1000
GSK200398A	BRAF	BRAF	91	1000
GSK200398A	BRAF(V600E)	BRAF	99	1000
GSK200398A	BRK	PTK6	78	1000
GSK200398A	BRSK1	BRSK1	100	1000
GSK200398A	BRSK2	BRSK2	100	1000
GSK200398A	BTK	BTK	77	1000
GSK200398A	BUB1	BUB1	45	1000
GSK200398A	CAMK1	CAMK1	100	1000
GSK200398A	CAMK1B	PNCK	69	1000
GSK200398A	CAMK1D	CAMK1D	100	1000
GSK200398A	CAMK1G	CAMK1G	100	1000
GSK200398A	CAMK2A	CAMK2A	94	1000
GSK200398A	CAMK2B	CAMK2B	84	1000
GSK200398A	CAMK2D	CAMK2D	95	1000
GSK200398A	CAMK2G	CAMK2G	96	1000
GSK200398A	CAMK4	CAMK4	100	1000
GSK200398A	CAMKK1	CAMKK1	87	1000
GSK200398A	CAMKK2	CAMKK2	86	1000
GSK200398A	CASK	CASK	100	1000
GSK200398A	CDC2L1	CDK11B	87	1000
GSK200398A	CDC2L2	CDC2L2	100	1000
GSK200398A	CDC2L5	CDK13	97	1000
GSK200398A	CDK11	CDK19	92	1000
GSK200398A	CDK2	CDK2	97	1000
GSK200398A	CDK3	CDK3	100	1000
GSK200398A	CDK4	CDK4	100	1000
GSK200398A	CDK4-cyclinD1	CDK4	68	1000
GSK200398A	CDK4-cyclinD3	CDK4	100	1000
GSK200398A	CDK5	CDK5	100	1000
GSK200398A	CDK7	CDK7	78	1000
GSK200398A	CDK8	CDK8	84	1000
GSK200398A	CDK9	CDK9	87	1000
GSK200398A	CDKL1	CDKL1	88	1000
GSK200398A	CDKL2	CDKL2	92	1000
GSK200398A	CDKL3	CDKL3	100	1000
GSK200398A	CDKL5	CDKL5	40	1000
GSK200398A	CHEK1	CHEK1	100	1000
GSK200398A	CHEK2	CHEK2	24	1000
GSK200398A	CIT	CIT	77	1000
GSK200398A	CLK1	CLK1	83	1000
GSK200398A	CLK2	CLK2	100	1000
GSK200398A	CLK3	CLK3	90	1000
GSK200398A	CLK4	CLK4	100	1000
GSK200398A	CSF1R	CSF1R	100	1000
GSK200398A	CSF1R-autoinhibited	CSF1R	87	1000
GSK200398A	CSK	CSK	67	1000
GSK200398A	CSNK1A1	CSNK1A1	89	1000
GSK200398A	CSNK1A1L	CSNK1A1L	92	1000
GSK200398A	CSNK1D	CSNK1D	91	1000
GSK200398A	CSNK1E	CSNK1E	79	1000
GSK200398A	CSNK1G1	CSNK1G1	92	1000
GSK200398A	CSNK1G2	CSNK1G2	100	1000
GSK200398A	CSNK1G3	CSNK1G3	92	1000
GSK200398A	CSNK2A1	CSNK2A1	75	1000
GSK200398A	CSNK2A2	CSNK2A2	70	1000
GSK200398A	CTK	MATK	89	1000
GSK200398A	DAPK1	DAPK1	95	1000
GSK200398A	DAPK2	DAPK2	100	1000
GSK200398A	DAPK3	DAPK3	100	1000
GSK200398A	DCAMKL1	DCLK1	82	1000
GSK200398A	DCAMKL2	DCLK2	100	1000
GSK200398A	DCAMKL3	DCLK3	100	1000
GSK200398A	DDR1	DDR1	92	1000
GSK200398A	DDR2	DDR2	100	1000
GSK200398A	DLK	MAP3K12	71	1000
GSK200398A	DMPK	DMPK	100	1000
GSK200398A	DMPK2	CDC42BPG	100	1000
GSK200398A	DRAK1	STK17A	89	1000
GSK200398A	DRAK2	STK17B	99	1000
GSK200398A	DYRK1A	DYRK1A	76	1000
GSK200398A	DYRK1B	DYRK1B	100	1000
GSK200398A	DYRK2	DYRK2	84	1000
GSK200398A	EGFR	EGFR	25	1000
GSK200398A	EGFR(E746-A750del)	EGFR	38	1000
GSK200398A	EGFR(G719C)	EGFR	0.1	1000
GSK200398A	EGFR(G719S)	EGFR	2	1000
GSK200398A	EGFR(L747-E749del, A750P)	EGFR	66	1000
GSK200398A	EGFR(L747-S752del, P753S)	EGFR	20	1000
GSK200398A	EGFR(L747-T751del,Sins)	EGFR	24	1000
GSK200398A	EGFR(L858R)	EGFR	9.2	1000
GSK200398A	EGFR(L858R,T790M)	EGFR	87	1000
GSK200398A	EGFR(L861Q)	EGFR	0.3	1000
GSK200398A	EGFR(S752-I759del)	EGFR	3.1	1000
GSK200398A	EGFR(T790M)	EGFR	44	1000
GSK200398A	EIF2AK1	EIF2AK1	100	1000
GSK200398A	EPHA1	EPHA1	87	1000
GSK200398A	EPHA2	EPHA2	96	1000
GSK200398A	EPHA3	EPHA3	94	1000
GSK200398A	EPHA4	EPHA4	96	1000
GSK200398A	EPHA5	EPHA5	100	1000
GSK200398A	EPHA6	EPHA6	95	1000
GSK200398A	EPHA7	EPHA7	100	1000
GSK200398A	EPHA8	EPHA8	100	1000
GSK200398A	EPHB1	EPHB1	100	1000
GSK200398A	EPHB2	EPHB2	100	1000
GSK200398A	EPHB3	EPHB3	100	1000
GSK200398A	EPHB4	EPHB4	96	1000
GSK200398A	EPHB6	EPHB6	100	1000
GSK200398A	ERBB2	ERBB2	0	1000
GSK200398A	ERBB3	ERBB3	10	1000
GSK200398A	ERBB4	ERBB4	0	1000
GSK200398A	ERK1	MAPK3	100	1000
GSK200398A	ERK2	MAPK1	100	1000
GSK200398A	ERK3	MAPK6	100	1000
GSK200398A	ERK4	MAPK4	99	1000
GSK200398A	ERK5	MAPK7	89	1000
GSK200398A	ERK8	MAPK15	90	1000
GSK200398A	ERN1	ERN1	88	1000
GSK200398A	FAK	PTK2	96	1000
GSK200398A	FER	FER	94	1000
GSK200398A	FES	FES	95	1000
GSK200398A	FGFR1	FGFR1	100	1000
GSK200398A	FGFR2	FGFR2	100	1000
GSK200398A	FGFR3	FGFR3	100	1000
GSK200398A	FGFR3(G697C)	FGFR3	86	1000
GSK200398A	FGFR4	FGFR4	89	1000
GSK200398A	FGR	FGR	96	1000
GSK200398A	FLT1	FLT1	99	1000
GSK200398A	FLT3	FLT3	77	1000
GSK200398A	FLT3(D835H)	FLT3	96	1000
GSK200398A	FLT3(D835V)	FLT3	87	1000
GSK200398A	FLT3(D835Y)	FLT3	89	1000
GSK200398A	FLT3(ITD)	FLT3	98	1000
GSK200398A	FLT3(ITD,D835V)	FLT3	88	1000
GSK200398A	FLT3(ITD,F691L)	FLT3	92	1000
GSK200398A	FLT3(K663Q)	FLT3	66	1000
GSK200398A	FLT3(N841I)	FLT3	100	1000
GSK200398A	FLT3(R834Q)	FLT3	92	1000
GSK200398A	FLT3-autoinhibited	FLT3	89	1000
GSK200398A	FLT4	FLT4	100	1000
GSK200398A	FRK	FRK	90	1000
GSK200398A	FYN	FYN	81	1000
GSK200398A	GAK	GAK	88	1000
GSK200398A	GCN2(Kin.Dom.2,S808G)	EIF2AK4	44	1000
GSK200398A	GRK1	GRK1	86	1000
GSK200398A	GRK2	ADRBK1	100	1000
GSK200398A	GRK3	ADRBK2	80	1000
GSK200398A	GRK4	GRK4	100	1000
GSK200398A	GRK7	GRK7	84	1000
GSK200398A	GSK3A	GSK3A	93	1000
GSK200398A	GSK3B	GSK3B	90	1000
GSK200398A	HASPIN	GSG2	93	1000
GSK200398A	HCK	HCK	100	1000
GSK200398A	HIPK1	HIPK1	91	1000
GSK200398A	HIPK2	HIPK2	77	1000
GSK200398A	HIPK3	HIPK3	92	1000
GSK200398A	HIPK4	HIPK4	92	1000
GSK200398A	HPK1	MAP4K1	100	1000
GSK200398A	HUNK	HUNK	100	1000
GSK200398A	ICK	ICK	96	1000
GSK200398A	IGF1R	IGF1R	97	1000
GSK200398A	IKK-alpha	CHUK	100	1000
GSK200398A	IKK-beta	IKBKB	100	1000
GSK200398A	IKK-epsilon	IKBKE	100	1000
GSK200398A	INSR	INSR	77	1000
GSK200398A	INSRR	INSRR	100	1000
GSK200398A	IRAK1	IRAK1	100	1000
GSK200398A	IRAK3	IRAK3	77	1000
GSK200398A	IRAK4	IRAK4	96	1000
GSK200398A	ITK	ITK	100	1000
GSK200398A	JAK1(JH1domain-catalytic)	JAK1	96	1000
GSK200398A	JAK1(JH2domain-pseudokinase)	JAK1	91	1000
GSK200398A	JAK2(JH1domain-catalytic)	JAK2	99	1000
GSK200398A	JAK3(JH1domain-catalytic)	JAK3	90	1000
GSK200398A	JNK1	MAPK8	90	1000
GSK200398A	JNK2	MAPK9	91	1000
GSK200398A	JNK3	MAPK10	88	1000
GSK200398A	KIT	KIT	100	1000
GSK200398A	KIT(A829P)	KIT	100	1000
GSK200398A	KIT(D816H)	KIT	69	1000
GSK200398A	KIT(D816V)	KIT	100	1000
GSK200398A	KIT(L576P)	KIT	100	1000
GSK200398A	KIT(V559D)	KIT	100	1000
GSK200398A	KIT(V559D,T670I)	KIT	87	1000
GSK200398A	KIT(V559D,V654A)	KIT	100	1000
GSK200398A	KIT-autoinhibited	KIT	96	1000
GSK200398A	LATS1	LATS1	100	1000
GSK200398A	LATS2	LATS2	100	1000
GSK200398A	LCK	LCK	81	1000
GSK200398A	LIMK1	LIMK1	100	1000
GSK200398A	LIMK2	LIMK2	100	1000
GSK200398A	LKB1	STK11	100	1000
GSK200398A	LOK	STK10	63	1000
GSK200398A	LRRK2	LRRK2	97	1000
GSK200398A	LRRK2(G2019S)	LRRK2	84	1000
GSK200398A	LTK	LTK	85	1000
GSK200398A	LYN	LYN	76	1000
GSK200398A	LZK	MAP3K13	100	1000
GSK200398A	MAK	MAK	100	1000
GSK200398A	MAP3K1	MAP3K1	56	1000
GSK200398A	MAP3K15	MAP3K15	95	1000
GSK200398A	MAP3K2	MAP3K2	97	1000
GSK200398A	MAP3K3	MAP3K3	89	1000
GSK200398A	MAP3K4	MAP3K4	82	1000
GSK200398A	MAP4K2	MAP4K2	98	1000
GSK200398A	MAP4K3	MAP4K3	100	1000
GSK200398A	MAP4K4	MAP4K4	83	1000
GSK200398A	MAP4K5	MAP4K5	92	1000
GSK200398A	MAPKAPK2	MAPKAPK2	72	1000
GSK200398A	MAPKAPK5	MAPKAPK5	90	1000
GSK200398A	MARK1	MARK1	100	1000
GSK200398A	MARK2	MARK2	87	1000
GSK200398A	MARK3	MARK3	83	1000
GSK200398A	MARK4	MARK4	100	1000
GSK200398A	MAST1	MAST1	44	1000
GSK200398A	MEK1	MAP2K1	69	1000
GSK200398A	MEK2	MAP2K2	79	1000
GSK200398A	MEK3	MAP2K3	78	1000
GSK200398A	MEK4	MAP2K4	97	1000
GSK200398A	MEK5	MAP2K5	0.4	1000
GSK200398A	MEK6	MAP2K6	71	1000
GSK200398A	MELK	MELK	86	1000
GSK200398A	MERTK	MERTK	100	1000
GSK200398A	MET	MET	100	1000
GSK200398A	MET(M1250T)	MET	86	1000
GSK200398A	MET(Y1235D)	MET	100	1000
GSK200398A	MINK	MINK1	98	1000
GSK200398A	MKK7	MAP2K7	75	1000
GSK200398A	MKNK1	MKNK1	70	1000
GSK200398A	MKNK2	MKNK2	47	1000
GSK200398A	MLCK	MYLK3	100	1000
GSK200398A	MLK1	MAP3K9	100	1000
GSK200398A	MLK2	MAP3K10	100	1000
GSK200398A	MLK3	MAP3K11	92	1000
GSK200398A	MRCKA	CDC42BPA	100	1000
GSK200398A	MRCKB	CDC42BPB	86	1000
GSK200398A	MST1	STK4	100	1000
GSK200398A	MST1R	MST1R	100	1000
GSK200398A	MST2	STK3	100	1000
GSK200398A	MST3	STK24	83	1000
GSK200398A	MST4	MST4	100	1000
GSK200398A	MTOR	MTOR	100	1000
GSK200398A	MUSK	MUSK	100	1000
GSK200398A	MYLK	MYLK	100	1000
GSK200398A	MYLK2	MYLK2	100	1000
GSK200398A	MYLK4	MYLK4	91	1000
GSK200398A	MYO3A	MYO3A	100	1000
GSK200398A	MYO3B	MYO3B	100	1000
GSK200398A	NDR1	STK38	100	1000
GSK200398A	NDR2	STK38L	100	1000
GSK200398A	NEK1	NEK1	68	1000
GSK200398A	NEK10	NEK10	96	1000
GSK200398A	NEK11	NEK11	100	1000
GSK200398A	NEK2	NEK2	72	1000
GSK200398A	NEK3	NEK3	94	1000
GSK200398A	NEK4	NEK4	100	1000
GSK200398A	NEK5	NEK5	100	1000
GSK200398A	NEK6	NEK6	100	1000
GSK200398A	NEK7	NEK7	98	1000
GSK200398A	NEK9	NEK9	95	1000
GSK200398A	NIK	MAP3K14	100	1000
GSK200398A	NIM1	MGC42105	89	1000
GSK200398A	NLK	NLK	93	1000
GSK200398A	OSR1	OXSR1	100	1000
GSK200398A	p38-alpha	MAPK14	100	1000
GSK200398A	p38-beta	MAPK11	100	1000
GSK200398A	p38-delta	MAPK13	100	1000
GSK200398A	p38-gamma	MAPK12	100	1000
GSK200398A	PAK1	PAK1	100	1000
GSK200398A	PAK2	PAK2	100	1000
GSK200398A	PAK3	PAK3	63	1000
GSK200398A	PAK4	PAK4	100	1000
GSK200398A	PAK6	PAK6	100	1000
GSK200398A	PAK7	PAK7	89	1000
GSK200398A	PCTK1	CDK16	83	1000
GSK200398A	PCTK2	CDK17	96	1000
GSK200398A	PCTK3	CDK18	100	1000
GSK200398A	PDGFRA	PDGFRA	83	1000
GSK200398A	PDGFRB	PDGFRB	100	1000
GSK200398A	PDPK1	PDPK1	89	1000
GSK200398A	PFCDPK1(P.falciparum)	CDPK1	88	1000
GSK200398A	PFPK5(P.falciparum)	MAL13P1.279	100	1000
GSK200398A	PFTAIRE2	CDK15	91	1000
GSK200398A	PFTK1	CDK14	100	1000
GSK200398A	PHKG1	PHKG1	96	1000
GSK200398A	PHKG2	PHKG2	98	1000
GSK200398A	PIK3C2B	PIK3C2B	88	1000
GSK200398A	PIK3C2G	PIK3C2G	84	1000
GSK200398A	PIK3CA	PIK3CA	100	1000
GSK200398A	PIK3CA(C420R)	PIK3CA	100	1000
GSK200398A	PIK3CA(E542K)	PIK3CA	100	1000
GSK200398A	PIK3CA(E545A)	PIK3CA	100	1000
GSK200398A	PIK3CA(E545K)	PIK3CA	85	1000
GSK200398A	PIK3CA(H1047L)	PIK3CA	100	1000
GSK200398A	PIK3CA(H1047Y)	PIK3CA	100	1000
GSK200398A	PIK3CA(I800L)	PIK3CA	83	1000
GSK200398A	PIK3CA(M1043I)	PIK3CA	100	1000
GSK200398A	PIK3CA(Q546K)	PIK3CA	98	1000
GSK200398A	PIK3CB	PIK3CB	100	1000
GSK200398A	PIK3CD	PIK3CD	100	1000
GSK200398A	PIK3CG	PIK3CG	100	1000
GSK200398A	PIK4CB	PI4KB	100	1000
GSK200398A	PIKFYVE	PIKFYVE	100	1000
GSK200398A	PIM1	PIM1	100	1000
GSK200398A	PIM2	PIM2	100	1000
GSK200398A	PIM3	PIM3	100	1000
GSK200398A	PIP5K1A	PIP5K1A	100	1000
GSK200398A	PIP5K1C	PIP5K1C	99	1000
GSK200398A	PIP5K2B	PIP4K2B	100	1000
GSK200398A	PIP5K2C	PIP4K2C	98	1000
GSK200398A	PKAC-alpha	PRKACA	100	1000
GSK200398A	PKAC-beta	PRKACB	93	1000
GSK200398A	PKMYT1	PKMYT1	96	1000
GSK200398A	PKN1	PKN1	88	1000
GSK200398A	PKN2	PKN2	69	1000
GSK200398A	PKNB(M.tuberculosis)	pknB	91	1000
GSK200398A	PLK1	PLK1	76	1000
GSK200398A	PLK2	PLK2	92	1000
GSK200398A	PLK3	PLK3	91	1000
GSK200398A	PLK4	PLK4	69	1000
GSK200398A	PRKCD	PRKCD	100	1000
GSK200398A	PRKCE	PRKCE	88	1000
GSK200398A	PRKCH	PRKCH	100	1000
GSK200398A	PRKCI	PRKCI	100	1000
GSK200398A	PRKCQ	PRKCQ	64	1000
GSK200398A	PRKD1	PRKD1	100	1000
GSK200398A	PRKD2	PRKD2	93	1000
GSK200398A	PRKD3	PRKD3	100	1000
GSK200398A	PRKG1	PRKG1	95	1000
GSK200398A	PRKG2	PRKG2	100	1000
GSK200398A	PRKR	EIF2AK2	65	1000
GSK200398A	PRKX	PRKX	77	1000
GSK200398A	PRP4	PRPF4B	100	1000
GSK200398A	PYK2	PTK2B	99	1000
GSK200398A	QSK	KIAA0999	100	1000
GSK200398A	RAF1	RAF1	88	1000
GSK200398A	RET	RET	100	1000
GSK200398A	RET(M918T)	RET	100	1000
GSK200398A	RET(V804L)	RET	100	1000
GSK200398A	RET(V804M)	RET	100	1000
GSK200398A	RIOK1	RIOK1	100	1000
GSK200398A	RIOK2	RIOK2	100	1000
GSK200398A	RIOK3	RIOK3	100	1000
GSK200398A	RIPK1	RIPK1	100	1000
GSK200398A	RIPK2	RIPK2	16	1000
GSK200398A	RIPK4	RIPK4	84	1000
GSK200398A	RIPK5	DSTYK	100	1000
GSK200398A	ROCK1	ROCK1	96	1000
GSK200398A	ROCK2	ROCK2	84	1000
GSK200398A	ROS1	ROS1	73	1000
GSK200398A	RPS6KA4(Kin.Dom.1-N-terminal)	RPS6KA4	97	1000
GSK200398A	RPS6KA4(Kin.Dom.2-C-terminal)	RPS6KA4	88	1000
GSK200398A	RPS6KA5(Kin.Dom.1-N-terminal)	RPS6KA5	100	1000
GSK200398A	RPS6KA5(Kin.Dom.2-C-terminal)	RPS6KA5	100	1000
GSK200398A	RSK1(Kin.Dom.1-N-terminal)	RPS6KA1	96	1000
GSK200398A	RSK1(Kin.Dom.2-C-terminal)	RPS6KA1	97	1000
GSK200398A	RSK2(Kin.Dom.1-N-terminal)	RPS6KA3	95	1000
GSK200398A	RSK2(Kin.Dom.2-C-terminal)	RPS6KA3	93	1000
GSK200398A	RSK3(Kin.Dom.1-N-terminal)	RPS6KA2	92	1000
GSK200398A	RSK3(Kin.Dom.2-C-terminal)	RPS6KA2	89	1000
GSK200398A	RSK4(Kin.Dom.1-N-terminal)	RPS6KA6	80	1000
GSK200398A	RSK4(Kin.Dom.2-C-terminal)	RPS6KA6	83	1000
GSK200398A	S6K1	RPS6KB1	100	1000
GSK200398A	SBK1	SBK1	100	1000
GSK200398A	SGK	SGK1	99	1000
GSK200398A	SgK110	SgK110	100	1000
GSK200398A	SGK2	SGK2	97	1000
GSK200398A	SGK3	SGK3	99	1000
GSK200398A	SIK	SIK1	100	1000
GSK200398A	SIK2	SIK2	69	1000
GSK200398A	SLK	SLK	98	1000
GSK200398A	SNARK	NUAK2	100	1000
GSK200398A	SNRK	SNRK	100	1000
GSK200398A	SRC	SRC	100	1000
GSK200398A	SRMS	SRMS	92	1000
GSK200398A	SRPK1	SRPK1	84	1000
GSK200398A	SRPK2	SRPK2	85	1000
GSK200398A	SRPK3	SRPK3	100	1000
GSK200398A	STK16	STK16	100	1000
GSK200398A	STK33	STK33	90	1000
GSK200398A	STK35	STK35	99	1000
GSK200398A	STK36	STK36	100	1000
GSK200398A	STK39	STK39	83	1000
GSK200398A	SYK	SYK	91	1000
GSK200398A	TAK1	MAP3K7	100	1000
GSK200398A	TAOK1	TAOK1	91	1000
GSK200398A	TAOK2	TAOK2	97	1000
GSK200398A	TAOK3	TAOK3	100	1000
GSK200398A	TBK1	TBK1	100	1000
GSK200398A	TEC	TEC	100	1000
GSK200398A	TESK1	TESK1	96	1000
GSK200398A	TGFBR1	TGFBR1	97	1000
GSK200398A	TGFBR2	TGFBR2	100	1000
GSK200398A	TIE1	TIE1	100	1000
GSK200398A	TIE2	TEK	100	1000
GSK200398A	TLK1	TLK1	80	1000
GSK200398A	TLK2	TLK2	72	1000
GSK200398A	TNIK	TNIK	96	1000
GSK200398A	TNK1	TNK1	99	1000
GSK200398A	TNK2	TNK2	97	1000
GSK200398A	TNNI3K	TNNI3K	55	1000
GSK200398A	TRKA	NTRK1	70	1000
GSK200398A	TRKB	NTRK2	87	1000
GSK200398A	TRKC	NTRK3	95	1000
GSK200398A	TRPM6	TRPM6	96	1000
GSK200398A	TSSK1B	TSSK1B	100	1000
GSK200398A	TSSK3	TSSK3	93	1000
GSK200398A	TTK	TTK	100	1000
GSK200398A	TXK	TXK	83	1000
GSK200398A	TYK2(JH1domain-catalytic)	TYK2	100	1000
GSK200398A	TYK2(JH2domain-pseudokinase)	TYK2	97	1000
GSK200398A	TYRO3	TYRO3	100	1000
GSK200398A	ULK1	ULK1	62	1000
GSK200398A	ULK2	ULK2	86	1000
GSK200398A	ULK3	ULK3	91	1000
GSK200398A	VEGFR2	KDR	89	1000
GSK200398A	VPS34	PIK3C3	98	1000
GSK200398A	VRK2	VRK2	87	1000
GSK200398A	WEE1	WEE1	89	1000
GSK200398A	WEE2	WEE2	96	1000
GSK200398A	WNK1	WNK1	80	1000
GSK200398A	WNK2	WNK2	94	1000
GSK200398A	WNK3	WNK3	100	1000
GSK200398A	WNK4	WNK4	95	1000
GSK200398A	YANK1	STK32A	100	1000
GSK200398A	YANK2	STK32B	100	1000
GSK200398A	YANK3	STK32C	100	1000
GSK200398A	YES	YES1	98	1000
GSK200398A	YSK1	STK25	79	1000
GSK200398A	YSK4	MAP3K19	83	1000
GSK200398A	ZAK	ZAK	82	1000
GSK200398A	ZAP70	ZAP70	89	1000
GSK2219385	AAK1	AAK1	94	1000
GSK2219385	ABL1(E255K)-phosphorylated	ABL1	95	1000
GSK2219385	ABL1(F317I)-nonphosphorylated	ABL1	55	1000
GSK2219385	ABL1(F317I)-phosphorylated	ABL1	97	1000
GSK2219385	ABL1(F317L)-nonphosphorylated	ABL1	100	1000
GSK2219385	ABL1(F317L)-phosphorylated	ABL1	56	1000
GSK2219385	ABL1(H396P)-nonphosphorylated	ABL1	51	1000
GSK2219385	ABL1(H396P)-phosphorylated	ABL1	99	1000
GSK2219385	ABL1(M351T)-phosphorylated	ABL1	100	1000
GSK2219385	ABL1(Q252H)-nonphosphorylated	ABL1	62	1000
GSK2219385	ABL1(Q252H)-phosphorylated	ABL1	95	1000
GSK2219385	ABL1(T315I)-nonphosphorylated	ABL1	65	1000
GSK2219385	ABL1(T315I)-phosphorylated	ABL1	100	1000
GSK2219385	ABL1(Y253F)-phosphorylated	ABL1	100	1000
GSK2219385	ABL1-nonphosphorylated	ABL1	69	1000
GSK2219385	ABL1-phosphorylated	ABL1	87	1000
GSK2219385	ABL2	ABL2	100	1000
GSK2219385	ACVR1	ACVR1	96	1000
GSK2219385	ACVR1B	ACVR1B	100	1000
GSK2219385	ACVR2A	ACVR2A	100	1000
GSK2219385	ACVR2B	ACVR2B	100	1000
GSK2219385	ACVRL1	ACVRL1	100	1000
GSK2219385	ADCK3	CABC1	80	1000
GSK2219385	ADCK4	ADCK4	100	1000
GSK2219385	AKT1	AKT1	98	1000
GSK2219385	AKT2	AKT2	85	1000
GSK2219385	AKT3	AKT3	100	1000
GSK2219385	ALK	ALK	1.7	1000
GSK2219385	ALK(C1156Y)	ALK	4.5	1000
GSK2219385	ALK(L1196M)	ALK	13	1000
GSK2219385	AMPK-alpha1	PRKAA1	100	1000
GSK2219385	AMPK-alpha2	PRKAA2	100	1000
GSK2219385	ANKK1	ANKK1	94	1000
GSK2219385	ARK5	NUAK1	86	1000
GSK2219385	ASK1	MAP3K5	100	1000
GSK2219385	ASK2	MAP3K6	70	1000
GSK2219385	AURKA	AURKA	85	1000
GSK2219385	AURKB	AURKB	93	1000
GSK2219385	AURKC	AURKC	90	1000
GSK2219385	AXL	AXL	76	1000
GSK2219385	BIKE	BMP2K	77	1000
GSK2219385	BLK	BLK	100	1000
GSK2219385	BMPR1A	BMPR1A	93	1000
GSK2219385	BMPR1B	BMPR1B	95	1000
GSK2219385	BMPR2	BMPR2	91	1000
GSK2219385	BMX	BMX	92	1000
GSK2219385	BRAF	BRAF	72	1000
GSK2219385	BRAF(V600E)	BRAF	82	1000
GSK2219385	BRK	PTK6	100	1000
GSK2219385	BRSK1	BRSK1	100	1000
GSK2219385	BRSK2	BRSK2	93	1000
GSK2219385	BTK	BTK	100	1000
GSK2219385	BUB1	BUB1	90	1000
GSK2219385	CAMK1	CAMK1	97	1000
GSK2219385	CAMK1B	PNCK	85	1000
GSK2219385	CAMK1D	CAMK1D	87	1000
GSK2219385	CAMK1G	CAMK1G	95	1000
GSK2219385	CAMK2A	CAMK2A	89	1000
GSK2219385	CAMK2B	CAMK2B	93	1000
GSK2219385	CAMK2D	CAMK2D	82	1000
GSK2219385	CAMK2G	CAMK2G	98	1000
GSK2219385	CAMK4	CAMK4	80	1000
GSK2219385	CAMKK1	CAMKK1	97	1000
GSK2219385	CAMKK2	CAMKK2	94	1000
GSK2219385	CASK	CASK	100	1000
GSK2219385	CDC2L1	CDK11B	100	1000
GSK2219385	CDC2L2	CDC2L2	100	1000
GSK2219385	CDC2L5	CDK13	50	1000
GSK2219385	CDK11	CDK19	92	1000
GSK2219385	CDK2	CDK2	100	1000
GSK2219385	CDK3	CDK3	92	1000
GSK2219385	CDK4	CDK4	90	1000
GSK2219385	CDK4-cyclinD1	CDK4	89	1000
GSK2219385	CDK4-cyclinD3	CDK4	100	1000
GSK2219385	CDK5	CDK5	100	1000
GSK2219385	CDK7	CDK7	73	1000
GSK2219385	CDK8	CDK8	100	1000
GSK2219385	CDK9	CDK9	100	1000
GSK2219385	CDKL1	CDKL1	79	1000
GSK2219385	CDKL2	CDKL2	100	1000
GSK2219385	CDKL3	CDKL3	100	1000
GSK2219385	CDKL5	CDKL5	44	1000
GSK2219385	CHEK1	CHEK1	92	1000
GSK2219385	CHEK2	CHEK2	69	1000
GSK2219385	CIT	CIT	100	1000
GSK2219385	CLK1	CLK1	54	1000
GSK2219385	CLK2	CLK2	58	1000
GSK2219385	CLK3	CLK3	91	1000
GSK2219385	CLK4	CLK4	67	1000
GSK2219385	CSF1R	CSF1R	100	1000
GSK2219385	CSF1R-autoinhibited	CSF1R	100	1000
GSK2219385	CSK	CSK	95	1000
GSK2219385	CSNK1A1	CSNK1A1	47	1000
GSK2219385	CSNK1A1L	CSNK1A1L	67	1000
GSK2219385	CSNK1D	CSNK1D	23	1000
GSK2219385	CSNK1E	CSNK1E	23	1000
GSK2219385	CSNK1G1	CSNK1G1	54	1000
GSK2219385	CSNK1G2	CSNK1G2	11	1000
GSK2219385	CSNK1G3	CSNK1G3	28	1000
GSK2219385	CSNK2A1	CSNK2A1	78	1000
GSK2219385	CSNK2A2	CSNK2A2	81	1000
GSK2219385	CTK	MATK	100	1000
GSK2219385	DAPK1	DAPK1	85	1000
GSK2219385	DAPK2	DAPK2	73	1000
GSK2219385	DAPK3	DAPK3	71	1000
GSK2219385	DCAMKL1	DCLK1	78	1000
GSK2219385	DCAMKL2	DCLK2	100	1000
GSK2219385	DCAMKL3	DCLK3	100	1000
GSK2219385	DDR1	DDR1	78	1000
GSK2219385	DDR2	DDR2	100	1000
GSK2219385	DLK	MAP3K12	80	1000
GSK2219385	DMPK	DMPK	84	1000
GSK2219385	DMPK2	CDC42BPG	99	1000
GSK2219385	DRAK1	STK17A	88	1000
GSK2219385	DRAK2	STK17B	83	1000
GSK2219385	DYRK1A	DYRK1A	60	1000
GSK2219385	DYRK1B	DYRK1B	100	1000
GSK2219385	DYRK2	DYRK2	100	1000
GSK2219385	EGFR	EGFR	87	1000
GSK2219385	EGFR(E746-A750del)	EGFR	100	1000
GSK2219385	EGFR(G719C)	EGFR	98	1000
GSK2219385	EGFR(G719S)	EGFR	75	1000
GSK2219385	EGFR(L747-E749del, A750P)	EGFR	98	1000
GSK2219385	EGFR(L747-S752del, P753S)	EGFR	100	1000
GSK2219385	EGFR(L747-T751del,Sins)	EGFR	100	1000
GSK2219385	EGFR(L858R)	EGFR	89	1000
GSK2219385	EGFR(L858R,T790M)	EGFR	100	1000
GSK2219385	EGFR(L861Q)	EGFR	82	1000
GSK2219385	EGFR(S752-I759del)	EGFR	100	1000
GSK2219385	EGFR(T790M)	EGFR	56	1000
GSK2219385	EIF2AK1	EIF2AK1	100	1000
GSK2219385	EPHA1	EPHA1	93	1000
GSK2219385	EPHA2	EPHA2	86	1000
GSK2219385	EPHA3	EPHA3	100	1000
GSK2219385	EPHA4	EPHA4	95	1000
GSK2219385	EPHA5	EPHA5	100	1000
GSK2219385	EPHA6	EPHA6	100	1000
GSK2219385	EPHA7	EPHA7	100	1000
GSK2219385	EPHA8	EPHA8	94	1000
GSK2219385	EPHB1	EPHB1	99	1000
GSK2219385	EPHB2	EPHB2	100	1000
GSK2219385	EPHB3	EPHB3	93	1000
GSK2219385	EPHB4	EPHB4	100	1000
GSK2219385	EPHB6	EPHB6	74	1000
GSK2219385	ERBB2	ERBB2	94	1000
GSK2219385	ERBB3	ERBB3	57	1000
GSK2219385	ERBB4	ERBB4	86	1000
GSK2219385	ERK1	MAPK3	65	1000
GSK2219385	ERK2	MAPK1	100	1000
GSK2219385	ERK3	MAPK6	90	1000
GSK2219385	ERK4	MAPK4	92	1000
GSK2219385	ERK5	MAPK7	100	1000
GSK2219385	ERK8	MAPK15	95	1000
GSK2219385	ERN1	ERN1	100	1000
GSK2219385	FAK	PTK2	100	1000
GSK2219385	FER	FER	91	1000
GSK2219385	FES	FES	97	1000
GSK2219385	FGFR1	FGFR1	100	1000
GSK2219385	FGFR2	FGFR2	82	1000
GSK2219385	FGFR3	FGFR3	78	1000
GSK2219385	FGFR3(G697C)	FGFR3	88	1000
GSK2219385	FGFR4	FGFR4	96	1000
GSK2219385	FGR	FGR	100	1000
GSK2219385	FLT1	FLT1	96	1000
GSK2219385	FLT3	FLT3	91	1000
GSK2219385	FLT3(D835H)	FLT3	85	1000
GSK2219385	FLT3(D835V)	FLT3	76	1000
GSK2219385	FLT3(D835Y)	FLT3	91	1000
GSK2219385	FLT3(ITD)	FLT3	82	1000
GSK2219385	FLT3(ITD,D835V)	FLT3	88	1000
GSK2219385	FLT3(ITD,F691L)	FLT3	100	1000
GSK2219385	FLT3(K663Q)	FLT3	100	1000
GSK2219385	FLT3(N841I)	FLT3	93	1000
GSK2219385	FLT3(R834Q)	FLT3	100	1000
GSK2219385	FLT3-autoinhibited	FLT3	100	1000
GSK2219385	FLT4	FLT4	100	1000
GSK2219385	FRK	FRK	100	1000
GSK2219385	FYN	FYN	100	1000
GSK2219385	GAK	GAK	56	1000
GSK2219385	GCN2(Kin.Dom.2,S808G)	EIF2AK4	100	1000
GSK2219385	GRK1	GRK1	69	1000
GSK2219385	GRK2	ADRBK1	100	1000
GSK2219385	GRK3	ADRBK2	80	1000
GSK2219385	GRK4	GRK4	100	1000
GSK2219385	GRK7	GRK7	70	1000
GSK2219385	GSK3A	GSK3A	100	1000
GSK2219385	GSK3B	GSK3B	100	1000
GSK2219385	HASPIN	GSG2	41	1000
GSK2219385	HCK	HCK	100	1000
GSK2219385	HIPK1	HIPK1	71	1000
GSK2219385	HIPK2	HIPK2	100	1000
GSK2219385	HIPK3	HIPK3	100	1000
GSK2219385	HIPK4	HIPK4	100	1000
GSK2219385	HPK1	MAP4K1	100	1000
GSK2219385	HUNK	HUNK	100	1000
GSK2219385	ICK	ICK	89	1000
GSK2219385	IGF1R	IGF1R	7.7	1000
GSK2219385	IKK-alpha	CHUK	100	1000
GSK2219385	IKK-beta	IKBKB	100	1000
GSK2219385	IKK-epsilon	IKBKE	61	1000
GSK2219385	INSR	INSR	4.3	1000
GSK2219385	INSRR	INSRR	2.9	1000
GSK2219385	IRAK1	IRAK1	95	1000
GSK2219385	IRAK3	IRAK3	97	1000
GSK2219385	IRAK4	IRAK4	95	1000
GSK2219385	ITK	ITK	99	1000
GSK2219385	JAK1(JH1domain-catalytic)	JAK1	88	1000
GSK2219385	JAK1(JH2domain-pseudokinase)	JAK1	81	1000
GSK2219385	JAK2(JH1domain-catalytic)	JAK2	100	1000
GSK2219385	JAK3(JH1domain-catalytic)	JAK3	92	1000
GSK2219385	JNK1	MAPK8	88	1000
GSK2219385	JNK2	MAPK9	74	1000
GSK2219385	JNK3	MAPK10	83	1000
GSK2219385	KIT	KIT	100	1000
GSK2219385	KIT(A829P)	KIT	100	1000
GSK2219385	KIT(D816H)	KIT	60	1000
GSK2219385	KIT(D816V)	KIT	81	1000
GSK2219385	KIT(L576P)	KIT	100	1000
GSK2219385	KIT(V559D)	KIT	100	1000
GSK2219385	KIT(V559D,T670I)	KIT	100	1000
GSK2219385	KIT(V559D,V654A)	KIT	93	1000
GSK2219385	KIT-autoinhibited	KIT	100	1000
GSK2219385	LATS1	LATS1	100	1000
GSK2219385	LATS2	LATS2	80	1000
GSK2219385	LCK	LCK	100	1000
GSK2219385	LIMK1	LIMK1	100	1000
GSK2219385	LIMK2	LIMK2	96	1000
GSK2219385	LKB1	STK11	83	1000
GSK2219385	LOK	STK10	100	1000
GSK2219385	LRRK2	LRRK2	11	1000
GSK2219385	LRRK2(G2019S)	LRRK2	8.8	1000
GSK2219385	LTK	LTK	74	1000
GSK2219385	LYN	LYN	100	1000
GSK2219385	LZK	MAP3K13	80	1000
GSK2219385	MAK	MAK	100	1000
GSK2219385	MAP3K1	MAP3K1	83	1000
GSK2219385	MAP3K15	MAP3K15	98	1000
GSK2219385	MAP3K2	MAP3K2	93	1000
GSK2219385	MAP3K3	MAP3K3	67	1000
GSK2219385	MAP3K4	MAP3K4	90	1000
GSK2219385	MAP4K2	MAP4K2	100	1000
GSK2219385	MAP4K3	MAP4K3	100	1000
GSK2219385	MAP4K4	MAP4K4	100	1000
GSK2219385	MAP4K5	MAP4K5	100	1000
GSK2219385	MAPKAPK2	MAPKAPK2	83	1000
GSK2219385	MAPKAPK5	MAPKAPK5	92	1000
GSK2219385	MARK1	MARK1	100	1000
GSK2219385	MARK2	MARK2	95	1000
GSK2219385	MARK3	MARK3	89	1000
GSK2219385	MARK4	MARK4	89	1000
GSK2219385	MAST1	MAST1	44	1000
GSK2219385	MEK1	MAP2K1	100	1000
GSK2219385	MEK2	MAP2K2	100	1000
GSK2219385	MEK3	MAP2K3	91	1000
GSK2219385	MEK4	MAP2K4	94	1000
GSK2219385	MEK5	MAP2K5	85	1000
GSK2219385	MEK6	MAP2K6	100	1000
GSK2219385	MELK	MELK	100	1000
GSK2219385	MERTK	MERTK	87	1000
GSK2219385	MET	MET	65	1000
GSK2219385	MET(M1250T)	MET	100	1000
GSK2219385	MET(Y1235D)	MET	99	1000
GSK2219385	MINK	MINK1	86	1000
GSK2219385	MKK7	MAP2K7	97	1000
GSK2219385	MKNK1	MKNK1	75	1000
GSK2219385	MKNK2	MKNK2	98	1000
GSK2219385	MLCK	MYLK3	78	1000
GSK2219385	MLK1	MAP3K9	55	1000
GSK2219385	MLK2	MAP3K10	100	1000
GSK2219385	MLK3	MAP3K11	100	1000
GSK2219385	MRCKA	CDC42BPA	100	1000
GSK2219385	MRCKB	CDC42BPB	94	1000
GSK2219385	MST1	STK4	100	1000
GSK2219385	MST1R	MST1R	100	1000
GSK2219385	MST2	STK3	85	1000
GSK2219385	MST3	STK24	93	1000
GSK2219385	MST4	MST4	100	1000
GSK2219385	MTOR	MTOR	100	1000
GSK2219385	MUSK	MUSK	84	1000
GSK2219385	MYLK	MYLK	10	1000
GSK2219385	MYLK2	MYLK2	100	1000
GSK2219385	MYLK4	MYLK4	100	1000
GSK2219385	MYO3A	MYO3A	96	1000
GSK2219385	MYO3B	MYO3B	100	1000
GSK2219385	NDR1	STK38	100	1000
GSK2219385	NDR2	STK38L	85	1000
GSK2219385	NEK1	NEK1	100	1000
GSK2219385	NEK10	NEK10	52	1000
GSK2219385	NEK11	NEK11	100	1000
GSK2219385	NEK2	NEK2	72	1000
GSK2219385	NEK3	NEK3	94	1000
GSK2219385	NEK4	NEK4	100	1000
GSK2219385	NEK5	NEK5	94	1000
GSK2219385	NEK6	NEK6	100	1000
GSK2219385	NEK7	NEK7	91	1000
GSK2219385	NEK9	NEK9	90	1000
GSK2219385	NIK	MAP3K14	100	1000
GSK2219385	NIM1	MGC42105	80	1000
GSK2219385	NLK	NLK	95	1000
GSK2219385	OSR1	OXSR1	100	1000
GSK2219385	p38-alpha	MAPK14	97	1000
GSK2219385	p38-beta	MAPK11	100	1000
GSK2219385	p38-delta	MAPK13	100	1000
GSK2219385	p38-gamma	MAPK12	56	1000
GSK2219385	PAK1	PAK1	100	1000
GSK2219385	PAK2	PAK2	74	1000
GSK2219385	PAK3	PAK3	100	1000
GSK2219385	PAK4	PAK4	100	1000
GSK2219385	PAK6	PAK6	96	1000
GSK2219385	PAK7	PAK7	82	1000
GSK2219385	PCTK1	CDK16	79	1000
GSK2219385	PCTK2	CDK17	100	1000
GSK2219385	PCTK3	CDK18	100	1000
GSK2219385	PDGFRA	PDGFRA	100	1000
GSK2219385	PDGFRB	PDGFRB	100	1000
GSK2219385	PDPK1	PDPK1	97	1000
GSK2219385	PFCDPK1(P.falciparum)	CDPK1	100	1000
GSK2219385	PFPK5(P.falciparum)	MAL13P1.279	76	1000
GSK2219385	PFTAIRE2	CDK15	79	1000
GSK2219385	PFTK1	CDK14	100	1000
GSK2219385	PHKG1	PHKG1	100	1000
GSK2219385	PHKG2	PHKG2	83	1000
GSK2219385	PIK3C2B	PIK3C2B	100	1000
GSK2219385	PIK3C2G	PIK3C2G	92	1000
GSK2219385	PIK3CA	PIK3CA	100	1000
GSK2219385	PIK3CA(C420R)	PIK3CA	84	1000
GSK2219385	PIK3CA(E542K)	PIK3CA	100	1000
GSK2219385	PIK3CA(E545A)	PIK3CA	97	1000
GSK2219385	PIK3CA(E545K)	PIK3CA	100	1000
GSK2219385	PIK3CA(H1047L)	PIK3CA	100	1000
GSK2219385	PIK3CA(H1047Y)	PIK3CA	67	1000
GSK2219385	PIK3CA(I800L)	PIK3CA	100	1000
GSK2219385	PIK3CA(M1043I)	PIK3CA	100	1000
GSK2219385	PIK3CA(Q546K)	PIK3CA	100	1000
GSK2219385	PIK3CB	PIK3CB	100	1000
GSK2219385	PIK3CD	PIK3CD	75	1000
GSK2219385	PIK3CG	PIK3CG	100	1000
GSK2219385	PIK4CB	PI4KB	85	1000
GSK2219385	PIKFYVE	PIKFYVE	97	1000
GSK2219385	PIM1	PIM1	90	1000
GSK2219385	PIM2	PIM2	92	1000
GSK2219385	PIM3	PIM3	86	1000
GSK2219385	PIP5K1A	PIP5K1A	100	1000
GSK2219385	PIP5K1C	PIP5K1C	100	1000
GSK2219385	PIP5K2B	PIP4K2B	100	1000
GSK2219385	PIP5K2C	PIP4K2C	92	1000
GSK2219385	PKAC-alpha	PRKACA	100	1000
GSK2219385	PKAC-beta	PRKACB	100	1000
GSK2219385	PKMYT1	PKMYT1	78	1000
GSK2219385	PKN1	PKN1	89	1000
GSK2219385	PKN2	PKN2	88	1000
GSK2219385	PKNB(M.tuberculosis)	pknB	63	1000
GSK2219385	PLK1	PLK1	81	1000
GSK2219385	PLK2	PLK2	100	1000
GSK2219385	PLK3	PLK3	94	1000
GSK2219385	PLK4	PLK4	84	1000
GSK2219385	PRKCD	PRKCD	100	1000
GSK2219385	PRKCE	PRKCE	100	1000
GSK2219385	PRKCH	PRKCH	100	1000
GSK2219385	PRKCI	PRKCI	82	1000
GSK2219385	PRKCQ	PRKCQ	92	1000
GSK2219385	PRKD1	PRKD1	100	1000
GSK2219385	PRKD2	PRKD2	89	1000
GSK2219385	PRKD3	PRKD3	88	1000
GSK2219385	PRKG1	PRKG1	92	1000
GSK2219385	PRKG2	PRKG2	82	1000
GSK2219385	PRKR	EIF2AK2	100	1000
GSK2219385	PRKX	PRKX	95	1000
GSK2219385	PRP4	PRPF4B	100	1000
GSK2219385	PYK2	PTK2B	81	1000
GSK2219385	QSK	KIAA0999	100	1000
GSK2219385	RAF1	RAF1	100	1000
GSK2219385	RET	RET	87	1000
GSK2219385	RET(M918T)	RET	100	1000
GSK2219385	RET(V804L)	RET	100	1000
GSK2219385	RET(V804M)	RET	71	1000
GSK2219385	RIOK1	RIOK1	73	1000
GSK2219385	RIOK2	RIOK2	74	1000
GSK2219385	RIOK3	RIOK3	74	1000
GSK2219385	RIPK1	RIPK1	95	1000
GSK2219385	RIPK2	RIPK2	100	1000
GSK2219385	RIPK4	RIPK4	74	1000
GSK2219385	RIPK5	DSTYK	88	1000
GSK2219385	ROCK1	ROCK1	100	1000
GSK2219385	ROCK2	ROCK2	100	1000
GSK2219385	ROS1	ROS1	84	1000
GSK2219385	RPS6KA4(Kin.Dom.1-N-terminal)	RPS6KA4	92	1000
GSK2219385	RPS6KA4(Kin.Dom.2-C-terminal)	RPS6KA4	68	1000
GSK2219385	RPS6KA5(Kin.Dom.1-N-terminal)	RPS6KA5	100	1000
GSK2219385	RPS6KA5(Kin.Dom.2-C-terminal)	RPS6KA5	90	1000
GSK2219385	RSK1(Kin.Dom.1-N-terminal)	RPS6KA1	56	1000
GSK2219385	RSK1(Kin.Dom.2-C-terminal)	RPS6KA1	96	1000
GSK2219385	RSK2(Kin.Dom.1-N-terminal)	RPS6KA3	21	1000
GSK2219385	RSK2(Kin.Dom.2-C-terminal)	RPS6KA3	100	1000
GSK2219385	RSK3(Kin.Dom.1-N-terminal)	RPS6KA2	79	1000
GSK2219385	RSK3(Kin.Dom.2-C-terminal)	RPS6KA2	90	1000
GSK2219385	RSK4(Kin.Dom.1-N-terminal)	RPS6KA6	75	1000
GSK2219385	RSK4(Kin.Dom.2-C-terminal)	RPS6KA6	82	1000
GSK2219385	S6K1	RPS6KB1	100	1000
GSK2219385	SBK1	SBK1	100	1000
GSK2219385	SGK	SGK1	92	1000
GSK2219385	SgK110	SgK110	100	1000
GSK2219385	SGK2	SGK2	92	1000
GSK2219385	SGK3	SGK3	92	1000
GSK2219385	SIK	SIK1	100	1000
GSK2219385	SIK2	SIK2	100	1000
GSK2219385	SLK	SLK	100	1000
GSK2219385	SNARK	NUAK2	100	1000
GSK2219385	SNRK	SNRK	76	1000
GSK2219385	SRC	SRC	100	1000
GSK2219385	SRMS	SRMS	100	1000
GSK2219385	SRPK1	SRPK1	90	1000
GSK2219385	SRPK2	SRPK2	100	1000
GSK2219385	SRPK3	SRPK3	100	1000
GSK2219385	STK16	STK16	83	1000
GSK2219385	STK33	STK33	91	1000
GSK2219385	STK35	STK35	98	1000
GSK2219385	STK36	STK36	100	1000
GSK2219385	STK39	STK39	81	1000
GSK2219385	SYK	SYK	100	1000
GSK2219385	TAK1	MAP3K7	93	1000
GSK2219385	TAOK1	TAOK1	100	1000
GSK2219385	TAOK2	TAOK2	100	1000
GSK2219385	TAOK3	TAOK3	100	1000
GSK2219385	TBK1	TBK1	69	1000
GSK2219385	TEC	TEC	100	1000
GSK2219385	TESK1	TESK1	92	1000
GSK2219385	TGFBR1	TGFBR1	100	1000
GSK2219385	TGFBR2	TGFBR2	100	1000
GSK2219385	TIE1	TIE1	82	1000
GSK2219385	TIE2	TEK	100	1000
GSK2219385	TLK1	TLK1	85	1000
GSK2219385	TLK2	TLK2	100	1000
GSK2219385	TNIK	TNIK	98	1000
GSK2219385	TNK1	TNK1	83	1000
GSK2219385	TNK2	TNK2	100	1000
GSK2219385	TNNI3K	TNNI3K	100	1000
GSK2219385	TRKA	NTRK1	87	1000
GSK2219385	TRKB	NTRK2	100	1000
GSK2219385	TRKC	NTRK3	100	1000
GSK2219385	TRPM6	TRPM6	100	1000
GSK2219385	TSSK1B	TSSK1B	100	1000
GSK2219385	TSSK3	TSSK3	100	1000
GSK2219385	TTK	TTK	71	1000
GSK2219385	TXK	TXK	90	1000
GSK2219385	TYK2(JH1domain-catalytic)	TYK2	100	1000
GSK2219385	TYK2(JH2domain-pseudokinase)	TYK2	100	1000
GSK2219385	TYRO3	TYRO3	100	1000
GSK2219385	ULK1	ULK1	72	1000
GSK2219385	ULK2	ULK2	80	1000
GSK2219385	ULK3	ULK3	100	1000
GSK2219385	VEGFR2	KDR	100	1000
GSK2219385	VPS34	PIK3C3	82	1000
GSK2219385	VRK2	VRK2	62	1000
GSK2219385	WEE1	WEE1	100	1000
GSK2219385	WEE2	WEE2	90	1000
GSK2219385	WNK1	WNK1	100	1000
GSK2219385	WNK2	WNK2	100	1000
GSK2219385	WNK3	WNK3	100	1000
GSK2219385	WNK4	WNK4	81	1000
GSK2219385	YANK1	STK32A	87	1000
GSK2219385	YANK2	STK32B	100	1000
GSK2219385	YANK3	STK32C	85	1000
GSK2219385	YES	YES1	96	1000
GSK2219385	YSK1	STK25	100	1000
GSK2219385	YSK4	MAP3K19	51	1000
GSK2219385	ZAK	ZAK	90	1000
GSK2219385	ZAP70	ZAP70	81	1000
GSK237701A	AAK1	AAK1	29	1000
GSK237701A	ABL1(E255K)-phosphorylated	ABL1	81	1000
GSK237701A	ABL1(F317I)-nonphosphorylated	ABL1	100	1000
GSK237701A	ABL1(F317I)-phosphorylated	ABL1	86	1000
GSK237701A	ABL1(F317L)-nonphosphorylated	ABL1	92	1000
GSK237701A	ABL1(F317L)-phosphorylated	ABL1	71	1000
GSK237701A	ABL1(H396P)-nonphosphorylated	ABL1	20	1000
GSK237701A	ABL1(H396P)-phosphorylated	ABL1	78	1000
GSK237701A	ABL1(M351T)-phosphorylated	ABL1	56	1000
GSK237701A	ABL1(Q252H)-nonphosphorylated	ABL1	46	1000
GSK237701A	ABL1(Q252H)-phosphorylated	ABL1	76	1000
GSK237701A	ABL1(T315I)-nonphosphorylated	ABL1	51	1000
GSK237701A	ABL1(T315I)-phosphorylated	ABL1	39	1000
GSK237701A	ABL1(Y253F)-phosphorylated	ABL1	83	1000
GSK237701A	ABL1-nonphosphorylated	ABL1	59	1000
GSK237701A	ABL1-phosphorylated	ABL1	81	1000
GSK237701A	ABL2	ABL2	73	1000
GSK237701A	ACVR1	ACVR1	100	1000
GSK237701A	ACVR1B	ACVR1B	100	1000
GSK237701A	ACVR2A	ACVR2A	100	1000
GSK237701A	ACVR2B	ACVR2B	100	1000
GSK237701A	ACVRL1	ACVRL1	100	1000
GSK237701A	ADCK3	CABC1	100	1000
GSK237701A	ADCK4	ADCK4	83	1000
GSK237701A	AKT1	AKT1	100	1000
GSK237701A	AKT2	AKT2	88	1000
GSK237701A	AKT3	AKT3	100	1000
GSK237701A	ALK	ALK	79	1000
GSK237701A	ALK(C1156Y)	ALK	100	1000
GSK237701A	ALK(L1196M)	ALK	94	1000
GSK237701A	AMPK-alpha1	PRKAA1	54	1000
GSK237701A	AMPK-alpha2	PRKAA2	100	1000
GSK237701A	ANKK1	ANKK1	100	1000
GSK237701A	ARK5	NUAK1	29	1000
GSK237701A	ASK1	MAP3K5	100	1000
GSK237701A	ASK2	MAP3K6	97	1000
GSK237701A	AURKA	AURKA	87	1000
GSK237701A	AURKB	AURKB	38	1000
GSK237701A	AURKC	AURKC	74	1000
GSK237701A	AXL	AXL	50	1000
GSK237701A	BIKE	BMP2K	1.4	1000
GSK237701A	BLK	BLK	68	1000
GSK237701A	BMPR1A	BMPR1A	100	1000
GSK237701A	BMPR1B	BMPR1B	88	1000
GSK237701A	BMPR2	BMPR2	72	1000
GSK237701A	BMX	BMX	75	1000
GSK237701A	BRAF	BRAF	100	1000
GSK237701A	BRAF(V600E)	BRAF	75	1000
GSK237701A	BRK	PTK6	100	1000
GSK237701A	BRSK1	BRSK1	76	1000
GSK237701A	BRSK2	BRSK2	47	1000
GSK237701A	BTK	BTK	53	1000
GSK237701A	BUB1	BUB1	56	1000
GSK237701A	CAMK1	CAMK1	86	1000
GSK237701A	CAMK1B	PNCK	87	1000
GSK237701A	CAMK1D	CAMK1D	91	1000
GSK237701A	CAMK1G	CAMK1G	93	1000
GSK237701A	CAMK2A	CAMK2A	89	1000
GSK237701A	CAMK2B	CAMK2B	100	1000
GSK237701A	CAMK2D	CAMK2D	82	1000
GSK237701A	CAMK2G	CAMK2G	88	1000
GSK237701A	CAMK4	CAMK4	100	1000
GSK237701A	CAMKK1	CAMKK1	92	1000
GSK237701A	CAMKK2	CAMKK2	43	1000
GSK237701A	CASK	CASK	88	1000
GSK237701A	CDC2L1	CDK11B	100	1000
GSK237701A	CDC2L2	CDC2L2	97	1000
GSK237701A	CDC2L5	CDK13	75	1000
GSK237701A	CDK11	CDK19	84	1000
GSK237701A	CDK2	CDK2	100	1000
GSK237701A	CDK3	CDK3	100	1000
GSK237701A	CDK4	CDK4	86	1000
GSK237701A	CDK4-cyclinD1	CDK4	81	1000
GSK237701A	CDK4-cyclinD3	CDK4	100	1000
GSK237701A	CDK5	CDK5	100	1000
GSK237701A	CDK7	CDK7	76	1000
GSK237701A	CDK8	CDK8	48	1000
GSK237701A	CDK9	CDK9	100	1000
GSK237701A	CDKL1	CDKL1	94	1000
GSK237701A	CDKL2	CDKL2	86	1000
GSK237701A	CDKL3	CDKL3	76	1000
GSK237701A	CDKL5	CDKL5	100	1000
GSK237701A	CHEK1	CHEK1	100	1000
GSK237701A	CHEK2	CHEK2	100	1000
GSK237701A	CIT	CIT	100	1000
GSK237701A	CLK1	CLK1	81	1000
GSK237701A	CLK2	CLK2	90	1000
GSK237701A	CLK3	CLK3	77	1000
GSK237701A	CLK4	CLK4	68	1000
GSK237701A	CSF1R	CSF1R	63	1000
GSK237701A	CSF1R-autoinhibited	CSF1R	70	1000
GSK237701A	CSK	CSK	88	1000
GSK237701A	CSNK1A1	CSNK1A1	88	1000
GSK237701A	CSNK1A1L	CSNK1A1L	60	1000
GSK237701A	CSNK1D	CSNK1D	100	1000
GSK237701A	CSNK1E	CSNK1E	100	1000
GSK237701A	CSNK1G1	CSNK1G1	85	1000
GSK237701A	CSNK1G2	CSNK1G2	89	1000
GSK237701A	CSNK1G3	CSNK1G3	100	1000
GSK237701A	CSNK2A1	CSNK2A1	83	1000
GSK237701A	CSNK2A2	CSNK2A2	34	1000
GSK237701A	CTK	MATK	78	1000
GSK237701A	DAPK1	DAPK1	55	1000
GSK237701A	DAPK2	DAPK2	81	1000
GSK237701A	DAPK3	DAPK3	79	1000
GSK237701A	DCAMKL1	DCLK1	77	1000
GSK237701A	DCAMKL2	DCLK2	100	1000
GSK237701A	DCAMKL3	DCLK3	100	1000
GSK237701A	DDR1	DDR1	100	1000
GSK237701A	DDR2	DDR2	74	1000
GSK237701A	DLK	MAP3K12	59	1000
GSK237701A	DMPK	DMPK	100	1000
GSK237701A	DMPK2	CDC42BPG	91	1000
GSK237701A	DRAK1	STK17A	100	1000
GSK237701A	DRAK2	STK17B	89	1000
GSK237701A	DYRK1A	DYRK1A	92	1000
GSK237701A	DYRK1B	DYRK1B	100	1000
GSK237701A	DYRK2	DYRK2	68	1000
GSK237701A	EGFR	EGFR	100	1000
GSK237701A	EGFR(E746-A750del)	EGFR	85	1000
GSK237701A	EGFR(G719C)	EGFR	64	1000
GSK237701A	EGFR(G719S)	EGFR	69	1000
GSK237701A	EGFR(L747-E749del, A750P)	EGFR	100	1000
GSK237701A	EGFR(L747-S752del, P753S)	EGFR	86	1000
GSK237701A	EGFR(L747-T751del,Sins)	EGFR	87	1000
GSK237701A	EGFR(L858R)	EGFR	100	1000
GSK237701A	EGFR(L858R,T790M)	EGFR	79	1000
[truncated: 16,721 more rows]
